# Supplementary material for: Plasmodium falciparum S-Adenosylmethionine Synthetase Is Essential for Parasite Survival through a Complex Interaction Network with Cytoplasmic and Nuclear Proteins
Source: MDPI journal article supplement (doi:10.3390/microorganisms10071419), 2022-07-14
Supplement: s1 [file s1]

**Table S1. List of primers.**

| Function                                                                                                  | Name                                            | Sequence 5'-3'                                                                |
|-----------------------------------------------------------------------------------------------------------|-------------------------------------------------|-------------------------------------------------------------------------------|
| <b>Oligonucleotides for the generation of <i>Pf92</i> recombinant protein</b>                             |                                                 |                                                                               |
| Cloning primers                                                                                           | <i>Pf92rp1</i> FP                               | GCGTAGGATCCAATTCTTTGTCAGATAGCC                                                |
|                                                                                                           | <i>Pf92rp1</i> RP                               | TAGGCCTGCAGTTCCTGAATAGGTGGTTG                                                 |
| <b>Oligonucleotides for the generation and verification of <i>PfSAMS</i>-HA-KD Mutant</b>                 |                                                 |                                                                               |
| Cloning Primers                                                                                           | <i>PfSAMS</i> -HA- <i>glmS</i> NotI FP          | tcctccGCGGCCGCGTGAATGAAGGACACCCAGAT                                           |
|                                                                                                           | <i>PfSAMS</i> -HA- <i>glmS</i> XmaI RP          | ctttactCCCGGGATTTTTTAATGCATTTTTTTCGTGAGAT                                     |
| Integration Primers                                                                                       | pSLI- <i>PfSAMS</i> 5' Int <i>glmS</i> FP       | GAGGAAACTTTTTATTACATCTGAA                                                     |
|                                                                                                           | pSLI- <i>PfSAMS</i> 3' Int <i>glmS</i> RP       | CCACATACGCTTAATTATAATATGATG                                                   |
|                                                                                                           | pARL-HA- <i>glmS</i> FP                         | GCTTTACACTTTATGCTTCCGGCTC                                                     |
|                                                                                                           | pSLI-HA- <i>glmS</i> RP                         | TGTCTGTTGTGCCCAGTCAT                                                          |
| <b>Oligonucleotides for the generation of pARL-<i>pfama1</i>-GFP-BirA vector</b>                          |                                                 |                                                                               |
| Cloning primers                                                                                           | GFP FP                                          | AATTAATGTACTTGTATAAATTGTACAAAGGT<br>ACCGGGCCCCCTAGGagtaaaggagaagaacttttcactgg |
|                                                                                                           | GFP RP                                          | ACCACTTCCTGATGTAGATCCACTACCTTTAGCT<br>CTTCCttttagagctcatccatgcc               |
|                                                                                                           | BirA FP                                         | GAGCTAAAGGTAGTGGATCTACATCAGGAA<br>GTGGTAAAGATAATACAGTACCATTAAAATTAATAGC       |
|                                                                                                           | BirA RP                                         | AAATAAGAAAAACGAACATTAAGCTGCCATAT<br>CCCTCGAGttaTTTTTCAGCTGATCTTAATGATATTTcACC |
| <b>Oligonucleotides for the generation of pARL-<i>pfnpa</i>-GFP-BirA vector</b>                           |                                                 |                                                                               |
| Cloning primers                                                                                           | <i>pfnpa</i> -5' FP                             | AAAAAGCGGCCGCCCATACACCAACCAAC                                                 |
|                                                                                                           | <i>pfnpa</i> -3' RP                             | AAAAAGGTACCATGATTATACTAAGGATTGG                                               |
| <b>Oligonucleotides for the generation and verification of <i>PfSAMS</i>-<i>pfnpa</i>-GFP-BirA mutant</b> |                                                 |                                                                               |
| Cloning primers                                                                                           | <i>PfSAMS</i> - <i>pfnpa</i> -GFP-BirA KpnI FP  | cttagtataaatcatggtaccATGAGTCAGTTGAAAATTAAAAG                                  |
|                                                                                                           | <i>PfSAMS</i> - <i>pfnpa</i> -GFP-BirA AvrII RP | agttcttctctttactcctaggATTTTTTAATGCATTTTTTTCGTG                                |

|                                                                                                            |                                                  |                                              |
|------------------------------------------------------------------------------------------------------------|--------------------------------------------------|----------------------------------------------|
| Diagnostic PCR Primer                                                                                      | <i>Pf</i> SAMS- <i>pffn1pa</i> -GFP-BirA KpnI FP | cttagtataaatcatggtaccATGAGTCAGTTGAAAATTAAAAG |
|                                                                                                            | GFP RP                                           | CAAGTGTTGGCCATGGAA                           |
|                                                                                                            | Aldolase RT FP                                   | TAGATGGATTAGCAGAAAGATGC                      |
|                                                                                                            | Aldolase RT RP                                   | TCAAAATCACGCACATCCTG                         |
| <b>Oligonucleotides for the generation and verification of <i>Pf</i>SAMS-<i>pfama1</i>-GFP-BirA mutant</b> |                                                  |                                              |
| Cloning Primers                                                                                            | <i>Pf</i> SAMS- <i>pfama1</i> -GFP-BirA ApaI FP  | atgcatgggcccATGAGTCAGTTGAAAATTAAAAGAGG       |
|                                                                                                            | <i>Pf</i> SAMS- <i>pfama1</i> -GFP-BirA AvrII RP | atgcatcctaggATTTTTTAATGCATTTTTTTCGTGAGAT     |
| Diagnostic PCR Primers                                                                                     | <i>Pf</i> SAMS- <i>pfama1</i> -GFP-BirA ApaI FP  | atgcatgggcccATGAGTCAGTTGAAAATTAAAAGAGG       |
|                                                                                                            | GFP RP                                           | CAAGTGTTGGCCATGGAA                           |
|                                                                                                            | Aldolase RT FP                                   | TAGATGGATTAGCAGAAAGATGC                      |
|                                                                                                            | Aldolase RT RP                                   | TCAAAATCACGCACATCCTG                         |

FP, forward primer; RP, reverse primer; RT, reverse transcriptase; restriction sites indicated in small letters
