# Supplementary material for: Plasmodium falciparum S-Adenosylmethionine Synthetase Is Essential for Parasite Survival through a Complex Interaction Network with Cytoplasmic and Nuclear Proteins
Source: MDPI journal article supplement (doi:10.3390/microorganisms10071419), 2022-07-14
Supplement: s1 [file s1]

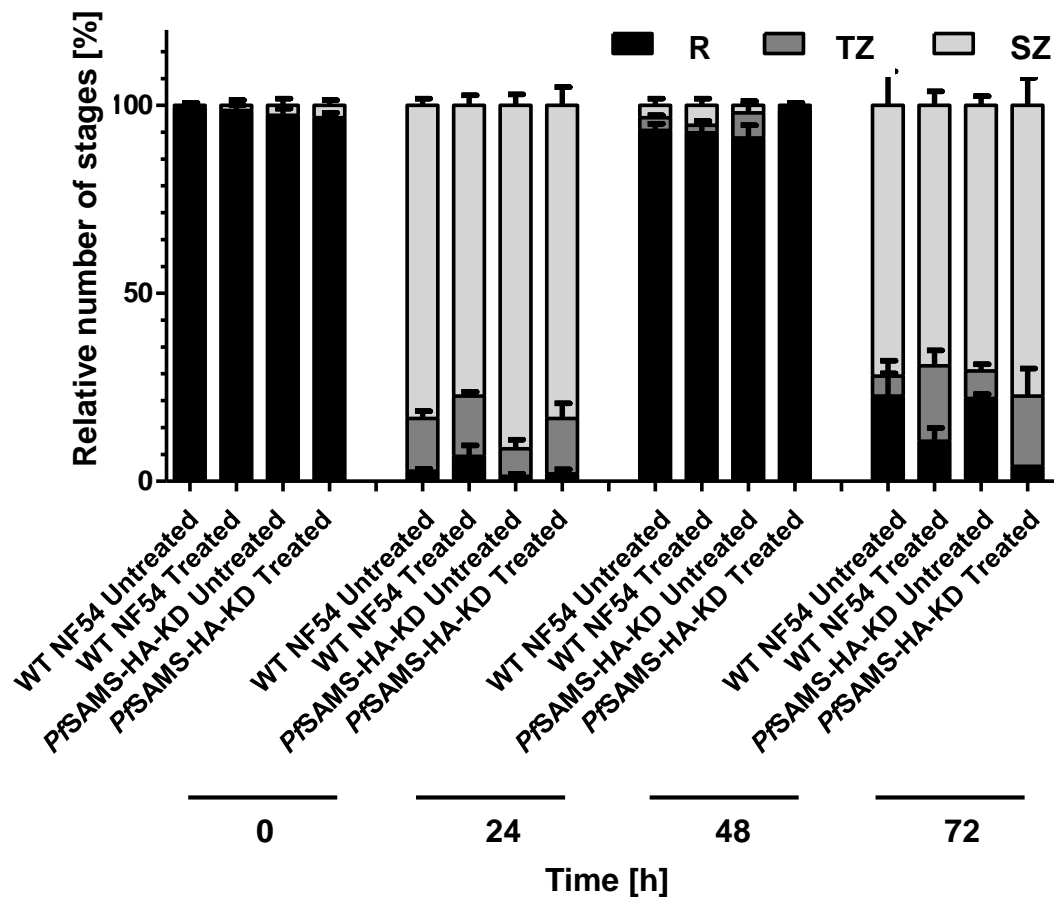

**Figure S3. The effect of *PfSAMS*-HA deficiency on asexual blood stage development.** Synchronized ring stage cultures of WT NF54 and the *PfSAMS*-HA-KD parasite line were treated with 5 mM GlcN at a starting parasitemia of 0.25% and the cultures were maintained in cell culture medium with GlcN over a time-period of 72 h. Rings (R), trophozoites (TZ), and schizonts (SZ) were determined in a total number of 100 iRBCs in triplicate every 24 h via Giemsa-stained blood smears. The results are representative of two independent experiments.
