# Supplementary material for: Plasmodium falciparum S-Adenosylmethionine Synthetase Is Essential for Parasite Survival through a Complex Interaction Network with Cytoplasmic and Nuclear Proteins
Source: MDPI journal article supplement (doi:10.3390/microorganisms10071419), 2022-07-14
Supplement: s1 [file s1]

**Table S5. Selected interactors of *Pf*SAMS sorted by function.**

| Biological function                                     | PlasmoDB ID   | Annotation                                                                             | Log2 ratio |
|---------------------------------------------------------|---------------|----------------------------------------------------------------------------------------|------------|
| <b>Polyamine biosynthesis and methionine metabolism</b> | PF3D7_0922200 | <b>S-adenosylmethionine synthetase (SAMS)</b>                                          | 8.4664     |
|                                                         | PF3D7_1033100 | S-adenosylmethionine decarboxylase/ornithine decarboxylase (AdoMetDC/ODC)              | 4.6214     |
|                                                         | PF3D7_0906500 | Arginase                                                                               | 3.6447     |
|                                                         | PF3D7_1129000 | Spermidine synthase (SpdSyn)                                                           | 3.0292     |
|                                                         | PF3D7_1034900 | Methionine--tRNA ligase (MRSCyt)                                                       | 3.5505     |
|                                                         | PF3D7_1015300 | Methionine aminopeptidase 1b, putative (METAP1b)                                       | 27.0050    |
|                                                         | PF3D7_1434600 | Methionine aminopeptidase 2 (METAP2)                                                   | 3.3955     |
|                                                         | PF3D7_0524900 | S-adenosyl-L-methionine-dependent tRNA 4-demethylwyosine synthase, putative (TYW1)     | 24.8037    |
| <b>Methyltransferases</b>                               | PF3D7_1343000 | Phosphoethanolamine N-methyltransferase (PMT)                                          | 2.3969     |
|                                                         | PF3D7_0811500 | Histone-arginine methyltransferase (CARM1)                                             | 29.8438    |
|                                                         | PF3D7_1361000 | Protein arginine N-methyltransferase 5, putative (PRMT5)                               | 28.8333    |
|                                                         | PF3D7_1426200 | Protein arginine N-methyltransferase 1 (PRMT1)                                         | 4.0960     |
|                                                         | PF3D7_0704200 | RNA cytosine C(5)-methyltransferase, putative (NSUN1)                                  | 27.8855    |
|                                                         | PF3D7_1235600 | Serine hydroxymethyltransferase (SHMT)                                                 | 1.4401     |
|                                                         | PF3D7_1429400 | rRNA (adenosine-2'-O-)-methyltransferase, putative                                     | 27.3882    |
|                                                         | PF3D7_1407100 | rRNA 2'-O-methyltransferase fibrillarin, putative                                      | 2.5999     |
|                                                         | PF3D7_0629700 | SET domain protein, putative (SET1)                                                    | 26.5951    |
|                                                         | PF3D7_1455200 | Methyltransferase AAMT                                                                 | 27.8283    |
|                                                         | PF3D7_0912800 | tRNA (adenine(58)-N(1))-methyltransferase non-catalytic subunit TRM6, putative (GCD10) | 27.1557    |
|                                                         | PF3D7_0628600 | DNA methyltransferase 1-associated protein 1, putative                                 | 27.0066    |
|                                                         | PF3D7_1432700 | Protein-L-isoaspartate(D-aspartate) O-methyltransferase, putative                      | 26.5256    |
|                                                         | PF3D7_0409300 | Methyltransferase, putative                                                            | 26.7827    |
|                                                         | PF3D7_1315700 | tRNA (adenine(58)-N(1))-methyltransferase catalytic subunit TRM61, putative (GCD14)    | 26.8921    |
|                                                         | PF3D7_1355300 | Histone-lysine N-methyltransferase, putative (SET6)                                    | 26.5063    |
|                                                         | PF3D7_1235500 | N6-adenosine-methyltransferase, putative (MA-A70.2)                                    | 26.2478    |
|                                                         | PF3D7_1115200 | Histone-lysine N-methyltransferase SET7 (SET7)                                         | 26.0774    |
|                                                         | PF3D7_1319300 | tRNA (guanine(26)-N(2))-dimethyltransferase, putative (TRM1)                           | 26.4371    |
|                                                         | PF3D7_1111000 | RNA cytosine C(5)-methyltransferase NSUN2                                              | 26.1638    |
|                                                         | PF3D7_0908600 | Ribosomal RNA methyltransferase, putative                                              | 25.5661    |
|                                                         | PF3D7_1142700 | Methyltransferase, putative                                                            | 24.9544    |

|                      |               |                                                                                |         |
|----------------------|---------------|--------------------------------------------------------------------------------|---------|
|                      | PF3D7_0827800 | SET domain protein, putative (SET3)                                            | 26.6929 |
|                      | PF3D7_0508100 | SET domain protein, putative (SET9)                                            | 25.1961 |
| <b>Transcription</b> | PF3D7_0215700 | DNA-directed RNA polymerase subunit beta                                       | 5.5234  |
|                      | PF3D7_1304900 | Probable DNA-directed RNA polymerase II subunit RPB11                          | 28.9151 |
|                      | PF3D7_1406200 | Transcription elongation factor SPT6, putative                                 | 26.8417 |
|                      | PF3D7_0318200 | DNA-directed RNA polymerase subunit                                            | 6.0985  |
|                      | PF3D7_0714500 | Transcription elongation factor s-II, putative                                 | 3.7430  |
|                      | PF3D7_0610900 | Transcription elongation factor SPT5, putative                                 | 26.3238 |
|                      | PF3D7_1213700 | DNA-directed RNA polymerases I, II, and III subunit RPABC3                     | 28.7291 |
|                      | PF3D7_0923000 | DNA-directed RNA polymerase II subunit RPB3, putative                          | 5.5736  |
|                      | PF3D7_0934100 | TFIIH basal transcription factor complex helicase XPD subunit                  | 28.6869 |
|                      | PF3D7_0110400 | DNA-directed RNA polymerase II subunit RPB9, putative                          | 29.8225 |
|                      | PF3D7_0215700 | DNA-directed RNA polymerase subunit beta                                       | 5.5234  |
|                      | PF3D7_1304900 | Probable DNA-directed RNA polymerase II subunit RPB11                          | 28.9151 |
|                      | PF3D7_1406200 | Transcription elongation factor SPT6, putative                                 | 26.8417 |
|                      | PF3D7_0318200 | DNA-directed RNA polymerase subunit                                            | 6.0985  |
|                      | PF3D7_0714500 | Transcription elongation factor s-II, putative                                 | 3.7430  |
|                      | PF3D7_0610900 | Transcription elongation factor SPT5, putative                                 | 26.3238 |
|                      | PF3D7_1213700 | DNA-directed RNA polymerases I, II, and III subunit RPABC3                     | 28.7291 |
|                      | PF3D7_0923000 | DNA-directed RNA polymerase II subunit RPB3, putative                          | 5.57362 |
|                      | PF3D7_0934100 | TFIIH basal transcription factor complex helicase XPD subunit                  | 28.6869 |
| <b>AP2 family</b>    | PF3D7_1107800 | AP2 domain transcription factor, putative                                      | 29.3953 |
|                      | PF3D7_0604100 | AP2 domain transcription factor                                                | 27.1111 |
|                      | PF3D7_0730300 | AP2 domain transcription factor AP2-L, putative                                | 27.6788 |
|                      | PF3D7_0420300 | AP2/ERF domain-containing protein                                              | 26.3499 |
|                      | PF3D7_1449500 | AP2 domain transcription factor AP2-O5, putative                               | 27.3670 |
|                      | PF3D7_1466400 | AP2 domain transcription factor AP2-EXP                                        | 26.7800 |
|                      | PF3D7_1222600 | AP2 domain transcription factor AP2-G                                          | 26.2460 |
|                      | PF3D7_1007700 | AP2 domain transcription factor AP2-I                                          | 26.5790 |
|                      | PF3D7_0613800 | AP2 domain transcription factor, putative                                      | 28.1501 |
| <b>Translation</b>   | PF3D7_1410600 | Eukaryotic translation initiation factor 2 subunit gamma, putative (eIF2gamma) | 4.1457  |
|                      | PF3D7_0728000 | Eukaryotic translation initiation factor 2 subunit alpha                       | 4.1215  |
|                      | PF3D7_1206200 | Eukaryotic translation initiation factor 3 subunit C, putative (EIF3C)         | 3.6096  |

|                   |               |                                                                       |         |
|-------------------|---------------|-----------------------------------------------------------------------|---------|
|                   | PF3D7_0315100 | Eukaryotic translation initiation factor 4E                           | 4.7842  |
|                   | PF3D7_0418200 | Eukaryotic translation initiation factor 3 subunit M, putative        | 3.0595  |
|                   | PF3D7_0517700 | Eukaryotic translation initiation factor 3 subunit B, putative        | 3.3077  |
|                   | PF3D7_0607000 | Translation initiation factor IF-2, putative                          | 4.1469  |
|                   | PF3D7_0716800 | Eukaryotic translation initiation factor 3 subunit I, putative        | 2.4184  |
|                   | PF3D7_0815600 | Eukaryotic translation initiation factor 3 subunit G, putative        | 3.0470  |
|                   | PF3D7_0828500 | Translation initiation factor eIF-2B subunit alpha, putative          | 27.1305 |
|                   | PF3D7_0907600 | Translation initiation factor SUI1, putative                          | 27.6126 |
|                   | PF3D7_0918300 | Eukaryotic translation initiation factor 3 subunit F, putative        | 3.2194  |
|                   | PF3D7_1007900 | Eukaryotic translation initiation factor 3 subunit D, putative        | 2.1301  |
|                   | PF3D7_1010600 | Eukaryotic translation initiation factor 2 subunit beta               | 4.8132  |
|                   | PF3D7_1013900 | Translation initiation factor eIF-2B subunit delta, putative          | 28.3519 |
|                   | PF3D7_1019000 | Eukaryotic translation initiation factor subunit eIF2A, putative      | 27.9313 |
|                   | PF3D7_1112500 | RNA transcription, translation and transport factor protein, putative | 25.1258 |
|                   | PF3D7_1123400 | Eukaryotic peptide chain release factor GTP-binding subunit, putative | 4.3834  |
|                   | PF3D7_1204300 | Eukaryotic translation initiation factor 5A                           | 1.4045  |
|                   | PF3D7_1212700 | Eukaryotic translation initiation factor 3 subunit A, putative        | 3.1286  |
|                   | PF3D7_1244800 | Translation machinery-associated protein 46, putative                 | 27.3477 |
|                   | PF3D7_1250600 | Translation initiation factor eIF-2B subunit beta, putative           | 28.7134 |
|                   | PF3D7_1305300 | Translational activator GCN1, putative                                | 4.8953  |
|                   | PF3D7_1312900 | Eukaryotic translation initiation factor 4 gamma                      | 2.8445  |
|                   | PF3D7_1326400 | Translation initiation factor eIF-2B subunit gamma, putative          | 28.9044 |
|                   | PF3D7_1332800 | Eukaryotic translation initiation factor 6, putative                  | 27.1034 |
|                   | PF3D7_1438000 | Eukaryotic translation initiation factor eIF2A, putative              | 3.01972 |
| <b>Proteasome</b> | PF3D7_1368100 | 26S proteasome regulatory subunit RPN11, putative                     | 4.4773  |
|                   | PF3D7_0727400 | Proteasome subunit alpha type                                         | 4.4586  |
|                   | PF3D7_1402300 | 26S proteasome regulatory subunit RPN6                                | 4.3866  |
|                   | PF3D7_1338100 | 26S proteasome regulatory subunit RPN3, putative                      | 4.5732  |
|                   | PF3D7_0608500 | Proteasome endopeptidase complex                                      | 5.2780  |
|                   | PF3D7_1353900 | Proteasome subunit alpha type                                         | 5.2052  |
|                   | PF3D7_0205900 | 26S proteasome regulatory subunit RPN1, putative                      | 4.0512  |
|                   | PF3D7_0727400 | Proteasome subunit alpha type                                         | 4.4586  |
|                   | PF3D7_1466300 | 26S proteasome regulatory subunit RPN2, putative                      | 4.3325  |
|                   | PF3D7_0807500 | Proteasome endopeptidase complex                                      | 5.3799  |

|               |                                                          |         |
|---------------|----------------------------------------------------------|---------|
| PF3D7_1338100 | 26S proteasome regulatory subunit RPN3, putative         | 4.5732  |
| PF3D7_0317000 | Proteasome subunit alpha type-3, putative                | 5.6213  |
| PF3D7_0518300 | Proteasome subunit beta                                  | 5.3307  |
| PF3D7_1017900 | 26S proteasome regulatory subunit p55, putative          | 5.0310  |
| PF3D7_0528000 | Proteasome maturation factor UMP1, putative              | 27.7918 |
| PF3D7_0912900 | 26S proteasome regulatory subunit RPN8, putative         | 4.9984  |
| PF3D7_1129200 | 26S proteasome regulatory subunit RPN7, putative         | 4.4330  |
| PF3D7_1030500 | 26S proteasome regulatory subunit RPN9, putative         | 4.5958  |
| PF3D7_0807800 | 26S proteasome regulatory subunit RPN10, putative        | 2.2973  |
| PF3D7_0723600 | Proteasome assembly chaperone 4, putative                | 28.5994 |
| PF3D7_0317800 | 26S proteasome non-ATPase regulatory subunit 9, putative | 4.19063 |
| PF3D7_1414000 | 26S proteasome regulatory subunit RPN13, putative        | 4.8404  |
