# Supplementary material for: Plasmodium falciparum S-Adenosylmethionine Synthetase Is Essential for Parasite Survival through a Complex Interaction Network with Cytoplasmic and Nuclear Proteins
Source: MDPI journal article supplement (doi:10.3390/microorganisms10071419), 2022-07-14
Supplement: s1 [file s1]

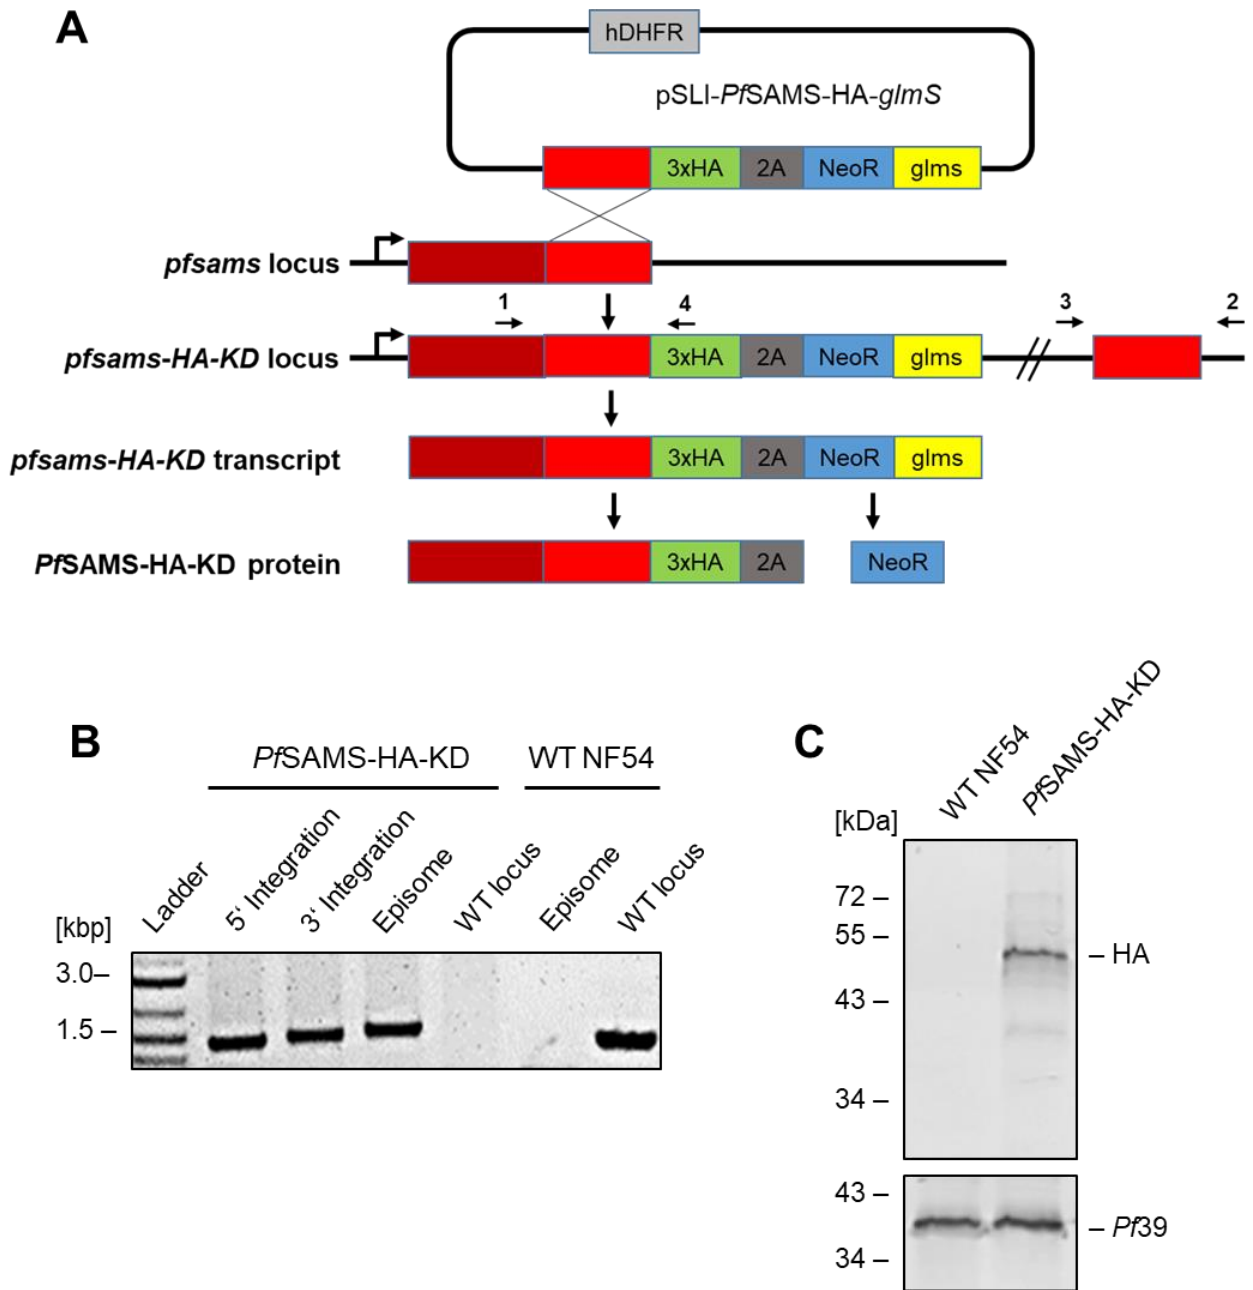

**Figure S1. Generation and verification of the *PfSAMS*-HA-KD parasite line.** (A) Schematic depicting the single-crossover homologous recombination strategy for the generation of the *PfSAMS*-HA-KD line. The coding region of *pfsams* was fused at the 3'-end to a HA-encoding sequence followed by the 2A-skip peptide sequence and the *glmS*-ribozyme sequence. The numbered arrows indicate the positions of primers used to confirm integration of the pSLI-*PfSAMS*-HA-*glmS* vector. *glmS*, glucosamine-6-phosphate-activated ribozyme; HA, hemagglutinin; hDHFR, human dihydrofolate reductase-encoding gene conferring resistance to WR99210; NeoR, gene conferring resistance to neomycin. (B) Confirmation of gene locus integration of the pSLI-*PfSAMS*-HA-*glmS* vector. Diagnostic PCR demonstrates successful 5' (1,412 bp; primers 1 and 4) and 3' (1,471 bp; primers 2 and 3) integration. As a control, WT NF54 gDNA was used, demonstrating the original gene locus (1,368 bp; primers 1 and 2). Episomal DNA was further detected (1,251 bp; primers 3 and 4). (C) Detection of *PfSAMS*-HA in the *PfSAMS*-HA-KD parasite line. Mixed asexual blood stage lysates from the *PfSAMS*-HA-KD parasite line as well as from WT NF54 for control were immunoblotted with rat anti-HA antibody to detect *PfSAMS*-HA (~50 kDa); immunoblotting with rabbit anti-*Pf39* antisera (39 kDa) was used for loading control.
