# Supplementary material for: Plasmodium falciparum S-Adenosylmethionine Synthetase Is Essential for Parasite Survival through a Complex Interaction Network with Cytoplasmic and Nuclear Proteins
Source: MDPI journal article supplement (doi:10.3390/microorganisms10071419), 2022-07-14
Supplement: s1 [file s1]

**A**

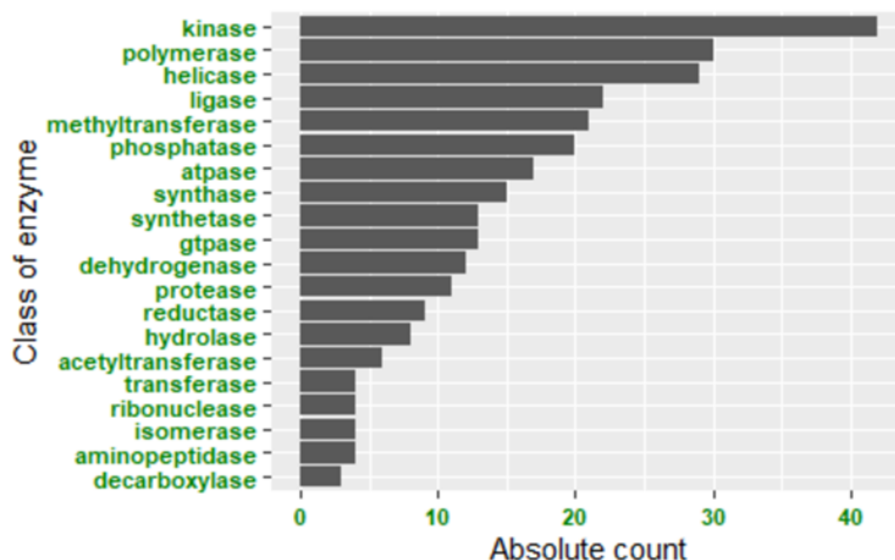

**B**

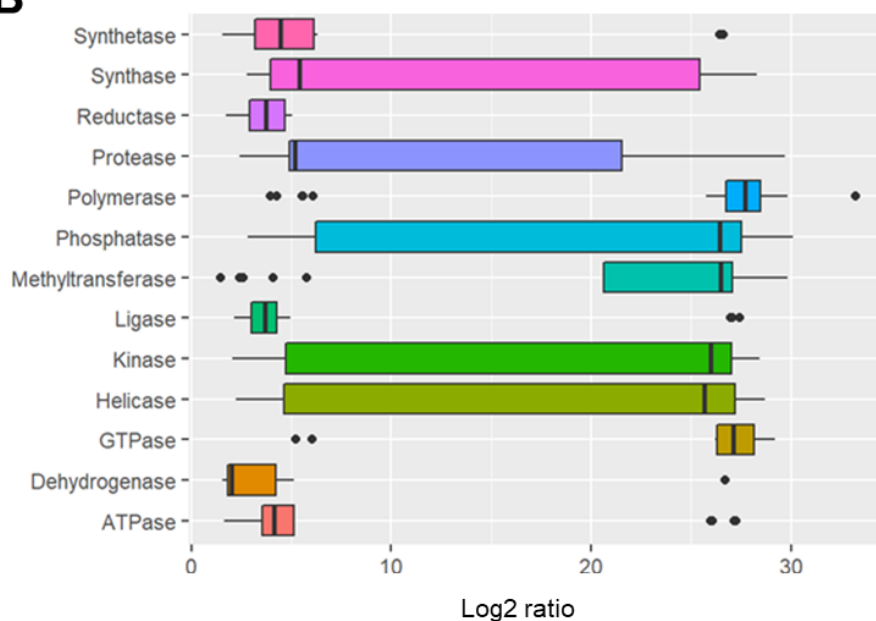

**Figure S8. Distribution of *PfSAMS* interactors with enzymatic functions according to the log<sub>2</sub> ratio.** The 1,114 identified interaction partners with enzymatic function were plotted based on the peptide count and the log<sub>2</sub> ratio. (A) Bar chart showing the classes of enzymes identified in the groups of *PfSAMS* interactors per absolute count. Class names were obtained by text mining of *PfSAMS* interactors' fasta headers acquired from mass spectrometry analysis. (E) Box plot showing the classes of enzymes as identified in (D), based on the log<sub>2</sub> ratio. The line inside each boxplot shows the median of each class.
