# Supplementary material for: Plasmodium falciparum S-Adenosylmethionine Synthetase Is Essential for Parasite Survival through a Complex Interaction Network with Cytoplasmic and Nuclear Proteins
Source: MDPI journal article supplement (doi:10.3390/microorganisms10071419), 2022-07-14
Supplement: s1 [file s1]

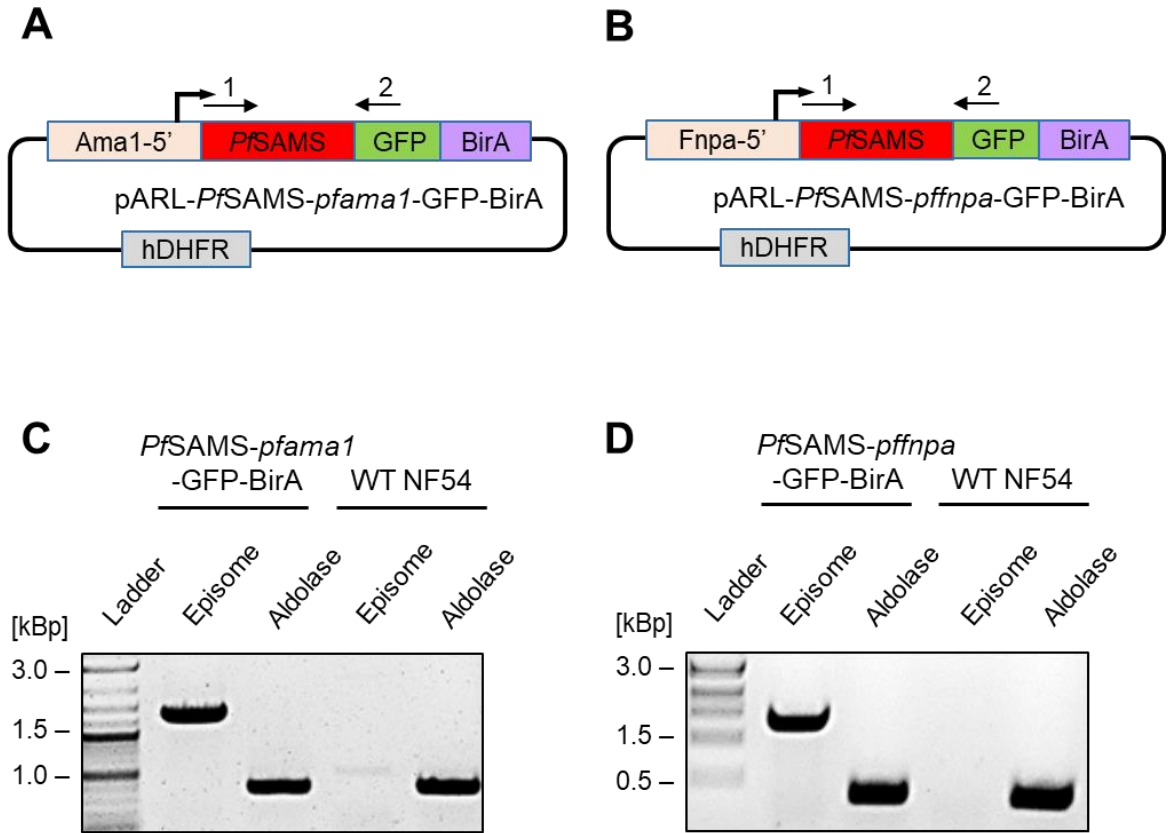

**Figure S4. Verification of the *PfSAMS*-GFP-BirA expression lines.** (A, B) Schematics depicting the vectors pARL-*pfama1*-*PfSAMS*-BirA (A) and pARL-*pffnpa*-*PfSAMS*-BirA (B). BirA, *E. coli* biotin ligase; GFP, green fluorescent protein; hDHFR, human dihydrofolate reductase-encoding gene conferring resistance to WR99210. (D, E) Detection of episomal uptake in the transfectant parasites. Diagnostic PCR was employed to detect the presence of vectors pARL-*PfSAMS-pfama1*-GFP-BirA (C) and pARL-*PfSAMS-pffnpa*-GFP-BirA (D) (1,423 bp; primers 1 and 2) in the transfectant lines, but not the WT NF54. Primers specific for the gene encoding plasmodial aldolase (378 bp) were used as control.
