# Supplementary material for: Plasmodium falciparum S-Adenosylmethionine Synthetase Is Essential for Parasite Survival through a Complex Interaction Network with Cytoplasmic and Nuclear Proteins
Source: MDPI journal article supplement (doi:10.3390/microorganisms10071419), 2022-07-14
Supplement: s1 [file s1]

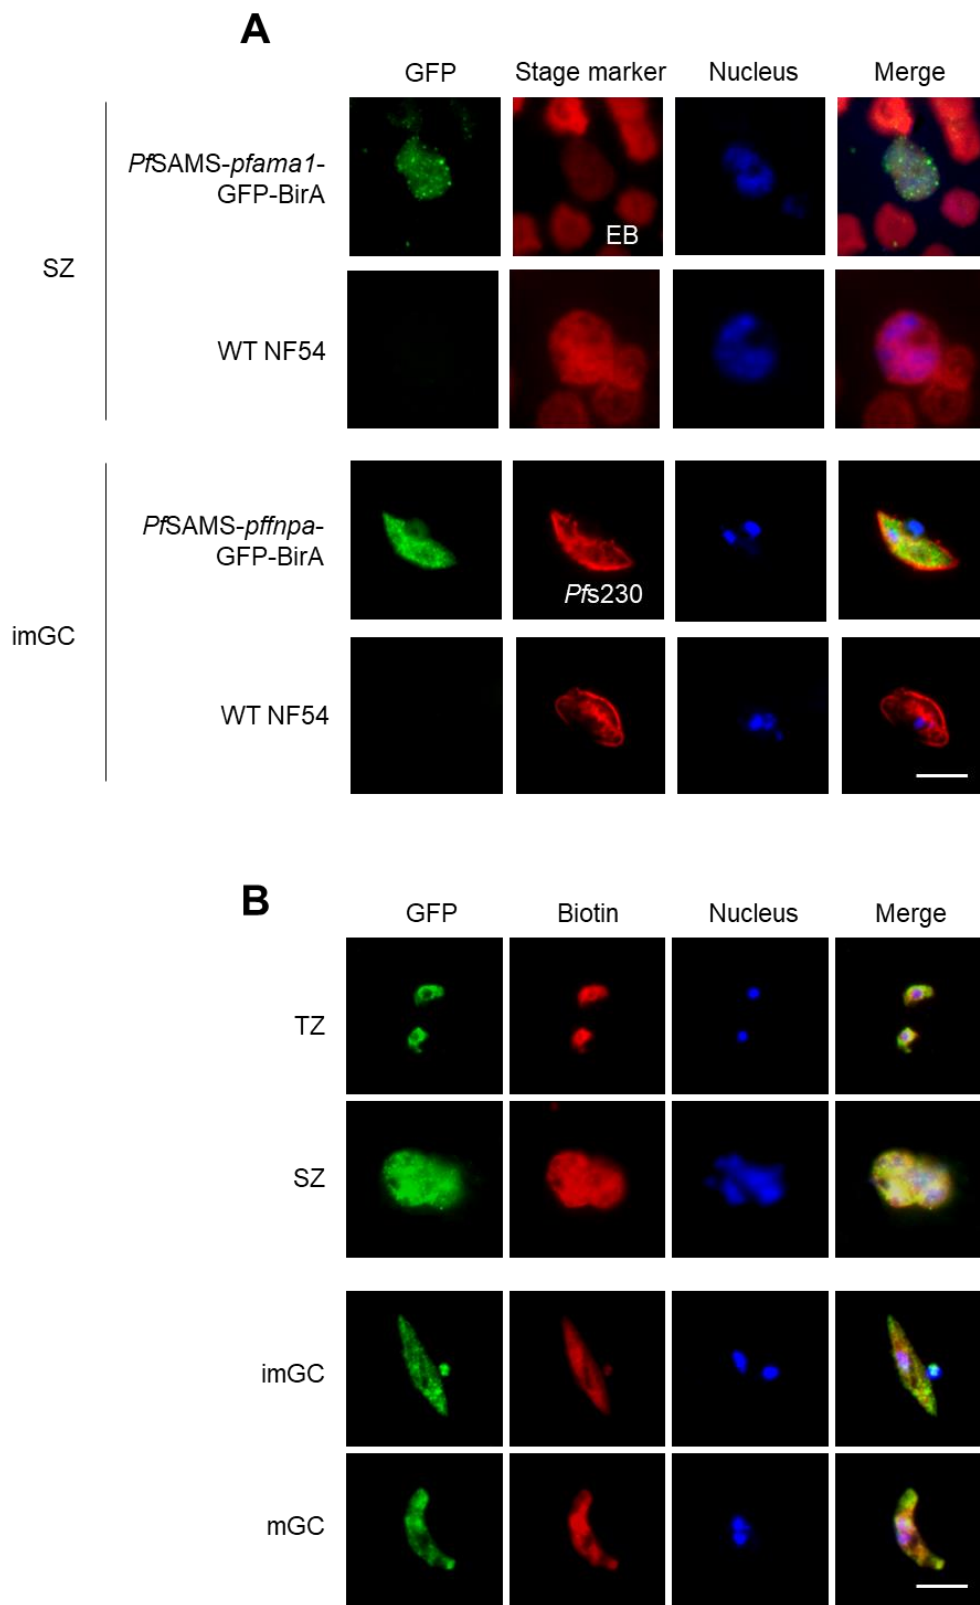

**Figure S5. Localization of *PfSAMS*-GFP-BirA and biotinylated proteins in the blood stages of the *PfSAMS*-GFP-BirA transfectant lines.** (A) Labeling of *PfSAMS*-GFP-BirA in blood stage parasites. Immunofluorescence assays were employed, using asexual blood stages of the *PfSAMS-pfama1*-GFP-BirA line and gametocytes of the *PfSAMS-pffnpa*-GFP-BirA line. Mouse antibodies directed against GFP were used to detect *PfSAMS*-GFP-BirA in schizonts (SZ) and immature gametocytes (imGC) (green). Counterlabeling of the asexual blood stages was done with Evans Blue (EB) stain and of gametocytes with rabbit anti-*Pfs230* antisera (red). The nuclei were labeled with Hoechst 33342 nuclear stain (blue). WT NF54 parasites were used for negative control. (B) Co-localization of *PfSAMS*-GFP-BirA and biotinylated proteins. Asexual blood stages of the *PfSAMS-pfama1*-GFP-BirA line and gametocytes of the *PfSAMS-pffnpa*-GFP-BirA line were treated with 50  $\mu$ M biotin for 24 h and subjected to immunofluorescence assays as described above. Biotinylated proteins were immunolabeled using fluorophore-conjugated streptavidin (red). mGC, mature gametocyte; TZ, trophozoite. Bar; 5  $\mu$ m. The results (A, B) are representative of two independent experiments.
