# Supplementary material for: Plasmodium falciparum S-Adenosylmethionine Synthetase Is Essential for Parasite Survival through a Complex Interaction Network with Cytoplasmic and Nuclear Proteins
Source: MDPI journal article supplement (doi:10.3390/microorganisms10071419), 2022-07-14
Supplement: s1 [file s1]

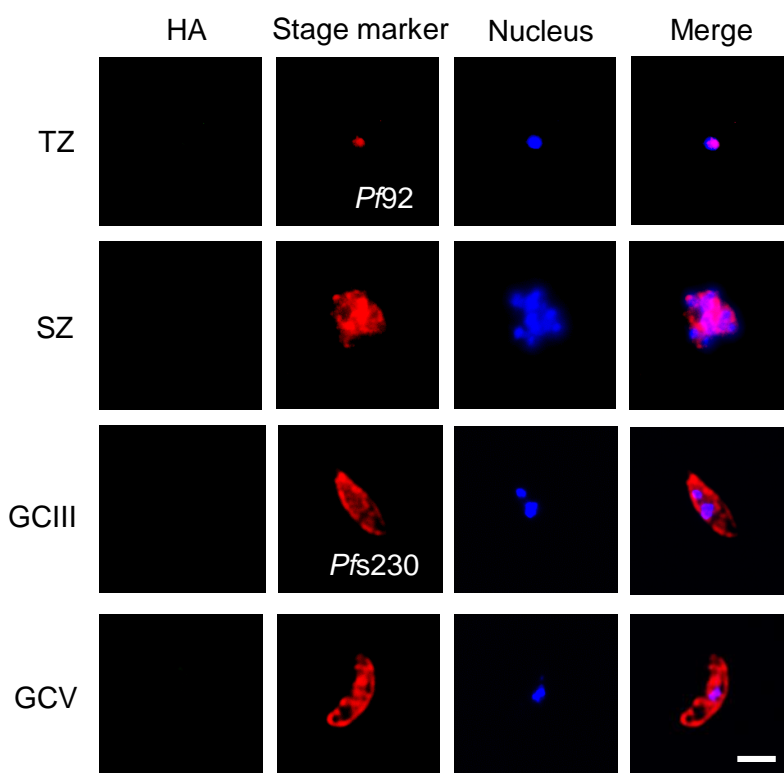

**Figure S2. Immunofluorescence control for the *Pf*SAMS-HA immunolabeling.** Immunofluorescence assays were employed, using rat anti-HA antibody to detect *Pf*SAMS-HA in trophozoites (TZ), schizonts (SZ) and gametocytes (GC) of stages III and V (green) of WT NF54. Counterlabeling of the asexual blood stages was done with mouse anti-*Pf*92 antisera and of gametocytes with rabbit anti-*Pfs*230 antisera (red). The nuclei were labeled with Hoechst 33342 nuclear stain (blue). Bar; 5  $\mu$ m. The results are representative of three independent experiments.
