# Supplementary material for: Plasmodium falciparum S-Adenosylmethionine Synthetase Is Essential for Parasite Survival through a Complex Interaction Network with Cytoplasmic and Nuclear Proteins
Source: Microorganisms. 2022 Jul 14;10(7):1419. doi: 10.3390/microorganisms10071419 (PMC9320499; doi:10.3390/microorganisms10071419)
Supplement: Supplementary file 1 [file microorganisms-10-01419-s001.zip]

Archive with 13 entries (13 files):
- Musabyimana et al-Microorganisms-Table S1.pdf
- Musabyimana et al-Microorganisms-Table S2.xlsx
- Musabyimana et al-Microorganisms-Table S3.xlsx
- Musabyimana et al-Microorganisms-Table S4.xlsx
- Musabyimana et al-Microorganisms-Table S5.pdf
- Musabyimana et al-Microorgranisms-Fig S1.pdf
- Musabyimana et al-Microorgranisms-Fig S2.pdf
- Musabyimana et al-Microorgranisms-Fig S3.pdf
- Musabyimana et al-Microorgranisms-Fig S4.pdf
- Musabyimana et al-Microorgranisms-Fig S5.pdf
- Musabyimana et al-Microorgranisms-Fig S6.pdf
- Musabyimana et al-Microorgranisms-Fig S7.pdf
- Musabyimana et al-Microorgranisms-Fig S8.pdf
