# Supplementary material for: Plasmodium falciparum S-Adenosylmethionine Synthetase Is Essential for Parasite Survival through a Complex Interaction Network with Cytoplasmic and Nuclear Proteins
Source: Microorganisms. 2022 Jul 14;10(7):1419. doi: 10.3390/microorganisms10071419 (PMC9320499; doi:10.3390/microorganisms10071419)
Supplement: Supplementary file 1 [file microorganisms-10-01419-s001.zip › Musabyimana et al-Microorganisms-Table S2.xlsx]

## Sheet: FINAL_PfSAMS_SIGNIFICANT_HIt + 
PlasmoDB_ID	Protein IDs	Gene names	Fasta headers	Number of proteins	Peptides	Sequence length	Q-value	Score	TTEST SAMS vs control	RANK SAMS vs control	ADJ_ALPHA SAMS vs control	SIGNIFICANT_BH SAMS vs control	LOG2_RATIO SAMS vs control	No of replicates	SIGNIFICANT_BH + Log2 SAMS vs control	Interactors_ Log2_and_run_filter SAMS vs control
PF3D7_0922200	Q7K6A4	PfSAMS	tr|Q7K6A4|Q7K6A4_PLAF7 S-adenosylmethionine synthase OS=Plasmodium falciparum (isolate 3D7) OX=36329 GN=PF3D7_0922200 PE=3 SV=1	1	34	402	0	323.31	8.25e-13	754	0.00390876	8.25e-13	8.46643	9	1	1
PF3D7_0708400	Q8IC05	PF07_0029	tr|Q8IC05|Q8IC05_PLAF7 Heat shock protein 90 OS=Plasmodium falciparum (isolate 3D7) OX=36329 GN=PF3D7_0708400 PE=1 SV=1	1	58	745	0	323.31	5.29e-19	93	0.000482115	5.29e-19	4.69991	9	1	1
PF3D7_1008100	Q8IJW2	PF10_0079	tr|Q8IJW2|Q8IJW2_PLAF7 Zinc finger protein, putative OS=Plasmodium falciparum (isolate 3D7) OX=36329 GN=PF3D7_1008100 PE=4 SV=1	1	18	3853	0	70.136	3.47e-23	7	3.63e-05	3.47e-23	26.7664	9	1	1
PF3D7_0818900	Q8IB24	PF08_0054	tr|Q8IB24|Q8IB24_PLAF7 Heat shock protein 70 OS=Plasmodium falciparum (isolate 3D7) OX=36329 GN=PF3D7_0818900 PE=3 SV=1	1	44	677	0	323.31	3.16e-18	131	0.000679108	3.16e-18	3.68812	9	1	1
PF3D7_1444800	A0A144A3T1;Q7KQL9	PF14_0425	tr|A0A144A3T1|A0A144A3T1_PLAF7 Fructose-bisphosphate aldolase OS=Plasmodium falciparum (isolate 3D7) OX=36329 GN=PF3D7_1444800 PE=3 SV=1;sp|Q7KQL9|ALF_PLAF7 Fructose-bisphosphate aldolase OS=Plasmodium falciparum (isolate 3D7) OX=36329 GN=PF14_0425 PE=1 SV	2	28	369	0	323.31	1.59e-12	785	0.00406947	1.59e-12	4.37061	9	1	1
PF3D7_1462800	Q8IKK7	GAPDH	tr|Q8IKK7|Q8IKK7_PLAF7 Glyceraldehyde-3-phosphate dehydrogenase OS=Plasmodium falciparum (isolate 3D7) OX=36329 GN=PF3D7_1462800 PE=3 SV=1	1	26	337	0	323.31	2.79e-06	1338	0.00693624	2.79e-06	2.01645	9	1	1
PF3D7_1357000	Q8I0P6		tr|Q8I0P6|Q8I0P6_PLAF7 Elongation factor 1-alpha OS=Plasmodium falciparum (isolate 3D7) OX=36329 GN=PF3D7_1357000 PE=3 SV=1	1	26	443	0	323.31	1.46e-11	900	0.00466563	1.46e-11	2.59162	9	1	1
PF3D7_1117700	Q7KQK6	PF11_0183	tr|Q7KQK6|Q7KQK6_PLAF7 GTP-binding nuclear protein OS=Plasmodium falciparum (isolate 3D7) OX=36329 GN=PF3D7_1117700 PE=3 SV=1	1	18	214	0	278.47	3.24e-11	943	0.00488854	3.24e-11	5.19227	9	1	1
PF3D7_0904800	Q8I3A1	PFI0235w	tr|Q8I3A1|Q8I3A1_PLAF7 Replication protein A1, small OS=Plasmodium falciparum (isolate 3D7) OX=36329 GN=PF3D7_0904800 PE=4 SV=1	1	23	484	0	323.31	1.57e-15	376	0.0019492	1.57e-15	8.00495	9	1	1
PF3D7_1308200	Q8IEN3	cpsSII	tr|Q8IEN3|Q8IEN3_PLAF7 Carbamoyl phosphate synthetase OS=Plasmodium falciparum (isolate 3D7) OX=36329 GN=PF3D7_1308200 PE=4 SV=1	1	85	2375	0	323.31	2.13e-11	918	0.00475894	2.13e-11	6.11336	9	1	1
PF3D7_0626800	C6KTA4	PFF1300w	tr|C6KTA4|C6KTA4_PLAF7 Pyruvate kinase OS=Plasmodium falciparum (isolate 3D7) OX=36329 GN=PF3D7_0626800 PE=1 SV=1	1	33	511	0	323.31	1.16e-15	359	0.00186107	1.16e-15	3.7097	9	1	1
PF3D7_1138500	Q8IHY0	PF11_0396	tr|Q8IHY0|Q8IHY0_PLAF7 Protein phosphatase PPM2 OS=Plasmodium falciparum (isolate 3D7) OX=36329 GN=PF3D7_1138500 PE=3 SV=2	1	41	924	0	323.31	1.39e-11	899	0.00466045	1.39e-11	7.92417	9	1	1
PF3D7_1015900	A0A143ZZ61;Q8IJN7	ENO	tr|A0A143ZZ61|A0A143ZZ61_PLAF7 Enolase OS=Plasmodium falciparum (isolate 3D7) OX=36329 GN=PF3D7_1015900 PE=3 SV=1;sp|Q8IJN7|ENO_PLAF7 Enolase OS=Plasmodium falciparum (isolate 3D7) OX=36329 GN=ENO PE=3 SV=1	2	36	446	0	323.31	0.00631636	1427	0.00739761	0.00631636	1.62995	9	1	1
PF3D7_1145400	Q8IHR4	dyn1	tr|Q8IHR4|Q8IHR4_PLAF7 Dynamin-like protein OS=Plasmodium falciparum (isolate 3D7) OX=36329 GN=PF3D7_1145400 PE=3 SV=1	1	39	837	0	323.31	7.91e-15	463	0.00240021	7.91e-15	5.82755	9	1	1
PF3D7_1219100	Q8I5L6	PFL0930w	tr|Q8I5L6|Q8I5L6_PLAF7 Clathrin heavy chain OS=Plasmodium falciparum (isolate 3D7) OX=36329 GN=PF3D7_1219100 PE=3 SV=1	1	71	1997	0	323.31	6.43e-10	1109	0.00574909	6.43e-10	4.43577	9	1	1
PF3D7_0915400	Q8I2Z8	PFI0755c	tr|Q8I2Z8|Q8I2Z8_PLAF7 Probable ATP-dependent 6-phosphofructokinase OS=Plasmodium falciparum (isolate 3D7) OX=36329 GN=PF3D7_0915400 PE=3 SV=1	1	68	1418	0	323.31	4.2e-15	427	0.00221358	4.2e-15	4.74028	9	1	1
PF3D7_0917900	Q8I2X4	PFI0875w	tr|Q8I2X4|Q8I2X4_PLAF7 Heat shock protein 70 OS=Plasmodium falciparum (isolate 3D7) OX=36329 GN=PF3D7_0917900 PE=3 SV=1	1	41	652	0	323.31	6.73e-08	1273	0.00659927	6.73e-08	2.05572	9	1	1
PF3D7_0419600	Q76NN6	PFD0950w	tr|Q76NN6|Q76NN6_PLAF7 Ran-specific GTPase-activating protein 1, putative OS=Plasmodium falciparum (isolate 3D7) OX=36329 GN=PF3D7_0419600 PE=4 SV=1	1	15	280	0	323.31	8.12e-14	619	0.00320892	8.12e-14	6.02719	9	1	1
PF3D7_1468700	Q8IKF0	H45	tr|Q8IKF0|Q8IKF0_PLAF7 Eukaryotic initiation factor 4A OS=Plasmodium falciparum (isolate 3D7) OX=36329 GN=PF3D7_1468700 PE=3 SV=1	1	23	398	0	323.31	5.86e-19	95	0.000492483	5.86e-19	3.38071	9	1	1
PF3D7_1246200	A0A144A1R5;Q8I4X0	PFL2215w	tr|A0A144A1R5|A0A144A1R5_PLAF7 Actin I OS=Plasmodium falciparum (isolate 3D7) OX=36329 GN=PF3D7_1246200 PE=3 SV=1;sp|Q8I4X0|ACT1_PLAF7 Actin-1 OS=Plasmodium falciparum (isolate 3D7) OX=36329 GN=PFL2215w PE=1 SV=1	2	22	376	0	323.31	3.38e-14	556	0.00288232	3.38e-14	3.20585	9	1	1
PF3D7_1233600	Q8I586	PFL1620w	tr|Q8I586|Q8I586_PLAF7 Asparagine and aspartate rich protein 1 OS=Plasmodium falciparum (isolate 3D7) OX=36329 GN=PF3D7_1233600 PE=4 SV=1	1	126	5439	0	323.31	1.66e-14	514	0.00266459	1.66e-14	29.6847	9	1	1
PF3D7_0818200	C0H4V6	MAL8P1.69	tr|C0H4V6|C0H4V6_PLAF7 14-3-3 protein OS=Plasmodium falciparum (isolate 3D7) OX=36329 GN=PF3D7_0818200 PE=3 SV=1	1	22	262	0	323.31	5.61e-10	1101	0.00570762	5.61e-10	3.09049	9	1	1
PF3D7_1451100	Q8IKW5	PF14_0486	tr|Q8IKW5|Q8IKW5_PLAF7 Elongation factor 2 OS=Plasmodium falciparum (isolate 3D7) OX=36329 GN=PF3D7_1451100 PE=4 SV=1	1	38	832	0	323.31	3.77e-14	565	0.00292898	3.77e-14	2.79689	9	1	1
PF3D7_0306800	O97247	PFC0285c	tr|O97247|O97247_PLAF7 T-complex protein 1 subunit beta OS=Plasmodium falciparum (isolate 3D7) OX=36329 GN=PF3D7_0306800 PE=3 SV=4	1	32	533	0	323.31	1.39e-10	1025	0.00531363	1.39e-10	5.21066	9	1	1
PF3D7_0524000	Q8I3M5	PFE1195w	tr|Q8I3M5|Q8I3M5_PLAF7 Karyopherin beta OS=Plasmodium falciparum (isolate 3D7) OX=36329 GN=PF3D7_0524000 PE=4 SV=1	1	52	1123	0	323.31	7.2e-15	455	0.00235873	7.2e-15	3.12674	9	1	1
PF3D7_1421400	A0A144A2J0		tr|A0A144A2J0|A0A144A2J0_PLAF7 DNA-directed RNA polymerase III subunit RPC6 OS=Plasmodium falciparum (isolate 3D7) OX=36329 GN=PF3D7_1421400 PE=3 SV=1	1	5	288	0	4.4665	3.81e-10	1080	0.00559876	3.81e-10	33.2141	9	1	1
PF3D7_1465900	Q8IKH8	PF14_0627	tr|Q8IKH8|Q8IKH8_PLAF7 40S ribosomal protein S3 OS=Plasmodium falciparum (isolate 3D7) OX=36329 GN=PF3D7_1465900 PE=1 SV=1	1	14	221	0	204.77	2.79e-15	409	0.00212027	2.79e-15	4.39308	9	1	1
PF3D7_1105000	Q8IIV2	PF11_0061	tr|Q8IIV2|Q8IIV2_PLAF7 Histone H4 OS=Plasmodium falciparum (isolate 3D7) OX=36329 GN=PF3D7_1105000 PE=3 SV=1	1	13	103	0	82.245	0.00107973	1415	0.00733541	0.00107973	1.46918	9	1	1
PF3D7_1343000	Q8IDQ9	PfPMT	tr|Q8IDQ9|Q8IDQ9_PLAF7 Phosphoethanolamine N-methyltransferase OS=Plasmodium falciparum (isolate 3D7) OX=36329 GN=PF3D7_1343000 PE=4 SV=1	1	25	266	0	323.31	2.71e-05	1373	0.00711768	2.71e-05	2.39687	9	1	1
PF3D7_1426700	Q8ILJ7	PF14_0246	tr|Q8ILJ7|Q8ILJ7_PLAF7 Phosphoenolpyruvate carboxylase OS=Plasmodium falciparum (isolate 3D7) OX=36329 GN=PF3D7_1426700 PE=4 SV=1	1	37	1148	0	323.31	7.99e-14	617	0.00319855	7.99e-14	4.30048	9	1	1
PF3D7_0525800	Q8I3K7;O97229	PFE1285w	tr|Q8I3K7|Q8I3K7_PLAF7 Inner membrane complex protein 1g, putative OS=Plasmodium falciparum (isolate 3D7) OX=36329 GN=PF3D7_0525800 PE=4 SV=1	2	15	300	0	323.31	1.44e-14	507	0.00262831	1.44e-14	7.4939	9	1	1
PF3D7_0903700	Q6ZLZ9	PFI0180w	tr|Q6ZLZ9|Q6ZLZ9_PLAF7 Tubulin alpha chain OS=Plasmodium falciparum (isolate 3D7) OX=36329 GN=PF3D7_0903700 PE=3 SV=1	1	18	453	0	323.31	2.18e-11	919	0.00476413	2.18e-11	2.80275	9	1	1
PF3D7_0608500	C6KST3	PFF0420c	tr|C6KST3|C6KST3_PLAF7 Proteasome endopeptidase complex OS=Plasmodium falciparum (isolate 3D7) OX=36329 GN=PF3D7_0608500 PE=1 SV=1	1	15	235	0	323.31	1.37e-11	897	0.00465008	1.37e-11	5.278	9	1	1
PF3D7_1410400	Q8ILZ1	PF14_0102	tr|Q8ILZ1|Q8ILZ1_PLAF7 Rhoptry-associated protein 1 OS=Plasmodium falciparum (isolate 3D7) OX=36329 GN=PF3D7_1410400 PE=4 SV=1	1	37	782	0	323.31	2.91e-06	1339	0.00694142	2.91e-06	2.36528	9	1	1
PF3D7_1130200	Q8II61	PF11_0313	tr|Q8II61|Q8II61_PLAF7 60S acidic ribosomal protein P0 OS=Plasmodium falciparum (isolate 3D7) OX=36329 GN=PF3D7_1130200 PE=3 SV=1	1	17	316	0	283.97	3.05e-12	819	0.00424572	3.05e-12	2.4754	9	1	1
PF3D7_1420200	Q8ILP8	PF14_0196	tr|Q8ILP8|Q8ILP8_PLAF7 Myosin-specific chaperone UNC, putative OS=Plasmodium falciparum (isolate 3D7) OX=36329 GN=PF3D7_1420200 PE=4 SV=1	1	46	1245	0	323.31	2.33e-13	678	0.00351477	2.33e-13	30.9353	9	1	1
PF3D7_1223100	Q7KQK0	PKAr	tr|Q7KQK0|Q7KQK0_PLAF7 cAMP-dependent protein kinase regulatory subunit OS=Plasmodium falciparum (isolate 3D7) OX=36329 GN=PF3D7_1223100 PE=1 SV=1	1	21	441	0	300.05	2.72e-23	6	3.11e-05	2.72e-23	5.11743	9	1	1
PF3D7_1437900	Q8IL88	PF14_0359	tr|Q8IL88|Q8IL88_PLAF7 HSP40, subfamily A OS=Plasmodium falciparum (isolate 3D7) OX=36329 GN=PF3D7_1437900 PE=4 SV=1	1	32	424	0	323.31	1.22e-10	1018	0.00527735	1.22e-10	4.85368	9	1	1
PF3D7_0627800	C6KTB4	PFF1350c	tr|C6KTB4|C6KTB4_PLAF7 Acetyl-CoA synthetase, putative OS=Plasmodium falciparum (isolate 3D7) OX=36329 GN=PF3D7_0627800 PE=4 SV=1	1	28	997	0	323.31	2.52e-15	405	0.00209953	2.52e-15	5.99388	9	1	1
PF3D7_1338300	A0A5K1K967		tr|A0A5K1K967|A0A5K1K967_PLAF7 Elongation factor 1-gamma, putative OS=Plasmodium falciparum (isolate 3D7) OX=36329 GN=PF3D7_1338300 PE=4 SV=1	1	20	411	0	229.5	6.03e-11	980	0.00508035	6.03e-11	3.18103	9	1	1
PF3D7_0608800	Q6LFH8	OAT	sp|Q6LFH8|OAT_PLAF7 Ornithine aminotransferase OS=Plasmodium falciparum (isolate 3D7) OX=36329 GN=OAT PE=1 SV=1	1	24	414	0	263.79	3.79e-06	1341	0.00695179	3.79e-06	1.86824	9	1	1
PF3D7_0517000	Q8I3T8	PFE0850c	tr|Q8I3T8|Q8I3T8_PLAF7 60S ribosomal protein L12, putative OS=Plasmodium falciparum (isolate 3D7) OX=36329 GN=PF3D7_0517000 PE=3 SV=2	1	8	165	0	127.88	1.53e-10	1032	0.00534992	1.53e-10	2.04943	9	1	1
PF3D7_1410200	Q8ILZ3	PF14_0100	tr|Q8ILZ3|Q8ILZ3_PLAF7 CTP synthase OS=Plasmodium falciparum (isolate 3D7) OX=36329 GN=PF3D7_1410200 PE=3 SV=1	1	38	858	0	323.31	1.19e-14	491	0.00254536	1.19e-14	5.61365	9	1	1
PF3D7_1438900	Q8IL80	TPx1	tr|Q8IL80|Q8IL80_PLAF7 Thioredoxin peroxidase 1 OS=Plasmodium falciparum (isolate 3D7) OX=36329 GN=PF3D7_1438900 PE=4 SV=1	1	9	195	0	188.08	1.44e-15	373	0.00193364	1.44e-15	3.92284	9	1	1
PF3D7_1353900	Q8IDG2	MAL13P1.270	tr|Q8IDG2|Q8IDG2_PLAF7 Proteasome subunit alpha type OS=Plasmodium falciparum (isolate 3D7) OX=36329 GN=PF3D7_1353900 PE=1 SV=1	1	12	241	0	323.31	1.68e-10	1038	0.00538103	1.68e-10	5.20522	9	1	1
PF3D7_1120100	Q8IIG6	PF11_0208	tr|Q8IIG6|Q8IIG6_PLAF7 Phosphoglycerate mutase OS=Plasmodium falciparum (isolate 3D7) OX=36329 GN=PF3D7_1120100 PE=1 SV=1	1	18	250	0	129.79	6.9e-10	1114	0.00577501	6.9e-10	2.8481	9	1	1
PF3D7_0511800	Q8I3Y8	PFE0585c	tr|Q8I3Y8|Q8I3Y8_PLAF7 Inositol-3-phosphate synthase OS=Plasmodium falciparum (isolate 3D7) OX=36329 GN=PF3D7_0511800 PE=4 SV=1	1	36	604	0	323.31	3.5e-16	304	0.00157595	3.5e-16	3.4976	9	1	1
PF3D7_1118300	Q8III5	PF11_0189	tr|Q8III5|Q8III5_PLAF7 Insulinase, putative OS=Plasmodium falciparum (isolate 3D7) OX=36329 GN=PF3D7_1118300 PE=4 SV=1	1	49	1488	0	323.31	2.39e-17	200	0.00103681	2.39e-17	4.25969	9	1	1
PF3D7_1014900	Q8IJP6	PF10_0146	tr|Q8IJP6|Q8IJP6_PLAF7 Uncharacterized protein OS=Plasmodium falciparum (isolate 3D7) OX=36329 GN=PF3D7_1014900 PE=4 SV=1	1	33	2279	0	323.31	1.15e-13	645	0.0033437	1.15e-13	31.1579	9	1	1
PF3D7_0302500	O77310;O77309	RhopH1(3.1);RhopH1(3.2)	tr|O77310|O77310_PLAF7 Cytoadherence linked asexual protein 3.1 OS=Plasmodium falciparum (isolate 3D7) OX=36329 GN=PF3D7_0302500 PE=4 SV=2;tr|O77309|O77309_PLAF7 Cytoadherence linked asexual protein 3.2 OS=Plasmodium falciparum (isolate 3D7) OX=36329 GN=PF	2	57	1417	0	323.31	3.57e-07	1303	0.0067548	3.57e-07	2.43025	9	1	1
PF3D7_1346400	C0H5H6	MAL13P1.234	tr|C0H5H6|C0H5H6_PLAF7 VPS13 domain-containing protein, putative OS=Plasmodium falciparum (isolate 3D7) OX=36329 GN=PF3D7_1346400 PE=4 SV=1	1	104	5988	0	323.31	2.21e-14	535	0.00277346	2.21e-14	28.9205	9	1	1
PF3D7_0932300	Q8I2J3	PfM18AAP	tr|Q8I2J3|Q8I2J3_PLAF7 M18 aspartyl aminopeptidase OS=Plasmodium falciparum (isolate 3D7) OX=36329 GN=PF3D7_0932300 PE=1 SV=1	1	18	570	0	291.12	2.88e-14	550	0.00285122	2.88e-14	6.08453	9	1	1
PF3D7_1012700	Q8IJR8	PF10_0124	tr|Q8IJR8|Q8IJR8_PLAF7 NLI interacting factor-like phosphatase, putative OS=Plasmodium falciparum (isolate 3D7) OX=36329 GN=PF3D7_1012700 PE=4 SV=1	1	39	1438	0	323.31	1.34e-10	1022	0.00529808	1.34e-10	30.0973	9	1	1
PF3D7_0710200	Q8IBY8	PF07_0042	tr|Q8IBY8|Q8IBY8_PLAF7 Uncharacterized protein OS=Plasmodium falciparum (isolate 3D7) OX=36329 GN=PF3D7_0710200 PE=4 SV=1	1	97	2910	0	323.31	3.19e-17	210	0.00108865	3.19e-17	28.9693	9	1	1
PF3D7_0309600	O00806	MAL3P3.19	sp|O00806|RLA2_PLAF7 60S acidic ribosomal protein P2 OS=Plasmodium falciparum (isolate 3D7) OX=36329 GN=MAL3P3.19 PE=3 SV=1	1	8	112	0	323.31	9.51e-10	1134	0.00587869	9.51e-10	2.59092	9	1	1
PF3D7_1105100	Q8IIV1	PF11_0062	tr|Q8IIV1|Q8IIV1_PLAF7 Histone H2B OS=Plasmodium falciparum (isolate 3D7) OX=36329 GN=PF3D7_1105100 PE=3 SV=1	1	4	117	0	88.088	0.000199419	1395	0.00723173	0.000199419	2.12083	9	1	1
PF3D7_0621200	C6KT50	pdx1	sp|C6KT50|PDX1_PLAF7 Pyridoxal 5-phosphate synthase subunit Pdx1 OS=Plasmodium falciparum (isolate 3D7) OX=36329 GN=pdx1 PE=1 SV=1	1	20	301	0	202.38	1.05e-08	1230	0.00637636	1.05e-08	3.85547	9	1	1
PF3D7_1468100	Q8IKF6	PF14_0649	tr|Q8IKF6|Q8IKF6_PLAF7 Kelch domain-containing protein, putative OS=Plasmodium falciparum (isolate 3D7) OX=36329 GN=PF3D7_1468100 PE=4 SV=1	1	57	2558	0	323.31	5.16e-15	434	0.00224987	5.16e-15	4.16504	9	1	1
PF3D7_0802000	Q8IAM0	PF08_0132	tr|Q8IAM0|Q8IAM0_PLAF7 Glutamate dehydrogenase, putative OS=Plasmodium falciparum (isolate 3D7) OX=36329 GN=PF3D7_0802000 PE=4 SV=1	1	37	1397	0	323.31	1.79e-13	661	0.00342665	1.79e-13	5.13267	9	1	1
PF3D7_0708800	Q8IC01	PF07_0033	tr|Q8IC01|Q8IC01_PLAF7 Heat shock protein 110 OS=Plasmodium falciparum (isolate 3D7) OX=36329 GN=PF3D7_0708800 PE=4 SV=1	1	33	873	0	323.31	4.9e-14	580	0.00300674	4.9e-14	2.89468	9	1	1
PF3D7_0205900	O96153	PFB0260w	tr|O96153|O96153_PLAF7 26S proteasome regulatory subunit RPN1, putative OS=Plasmodium falciparum (isolate 3D7) OX=36329 GN=PF3D7_0205900 PE=4 SV=3	1	35	966	0	323.31	1.37e-11	896	0.00464489	1.37e-11	4.05114	9	1	1
PF3D7_0826700	Q8IBA0	PfRACK	tr|Q8IBA0|Q8IBA0_PLAF7 Receptor for activated c kinase OS=Plasmodium falciparum (isolate 3D7) OX=36329 GN=PF3D7_0826700 PE=4 SV=1	1	15	323	0	323.31	2.33e-11	925	0.00479523	2.33e-11	2.4418	9	1	1
PF3D7_0405400	Q8I1X5	PFD0265w	tr|Q8I1X5|Q8I1X5_PLAF7 Pre-mRNA-processing-splicing factor 8, putative OS=Plasmodium falciparum (isolate 3D7) OX=36329 GN=PF3D7_0405400 PE=4 SV=1	1	64	3136	0	323.31	2.94e-17	204	0.00105754	2.94e-17	5.37808	9	1	1
PF3D7_1008700	A0A143ZWL7;Q7KQL5	PF10_0084	tr|A0A143ZWL7|A0A143ZWL7_PLAF7 Tubulin beta chain OS=Plasmodium falciparum (isolate 3D7) OX=36329 GN=PF3D7_1008700 PE=3 SV=1;sp|Q7KQL5|TBB_PLAF7 Tubulin beta chain OS=Plasmodium falciparum (isolate 3D7) OX=36329 GN=PF10_0084 PE=3 SV=1	2	22	445	0	323.31	3.72e-08	1261	0.00653707	3.72e-08	2.71553	9	1	1
PF3D7_0918900	Q8I2W4	PFI0925w	tr|Q8I2W4|Q8I2W4_PLAF7 Gamma-glutamylcysteine synthetase OS=Plasmodium falciparum (isolate 3D7) OX=36329 GN=PF3D7_0918900 PE=4 SV=1	1	39	1063	0	323.31	2.38e-16	287	0.00148782	2.38e-16	6.30524	9	1	1
PF3D7_0727400	Q8IBI3	PF07_0112	tr|Q8IBI3|Q8IBI3_PLAF7 Proteasome subunit alpha type OS=Plasmodium falciparum (isolate 3D7) OX=36329 GN=PF3D7_0727400 PE=1 SV=1	1	21	256	0	323.31	1.44e-09	1151	0.00596682	1.44e-09	4.45863	9	1	1
PF3D7_0619400	C6KT34	PFF0940c	tr|C6KT34|C6KT34_PLAF7 Cell division cycle protein 48 homologue, putative OS=Plasmodium falciparum (isolate 3D7) OX=36329 GN=PF3D7_0619400 PE=4 SV=1	1	47	828	0	323.31	6.01e-13	732	0.00379471	6.01e-13	3.14609	9	1	1
PF3D7_1003600	Q8IK01	PF10_0039	tr|Q8IK01|Q8IK01_PLAF7 Inner membrane complex protein 1c, putative OS=Plasmodium falciparum (isolate 3D7) OX=36329 GN=PF3D7_1003600 PE=4 SV=1	1	8	281	0	112.6	7.34e-15	456	0.00236392	7.34e-15	7.82042	9	1	1
PF3D7_1447000	Q8IL02	PF14_0448	tr|Q8IL02|Q8IL02_PLAF7 40S ribosomal protein S5 OS=Plasmodium falciparum (isolate 3D7) OX=36329 GN=PF3D7_1447000 PE=1 SV=1	1	15	272	0	145.91	7.09e-13	740	0.00383619	7.09e-13	3.66126	9	1	1
PF3D7_1362200	Q8ID85	PF13_0330	tr|Q8ID85|Q8ID85_PLAF7 RuvB-like helicase OS=Plasmodium falciparum (isolate 3D7) OX=36329 GN=PF3D7_1362200 PE=3 SV=1	1	22	483	0	323.31	2.95e-19	82	0.000425091	2.95e-19	6.16032	9	1	1
PF3D7_1466300	Q8IKH3	PF14_0632	tr|Q8IKH3|Q8IKH3_PLAF7 26S proteasome regulatory subunit RPN2, putative OS=Plasmodium falciparum (isolate 3D7) OX=36329 GN=PF3D7_1466300 PE=3 SV=1	1	36	1172	0	323.31	5.78e-18	150	0.000777605	5.78e-18	4.33245	9	1	1
PF3D7_1011800	Q8IJS7	PF10_0115	tr|Q8IJS7|Q8IJS7_PLAF7 PRE-binding protein OS=Plasmodium falciparum (isolate 3D7) OX=36329 GN=PF3D7_1011800 PE=4 SV=1	1	39	1139	0	323.31	2.7e-21	36	0.000186625	2.7e-21	3.58904	9	1	1
PF3D7_0807500	Q8IAR3	MAL8P1.128	tr|Q8IAR3|Q8IAR3_PLAF7 Proteasome endopeptidase complex OS=Plasmodium falciparum (isolate 3D7) OX=36329 GN=PF3D7_0807500 PE=1 SV=2	1	17	260	0	253.99	6.19e-11	982	0.00509072	6.19e-11	5.37992	9	1	1
PF3D7_0905400	Q8I395	PFI0265c	tr|Q8I395|Q8I395_PLAF7 High molecular weight rhoptry protein 3 OS=Plasmodium falciparum (isolate 3D7) OX=36329 GN=PF3D7_0905400 PE=4 SV=1	1	39	897	0	323.31	7.22e-05	1389	0.00720062	7.22e-05	2.06033	9	1	1
PF3D7_1015800	Q8IJN8	PF10_0154	tr|Q8IJN8|Q8IJN8_PLAF7 Ribonucleoside-diphosphate reductase small chain, putative OS=Plasmodium falciparum (isolate 3D7) OX=36329 GN=PF3D7_1015800 PE=4 SV=2	1	21	335	0	307.93	2.55e-17	202	0.00104718	2.55e-17	4.66956	9	1	1
PF3D7_1474800	Q8IK90	PF14_0716	tr|Q8IK90|Q8IK90_PLAF7 Proteasome endopeptidase complex OS=Plasmodium falciparum (isolate 3D7) OX=36329 GN=PF3D7_1474800 PE=1 SV=1	1	11	254	0	323.31	1.21e-12	771	0.00399689	1.21e-12	5.50114	9	1	1
PF3D7_1248900	Q8I4U5	PFL2345c	tr|Q8I4U5|Q8I4U5_PLAF7 26S protease regulatory subunit 8, putative OS=Plasmodium falciparum (isolate 3D7) OX=36329 GN=PF3D7_1248900 PE=3 SV=1	1	23	435	0	323.31	3.43e-15	418	0.00216693	3.43e-15	5.30433	9	1	1
PF3D7_0922600	C0H551	PFI1110w	tr|C0H551|C0H551_PLAF7 Glutamine synthetase, putative OS=Plasmodium falciparum (isolate 3D7) OX=36329 GN=PF3D7_0922600 PE=3 SV=1	1	23	543	0	323.31	7.57e-19	104	0.000539139	7.57e-19	4.65353	9	1	1
PF3D7_1357800	C0H5I7	MAL13P1.283	tr|C0H5I7|C0H5I7_PLAF7 T-complex protein 1 subunit delta OS=Plasmodium falciparum (isolate 3D7) OX=36329 GN=PF3D7_1357800 PE=3 SV=1	1	32	529	0	323.31	1.55e-20	51	0.000264386	1.55e-20	3.55881	9	1	1
PF3D7_0413600	Q8I1V1	PFD0665c	tr|Q8I1V1|Q8I1V1_PLAF7 26S protease regulatory subunit 6B, putative OS=Plasmodium falciparum (isolate 3D7) OX=36329 GN=PF3D7_0413600 PE=3 SV=1	1	20	392	0	323.31	1.57e-14	511	0.00264904	1.57e-14	4.92343	9	1	1
PF3D7_1457300	Q8IKQ7	PF14_0546	tr|Q8IKQ7|Q8IKQ7_PLAF7 MA3 domain-containing protein, putative OS=Plasmodium falciparum (isolate 3D7) OX=36329 GN=PF3D7_1457300 PE=4 SV=1	1	23	639	0	323.31	5.09e-11	969	0.00502333	5.09e-11	5.19907	9	1	1
PF3D7_1402300	Q8IM66	PF14_0025	tr|Q8IM66|Q8IM66_PLAF7 26S proteasome regulatory subunit RPN6 OS=Plasmodium falciparum (isolate 3D7) OX=36329 GN=PF3D7_1402300 PE=4 SV=1	1	25	666	0	245.16	3.18e-12	822	0.00426128	3.18e-12	4.3866	9	1	1
PF3D7_1105400	Q8IIU8	PF11_0065	tr|Q8IIU8|Q8IIU8_PLAF7 40S ribosomal protein S4 OS=Plasmodium falciparum (isolate 3D7) OX=36329 GN=PF3D7_1105400 PE=1 SV=2	1	15	261	0	49.145	1.14e-08	1232	0.00638673	1.14e-08	2.88686	9	1	1
PF3D7_0606700	C6KSR5	PFF0330w	tr|C6KSR5|C6KSR5_PLAF7 Coatomer alpha subunit, putative OS=Plasmodium falciparum (isolate 3D7) OX=36329 GN=PF3D7_0606700 PE=4 SV=1	1	35	1512	0	267.99	1.93e-14	527	0.00273199	1.93e-14	5.11128	9	1	1
PF3D7_0622800	C6KT64	PFF1095w	tr|C6KT64|C6KT64_PLAF7 Leucine--tRNA ligase, putative OS=Plasmodium falciparum (isolate 3D7) OX=36329 GN=PF3D7_0622800 PE=1 SV=1	1	41	1447	0	323.31	7.9e-17	244	0.0012649	7.9e-17	2.13873	9	1	1
PF3D7_0317700	O77380	PFC0780w	tr|O77380|O77380_PLAF7 CPSF (Cleavage and polyadenylation specific factor), subunit A, putative OS=Plasmodium falciparum (isolate 3D7) OX=36329 GN=PF3D7_0317700 PE=4 SV=2	1	53	2870	0	323.31	4.89e-13	719	0.00372732	4.89e-13	28.9192	9	1	1
PF3D7_1410300	Q8ILZ2	PF14_0101	tr|Q8ILZ2|Q8ILZ2_PLAF7 WD repeat-containing protein, putative OS=Plasmodium falciparum (isolate 3D7) OX=36329 GN=PF3D7_1410300 PE=4 SV=1	1	70	4405	0	323.31	6.64e-16	339	0.00175739	6.64e-16	28.4853	9	1	1
PF3D7_0624600	C6KT82	PFF1185w	tr|C6KT82|C6KT82_PLAF7 SNF2 helicase, putative OS=Plasmodium falciparum (isolate 3D7) OX=36329 GN=PF3D7_0624600 PE=4 SV=1	1	50	2719	0	323.31	1.47e-16	270	0.00139969	1.47e-16	6.36841	9	1	1
PF3D7_0215700	O96236	PFB0715w	tr|O96236|O96236_PLAF7 DNA-directed RNA polymerase subunit beta OS=Plasmodium falciparum (isolate 3D7) OX=36329 GN=PF3D7_0215700 PE=3 SV=3	1	42	1340	0	323.31	2.09e-13	671	0.00347849	2.09e-13	5.52344	9	1	1
PF3D7_0302900	O77312	PFC0135c	tr|O77312|O77312_PLAF7 Exportin-1, putative OS=Plasmodium falciparum (isolate 3D7) OX=36329 GN=PF3D7_0302900 PE=4 SV=2	1	41	1254	0	323.31	9.06e-15	478	0.00247797	9.06e-15	3.80636	9	1	1
PF3D7_1408700	Q8IM09	PF14_0084	tr|Q8IM09|Q8IM09_PLAF7 Uncharacterized protein OS=Plasmodium falciparum (isolate 3D7) OX=36329 GN=PF3D7_1408700 PE=4 SV=2	1	98	7182	0	323.31	1.83e-12	793	0.00411094	1.83e-12	28.0085	9	1	1
PF3D7_1302100	Q8IEU2	pfg27-25	tr|Q8IEU2|Q8IEU2_PLAF7 Gamete antigen 27/25 OS=Plasmodium falciparum (isolate 3D7) OX=36329 GN=PF3D7_1302100 PE=1 SV=1	1	9	217	0	96.979	2.31e-15	398	0.00206325	2.31e-15	4.718	9	1	1
PF3D7_1338100	A0A5K1K9F3		tr|A0A5K1K9F3|A0A5K1K9F3_PLAF7 26S proteasome regulatory subunit RPN3, putative OS=Plasmodium falciparum (isolate 3D7) OX=36329 GN=PF3D7_1338100 PE=4 SV=1	1	19	503	0	220.83	1.31e-12	774	0.00401244	1.31e-12	4.57322	9	1	1
PF3D7_1424100	Q8ILL3	PF14_0230	tr|Q8ILL3|Q8ILL3_PLAF7 60S ribosomal protein L5, putative OS=Plasmodium falciparum (isolate 3D7) OX=36329 GN=PF3D7_1424100 PE=1 SV=1	1	15	294	0	215.12	3.26e-12	824	0.00427164	3.26e-12	2.20645	9	1	1
PF3D7_0318200	O77375	PFC0805w	tr|O77375|O77375_PLAF7 DNA-directed RNA polymerase subunit OS=Plasmodium falciparum (isolate 3D7) OX=36329 GN=PF3D7_0318200 PE=3 SV=1	1	47	2457	0	323.31	1.66e-14	516	0.00267496	1.66e-14	6.09845	9	1	1
PF3D7_0608700	C6KST5	PFF0430w	tr|C6KST5|C6KST5_PLAF7 T-complex protein 1 subunit zeta OS=Plasmodium falciparum (isolate 3D7) OX=36329 GN=PF3D7_0608700 PE=3 SV=1	1	29	543	0	245.37	4.39e-16	315	0.00163297	4.39e-16	3.4184	9	1	1
PF3D7_0624000	C6KT76	PFF1155w	tr|C6KT76|C6KT76_PLAF7 Phosphotransferase OS=Plasmodium falciparum (isolate 3D7) OX=36329 GN=PF3D7_0624000 PE=3 SV=1	1	21	493	0	323.31	1.86e-21	27	0.000139969	1.86e-21	3.16213	9	1	1
PF3D7_0520000	Q8I3R0	PFE1005w	tr|Q8I3R0|Q8I3R0_PLAF7 40S ribosomal protein S9, putative OS=Plasmodium falciparum (isolate 3D7) OX=36329 GN=PF3D7_0520000 PE=1 SV=1	1	8	189	0	29.478	8.95e-15	476	0.0024676	8.95e-15	3.48331	9	1	1
PF3D7_0317000	O77396	PFC0745c	tr|O77396|O77396_PLAF7 Proteasome subunit alpha type-3, putative OS=Plasmodium falciparum (isolate 3D7) OX=36329 GN=PF3D7_0317000 PE=1 SV=1	1	12	252	0	323.31	7.4e-11	991	0.00513738	7.4e-11	5.62129	9	1	1
PF3D7_1205600	Q8I5Y9	PFL0280c	tr|Q8I5Y9|Q8I5Y9_PLAF7 Tetratricopeptide repeat protein, putative OS=Plasmodium falciparum (isolate 3D7) OX=36329 GN=PF3D7_1205600 PE=4 SV=1	1	16	333	0	273.62	8.6e-20	67	0.00034733	8.6e-20	5.11571	9	1	1
PF3D7_1311900	Q76NM6	vapA	sp|Q76NM6|VATA_PLAF7 V-type proton ATPase catalytic subunit A OS=Plasmodium falciparum (isolate 3D7) OX=36329 GN=vapA PE=1 SV=1	1	31	611	0	323.31	4.3e-12	836	0.00433385	4.3e-12	3.64317	9	1	1
PF3D7_1311500	Q8IEK3	PF13_0063	tr|Q8IEK3|Q8IEK3_PLAF7 26S protease regulatory subunit 7, putative OS=Plasmodium falciparum (isolate 3D7) OX=36329 GN=PF3D7_1311500 PE=3 SV=2	1	26	420	0	323.31	8.28e-16	346	0.00179368	8.28e-16	4.91518	9	1	1
PF3D7_0500800	Q8I492	MESA	tr|Q8I492|Q8I492_PLAF7 Mature parasite-infected erythrocyte surface antigen OS=Plasmodium falciparum (isolate 3D7) OX=36329 GN=PF3D7_0500800 PE=4 SV=1	1	43	1434	0	323.31	0.000131724	1391	0.00721099	0.000131724	1.50061	9	1	1
PF3D7_0621800	C6KT55	PFF1050w	tr|C6KT55|C6KT55_PLAF7 Nascent polypeptide-associated complex subunit alpha, putative OS=Plasmodium falciparum (isolate 3D7) OX=36329 GN=PF3D7_0621800 PE=4 SV=1	1	11	184	0	243.46	5.27e-14	587	0.00304303	5.27e-14	4.44537	9	1	1
PF3D7_0811500	A0A5K1K956		tr|A0A5K1K956|A0A5K1K956_PLAF7 Histone-arginine methyltransferase CARM1, putative OS=Plasmodium falciparum (isolate 3D7) OX=36329 GN=PF3D7_0811500 PE=4 SV=1	1	33	912	0	323.31	3.33e-17	213	0.0011042	3.33e-17	29.8438	9	1	1
PF3D7_0518300	A0A5K1K7U1		tr|A0A5K1K7U1|A0A5K1K7U1_PLAF7 Proteasome subunit beta OS=Plasmodium falciparum (isolate 3D7) OX=36329 GN=PF3D7_0518300 PE=3 SV=1	1	11	240	0	258.96	2.34e-10	1054	0.00546397	2.34e-10	5.33071	9	1	1
PF3D7_1365900	Q8ID50;Q7KQK2	PF13_0346;PFL0585w	tr|Q8ID50|Q8ID50_PLAF7 Ubiquitin-60S ribosomal protein L40 OS=Plasmodium falciparum (isolate 3D7) OX=36329 GN=PF3D7_1365900 PE=1 SV=1;tr|Q7KQK2|Q7KQK2_PLAF7 Polyubiquitin OS=Plasmodium falciparum (isolate 3D7) OX=36329 GN=PF3D7_1211800 PE=4 SV=1	2	6	128	0	189.79	2.56e-09	1174	0.00608605	2.56e-09	3.34994	9	1	1
PF3D7_1361800	A0A5K1K8J3		tr|A0A5K1K8J3|A0A5K1K8J3_PLAF7 Glideosome-associated connector OS=Plasmodium falciparum (isolate 3D7) OX=36329 GN=PF3D7_1361800 PE=4 SV=1	1	69	2605	0	323.31	9.59e-13	756	0.00391913	9.59e-13	3.72656	9	1	1
PF3D7_1147500	Q8IHP6	PF11_0483	tr|Q8IHP6|Q8IHP6_PLAF7 Protein farnesyltransferase subunit beta OS=Plasmodium falciparum (isolate 3D7) OX=36329 GN=PF3D7_1147500 PE=4 SV=2	1	26	923	0	323.31	8.05e-13	753	0.00390358	8.05e-13	29.6716	9	1	1
PF3D7_1003800	Q8IJZ9	PF10_0041	tr|Q8IJZ9|Q8IJZ9_PLAF7 U5 small nuclear ribonucleoprotein component, putative OS=Plasmodium falciparum (isolate 3D7) OX=36329 GN=PF3D7_1003800 PE=4 SV=1	1	37	1235	0	323.31	7.99e-15	464	0.00240539	7.99e-15	5.6355	9	1	1
PF3D7_1470900	Q8IKC9	PF14_0676	tr|Q8IKC9|Q8IKC9_PLAF7 Proteasome subunit beta OS=Plasmodium falciparum (isolate 3D7) OX=36329 GN=PF3D7_1470900 PE=1 SV=2	1	17	195	0	244.03	4.28e-12	834	0.00432348	4.28e-12	5.92274	9	1	1
PF3D7_0322900	O97313		sp|O97313|RS3A_PLAF7 40S ribosomal protein S3a OS=Plasmodium falciparum (isolate 3D7) OX=36329 GN=MAL3P7.35 PE=1 SV=1	1	16	262	0	177.33	4.61e-14	578	0.00299637	4.61e-14	3.41712	9	1	1
PF3D7_0316800	O77395	PFC0735w	tr|O77395|O77395_PLAF7 40S ribosomal protein S15A, putative OS=Plasmodium falciparum (isolate 3D7) OX=36329 GN=PF3D7_0316800 PE=1 SV=1	1	7	130	0	40.752	2.49e-15	402	0.00208398	2.49e-15	3.98819	9	1	1
PF3D7_1224300	Q8I5H4	PFL1170w	tr|Q8I5H4|Q8I5H4_PLAF7 Polyadenylate-binding protein OS=Plasmodium falciparum (isolate 3D7) OX=36329 GN=PF3D7_1224300 PE=3 SV=1	1	26	875	0	257	5.55e-12	847	0.00439088	5.55e-12	3.02079	9	1	1
PF3D7_0717700	Q8IBS3	PF07_0073	tr|Q8IBS3|Q8IBS3_PLAF7 Serine--tRNA ligase, putative OS=Plasmodium falciparum (isolate 3D7) OX=36329 GN=PF3D7_0717700 PE=4 SV=1	1	25	539	0	323.31	9.94e-11	1010	0.00523587	9.94e-11	4.93776	9	1	1
PF3D7_1429800	Q8ILG6	PF14_0277	tr|Q8ILG6|Q8ILG6_PLAF7 Coatomer subunit beta, putative OS=Plasmodium falciparum (isolate 3D7) OX=36329 GN=PF3D7_1429800 PE=4 SV=2	1	30	1370	0	323.31	3.19e-17	209	0.00108346	3.19e-17	4.08299	9	1	1
PF3D7_1441200	Q8IL58	PF14_0391	tr|Q8IL58|Q8IL58_PLAF7 60S ribosomal protein L1, putative OS=Plasmodium falciparum (isolate 3D7) OX=36329 GN=PF3D7_1441200 PE=4 SV=1	1	14	217	0	44.409	7.52e-13	746	0.00386729	7.52e-13	2.26844	9	1	1
PF3D7_1410600	Q8ILY9	PF14_0104	tr|Q8ILY9|Q8ILY9_PLAF7 Eukaryotic translation initiation factor 2 subunit gamma, putative OS=Plasmodium falciparum (isolate 3D7) OX=36329 GN=PF3D7_1410600 PE=4 SV=1	1	19	465	0	207.23	1.11e-19	70	0.000362882	1.11e-19	4.14571	9	1	1
PF3D7_0629800	C6KTD3	PFF1445c	tr|C6KTD3|C6KTD3_PLAF7 Cullin-like protein, putative OS=Plasmodium falciparum (isolate 3D7) OX=36329 GN=PF3D7_0629800 PE=3 SV=1	1	25	1129	0	304.47	1.84e-17	186	0.00096423	1.84e-17	30.205	9	1	1
PF3D7_1032800	C6S3E1	PF10_0320a	tr|C6S3E1|C6S3E1_PLAF7 Leucine-rich repeat protein OS=Plasmodium falciparum (isolate 3D7) OX=36329 GN=PF3D7_1032800 PE=4 SV=1	1	14	309	0	318.21	1.81e-09	1161	0.00601866	1.81e-09	30.8801	9	1	1
PF3D7_0209000	A0A143ZY09;P68874	PFS230	tr|A0A143ZY09|A0A143ZY09_PLAF7 6-cysteine protein P230 OS=Plasmodium falciparum (isolate 3D7) OX=36329 GN=PF3D7_0209000 PE=4 SV=1;sp|P68874|P230_PLAF7 Gametocyte surface protein P230 OS=Plasmodium falciparum (isolate 3D7) OX=36329 GN=PFS230 PE=1 SV=1	2	67	3135	0	176.14	0.000135726	1392	0.00721617	0.000135726	1.22737	9	1	1
PF3D7_1017900	Q8IJM0	PF10_0174	tr|Q8IJM0|Q8IJM0_PLAF7 26S proteasome regulatory subunit p55, putative OS=Plasmodium falciparum (isolate 3D7) OX=36329 GN=PF3D7_1017900 PE=4 SV=1	1	16	467	0	323.31	5.28e-15	435	0.00225505	5.28e-15	5.031	9	1	1
PF3D7_1029600	Q8IJA9	PF10_0289	tr|Q8IJA9|Q8IJA9_PLAF7 Adenosine deaminase OS=Plasmodium falciparum (isolate 3D7) OX=36329 GN=PF3D7_1029600 PE=1 SV=1	1	21	367	0	137.76	0.00534641	1426	0.00739243	0.00534641	1.75884	9	1	1
PF3D7_1108400	Q8IIR9	PF11_0096	tr|Q8IIR9|Q8IIR9_PLAF7 Casein kinase 2, alpha subunit OS=Plasmodium falciparum (isolate 3D7) OX=36329 GN=PF3D7_1108400 PE=1 SV=1	1	16	335	0	248.16	6.08e-15	443	0.00229653	6.08e-15	5.18745	9	1	1
PF3D7_1012400	Q8IJS1	PF10_0121	tr|Q8IJS1|Q8IJS1_PLAF7 Hypoxanthine phosphoribosyltransferase OS=Plasmodium falciparum (isolate 3D7) OX=36329 GN=PF3D7_1012400 PE=3 SV=1	1	13	231	0	272.96	1.26e-05	1363	0.00706584	1.26e-05	1.98264	9	1	1
PF3D7_0305500	O97239	PFC0245c	sp|O97239|DOP1_PLAF7 Protein dopey homolog PFC0245c OS=Plasmodium falciparum (isolate 3D7) OX=36329 GN=PFC0245c PE=1 SV=1	1	53	3933	0	277.65	8.24e-12	864	0.00447901	8.24e-12	28.8644	9	1	1
PF3D7_0803800	Q7K6A9	MAL8P1.142	tr|Q7K6A9|Q7K6A9_PLAF7 Proteasome subunit beta OS=Plasmodium falciparum (isolate 3D7) OX=36329 GN=PF3D7_0803800 PE=1 SV=1	1	11	265	0	296.43	2.72e-11	936	0.00485225	2.72e-11	5.42356	9	1	1
PF3D7_0317600	O77381	PFC0775w	tr|O77381|O77381_PLAF7 40S ribosomal protein S11, putative OS=Plasmodium falciparum (isolate 3D7) OX=36329 GN=PF3D7_0317600 PE=1 SV=2	1	8	161	0	178.1	3.3e-07	1301	0.00674443	3.3e-07	4.368	9	1	1
PF3D7_0102900	Q8I2B1	PFA_0145c	tr|Q8I2B1|Q8I2B1_PLAF7 Aspartate--tRNA ligase OS=Plasmodium falciparum (isolate 3D7) OX=36329 GN=PF3D7_0102900 PE=3 SV=1	1	23	626	0	166.98	2.12e-18	120	0.000622084	2.12e-18	3.23185	9	1	1
PF3D7_0417200	Q8I1R6	DHFR-TS	tr|Q8I1R6|Q8I1R6_PLAF7 Bifunctional dihydrofolate reductase-thymidylate synthase OS=Plasmodium falciparum (isolate 3D7) OX=36329 GN=PF3D7_0417200 PE=3 SV=1	1	23	608	0	254.56	1.24e-18	112	0.000580612	1.24e-18	4.70239	9	1	1
PF3D7_1212000	Q8I5T2	PFL0595c	tr|Q8I5T2|Q8I5T2_PLAF7 Glutathione peroxidase OS=Plasmodium falciparum (isolate 3D7) OX=36329 GN=PF3D7_1212000 PE=3 SV=1	1	11	205	0	141.89	1.95e-14	529	0.00274235	1.95e-14	6.25708	9	1	1
PF3D7_1405600	Q8IM38	PF14_0053	tr|Q8IM38|Q8IM38_PLAF7 Ribonucleoside-diphosphate reductase small chain, putative OS=Plasmodium falciparum (isolate 3D7) OX=36329 GN=PF3D7_1405600 PE=4 SV=1	1	14	349	0	135.72	1.54e-10	1033	0.00535511	1.54e-10	5.03072	9	1	1
PF3D7_0726500	Q8IBJ1	MAL7P1.147	tr|Q8IBJ1|Q8IBJ1_PLAF7 Ubiquitin carboxyl-terminal hydrolase, putative OS=Plasmodium falciparum (isolate 3D7) OX=36329 GN=PF3D7_0726500 PE=3 SV=1	1	45	3183	0	323.31	1.95e-16	280	0.00145153	1.95e-16	28.7892	9	1	1
PF3D7_0706000	C0H4L1	MAL7P1.202	tr|C0H4L1|C0H4L1_PLAF7 Importin-7, putative OS=Plasmodium falciparum (isolate 3D7) OX=36329 GN=PF3D7_0706000 PE=4 SV=1	1	30	1229	0	323.31	1.02e-17	170	0.000881286	1.02e-17	3.91338	9	1	1
PF3D7_1132200	Q8II43	PF11_0331	tr|Q8II43|Q8II43_PLAF7 T-complex protein 1 subunit alpha OS=Plasmodium falciparum (isolate 3D7) OX=36329 GN=PF3D7_1132200 PE=3 SV=1	1	23	544	0	309.68	1.12e-22	13	6.74e-05	1.12e-22	2.78295	9	1	1
PF3D7_0810800	Q8IAU3	DHPS	tr|Q8IAU3|Q8IAU3_PLAF7 Hydroxymethyldihydropterin pyrophosphokinase-dihydropteroate synthase OS=Plasmodium falciparum (isolate 3D7) OX=36329 GN=PF3D7_0810800 PE=4 SV=1	1	37	706	0	323.31	6.23e-11	983	0.00509591	6.23e-11	5.20552	9	1	1
PF3D7_1332900	Q8IDZ9	PF13_0179	tr|Q8IDZ9|Q8IDZ9_PLAF7 Isoleucine--tRNA ligase, putative OS=Plasmodium falciparum (isolate 3D7) OX=36329 GN=PF3D7_1332900 PE=3 SV=1	1	38	1272	0	274.16	6.19e-16	334	0.00173147	6.19e-16	3.0429	9	1	1
PF3D7_1213900	A0A144A0U7		tr|A0A144A0U7|A0A144A0U7_PLAF7 W2 domain-containing protein OS=Plasmodium falciparum (isolate 3D7) OX=36329 GN=PF3D7_1213900 PE=4 SV=1	1	29	1137	0	323.31	2.96e-17	205	0.00106273	2.96e-17	5.80228	9	1	1
PF3D7_1026800	A0A143ZZG2;Q8IJD4	PF10_0264	tr|A0A143ZZG2|A0A143ZZG2_PLAF7 40S ribosomal protein SA OS=Plasmodium falciparum (isolate 3D7) OX=36329 GN=PF3D7_1026800 PE=3 SV=1;sp|Q8IJD4|RSSA_PLAF7 40S ribosomal protein SA OS=Plasmodium falciparum (isolate 3D7) OX=36329 GN=PF10_0264 PE=1 SV=1	2	13	263	0	235.57	2.86e-13	690	0.00357698	2.86e-13	2.87416	9	1	1
PF3D7_1242700	Q8I502	PFL2055w	tr|Q8I502|Q8I502_PLAF7 40S ribosomal protein S17, putative OS=Plasmodium falciparum (isolate 3D7) OX=36329 GN=PF3D7_1242700 PE=1 SV=1	1	11	137	0	69.959	2.27e-13	676	0.00350441	2.27e-13	3.74842	9	1	1
PF3D7_0209800	Q9TY94	UAP56	tr|Q9TY94|Q9TY94_PLAF7 ATP-dependent RNA helicase UAP56 OS=Plasmodium falciparum (isolate 3D7) OX=36329 GN=PF3D7_0209800 PE=4 SV=1	1	21	457	0	323.31	1.95e-12	797	0.00413167	1.95e-12	3.49227	9	1	1
PF3D7_1132300	Q8II42	PF11_0332	tr|Q8II42|Q8II42_PLAF7 Nucleic acid binding protein, putative OS=Plasmodium falciparum (isolate 3D7) OX=36329 GN=PF3D7_1132300 PE=4 SV=1	1	9	273	0	225.66	1.99e-07	1293	0.00670296	1.99e-07	6.29139	9	1	1
PF3D7_0422700	Q8IFN9	PFD1070w	tr|Q8IFN9|Q8IFN9_PLAF7 Eukaryotic initiation factor 4A-III, putative OS=Plasmodium falciparum (isolate 3D7) OX=36329 GN=PF3D7_0422700 PE=3 SV=1	1	10	390	0	131.39	2.5e-13	682	0.00353551	2.5e-13	4.8315	9	1	1
PF3D7_1106000	Q8IIU3	PF11_0071	tr|Q8IIU3|Q8IIU3_PLAF7 RuvB-like helicase OS=Plasmodium falciparum (isolate 3D7) OX=36329 GN=PF3D7_1106000 PE=3 SV=1	1	21	475	0	323.31	3.33e-11	945	0.00489891	3.33e-11	5.69126	9	1	1
PF3D7_0520900	P50250	PFE1050w	sp|P50250|SAHH_PLAF7 Adenosylhomocysteinase OS=Plasmodium falciparum (isolate 3D7) OX=36329 GN=PFE1050w PE=1 SV=2	1	18	479	0	275.46	3.56e-11	946	0.00490409	3.56e-11	2.45263	9	1	1
PF3D7_0321500	O97289	PFC0950c	tr|O97289|O97289_PLAF7 Peptidase, putative OS=Plasmodium falciparum (isolate 3D7) OX=36329 GN=PF3D7_0321500 PE=4 SV=2	1	22	1074	0	282.42	1.82e-12	792	0.00410575	1.82e-12	29.2959	9	1	1
PF3D7_0920800	Q8I2U5	PFI1020c	tr|Q8I2U5|Q8I2U5_PLAF7 Inosine-5-monophosphate dehydrogenase OS=Plasmodium falciparum (isolate 3D7) OX=36329 GN=PF3D7_0920800 PE=3 SV=1	1	20	510	0	323.31	1.1e-11	883	0.0045775	1.1e-11	4.20814	9	1	1
PF3D7_0516200	A0A5K1K925		tr|A0A5K1K925|A0A5K1K925_PLAF7 40S ribosomal protein S11 OS=Plasmodium falciparum (isolate 3D7) OX=36329 GN=PF3D7_0516200 PE=3 SV=1	1	10	151	0	61.058	2.68e-12	814	0.0042198	2.68e-12	4.12882	9	1	1
PF3D7_1460700	Q8IKM5	PF14_0579	tr|Q8IKM5|Q8IKM5_PLAF7 60S ribosomal protein L27 OS=Plasmodium falciparum (isolate 3D7) OX=36329 GN=PF3D7_1460700 PE=1 SV=2	1	9	146	0	50.665	8.01e-17	246	0.00127527	8.01e-17	3.34681	9	1	1
PF3D7_1408600	Q8IM10	PF14_0083	tr|Q8IM10|Q8IM10_PLAF7 40S ribosomal protein S8 OS=Plasmodium falciparum (isolate 3D7) OX=36329 GN=PF3D7_1408600 PE=1 SV=1	1	8	218	0	212.34	1.28e-20	47	0.00024365	1.28e-20	3.18651	9	1	1
PF3D7_1130400	Q8II60	PF11_0314	tr|Q8II60|Q8II60_PLAF7 26S protease regulatory subunit 6A, putative OS=Plasmodium falciparum (isolate 3D7) OX=36329 GN=PF3D7_1130400 PE=3 SV=1	1	16	439	0	270.62	7.48e-17	241	0.00124935	7.48e-17	5.00885	9	1	1
PF3D7_0406100	Q6ZMA8	PFD0305c	tr|Q6ZMA8|Q6ZMA8_PLAF7 Vacuolar proton pump subunit B OS=Plasmodium falciparum (isolate 3D7) OX=36329 GN=PF3D7_0406100 PE=3 SV=1	1	21	494	0	314.9	9.57e-14	635	0.00329186	9.57e-14	3.78243	9	1	1
PF3D7_0108000	Q8I261	PFA_0400c	tr|Q8I261|Q8I261_PLAF7 Proteasome subunit beta OS=Plasmodium falciparum (isolate 3D7) OX=36329 GN=PF3D7_0108000 PE=1 SV=2	1	7	218	0	130.23	7.92e-12	860	0.00445827	7.92e-12	5.70319	9	1	1
PF3D7_0812400	Q8IAW0	PF08_0087	tr|Q8IAW0|Q8IAW0_PLAF7 Importin subunit alpha OS=Plasmodium falciparum (isolate 3D7) OX=36329 GN=PF3D7_0812400 PE=3 SV=1	1	14	545	0	277.79	1.58e-12	784	0.00406428	1.58e-12	4.04924	9	1	1
PF3D7_0931800	Q8I0U7	PFI1545c	tr|Q8I0U7|Q8I0U7_PLAF7 Proteasome subunit beta type-6, putative OS=Plasmodium falciparum (isolate 3D7) OX=36329 GN=PF3D7_0931800 PE=1 SV=1	1	8	282	0	121.73	3.66e-17	217	0.00112494	3.66e-17	31.186	9	1	1
PF3D7_0903200	C0H516	Rab7	tr|C0H516|C0H516_PLAF7 Ras-related protein RAB7 OS=Plasmodium falciparum (isolate 3D7) OX=36329 GN=PF3D7_0903200 PE=4 SV=1	1	15	206	0	323.31	2.27e-15	396	0.00205288	2.27e-15	4.29479	9	1	1
PF3D7_1445100	Q8IL22	PF14_0428	tr|Q8IL22|Q8IL22_PLAF7 Histidine--tRNA ligase, putative OS=Plasmodium falciparum (isolate 3D7) OX=36329 GN=PF3D7_1445100 PE=4 SV=1	1	34	1132	0	114.47	1.96e-21	29	0.000150337	1.96e-21	4.05903	9	1	1
PF3D7_1033100	Q8IJ77	PF10_0322	tr|Q8IJ77|Q8IJ77_PLAF7 S-adenosylmethionine decarboxylase/ornithine decarboxylase OS=Plasmodium falciparum (isolate 3D7) OX=36329 GN=PF3D7_1033100 PE=4 SV=1	1	37	1434	0	281.52	2.61e-13	685	0.00355106	2.61e-13	4.62142	9	1	1
PF3D7_0721600	Q8IBN5	PF07_0088	tr|Q8IBN5|Q8IBN5_PLAF7 40S ribosomal protein S5, putative OS=Plasmodium falciparum (isolate 3D7) OX=36329 GN=PF3D7_0721600 PE=1 SV=1	1	10	195	0	323.31	0.000875842	1412	0.00731986	0.000875842	3.89422	9	1	1
PF3D7_1350100	Q8IDJ8	PF13_0262	tr|Q8IDJ8|Q8IDJ8_PLAF7 Lysine--tRNA ligase OS=Plasmodium falciparum (isolate 3D7) OX=36329 GN=PF3D7_1350100 PE=1 SV=1	1	19	583	0	192.06	7.53e-15	458	0.00237429	7.53e-15	3.6703	9	1	1
PF3D7_1331800	Q8IE09	PF13_0171	tr|Q8IE09|Q8IE09_PLAF7 60S ribosomal protein L23, putative OS=Plasmodium falciparum (isolate 3D7) OX=36329 GN=PF3D7_1331800 PE=1 SV=1	1	6	139	0	120.3	3.06e-11	942	0.00488336	3.06e-11	4.69037	9	1	1
PF3D7_1213800	A0A144A0G8;Q8I5R7	proRS	tr|A0A144A0G8|A0A144A0G8_PLAF7 Proline--tRNA ligase OS=Plasmodium falciparum (isolate 3D7) OX=36329 GN=PF3D7_1213800 PE=3 SV=1;sp|Q8I5R7|SYP_PLAF7 Proline--tRNA ligase OS=Plasmodium falciparum (isolate 3D7) OX=36329 GN=proRS PE=1 SV=1	2	29	746	0	272.83	5.24e-11	974	0.00504925	5.24e-11	3.78607	9	1	1
PF3D7_0613800	C6KSY0	ApiAP2	tr|C6KSY0|C6KSY0_PLAF7 AP2 domain transcription factor, putative OS=Plasmodium falciparum (isolate 3D7) OX=36329 GN=PF3D7_0613800 PE=4 SV=1	1	41	4109	0	323.31	3.82e-09	1196	0.0062001	3.82e-09	28.1501	9	1	1
PF3D7_1250300	A0A144A4V4;Q8I4T1	PFL2415w	tr|A0A144A4V4|A0A144A4V4_PLAF7 Vacuolar protein sorting-associated protein 26, putative OS=Plasmodium falciparum (isolate 3D7) OX=36329 GN=PF3D7_1250300 PE=4 SV=1;sp|Q8I4T1|VPS26_PLAF7 Vacuolar protein sorting-associated protein 26 OS=Plasmodium falciparum	2	14	297	0	111.43	7.65e-13	750	0.00388802	7.65e-13	6.73051	9	1	1
PF3D7_0814200	Q8IAX8	PF08_0074	tr|Q8IAX8|Q8IAX8_PLAF7 DNA/RNA-binding protein Alba 1 OS=Plasmodium falciparum (isolate 3D7) OX=36329 GN=PF3D7_0814200 PE=4 SV=1	1	13	248	0	70.183	3.01e-07	1298	0.00672887	3.01e-07	2.82304	9	1	1
PF3D7_1119900	Q8IIG8	PF11_0206	tr|Q8IIG8|Q8IIG8_PLAF7 Protein transport protein SEC16, putative OS=Plasmodium falciparum (isolate 3D7) OX=36329 GN=PF3D7_1119900 PE=4 SV=1	1	25	1749	0	323.31	8.86e-15	474	0.00245723	8.86e-15	29.298	9	1	1
PF3D7_1338200	A0A5K1K8V8		tr|A0A5K1K8V8|A0A5K1K8V8_PLAF7 60S ribosomal protein L6, putative OS=Plasmodium falciparum (isolate 3D7) OX=36329 GN=PF3D7_1338200 PE=4 SV=1	1	11	221	0	79.193	1.59e-08	1240	0.0064282	1.59e-08	2.26461	9	1	1
PF3D7_1136500.2	C6S3F7;A0A144A308;Q8IHZ9	PfCK1;CK1	tr|C6S3F7|C6S3F7_PLAF7 Casein kinase 1 OS=Plasmodium falciparum (isolate 3D7) OX=36329 GN=PF3D7_1136500.2 PE=3 SV=1;tr|A0A144A308|A0A144A308_PLAF7 Casein kinase 1 OS=Plasmodium falciparum (isolate 3D7) OX=36329 GN=PF3D7_1136500.1 PE=3 SV=1;sp|Q8IHZ9|KC1_PL	3	12	324	0	77.525	3.4e-18	135	0.000699844	3.4e-18	4.72031	9	1	1
PF3D7_1349200	Q8IDK7	PF13_0257	tr|Q8IDK7|Q8IDK7_PLAF7 Glutamate--tRNA ligase, putative OS=Plasmodium falciparum (isolate 3D7) OX=36329 GN=PF3D7_1349200 PE=3 SV=1	1	33	863	0	132.11	8.44e-17	249	0.00129082	8.44e-17	3.79653	9	1	1
PF3D7_1462100	Q8IKL3	PF14_0591	tr|Q8IKL3|Q8IKL3_PLAF7 Uncharacterized protein OS=Plasmodium falciparum (isolate 3D7) OX=36329 GN=PF3D7_1462100 PE=4 SV=1	1	29	1334	0	238.61	1.49e-16	272	0.00141006	1.49e-16	28.5741	9	1	1
PF3D7_0728000	Q8IBH7	PF07_0117	tr|Q8IBH7|Q8IBH7_PLAF7 Eukaryotic translation initiation factor 2 subunit alpha OS=Plasmodium falciparum (isolate 3D7) OX=36329 GN=PF3D7_0728000 PE=4 SV=1	1	16	329	0	102.46	1.07e-14	484	0.00250907	1.07e-14	4.12146	9	1	1
PF3D7_0303000	O77313	PFC0140c	tr|O77313|O77313_PLAF7 N-ethylmaleimide-sensitive fusion protein OS=Plasmodium falciparum (isolate 3D7) OX=36329 GN=PF3D7_0303000 PE=4 SV=1	1	21	783	0	298.61	1.38e-15	372	0.00192846	1.38e-15	4.93098	9	1	1
PF3D7_0507100	Q8I431	PFE0350c	tr|Q8I431|Q8I431_PLAF7 60S ribosomal protein L4 OS=Plasmodium falciparum (isolate 3D7) OX=36329 GN=PF3D7_0507100 PE=1 SV=1	1	18	411	0	194.99	3.28e-09	1188	0.00615863	3.28e-09	2.18566	9	1	1
PF3D7_1344700	A0A5K1K8X4		tr|A0A5K1K8X4|A0A5K1K8X4_PLAF7 Uncharacterized protein OS=Plasmodium falciparum (isolate 3D7) OX=36329 GN=PF3D7_1344700 PE=4 SV=1	1	28	1244	0	163.23	4.94e-18	144	0.000746501	4.94e-18	28.9167	9	1	1
PF3D7_0905900	Q8I390	PFI0290c	tr|Q8I390|Q8I390_PLAF7 Coatomer subunit beta OS=Plasmodium falciparum (isolate 3D7) OX=36329 GN=PF3D7_0905900 PE=3 SV=1	1	27	1010	0	260.47	1.38e-18	115	0.000596164	1.38e-18	4.5562	9	1	1
PF3D7_0513300	Q8I3X4	PFE0660c	tr|Q8I3X4|Q8I3X4_PLAF7 Purine nucleoside phosphorylase OS=Plasmodium falciparum (isolate 3D7) OX=36329 GN=PF3D7_0513300 PE=1 SV=1	1	17	245	0	158.2	8.66e-06	1356	0.00702955	8.66e-06	1.68078	9	1	1
PF3D7_0505100	Q8I451	PFE0250w	tr|Q8I451|Q8I451_PLAF7 Trafficking protein particle complex subunit 8, putative OS=Plasmodium falciparum (isolate 3D7) OX=36329 GN=PF3D7_0505100 PE=4 SV=1	1	46	2754	0	323.31	5.28e-14	589	0.0030534	5.28e-14	28.3739	9	1	1
PF3D7_1008400	Q8IJW0	PF10_0081	tr|Q8IJW0|Q8IJW0_PLAF7 26S protease regulatory subunit 4, putative OS=Plasmodium falciparum (isolate 3D7) OX=36329 GN=PF3D7_1008400 PE=3 SV=2	1	17	448	0	323.31	6.21e-23	9	4.67e-05	6.21e-23	5.3279	9	1	1
PF3D7_1206200	Q8I5Y3	PFL0310c	tr|Q8I5Y3|Q8I5Y3_PLAF7 Eukaryotic translation initiation factor 3 subunit C OS=Plasmodium falciparum (isolate 3D7) OX=36329 GN=PF3D7_1206200 PE=3 SV=1	1	29	984	0	323.31	2.53e-16	289	0.00149819	2.53e-16	3.60963	9	1	1
PF3D7_1419300	A0A144A1J6;Q8ILQ7	GST	tr|A0A144A1J6|A0A144A1J6_PLAF7 Glutathione S-transferase OS=Plasmodium falciparum (isolate 3D7) OX=36329 GN=PF3D7_1419300 PE=3 SV=1;sp|Q8ILQ7|GST_PLAF7 Glutathione S-transferase OS=Plasmodium falciparum (isolate 3D7) OX=36329 GN=GST PE=3 SV=1	2	9	211	0	167.41	1.47e-09	1152	0.00597201	1.47e-09	5.63815	9	1	1
PF3D7_1027800	Q8IJC6	PF10_0272	tr|Q8IJC6|Q8IJC6_PLAF7 60S ribosomal protein L3 OS=Plasmodium falciparum (isolate 3D7) OX=36329 GN=PF3D7_1027800 PE=1 SV=1	1	11	386	0	74.708	2.54e-15	406	0.00210472	2.54e-15	3.38238	9	1	1
PF3D7_1006200	Q8IJX8	PF10_0063	tr|Q8IJX8|Q8IJX8_PLAF7 DNA/RNA-binding protein Alba 3 OS=Plasmodium falciparum (isolate 3D7) OX=36329 GN=PF3D7_1006200 PE=4 SV=1	1	9	107	0	173.07	5.24e-05	1385	0.00717989	5.24e-05	2.13506	9	1	1
PF3D7_1107800	Q8IIS4	PF11_0091	tr|Q8IIS4|Q8IIS4_PLAF7 AP2 domain transcription factor, putative OS=Plasmodium falciparum (isolate 3D7) OX=36329 GN=PF3D7_1107800 PE=4 SV=1	1	23	1828	0	323.31	2.23e-07	1296	0.00671851	2.23e-07	29.3953	9	1	1
PF3D7_1231100	Q8I5A9	Rab2	tr|Q8I5A9|Q8I5A9_PLAF7 Ras-related protein Rab-2 OS=Plasmodium falciparum (isolate 3D7) OX=36329 GN=PF3D7_1231100 PE=4 SV=1	1	15	213	0	93.413	1.1e-16	256	0.00132711	1.1e-16	3.46776	9	1	1
PF3D7_1034900	Q8IJ60	PF10_0340	tr|Q8IJ60|Q8IJ60_PLAF7 Methionine--tRNA ligase OS=Plasmodium falciparum (isolate 3D7) OX=36329 GN=PF3D7_1034900 PE=3 SV=1	1	29	889	0	282.86	1.13e-17	173	0.000896838	1.13e-17	3.55052	9	1	1
PF3D7_1353800	Q8IDG3;Q8I5J4	PF13_0282	tr|Q8IDG3|Q8IDG3_PLAF7 Proteasome subunit alpha type OS=Plasmodium falciparum (isolate 3D7) OX=36329 GN=PF3D7_1353800 PE=1 SV=1	2	9	246	0	120.31	1.07e-11	881	0.00456713	1.07e-11	5.37649	9	1	1
PF3D7_0214000	O96220	PFB0635w	tr|O96220|O96220_PLAF7 T-complex protein 1 subunit theta OS=Plasmodium falciparum (isolate 3D7) OX=36329 GN=PF3D7_0214000 PE=3 SV=3	1	21	542	0	137.72	2.21e-23	4	2.07e-05	2.21e-23	3.5101	9	1	1
PF3D7_0320300	O97282	PFC0900w	tr|O97282|O97282_PLAF7 T-complex protein 1 subunit epsilon OS=Plasmodium falciparum (isolate 3D7) OX=36329 GN=PF3D7_0320300 PE=3 SV=1	1	24	535	0	229.02	1.1e-13	642	0.00332815	1.1e-13	2.92106	9	1	1
PF3D7_0903400	Q8I3B4	PFI0165c	tr|Q8I3B4|Q8I3B4_PLAF7 ATP-dependent RNA helicase DDX60, putative OS=Plasmodium falciparum (isolate 3D7) OX=36329 GN=PF3D7_0903400 PE=4 SV=1	1	47	2536	0	294.65	4.31e-15	428	0.00221877	4.31e-15	5.05407	9	1	1
PF3D7_0511500	Q8I3Z1	PFE0570w	sp|Q8I3Z1|MLRR1_PLAF7 MATH and LRR domain-containing protein PFE0570w OS=Plasmodium falciparum (isolate 3D7) OX=36329 GN=PFE0570w PE=1 SV=1	1	80	10061	0	204.13	8.21e-16	345	0.00178849	8.21e-16	27.8132	9	1	1
PF3D7_0722400	Q8IBM9	MAL7P1.122	tr|Q8IBM9|Q8IBM9_PLAF7 Obg-like ATPase 1 OS=Plasmodium falciparum (isolate 3D7) OX=36329 GN=PF3D7_0722400 PE=3 SV=1	1	18	393	0	48.135	7.65e-15	459	0.00237947	7.65e-15	3.4796	9	1	1
PF3D7_1225800	Q8I5F9	PFL1245w	tr|Q8I5F9|Q8I5F9_PLAF7 Ubiquitin-activating enzyme E1 OS=Plasmodium falciparum (isolate 3D7) OX=36329 GN=PF3D7_1225800 PE=4 SV=1	1	34	1140	0	323.31	7.5e-15	457	0.0023691	7.5e-15	3.20192	9	1	1
PF3D7_0932800	Q8I2I8	PFI1590c	tr|Q8I2I8|Q8I2I8_PLAF7 Importin alpha re-exporter, putative OS=Plasmodium falciparum (isolate 3D7) OX=36329 GN=PF3D7_0932800 PE=4 SV=1	1	27	1342	0	242.09	1.93e-21	28	0.000145153	1.93e-21	3.96383	9	1	1
PF3D7_1310700	Q8IEK9	PF13_0058	tr|Q8IEK9|Q8IEK9_PLAF7 RNA-binding protein, putative OS=Plasmodium falciparum (isolate 3D7) OX=36329 GN=PF3D7_1310700 PE=4 SV=1	1	2	143	0	20.582	5.16e-05	1384	0.0071747	5.16e-05	6.352	9	1	1
PF3D7_1414300	Q8ILV2	PF14_0141	tr|Q8ILV2|Q8ILV2_PLAF7 60S ribosomal protein L10, putative OS=Plasmodium falciparum (isolate 3D7) OX=36329 GN=PF3D7_1414300 PE=1 SV=1	1	4	219	0	306.95	1.09e-07	1281	0.00664075	1.09e-07	5.13826	9	1	1
PF3D7_0217900	O96259	PFB0835c	tr|O96259|O96259_PLAF7 Uncharacterized protein OS=Plasmodium falciparum (isolate 3D7) OX=36329 GN=PF3D7_0217900 PE=4 SV=1	1	13	519	0	107.68	1.25e-11	889	0.0046086	1.25e-11	4.53582	9	1	1
PF3D7_0919000	Q8I2W3	PFI0930c	tr|Q8I2W3|Q8I2W3_PLAF7 Nucleosome assembly protein OS=Plasmodium falciparum (isolate 3D7) OX=36329 GN=PF3D7_0919000 PE=3 SV=1	1	10	269	0	65.75	1.19e-09	1143	0.00592535	1.19e-09	3.04659	9	1	1
PF3D7_1242600	Q8I503	PFL2050w	tr|Q8I503|Q8I503_PLAF7 Protein farnesyltransferase subunit alpha OS=Plasmodium falciparum (isolate 3D7) OX=36329 GN=PF3D7_1242600 PE=4 SV=2	1	15	521	0	117.27	1.09e-14	486	0.00251944	1.09e-14	29.7278	9	1	1
PF3D7_0307100	O97249	RPS12	sp|O97249|RS12_PLAF7 40S ribosomal protein S12 OS=Plasmodium falciparum (isolate 3D7) OX=36329 GN=RPS12 PE=1 SV=1	1	10	141	0	164.12	2.02e-11	917	0.00475376	2.02e-11	2.47471	9	1	1
PF3D7_1317800	C0H5C2	MAL13P1.92	tr|C0H5C2|C0H5C2_PLAF7 40S ribosomal protein S19 OS=Plasmodium falciparum (isolate 3D7) OX=36329 GN=PF3D7_1317800 PE=1 SV=1	1	5	145	0	52.369	1.2e-05	1361	0.00705547	1.2e-05	4.47846	9	1	1
PF3D7_1347500	A0A5K1K8Y8		tr|A0A5K1K8Y8|A0A5K1K8Y8_PLAF7 DNA/RNA-binding protein Alba 4 OS=Plasmodium falciparum (isolate 3D7) OX=36329 GN=PF3D7_1347500 PE=4 SV=1	1	13	372	0	127.54	4.06e-10	1084	0.00561949	4.06e-10	2.45993	9	1	1
PF3D7_0422500	Q8IFP1	PFD1060w	tr|Q8IFP1|Q8IFP1_PLAF7 Pre-mRNA-splicing helicase BRR2, putative OS=Plasmodium falciparum (isolate 3D7) OX=36329 GN=PF3D7_0422500 PE=4 SV=1	1	50	2874	0	306.17	1.3e-15	369	0.00191291	1.3e-15	5.02201	9	1	1
PF3D7_0525100	Q8I3L4	PfACS10	tr|Q8I3L4|Q8I3L4_PLAF7 Acyl-CoA synthetase OS=Plasmodium falciparum (isolate 3D7) OX=36329 GN=PF3D7_0525100 PE=4 SV=1	1	24	673	0	199.41	1.62e-09	1155	0.00598756	1.62e-09	3.24441	9	1	1
PF3D7_0520200	Q8I3Q8	PFE1015c	tr|Q8I3Q8|Q8I3Q8_PLAF7 Mediator of RNA polymerase II transcription subunit 17, putative OS=Plasmodium falciparum (isolate 3D7) OX=36329 GN=PF3D7_0520200 PE=4 SV=1	1	21	697	0	155.02	3.83e-10	1081	0.00560394	3.83e-10	29.1925	9	1	1
PF3D7_1426800	Q8ILJ6	PF14_0247	tr|Q8ILJ6|Q8ILJ6_PLAF7 Uncharacterized protein OS=Plasmodium falciparum (isolate 3D7) OX=36329 GN=PF3D7_1426800 PE=4 SV=2	1	35	2082	0	213.05	3.65e-13	706	0.00365993	3.65e-13	28.6767	9	1	1
PF3D7_1103100	Q8IIX0	PF11_0043	tr|Q8IIX0|Q8IIX0_PLAF7 60S acidic ribosomal protein P1, putative OS=Plasmodium falciparum (isolate 3D7) OX=36329 GN=PF3D7_1103100 PE=3 SV=1	1	10	118	0	323.31	1.14e-11	885	0.00458787	1.14e-11	3.3846	9	1	1
PF3D7_0415900	C0H4A6	PFD0770c	tr|C0H4A6|C0H4A6_PLAF7 Ribosomal protein L15 OS=Plasmodium falciparum (isolate 3D7) OX=36329 GN=PF3D7_0415900 PE=1 SV=1	1	7	205	0	51.38	1.11e-09	1142	0.00592017	1.11e-09	3.93256	9	1	1
PF3D7_1432100	Q8ILE3	PF14_0301	tr|Q8ILE3|Q8ILE3_PLAF7 Voltage-dependent anion-selective channel protein, putative OS=Plasmodium falciparum (isolate 3D7) OX=36329 GN=PF3D7_1432100 PE=4 SV=1	1	15	289	0	171.35	6.13e-12	849	0.00440124	6.13e-12	1.66427	9	1	1
PF3D7_1306400	Q8IEQ1	PF13_0033	tr|Q8IEQ1|Q8IEQ1_PLAF7 26S protease regulatory subunit 10B, putative OS=Plasmodium falciparum (isolate 3D7) OX=36329 GN=PF3D7_1306400 PE=3 SV=1	1	22	393	0	262.22	3.53e-09	1191	0.00617418	3.53e-09	4.89856	9	1	1
PF3D7_1344100	C0H5G9	MAL13P1.395	tr|C0H5G9|C0H5G9_PLAF7 TLD domain-containing protein, putative OS=Plasmodium falciparum (isolate 3D7) OX=36329 GN=PF3D7_1344100 PE=4 SV=1	1	21	805	0	307.71	3.77e-15	424	0.00219803	3.77e-15	28.9602	9	1	1
PF3D7_1203700	Q8I608	PFL0185c	tr|Q8I608|Q8I608_PLAF7 Nucleosome assembly protein OS=Plasmodium falciparum (isolate 3D7) OX=36329 GN=PF3D7_1203700 PE=1 SV=2	1	13	347	0	141.39	1.88e-14	525	0.00272162	1.88e-14	3.92655	9	1	1
PF3D7_1238800	Q8I535	PFL1880w	tr|Q8I535|Q8I535_PLAF7 Acyl-CoA synthetase OS=Plasmodium falciparum (isolate 3D7) OX=36329 GN=PF3D7_1238800 PE=4 SV=1	1	21	792	0	78.519	8.28e-15	466	0.00241576	8.28e-15	4.43412	9	1	1
PF3D7_1464700	Q8IKJ0	PF14_0615	tr|Q8IKJ0|Q8IKJ0_PLAF7 V-type proton ATPase subunit OS=Plasmodium falciparum (isolate 3D7) OX=36329 GN=PF3D7_1464700 PE=3 SV=1	1	22	382	0	191.27	1.15e-06	1324	0.00686366	1.15e-06	1.63853	9	1	1
PF3D7_1126100	Q8IIA3	PF11_0271	tr|Q8IIA3|Q8IIA3_PLAF7 Autophagy-related protein 7, putative OS=Plasmodium falciparum (isolate 3D7) OX=36329 GN=PF3D7_1126100 PE=4 SV=1	1	29	1316	0	208.1	2.98e-13	694	0.00359772	2.98e-13	28.2134	9	1	1
PF3D7_0422400	Q8IFP2	PFD1055w	tr|Q8IFP2|Q8IFP2_PLAF7 40S ribosomal protein S19 OS=Plasmodium falciparum (isolate 3D7) OX=36329 GN=PF3D7_0422400 PE=1 SV=1	1	11	170	0	183.48	6.55e-12	855	0.00443235	6.55e-12	2.84921	9	1	1
PF3D7_1441400	Q8IL56	PF14_0393	tr|Q8IL56|Q8IL56_PLAF7 FACT complex subunit SSRP1 OS=Plasmodium falciparum (isolate 3D7) OX=36329 GN=PF3D7_1441400 PE=3 SV=1	1	18	506	0	98.14	7.42e-21	44	0.000228097	7.42e-21	4.14372	9	1	1
PF3D7_1129200	Q8II71	PF11_0303	tr|Q8II71|Q8II71_PLAF7 26S proteasome regulatory subunit RPN7, putative OS=Plasmodium falciparum (isolate 3D7) OX=36329 GN=PF3D7_1129200 PE=4 SV=2	1	12	393	0	291.15	2.22e-10	1049	0.00543805	2.22e-10	4.43293	9	1	1
PF3D7_1136300	Q8II01	TSN	tr|Q8II01|Q8II01_PLAF7 Tudor staphylococcal nuclease OS=Plasmodium falciparum (isolate 3D7) OX=36329 GN=PF3D7_1136300 PE=4 SV=1	1	33	1098	0	228.76	1.41e-16	268	0.00138932	1.41e-16	3.61364	9	1	1
PF3D7_1011400	Q8IJT1	PF10_0111	tr|Q8IJT1|Q8IJT1_PLAF7 Proteasome subunit beta OS=Plasmodium falciparum (isolate 3D7) OX=36329 GN=PF3D7_1011400 PE=1 SV=1	1	9	271	0	188.44	6.14e-11	981	0.00508554	6.14e-11	6.01881	9	1	1
PF3D7_0315100	O97266	PFC0635c	tr|O97266|O97266_PLAF7 Eukaryotic translation initiation factor 4E OS=Plasmodium falciparum (isolate 3D7) OX=36329 GN=PF3D7_0315100 PE=3 SV=1	1	9	227	0	36.659	1.51e-16	273	0.00141524	1.51e-16	4.78424	9	1	1
PF3D7_1414400	Q8ILV1	PP1	tr|Q8ILV1|Q8ILV1_PLAF7 Serine/threonine-protein phosphatase OS=Plasmodium falciparum (isolate 3D7) OX=36329 GN=PF3D7_1414400 PE=1 SV=1	1	14	304	0	100.61	1.43e-12	781	0.00404873	1.43e-12	5.08629	9	1	1
PF3D7_0813300	C0H4U4	MAL8P1.95	tr|C0H4U4|C0H4U4_PLAF7 NPL domain-containing protein OS=Plasmodium falciparum (isolate 3D7) OX=36329 GN=PF3D7_0813300 PE=4 SV=1	1	9	315	0	102.25	2.03e-12	799	0.00414204	2.03e-12	2.92086	9	1	1
PF3D7_1417800	Q8ILR7;A0A5K1K9E4	PF14_0177	tr|Q8ILR7|Q8ILR7_PLAF7 DNA helicase OS=Plasmodium falciparum (isolate 3D7) OX=36329 GN=PF3D7_1417800 PE=3 SV=1	2	29	971	0	290.21	7.06e-17	239	0.00123898	7.06e-17	3.69961	9	1	1
PF3D7_1419700	Q8ILQ3	PF14_0191	tr|Q8ILQ3|Q8ILQ3_PLAF7 Uncharacterized protein OS=Plasmodium falciparum (isolate 3D7) OX=36329 GN=PF3D7_1419700 PE=4 SV=1	1	13	509	0	268.52	1.64e-14	513	0.00265941	1.64e-14	4.53056	9	1	1
PF3D7_1436000	Q8ILA4	PF14_0341	tr|Q8ILA4|Q8ILA4_PLAF7 Glucose-6-phosphate isomerase OS=Plasmodium falciparum (isolate 3D7) OX=36329 GN=PF3D7_1436000 PE=1 SV=1	1	23	579	0	323.31	1.03e-08	1229	0.00637118	1.03e-08	2.40797	9	1	1
PF3D7_1229500	Q8I5C4	PFL1425w	tr|Q8I5C4|Q8I5C4_PLAF7 T-complex protein 1 subunit gamma OS=Plasmodium falciparum (isolate 3D7) OX=36329 GN=PF3D7_1229500 PE=3 SV=1	1	26	542	0	127.25	1.83e-16	278	0.00144116	1.83e-16	2.62236	9	1	1
PF3D7_0719600	Q8IBQ6	PF07_0079	tr|Q8IBQ6|Q8IBQ6_PLAF7 60S ribosomal protein L11a, putative OS=Plasmodium falciparum (isolate 3D7) OX=36329 GN=PF3D7_0719600 PE=1 SV=1	1	6	173	0	61.685	3.46e-16	303	0.00157076	3.46e-16	2.89223	9	1	1
PF3D7_1426100	Q8ILK2	PF14_0241	tr|Q8ILK2|Q8ILK2_PLAF7 Nascent polypeptide-associated complex subunit beta OS=Plasmodium falciparum (isolate 3D7) OX=36329 GN=PF3D7_1426100 PE=3 SV=1	1	7	171	0	87.452	7.44e-13	745	0.0038621	7.44e-13	3.65738	9	1	1
PF3D7_0503400	Q8I467	PFE0165w	sp|Q8I467|CADF1_PLAF7 Cofilin/actin-depolymerizing factor homolog 1 OS=Plasmodium falciparum (isolate 3D7) OX=36329 GN=PFE0165w PE=1 SV=1	1	6	122	0	323.31	7.32e-12	858	0.0044479	7.32e-12	3.59055	9	1	1
PF3D7_0303200	O77317	PFC0150w	tr|O77317|O77317_PLAF7 HAD superfamily protein, putative OS=Plasmodium falciparum (isolate 3D7) OX=36329 GN=PF3D7_0303200 PE=4 SV=4	1	14	1162	0	90.626	1.8e-14	522	0.00270607	1.8e-14	6.16219	9	1	1
PF3D7_0516700	Q8I3U1	PFE0835w	tr|Q8I3U1|Q8I3U1_PLAF7 Ubiquitin carboxyl-terminal hydrolase 2, putative OS=Plasmodium falciparum (isolate 3D7) OX=36329 GN=PF3D7_0516700 PE=3 SV=1	1	24	1332	0	323.31	5.14e-14	584	0.00302747	5.14e-14	28.4361	9	1	1
PF3D7_0703500	Q8IC35	MAL7P1.12	tr|Q8IC35|Q8IC35_PLAF7 Erythrocyte membrane-associated antigen OS=Plasmodium falciparum (isolate 3D7) OX=36329 GN=PF3D7_0703500 PE=4 SV=2	1	39	2299	0	221.87	2.8e-14	549	0.00284603	2.8e-14	3.19513	9	1	1
PF3D7_1020900	A0A143ZY58;Q7KQL3	ARF1	tr|A0A143ZY58|A0A143ZY58_PLAF7 ADP-ribosylation factor OS=Plasmodium falciparum (isolate 3D7) OX=36329 GN=PF3D7_1020900 PE=3 SV=1;sp|Q7KQL3|ARF1_PLAF7 ADP-ribosylation factor 1 OS=Plasmodium falciparum (isolate 3D7) OX=36329 GN=ARF1 PE=1 SV=1	2	10	181	0	76.943	8.9e-12	872	0.00452048	8.9e-12	3.18181	9	1	1
PF3D7_0416800	Q8I1S0	sar1	tr|Q8I1S0|Q8I1S0_PLAF7 Small GTP-binding protein sar1 OS=Plasmodium falciparum (isolate 3D7) OX=36329 GN=PF3D7_0416800 PE=3 SV=1	1	8	192	0	126.99	2.06e-21	31	0.000160705	2.06e-21	3.87374	9	1	1
PF3D7_1345800	A0A5K1K976		tr|A0A5K1K976|A0A5K1K976_PLAF7 Uncharacterized protein OS=Plasmodium falciparum (isolate 3D7) OX=36329 GN=PF3D7_1345800 PE=4 SV=1	1	21	994	0	249.9	9.01e-15	477	0.00247278	9.01e-15	29.2987	9	1	1
PF3D7_1326400	A0A5K1K977		tr|A0A5K1K977|A0A5K1K977_PLAF7 Translation initiation factor eIF-2B subunit gamma, putative OS=Plasmodium falciparum (isolate 3D7) OX=36329 GN=PF3D7_1326400 PE=4 SV=1	1	18	473	0	323.31	1.2e-12	769	0.00398652	1.2e-12	28.9044	9	1	1
PF3D7_1355100	Q8IDF0	PF13_0291	tr|Q8IDF0|Q8IDF0_PLAF7 DNA helicase OS=Plasmodium falciparum (isolate 3D7) OX=36329 GN=PF3D7_1355100 PE=3 SV=1	1	27	929	0	47.04	3.03e-17	207	0.0010731	3.03e-17	3.77133	9	1	1
PF3D7_1361000	Q8ID96	PF13_0323	tr|Q8ID96|Q8ID96_PLAF7 Protein arginine N-methyltransferase OS=Plasmodium falciparum (isolate 3D7) OX=36329 GN=PF3D7_1361000 PE=3 SV=1	1	20	724	0	120.09	8.26e-11	998	0.00517367	8.26e-11	28.8333	9	1	1
PF3D7_1027300	Q8IJD0	PF10_0268	tr|Q8IJD0|Q8IJD0_PLAF7 Peroxiredoxin OS=Plasmodium falciparum (isolate 3D7) OX=36329 GN=PF3D7_1027300 PE=4 SV=1	1	12	393	0	163.44	0.000809114	1409	0.0073043	0.000809114	2.12577	9	1	1
PF3D7_1002700	Q8IK09	PF10_0031	tr|Q8IK09|Q8IK09_PLAF7 Uncharacterized protein OS=Plasmodium falciparum (isolate 3D7) OX=36329 GN=PF3D7_1002700 PE=4 SV=1	1	21	944	0	323.31	8.72e-15	472	0.00244686	8.72e-15	28.769	9	1	1
PF3D7_1212700	Q8I5S6	PFL0625c	tr|Q8I5S6|Q8I5S6_PLAF7 Eukaryotic translation initiation factor 3 subunit A OS=Plasmodium falciparum (isolate 3D7) OX=36329 GN=PF3D7_1212700 PE=3 SV=1	1	25	1377	0	158.01	6.12e-10	1105	0.00572836	6.12e-10	3.12857	9	1	1
PF3D7_0629100	C6KTC6	PFF1410c	tr|C6KTC6|C6KTC6_PLAF7 Nicotinate phosphoribosyltransferase, putative OS=Plasmodium falciparum (isolate 3D7) OX=36329 GN=PF3D7_0629100 PE=4 SV=1	1	13	665	0	128.35	1.66e-17	183	0.000948678	1.66e-17	5.11272	9	1	1
PF3D7_1437200	Q8IL94	PF14_0352	tr|Q8IL94|Q8IL94_PLAF7 Ribonucleoside-diphosphate reductase OS=Plasmodium falciparum (isolate 3D7) OX=36329 GN=PF3D7_1437200 PE=3 SV=1	1	17	847	0	251.27	9.86e-17	252	0.00130638	9.86e-17	3.11361	9	1	1
PF3D7_1128000.2	A0A144A0M2;Q8II83	PF11_0291	tr|A0A144A0M2|A0A144A0M2_PLAF7 Uncharacterized protein OS=Plasmodium falciparum (isolate 3D7) OX=36329 GN=PF3D7_1128000.2 PE=4 SV=1;tr|Q8II83|Q8II83_PLAF7 Uncharacterized protein OS=Plasmodium falciparum (isolate 3D7) OX=36329 GN=PF3D7_1128000.1 PE=4 SV=1	2	17	1776	0	22.798	2.49e-14	543	0.00281493	2.49e-14	29.6583	9	1	1
PF3D7_1211400	Q7KQK3	PFL0565w	tr|Q7KQK3|Q7KQK3_PLAF7 Heat shock protein DNAJ homologue Pfj4 OS=Plasmodium falciparum (isolate 3D7) OX=36329 GN=PF3D7_1211400 PE=4 SV=1	1	9	244	0	101.68	6.33e-05	1388	0.00719544	6.33e-05	4.75624	9	1	1
PF3D7_1360800	Q76NL8	flN	tr|Q76NL8|Q76NL8_PLAF7 Falcilysin OS=Plasmodium falciparum (isolate 3D7) OX=36329 GN=PF3D7_1360800 PE=1 SV=1	1	37	1193	0	161.03	6.95e-08	1274	0.00660446	6.95e-08	2.75286	9	1	1
PF3D7_1126900	Q8II94	PF11_0280	tr|Q8II94|Q8II94_PLAF7 Small nuclear ribonucleoprotein F, putative OS=Plasmodium falciparum (isolate 3D7) OX=36329 GN=PF3D7_1126900 PE=3 SV=2	1	3	86	0	10.186	9.24e-12	875	0.00453603	9.24e-12	5.74592	9	1	1
PF3D7_0412200	Q9U0G8	PFD0605c	tr|Q9U0G8|Q9U0G8_PLAF7 Uncharacterized protein OS=Plasmodium falciparum (isolate 3D7) OX=36329 GN=PF3D7_0412200 PE=4 SV=1	1	16	332	0	140.62	8.56e-10	1130	0.00585796	8.56e-10	28.8032	9	1	1
PF3D7_0813900	Q8IAX5	PF08_0076	tr|Q8IAX5|Q8IAX5_PLAF7 40S ribosomal protein S16, putative OS=Plasmodium falciparum (isolate 3D7) OX=36329 GN=PF3D7_0813900 PE=1 SV=1	1	6	144	0	30.739	1.05e-09	1138	0.00589943	1.05e-09	2.90651	9	1	1
PF3D7_1143300	Q8IHT3	PF11_0445	tr|Q8IHT3|Q8IHT3_PLAF7 DNA-directed RNA polymerases I and III subunit RPAC1, putative OS=Plasmodium falciparum (isolate 3D7) OX=36329 GN=PF3D7_1143300 PE=4 SV=1	1	19	333	0	186.16	2.23e-13	674	0.00349404	2.23e-13	28.5301	9	1	1
PF3D7_1453800	A0A144A6N0;Q8IKU0	PF14_0511	tr|A0A144A6N0|A0A144A6N0_PLAF7 Glucose-6-phosphate dehydrogenase-6-phosphogluconolactonase OS=Plasmodium falciparum (isolate 3D7) OX=36329 GN=PF3D7_1453800 PE=3 SV=1;sp|Q8IKU0|GLUPH_PLAF7 Bifunctional glucose-6-phosphate 1-dehydrogenase/6-phosphogluconolac	2	25	910	0	259.55	2.64e-24	2	1.04e-05	2.64e-24	4.19669	9	1	1
PF3D7_1030500	Q8IJA0	PF10_0298	tr|Q8IJA0|Q8IJA0_PLAF7 26S proteasome regulatory subunit RPN9, putative OS=Plasmodium falciparum (isolate 3D7) OX=36329 GN=PF3D7_1030500 PE=4 SV=1	1	13	393	0	109.31	6.68e-11	987	0.00511664	6.68e-11	4.59579	9	1	1
PF3D7_0807800	Q8IAR6	PF08_0109	tr|Q8IAR6|Q8IAR6_PLAF7 26S proteasome regulatory subunit RPN10, putative OS=Plasmodium falciparum (isolate 3D7) OX=36329 GN=PF3D7_0807800 PE=4 SV=1	1	15	481	0	208.56	4.54e-09	1205	0.00624676	4.54e-09	2.29731	9	1	1
PF3D7_0913200	Q8I320	PfEF-1beta	tr|Q8I320|Q8I320_PLAF7 Elongation factor 1-beta OS=Plasmodium falciparum (isolate 3D7) OX=36329 GN=PF3D7_0913200 PE=4 SV=1	1	13	276	0	227.9	4.34e-11	958	0.0049663	4.34e-11	3.39114	9	1	1
PF3D7_1427900	A0A144A431;Q8ILI6	PF14_0257	tr|A0A144A431|A0A144A431_PLAF7 Leucine-rich repeat protein OS=Plasmodium falciparum (isolate 3D7) OX=36329 GN=PF3D7_1427900 PE=4 SV=1;sp|Q8ILI6|AN32_PLAF7 Acidic leucine-rich nuclear phosphoprotein 32-related protein OS=Plasmodium falciparum (isolate 3D7)	2	14	281	0	247.68	8.22e-05	1390	0.00720581	8.22e-05	1.80766	9	1	1
PF3D7_1244100	Q8I4Y9	PFL2120w	tr|Q8I4Y9|Q8I4Y9_PLAF7 N-alpha-acetyltransferase 15, NatA auxiliary subunit, putative OS=Plasmodium falciparum (isolate 3D7) OX=36329 GN=PF3D7_1244100 PE=4 SV=1	1	26	1296	0	226.97	3.31e-14	555	0.00287714	3.31e-14	4.61636	9	1	1
PF3D7_1010600	Q8IJT9	PF10_0103	tr|Q8IJT9|Q8IJT9_PLAF7 Eukaryotic translation initiation factor 2 subunit beta OS=Plasmodium falciparum (isolate 3D7) OX=36329 GN=PF3D7_1010600 PE=4 SV=1	1	13	222	0	106.06	8.89e-14	627	0.00325039	8.89e-14	4.81323	9	1	1
PF3D7_1342000	Q8IDR9	PF13_0228	tr|Q8IDR9|Q8IDR9_PLAF7 40S ribosomal protein S6 OS=Plasmodium falciparum (isolate 3D7) OX=36329 GN=PF3D7_1342000 PE=1 SV=1	1	10	306	0	143.89	6.37e-11	986	0.00511146	6.37e-11	3.65866	9	1	1
PF3D7_1361900	A0A5K1K8U9;P61074	PCNA	tr|A0A5K1K8U9|A0A5K1K8U9_PLAF7 Proliferating cell nuclear antigen OS=Plasmodium falciparum (isolate 3D7) OX=36329 GN=PF3D7_1361900 PE=3 SV=1;sp|P61074|PCNA_PLAF7 Proliferating cell nuclear antigen OS=Plasmodium falciparum (isolate 3D7) OX=36329 GN=PCNA PE=	2	13	274	0	210.77	1.07e-05	1358	0.00703992	1.07e-05	1.84185	9	1	1
PF3D7_0110400	Q8I241	PFA_0505c	tr|Q8I241|Q8I241_PLAF7 DNA-directed RNA polymerase II subunit RPB9, putative OS=Plasmodium falciparum (isolate 3D7) OX=36329 GN=PF3D7_0110400 PE=4 SV=1	1	8	249	0	146.13	3.84e-13	713	0.00369622	3.84e-13	29.8225	9	1	1
PF3D7_1230700	Q8I5B3	PFL1480w	tr|Q8I5B3|Q8I5B3_PLAF7 Protein transport protein SEC13 OS=Plasmodium falciparum (isolate 3D7) OX=36329 GN=PF3D7_1230700 PE=3 SV=1	1	8	822	0	71.226	2.46e-12	808	0.0041887	2.46e-12	6.28966	9	1	1
PF3D7_1305300	C0H5A0	MAL13P1.26	tr|C0H5A0|C0H5A0_PLAF7 Translational activator GCN1, putative OS=Plasmodium falciparum (isolate 3D7) OX=36329 GN=PF3D7_1305300 PE=4 SV=1	1	42	3525	0	152.25	8.79e-22	22	0.000114049	8.79e-22	4.89534	9	1	1
PF3D7_1446200	Q8IL11	LAP	tr|Q8IL11|Q8IL11_PLAF7 M17 leucyl aminopeptidase OS=Plasmodium falciparum (isolate 3D7) OX=36329 GN=PF3D7_1446200 PE=1 SV=1	1	20	605	0	141.37	5.79e-06	1347	0.00698289	5.79e-06	1.85405	9	1	1
PF3D7_0817700	C0H4V4	MAL8P1.73	tr|C0H4V4|C0H4V4_PLAF7 Rhoptry neck protein 5 OS=Plasmodium falciparum (isolate 3D7) OX=36329 GN=PF3D7_0817700 PE=4 SV=1	1	32	1156	0	238.98	1.23e-14	495	0.0025661	1.23e-14	3.4296	9	1	1
PF3D7_1123400	Q8IIC9	PF11_0245	tr|Q8IIC9|Q8IIC9_PLAF7 Translation elongation factor EF-1, subunit alpha, putative OS=Plasmodium falciparum (isolate 3D7) OX=36329 GN=PF3D7_1123400 PE=4 SV=1	1	17	555	0	185.18	1.08e-20	46	0.000238466	1.08e-20	4.38341	9	1	1
PF3D7_1426200	Q8ILK1	PF14_0242	tr|Q8ILK1|Q8ILK1_PLAF7 Protein arginine N-methyltransferase 1 OS=Plasmodium falciparum (isolate 3D7) OX=36329 GN=PF3D7_1426200 PE=3 SV=1	1	9	401	0	41.401	1.83e-09	1162	0.00602385	1.83e-09	4.09595	9	1	1
PF3D7_1329300	Q8IE52	PF13_0149	tr|Q8IE52|Q8IE52_PLAF7 Chromatin assembly factor 1 subunit B, putative OS=Plasmodium falciparum (isolate 3D7) OX=36329 GN=PF3D7_1329300 PE=4 SV=1	1	17	582	0	265.01	9.95e-13	758	0.0039295	9.95e-13	4.00062	9	1	1
PF3D7_0517700	Q8I3T1	PFE0885w	tr|Q8I3T1|Q8I3T1_PLAF7 Eukaryotic translation initiation factor 3 subunit B OS=Plasmodium falciparum (isolate 3D7) OX=36329 GN=PF3D7_0517700 PE=3 SV=1	1	22	716	0	205.17	1.15e-11	886	0.00459305	1.15e-11	3.30767	9	1	1
PF3D7_1015600	Q8IJN9	PF10_0153	tr|Q8IJN9|Q8IJN9_PLAF7 Heat shock protein 60 OS=Plasmodium falciparum (isolate 3D7) OX=36329 GN=PF3D7_1015600 PE=3 SV=1	1	26	580	0	130.44	3.58e-07	1304	0.00675998	3.58e-07	2.12286	9	1	1
PF3D7_1104000	Q8IIW2	PF11_0051	tr|Q8IIW2|Q8IIW2_PLAF7 Phenylalanine--tRNA ligase beta subunit OS=Plasmodium falciparum (isolate 3D7) OX=36329 GN=PF3D7_1104000 PE=4 SV=1	1	29	623	0	271.97	7.88e-16	344	0.00178331	7.88e-16	3.70789	9	1	1
PF3D7_1217900	Q8I5M9	PFL0865w	tr|Q8I5M9|Q8I5M9_PLAF7 PPPDE peptidase domain-containing protein, putative OS=Plasmodium falciparum (isolate 3D7) OX=36329 GN=PF3D7_1217900 PE=4 SV=1	1	11	483	0	296.37	3.54e-14	559	0.00289787	3.54e-14	6.46987	9	1	1
PF3D7_0317300	O77384	PFC0760c	sp|O77384|LRR4_PLAF7 Protein PFC0760c OS=Plasmodium falciparum (isolate 3D7) OX=36329 GN=PFC0760c PE=1 SV=1	1	42	3394	0	179.04	2.03e-13	669	0.00346812	2.03e-13	28.2964	9	1	1
PF3D7_1424400	Q8ILL2	PF14_0231	tr|Q8ILL2|Q8ILL2_PLAF7 60S ribosomal protein L7-3, putative OS=Plasmodium falciparum (isolate 3D7) OX=36329 GN=PF3D7_1424400 PE=1 SV=2	1	11	283	0	46.36	3.28e-05	1377	0.00713841	3.28e-05	2.4259	9	1	1
PF3D7_0934100	Q8I2H7	PFI1650w	tr|Q8I2H7|Q8I2H7_PLAF7 TFIIH basal transcription factor complex helicase XPD subunit OS=Plasmodium falciparum (isolate 3D7) OX=36329 GN=PF3D7_0934100 PE=4 SV=1	1	23	1056	0	138.44	7.66e-13	751	0.00389321	7.66e-13	28.6869	9	1	1
PF3D7_0316300.2	C0H477;O77392	PFC0710w.1	tr|C0H477|C0H477_PLAF7 Inorganic pyrophosphatase, putative OS=Plasmodium falciparum (isolate 3D7) OX=36329 GN=PF3D7_0316300.2 PE=4 SV=1;sp|O77392|IPYR_PLAF7 Probable inorganic pyrophosphatase OS=Plasmodium falciparum (isolate 3D7) OX=36329 GN=MAL3P6.3 PE=1	2	14	431	0	228.5	1.78e-12	790	0.00409539	1.78e-12	4.1751	9	1	1
PF3D7_0304200	Q9NLB8	PfPast-1	tr|Q9NLB8|Q9NLB8_PLAF7 EH domain-containing protein OS=Plasmodium falciparum (isolate 3D7) OX=36329 GN=PF3D7_0304200 PE=3 SV=1	1	7	533	0	11.372	1.14e-16	257	0.0013323	1.14e-16	30.8348	9	1	1
PF3D7_0309300	O77329	PFC0390w	tr|O77329|O77329_PLAF7 N2227-like protein, putative OS=Plasmodium falciparum (isolate 3D7) OX=36329 GN=PF3D7_0309300 PE=4 SV=1	1	15	955	0	110.9	1.72e-12	788	0.00408502	1.72e-12	28.5979	9	1	1
PF3D7_0513200	Q8I3X5	PFE0655w	tr|Q8I3X5|Q8I3X5_PLAF7 CPSF_A domain-containing protein OS=Plasmodium falciparum (isolate 3D7) OX=36329 GN=PF3D7_0513200 PE=4 SV=1	1	34	2763	0	196.62	3.87e-15	425	0.00220321	3.87e-15	28.4276	9	1	1
PF3D7_1420600	Q8ILP4	PF14_0200	tr|Q8ILP4|Q8ILP4_PLAF7 Pantothenate kinase 1, putative OS=Plasmodium falciparum (isolate 3D7) OX=36329 GN=PF3D7_1420600 PE=4 SV=2	1	15	519	0	36.617	1.24e-12	773	0.00400726	1.24e-12	2.79017	9	1	1
PF3D7_1247400	Q8I4V8	FKBP35	tr|Q8I4V8|Q8I4V8_PLAF7 Peptidylprolyl isomerase OS=Plasmodium falciparum (isolate 3D7) OX=36329 GN=PF3D7_1247400 PE=1 SV=1	1	14	304	0	90.852	5.39e-12	844	0.00437532	5.39e-12	3.90002	9	1	1
PF3D7_1316600	Q8IEE9	ctP	tr|Q8IEE9|Q8IEE9_PLAF7 Choline-phosphate cytidylyltransferase OS=Plasmodium falciparum (isolate 3D7) OX=36329 GN=PF3D7_1316600 PE=1 SV=1	1	18	896	0	125.38	4.7e-21	41	0.000212545	4.7e-21	5.5632	9	1	1
PF3D7_0216400	O96243	PFB0750w	tr|O96243|O96243_PLAF7 Vacuolar protein sorting-associated protein 45 OS=Plasmodium falciparum (isolate 3D7) OX=36329 GN=PF3D7_0216400 PE=3 SV=1	1	11	722	0	22.415	1.28e-11	893	0.00462934	1.28e-11	29.5291	9	1	1
PF3D7_1019400	Q8IJK8	PF10_0187	tr|Q8IJK8|Q8IJK8_PLAF7 60S ribosomal protein L30e, putative OS=Plasmodium falciparum (isolate 3D7) OX=36329 GN=PF3D7_1019400 PE=1 SV=1	1	4	108	0	126.02	9.44e-07	1322	0.00685329	9.44e-07	3.12474	9	1	1
PF3D7_1368100	Q8ID28	MAL13P1.343	tr|Q8ID28|Q8ID28_PLAF7 26S proteasome regulatory subunit RPN11, putative OS=Plasmodium falciparum (isolate 3D7) OX=36329 GN=PF3D7_1368100 PE=4 SV=1	1	10	311	0	58.021	1.3e-08	1234	0.0063971	1.3e-08	4.4773	9	1	1
PF3D7_1416900	Q8ILS7	PF14_0167	tr|Q8ILS7|Q8ILS7_PLAF7 Prefoldin subunit 2, putative OS=Plasmodium falciparum (isolate 3D7) OX=36329 GN=PF3D7_1416900 PE=4 SV=1	1	9	147	0	52.371	8.79e-08	1276	0.00661483	8.79e-08	5.26957	9	1	1
PF3D7_1368200	Q8I6Z4	MAL13P1.344	tr|Q8I6Z4|Q8I6Z4_PLAF7 ABC transporter E family member 1, putative OS=Plasmodium falciparum (isolate 3D7) OX=36329 GN=PF3D7_1368200 PE=4 SV=1	1	15	619	0	177.82	3.19e-10	1068	0.00553655	3.19e-10	1.68627	9	1	1
PF3D7_1234800	Q8I574	PFL1680w	tr|Q8I574|Q8I574_PLAF7 Splicing factor 3B subunit 3, putative OS=Plasmodium falciparum (isolate 3D7) OX=36329 GN=PF3D7_1234800 PE=4 SV=1	1	30	1329	0	101.91	1.74e-19	74	0.000383618	1.74e-19	4.51508	9	1	1
PF3D7_0811400	C0H4U0	MAL8P1.103	tr|C0H4U0|C0H4U0_PLAF7 Uncharacterized protein OS=Plasmodium falciparum (isolate 3D7) OX=36329 GN=PF3D7_0811400 PE=4 SV=1	1	23	608	0	183.33	3.82e-11	953	0.00494038	3.82e-11	4.2926	9	1	1
PF3D7_0802200	Q8IAM2	1-cyspxn	tr|Q8IAM2|Q8IAM2_PLAF7 1-cys peroxiredoxin OS=Plasmodium falciparum (isolate 3D7) OX=36329 GN=PF3D7_0802200 PE=4 SV=1	1	11	220	0	240.17	3.58e-05	1378	0.0071436	3.58e-05	1.72657	9	1	1
PF3D7_0405700	Q8I1X1	PFD0285c	tr|Q8I1X1|Q8I1X1_PLAF7 Lysine decarboxylase, putative OS=Plasmodium falciparum (isolate 3D7) OX=36329 GN=PF3D7_0405700 PE=4 SV=1	1	23	2415	0	59.562	8.21e-17	247	0.00128046	8.21e-17	27.6524	9	1	1
PF3D7_0322000	Q76NN7	PfCyP19	tr|Q76NN7|Q76NN7_PLAF7 Peptidyl-prolyl cis-trans isomerase OS=Plasmodium falciparum (isolate 3D7) OX=36329 GN=PF3D7_0322000 PE=3 SV=1	1	6	171	0	92.234	0.000768513	1407	0.00729393	0.000768513	1.49885	9	1	1
PF3D7_1465300	Q8IKI5	PF14_0620	tr|Q8IKI5|Q8IKI5_PLAF7 Ribonuclease Z, putative OS=Plasmodium falciparum (isolate 3D7) OX=36329 GN=PF3D7_1465300 PE=4 SV=1	1	17	858	0	66.956	2.18e-12	804	0.00416796	2.18e-12	27.5074	9	1	1
PF3D7_0910100	C0H530	PFI0490c	tr|C0H530|C0H530_PLAF7 Exportin-7, putative OS=Plasmodium falciparum (isolate 3D7) OX=36329 GN=PF3D7_0910100 PE=4 SV=1	1	21	1198	0	144.65	6.25e-21	43	0.000222913	6.25e-21	5.03631	9	1	1
PF3D7_1438700	A0A144A659;Q7KQM1	PF14_0366	tr|A0A144A659|A0A144A659_PLAF7 DNA primase OS=Plasmodium falciparum (isolate 3D7) OX=36329 GN=PF3D7_1438700 PE=3 SV=1;sp|Q7KQM1|PRI1_PLAF7 DNA primase small subunit OS=Plasmodium falciparum (isolate 3D7) OX=36329 GN=PF14_0366 PE=3 SV=1	2	18	452	0	142.19	1.47e-15	374	0.00193883	1.47e-15	4.94791	9	1	1
PF3D7_1329100	Q8IE50	MAL13P1.148	tr|Q8IE50|Q8IE50_PLAF7 Myosin F, putative OS=Plasmodium falciparum (isolate 3D7) OX=36329 GN=PF3D7_1329100 PE=3 SV=1	1	32	2160	0	266.4	2.38e-14	540	0.00279938	2.38e-14	4.0307	9	1	1
PF3D7_1457200	A0A144A4E0;Q7KQL8	PF14_0545	tr|A0A144A4E0|A0A144A4E0_PLAF7 Thioredoxin OS=Plasmodium falciparum (isolate 3D7) OX=36329 GN=PF3D7_1457200 PE=3 SV=1;sp|Q7KQL8|THIO_PLAF7 Thioredoxin OS=Plasmodium falciparum (isolate 3D7) OX=36329 GN=PF14_0545 PE=1 SV=1	2	6	104	0	100.06	0.000865985	1411	0.00731467	0.000865985	1.56763	9	1	1
PF3D7_0308600	O77325	PFC0365w	tr|O77325|O77325_PLAF7 Pre-mRNA-processing factor 19, putative OS=Plasmodium falciparum (isolate 3D7) OX=36329 GN=PF3D7_0308600 PE=4 SV=1	1	14	532	0	323.31	2.4e-14	541	0.00280456	2.4e-14	5.64332	9	1	1
PF3D7_1331700	Q8IE10	PF13_0170	tr|Q8IE10|Q8IE10_PLAF7 Glutamine--tRNA ligase, putative OS=Plasmodium falciparum (isolate 3D7) OX=36329 GN=PF3D7_1331700 PE=3 SV=1	1	25	918	0	213.11	1.96e-17	191	0.00099015	1.96e-17	3.46737	9	1	1
PF3D7_1004000	Q8IJZ7	PF10_0043	tr|Q8IJZ7|Q8IJZ7_PLAF7 60S ribosomal protein L13, putative OS=Plasmodium falciparum (isolate 3D7) OX=36329 GN=PF3D7_1004000 PE=1 SV=1	1	9	202	0	83.394	8.69e-09	1224	0.00634526	8.69e-09	2.17946	9	1	1
PF3D7_0822600	Q8IB60	Pfsec23	tr|Q8IB60|Q8IB60_PLAF7 Protein transport protein SEC23 OS=Plasmodium falciparum (isolate 3D7) OX=36329 GN=pfsec23 PE=2 SV=1	1	17	759	0	273.68	3.68e-13	708	0.0036703	3.68e-13	3.8872	9	1	1
PF3D7_0526200.2	A0A143ZVA6;C0H4G3	PFE1305c	tr|A0A143ZVA6|A0A143ZVA6_PLAF7 ADP-ribosylation factor GTPase-activating protein, putative OS=Plasmodium falciparum (isolate 3D7) OX=36329 GN=PF3D7_0526200.2 PE=4 SV=1;tr|C0H4G3|C0H4G3_PLAF7 ADP-ribosylation factor GTPase-activating protein, putative OS=Pl	2	12	505	0	201.28	3.29e-14	554	0.00287195	3.29e-14	29.2152	9	1	1
PF3D7_1466900	Q8IKG8	PF14_0637	tr|Q8IKG8|Q8IKG8_PLAF7 Uncharacterized protein OS=Plasmodium falciparum (isolate 3D7) OX=36329 GN=PF3D7_1466900 PE=4 SV=2	1	25	1416	0	323.31	2.79e-15	408	0.00211509	2.79e-15	28.1049	9	1	1
PF3D7_1104200	Q8IIW0	PF11_0053	tr|Q8IIW0|Q8IIW0_PLAF7 Chromatin remodeling protein OS=Plasmodium falciparum (isolate 3D7) OX=36329 GN=PF3D7_1104200 PE=4 SV=1	1	30	1426	0	148.49	1.93e-19	75	0.000388802	1.93e-19	4.61569	9	1	1
PF3D7_1363100	A0A5K1K9B5		tr|A0A5K1K9B5|A0A5K1K9B5_PLAF7 Uncharacterized protein OS=Plasmodium falciparum (isolate 3D7) OX=36329 GN=PF3D7_1363100 PE=4 SV=1	1	29	1024	0	185.88	2.5e-13	681	0.00353033	2.5e-13	28.0424	9	1	1
PF3D7_0705700	C0H4K8	MAL7P1.300	tr|C0H4K8|C0H4K8_PLAF7 40S ribosomal protein S29, putative OS=Plasmodium falciparum (isolate 3D7) OX=36329 GN=PF3D7_0705700 PE=1 SV=1	1	3	54	0.00054142	0.33583	5.19e-11	972	0.00503888	5.19e-11	2.97244	9	1	1
PF3D7_1336800	Q8IDW4	PF13_0204	tr|Q8IDW4|Q8IDW4_PLAF7 Nuclear movement protein, putative OS=Plasmodium falciparum (isolate 3D7) OX=36329 GN=PF3D7_1336800 PE=4 SV=1	1	8	386	0	219.48	1.17e-14	490	0.00254018	1.17e-14	29.9268	9	1	1
PF3D7_1317100	Q8IEE5	PF13_0095	tr|Q8IEE5|Q8IEE5_PLAF7 DNA replication licensing factor MCM4 OS=Plasmodium falciparum (isolate 3D7) OX=36329 GN=PF3D7_1317100 PE=3 SV=1	1	31	1005	0	194.57	7.52e-23	10	5.18e-05	7.52e-23	3.45977	9	1	1
PF3D7_0211800	O96198	PFB0525w	tr|O96198|O96198_PLAF7 Asparagine--tRNA ligase OS=Plasmodium falciparum (isolate 3D7) OX=36329 GN=PF3D7_0211800 PE=3 SV=1	1	19	610	0	169.33	2.32e-11	924	0.00479005	2.32e-11	2.30016	9	1	1
PF3D7_1144900	Q8IHR8	Rab6	tr|Q8IHR8|Q8IHR8_PLAF7 Ras-related protein Rab-6 OS=Plasmodium falciparum (isolate 3D7) OX=36329 GN=PF3D7_1144900 PE=4 SV=2	1	10	207	0	110.58	6.55e-10	1111	0.00575946	6.55e-10	3.84411	9	1	1
PF3D7_0207700	O96164;O96167	SERA-4	tr|O96164|O96164_PLAF7 Serine repeat antigen 4 OS=Plasmodium falciparum (isolate 3D7) OX=36329 GN=PF3D7_0207700 PE=1 SV=1	2	30	962	0	258.25	1.92e-05	1369	0.00709694	1.92e-05	1.74181	9	1	1
PF3D7_0907700	Q8I374	PFI0370c	tr|Q8I374|Q8I374_PLAF7 Proteasome activator 28 subunit beta, putative OS=Plasmodium falciparum (isolate 3D7) OX=36329 GN=PF3D7_0907700 PE=1 SV=1	1	11	279	0	234.5	2.94e-09	1182	0.00612753	2.94e-09	4.3987	9	1	1
PF3D7_0705400	Q8IC16	PF07_0023	tr|Q8IC16|Q8IC16_PLAF7 DNA replication licensing factor MCM7 OS=Plasmodium falciparum (isolate 3D7) OX=36329 GN=MCM7 PE=3 SV=1	1	25	821	0	245.24	1.5e-20	49	0.000254018	1.5e-20	3.6819	9	1	1
PF3D7_0704200	Q8IC28	PF07_0015	tr|Q8IC28|Q8IC28_PLAF7 tRNA m5C-methyltransferase, putative OS=Plasmodium falciparum (isolate 3D7) OX=36329 GN=PF3D7_0704200 PE=3 SV=1	1	24	1193	0	202.16	6.48e-15	450	0.00233281	6.48e-15	27.8855	9	1	1
PF3D7_0309500	O77330	PFC0395w	tr|O77330|O77330_PLAF7 Asparagine synthetase [glutamine-hydrolyzing], putative OS=Plasmodium falciparum (isolate 3D7) OX=36329 GN=PF3D7_0309500 PE=4 SV=1	1	16	610	0	77.299	5.69e-16	330	0.00171073	5.69e-16	3.17348	9	1	1
PF3D7_0306900	O97248	PFC0290w	tr|O97248|O97248_PLAF7 40S ribosomal protein S23, putative OS=Plasmodium falciparum (isolate 3D7) OX=36329 GN=PF3D7_0306900 PE=1 SV=1	1	4	145	0	108.82	1.32e-14	499	0.00258683	1.32e-14	4.43166	9	1	1
PF3D7_1414800	Q8ILU8	PF14_0146	tr|Q8ILU8|Q8ILU8_PLAF7 Small nuclear ribonucleoprotein-associated protein B, putative OS=Plasmodium falciparum (isolate 3D7) OX=36329 GN=PF3D7_1414800 PE=4 SV=1	1	8	201	0	145.37	9.78e-11	1008	0.00522551	9.78e-11	5.30699	9	1	1
PF3D7_0501800	Q8I482	PFE0090w	tr|Q8I482|Q8I482_PLAF7 Protein HIRA OS=Plasmodium falciparum (isolate 3D7) OX=36329 GN=PF3D7_0501800 PE=3 SV=1	1	21	1076	0	193.51	7.23e-11	990	0.00513219	7.23e-11	28.0852	9	1	1
PF3D7_1213200	Q8I5S3	PFL0640w	tr|Q8I5S3|Q8I5S3_PLAF7 Mediator of RNA polymerase II transcription subunit 18, putative OS=Plasmodium falciparum (isolate 3D7) OX=36329 GN=PF3D7_1213200 PE=4 SV=1	1	12	278	0	149.98	4.09e-09	1199	0.00621566	4.09e-09	28.5125	9	1	1
PF3D7_1433500	Q8ILC8	PF14_0316	tr|Q8ILC8|Q8ILC8_PLAF7 DNA topoisomerase 2 OS=Plasmodium falciparum (isolate 3D7) OX=36329 GN=PF3D7_1433500 PE=3 SV=1	1	27	1472	0	52.982	1.16e-16	258	0.00133748	1.16e-16	3.75908	9	1	1
PF3D7_1341200	Q8IDS6	PF13_0224	tr|Q8IDS6|Q8IDS6_PLAF7 60S ribosomal protein L18a OS=Plasmodium falciparum (isolate 3D7) OX=36329 GN=PF3D7_1341200 PE=1 SV=1	1	8	184	0	100.7	9.72e-08	1279	0.00663038	9.72e-08	2.20069	9	1	1
PF3D7_0923000	Q8I2S6	PFI1130c	tr|Q8I2S6|Q8I2S6_PLAF7 DNA-directed RNA polymerase II subunit RPB3, putative OS=Plasmodium falciparum (isolate 3D7) OX=36329 GN=PF3D7_0923000 PE=4 SV=1	1	10	335	0	146.26	1.43e-10	1027	0.005324	1.43e-10	5.57362	9	1	1
PF3D7_1235600	Q8I566	PFL1720w	tr|Q8I566|Q8I566_PLAF7 Serine hydroxymethyltransferase OS=Plasmodium falciparum (isolate 3D7) OX=36329 GN=PF3D7_1235600 PE=1 SV=1	1	20	442	0	84.085	0.00526155	1425	0.00738725	0.00526155	1.44008	9	1	1
PF3D7_1423700	Q8ILL5	PF14_0228	tr|Q8ILL5|Q8ILL5_PLAF7 NTF2 domain-containing protein OS=Plasmodium falciparum (isolate 3D7) OX=36329 GN=PF3D7_1423700 PE=4 SV=1	1	12	1558	0	132.66	4.86e-20	59	0.000305858	4.86e-20	3.88686	9	1	1
PF3D7_1130500	Q8II59	PF11_0315	tr|Q8II59|Q8II59_PLAF7 Conserved oligomeric Golgi complex subunit 2, putative OS=Plasmodium falciparum (isolate 3D7) OX=36329 GN=PF3D7_1130500 PE=4 SV=1	1	21	985	0	155.1	1.26e-15	367	0.00190254	1.26e-15	28.2074	9	1	1
PF3D7_1342400	Q8IDR5	PfCK2beta2	tr|Q8IDR5|Q8IDR5_PLAF7 Casein kinase II subunit beta OS=Plasmodium falciparum (isolate 3D7) OX=36329 GN=PF3D7_1342400 PE=3 SV=1	1	8	385	0	73.146	2.31e-09	1171	0.0060705	2.31e-09	5.14381	9	1	1
PF3D7_0516900	Q8I3T9	PFE0845c	tr|Q8I3T9|Q8I3T9_PLAF7 60S ribosomal protein L2 OS=Plasmodium falciparum (isolate 3D7) OX=36329 GN=PF3D7_0516900 PE=1 SV=1	1	7	260	0	58.918	6.53e-09	1215	0.0062986	6.53e-09	2.97796	9	1	1
PF3D7_1224000	Q8I5H7	PFL1155w	tr|Q8I5H7|Q8I5H7_PLAF7 GTP cyclohydrolase 1 OS=Plasmodium falciparum (isolate 3D7) OX=36329 GN=PF3D7_1224000 PE=4 SV=1	1	10	389	0	239.33	6.59e-10	1112	0.00576464	6.59e-10	4.3543	9	1	1
PF3D7_1302800	Q8IET7	PF13_0014	tr|Q8IET7|Q8IET7_PLAF7 40S ribosomal protein S7 OS=Plasmodium falciparum (isolate 3D7) OX=36329 GN=PF3D7_1302800 PE=1 SV=1	1	13	194	0	131.78	1.57e-12	783	0.0040591	1.57e-12	3.25763	9	1	1
PF3D7_0627700	C6KTB3	PFF1345w	tr|C6KTB3|C6KTB3_PLAF7 Transportin OS=Plasmodium falciparum (isolate 3D7) OX=36329 GN=PF3D7_0627700 PE=4 SV=1	1	24	1147	0	86.998	9.03e-18	165	0.000855365	9.03e-18	2.65746	9	1	1
PF3D7_1434300	A0A144A2J9;Q8ILC1	PF14_0324	tr|A0A144A2J9|A0A144A2J9_PLAF7 Hsp70/Hsp90 organizing protein OS=Plasmodium falciparum (isolate 3D7) OX=36329 GN=PF3D7_1434300 PE=4 SV=1;sp|Q8ILC1|STI1L_PLAF7 STI1-like protein OS=Plasmodium falciparum (isolate 3D7) OX=36329 GN=PF14_0324 PE=4 SV=1	2	21	564	0	89.592	8.08e-06	1354	0.00701918	8.08e-06	2.04832	9	1	1
PF3D7_0613900	C6KSY1	MyoE	tr|C6KSY1|C6KSY1_PLAF7 Myosin E, putative OS=Plasmodium falciparum (isolate 3D7) OX=36329 GN=PF3D7_0613900 PE=3 SV=1	1	33	2153	0	217.74	1.51e-20	50	0.000259202	1.51e-20	28.1724	9	1	1
PF3D7_1139800	Q8IHW8	PF11_0408	tr|Q8IHW8|Q8IHW8_PLAF7 Uncharacterized protein OS=Plasmodium falciparum (isolate 3D7) OX=36329 GN=PF3D7_1139800 PE=4 SV=1	1	23	2213	0	157.76	1.31e-15	370	0.00191809	1.31e-15	28.3571	9	1	1
PF3D7_1352400	A0A5K1K907		tr|A0A5K1K907|A0A5K1K907_PLAF7 Uncharacterized protein OS=Plasmodium falciparum (isolate 3D7) OX=36329 GN=PF3D7_1352400 PE=4 SV=1	1	29	1594	0	243.65	1.99e-13	667	0.00345775	1.99e-13	27.2282	9	1	1
PF3D7_0613500	C6KSX7	PFF0655c	tr|C6KSX7|C6KSX7_PLAF7 AP-3 complex subunit beta, putative OS=Plasmodium falciparum (isolate 3D7) OX=36329 GN=PF3D7_0613500 PE=4 SV=1	1	18	1363	0	89.721	3.26e-14	553	0.00286677	3.26e-14	28.4728	9	1	1
PF3D7_1412100	Q8ILX3	PF14_0120	tr|Q8ILX3|Q8ILX3_PLAF7 Mini-chromosome maintenance complex-binding protein, putative OS=Plasmodium falciparum (isolate 3D7) OX=36329 GN=PF3D7_1412100 PE=4 SV=1	1	19	956	0	129.79	6.29e-15	447	0.00231726	6.29e-15	5.06437	9	1	1
PF3D7_0529400.2	A0A143ZVA4;A0A143ZXE1		tr|A0A143ZVA4|A0A143ZVA4_PLAF7 Uncharacterized protein OS=Plasmodium falciparum (isolate 3D7) OX=36329 GN=PF3D7_0529400.2 PE=4 SV=1;tr|A0A143ZXE1|A0A143ZXE1_PLAF7 Uncharacterized protein OS=Plasmodium falciparum (isolate 3D7) OX=36329 GN=PF3D7_0529400.1 PE	2	14	1502	0	270	9.36e-20	68	0.000352514	9.36e-20	28.5388	9	1	1
PF3D7_1127100	Q8II92	PF11_0282	tr|Q8II92|Q8II92_PLAF7 Deoxyuridine 5-triphosphate nucleotidohydrolase OS=Plasmodium falciparum (isolate 3D7) OX=36329 GN=PF3D7_1127100 PE=1 SV=1	1	7	173	0	185.95	3.69e-12	827	0.00428719	3.69e-12	3.9926	9	1	1
PF3D7_1358800	Q8IDB0	PF13_0316	tr|Q8IDB0|Q8IDB0_PLAF7 40S ribosomal protein S15 OS=Plasmodium falciparum (isolate 3D7) OX=36329 GN=PF3D7_1358800 PE=1 SV=1	1	8	151	0	28.946	1.78e-05	1366	0.00708139	1.78e-05	2.33587	9	1	1
PF3D7_0709300	Q8IBZ6	PF07_0037	tr|Q8IBZ6|Q8IBZ6_PLAF7 Mediator of RNA polymerase II transcription subunit 14 OS=Plasmodium falciparum (isolate 3D7) OX=36329 GN=PF3D7_0709300 PE=3 SV=1	1	35	2729	0	113.2	1.48e-11	901	0.00467081	1.48e-11	27.7206	9	1	1
PF3D7_0527000	Q8I3J5	PFE1345c	tr|Q8I3J5|Q8I3J5_PLAF7 DNA replication licensing factor MCM3, putative OS=Plasmodium falciparum (isolate 3D7) OX=36329 GN=PF3D7_0527000 PE=3 SV=1	1	28	962	0	139.66	2e-17	193	0.00100052	2e-17	3.4661	9	1	1
PF3D7_1315900	A0A5K1K8Q1		tr|A0A5K1K8Q1|A0A5K1K8Q1_PLAF7 Exportin-T OS=Plasmodium falciparum (isolate 3D7) OX=36329 GN=PF3D7_1315900 PE=3 SV=1	1	18	1232	0	143.81	9.94e-23	12	6.22e-05	9.94e-23	4.32865	9	1	1
PF3D7_0214100	O96221	Sec31p	tr|O96221|O96221_PLAF7 Protein transport protein SEC31 OS=Plasmodium falciparum (isolate 3D7) OX=36329 GN=PF3D7_0214100 PE=4 SV=3	1	20	1471	0	137.48	2.45e-11	932	0.00483152	2.45e-11	3.46606	9	1	1
PF3D7_1208900	Q8I5V9	PFL0445w	tr|Q8I5V9|Q8I5V9_PLAF7 Protein phosphatase PPM11, putative OS=Plasmodium falciparum (isolate 3D7) OX=36329 GN=PF3D7_1208900 PE=4 SV=1	1	15	1442	0	213.53	3.33e-18	134	0.00069466	3.33e-18	5.66349	9	1	1
PF3D7_0605800	C6KSQ6	PFF0285c	sp|C6KSQ6|RAD50_PLAF7 Probable DNA repair protein RAD50 OS=Plasmodium falciparum (isolate 3D7) OX=36329 GN=PFF0285c PE=1 SV=1	1	32	2236	0	65.208	2.24e-10	1050	0.00544324	2.24e-10	28.5563	9	1	1
PF3D7_0707200	C0H4L9	MAL7P1.207	tr|C0H4L9|C0H4L9_PLAF7 Uncharacterized protein OS=Plasmodium falciparum (isolate 3D7) OX=36329 GN=PF3D7_0707200 PE=4 SV=1	1	25	2129	0	77.538	6.99e-20	64	0.000331778	6.99e-20	28.1631	9	1	1
PF3D7_1412500	A0A144A3N9;Q8ILW9	PF14_0124	tr|A0A144A3N9|A0A144A3N9_PLAF7 Actin II OS=Plasmodium falciparum (isolate 3D7) OX=36329 GN=PF3D7_1412500 PE=3 SV=1;sp|Q8ILW9|ACT2_PLAF7 Actin-2 OS=Plasmodium falciparum (isolate 3D7) OX=36329 GN=PF14_0124 PE=3 SV=1	2	12	376	0	234.38	3.87e-12	830	0.00430275	3.87e-12	2.19826	9	1	1
PF3D7_0934800	Q7K6A0	PfPKAc	tr|Q7K6A0|Q7K6A0_PLAF7 cAMP-dependent protein kinase catalytic subunit OS=Plasmodium falciparum (isolate 3D7) OX=36329 GN=PF3D7_0934800 PE=3 SV=1	1	11	342	0	10.819	6.36e-10	1107	0.00573873	6.36e-10	4.18645	9	1	1
PF3D7_1006800	Q8IJX3	PF10_0068	tr|Q8IJX3|Q8IJX3_PLAF7 Single-strand telomeric DNA-binding protein GBP2, putative OS=Plasmodium falciparum (isolate 3D7) OX=36329 GN=PF3D7_1006800 PE=4 SV=1	1	8	246	0	163.7	1.74e-07	1289	0.00668222	1.74e-07	2.00048	9	1	1
PF3D7_0207500	Q9TY96	SERA-6	tr|Q9TY96|Q9TY96_PLAF7 Serine repeat antigen 6 OS=Plasmodium falciparum (isolate 3D7) OX=36329 GN=PF3D7_0207500 PE=1 SV=3	1	26	1031	0	194.55	5.41e-06	1346	0.00697771	5.41e-06	2.26515	9	1	1
PF3D7_1019000	Q8IJL2	PF10_0183	tr|Q8IJL2|Q8IJL2_PLAF7 Eukaryotic translation initiation factor subunit eIF2A, putative OS=Plasmodium falciparum (isolate 3D7) OX=36329 GN=PF3D7_1019000 PE=4 SV=1	1	24	2405	0	298.05	1.46e-16	269	0.00139451	1.46e-16	27.9313	9	1	1
PF3D7_0613700	C6KSX9	PFF0665c	tr|C6KSX9|C6KSX9_PLAF7 Syntaxin-binding protein, putative OS=Plasmodium falciparum (isolate 3D7) OX=36329 GN=PF3D7_0613700 PE=3 SV=1	1	15	703	0	279.34	2.09e-10	1047	0.00542768	2.09e-10	28.4409	9	1	1
PF3D7_1366300	A0A5K1K933		tr|A0A5K1K933|A0A5K1K933_PLAF7 Uncharacterized protein OS=Plasmodium falciparum (isolate 3D7) OX=36329 GN=PF3D7_1366300 PE=4 SV=1	1	12	4136	0	44.255	5.68e-14	594	0.00307932	5.68e-14	29.5238	9	1	1
PF3D7_0507700	Q8I426	PFE0380c	tr|Q8I426|Q8I426_PLAF7 Nuclear protein localization protein 4, putative OS=Plasmodium falciparum (isolate 3D7) OX=36329 GN=PF3D7_0507700 PE=4 SV=1	1	15	531	0	66.962	1.97e-19	76	0.000393987	1.97e-19	4.19783	9	1	1
PF3D7_1355500	Q8IDE7	PfPP5	tr|Q8IDE7|Q8IDE7_PLAF7 Serine/threonine protein phosphatase 5 OS=Plasmodium falciparum (isolate 3D7) OX=36329 GN=PF3D7_1355500 PE=4 SV=1	1	20	658	0	36.33	2.38e-19	79	0.000409539	2.38e-19	4.54635	9	1	1
PF3D7_1110500	Q8IIQ6	PF11_0112	tr|Q8IIQ6|Q8IIQ6_PLAF7 Vacuolar protein sorting-associated protein 35 OS=Plasmodium falciparum (isolate 3D7) OX=36329 GN=PF3D7_1110500 PE=3 SV=1	1	19	1050	0	72.541	7.76e-13	752	0.00389839	7.76e-13	28.2477	9	1	1
PF3D7_0305200	O97237	PFC0235w	sp|O97237|YGCC1_PLAF7 GRIP and coiled-coil domain-containing protein PFC0235w OS=Plasmodium falciparum (isolate 3D7) OX=36329 GN=PFC0235w PE=1 SV=2	1	15	1139	0	71.602	8.4e-10	1128	0.00584759	8.4e-10	29.3548	9	1	1
PF3D7_0919800	Q8I2V5	PFI0970c	tr|Q8I2V5|Q8I2V5_PLAF7 TLD domain-containing protein OS=Plasmodium falciparum (isolate 3D7) OX=36329 GN=PF3D7_0919800 PE=4 SV=1	1	14	1078	0	101.44	1.01e-14	479	0.00248315	1.01e-14	29.36	9	1	1
PF3D7_0517400	Q8I3T4	PFE0870w	tr|Q8I3T4|Q8I3T4_PLAF7 FACT complex subunit SPT16, putative OS=Plasmodium falciparum (isolate 3D7) OX=36329 GN=PF3D7_0517400 PE=4 SV=1	1	20	1141	0	100.28	9e-14	630	0.00326594	9e-14	2.19124	9	1	1
PF3D7_0303100	O77314	PFC0145c	tr|O77314|O77314_PLAF7 CLP1 P-loop domain-containing protein, putative OS=Plasmodium falciparum (isolate 3D7) OX=36329 GN=PF3D7_0303100 PE=4 SV=1	1	30	1441	0	77.568	1.08e-14	485	0.00251426	1.08e-14	27.7727	9	1	1
PF3D7_1451900	Q8IKV7	PF14_0494	tr|Q8IKV7|Q8IKV7_PLAF7 Ribosome biogenesis protein TSR1, putative OS=Plasmodium falciparum (isolate 3D7) OX=36329 GN=PF3D7_1451900 PE=4 SV=1	1	20	1029	0	83.84	5.31e-21	42	0.000217729	5.31e-21	27.8755	9	1	1
PF3D7_1145100	Q8IHR6	PF11_0463	tr|Q8IHR6|Q8IHR6_PLAF7 Coatomer subunit gamma OS=Plasmodium falciparum (isolate 3D7) OX=36329 GN=PF3D7_1145100 PE=3 SV=1	1	16	1068	0	323.31	1.92e-14	526	0.0027268	1.92e-14	4.48439	9	1	1
PF3D7_1129000	Q8II73	PF11_0301	tr|Q8II73|Q8II73_PLAF7 Spermidine synthase OS=Plasmodium falciparum (isolate 3D7) OX=36329 GN=PF3D7_1129000 PE=1 SV=1	1	8	321	0	72.907	1.62e-10	1034	0.00536029	1.62e-10	3.02919	9	1	1
PF3D7_1358200	C0H5I8	MAL13P1.286	tr|C0H5I8|C0H5I8_PLAF7 Uncharacterized protein OS=Plasmodium falciparum (isolate 3D7) OX=36329 GN=PF3D7_1358200 PE=4 SV=1	1	23	1596	0	136.16	5.08e-11	968	0.00501814	5.08e-11	27.9285	9	1	1
PF3D7_0321800	O97292	PFC0965w	tr|O97292|O97292_PLAF7 WD repeat-containing protein, putative OS=Plasmodium falciparum (isolate 3D7) OX=36329 GN=PF3D7_0321800 PE=4 SV=1	1	29	2706	0	141.37	8.96e-11	1004	0.00520477	8.96e-11	27.5428	9	1	1
PF3D7_0306200	O97244	PFC0270w	tr|O97244|O97244_PLAF7 Activator of Hsp90 ATPase OS=Plasmodium falciparum (isolate 3D7) OX=36329 GN=PF3D7_0306200 PE=4 SV=3	1	11	349	0	82.537	2.99e-19	83	0.000430275	2.99e-19	4.67015	9	1	1
PF3D7_1138800	Q8IHX6	PF11_0400	tr|Q8IHX6|Q8IHX6_PLAF7 WD repeat-containing protein, putative OS=Plasmodium falciparum (isolate 3D7) OX=36329 GN=PF3D7_1138800 PE=4 SV=2	1	18	1920	0	239.32	1.65e-13	659	0.00341628	1.65e-13	27.7921	9	1	1
PF3D7_1250600	Q8I4S8	PFL2430c	tr|Q8I4S8|Q8I4S8_PLAF7 Translation initiation factor eIF-2B subunit beta, putative OS=Plasmodium falciparum (isolate 3D7) OX=36329 GN=PF3D7_1250600 PE=3 SV=1	1	15	679	0	291.03	8.2e-14	621	0.00321929	8.2e-14	28.7134	9	1	1
PF3D7_1346300	Q8IDN4	MAL13P1.233	tr|Q8IDN4|Q8IDN4_PLAF7 DNA/RNA-binding protein Alba 2 OS=Plasmodium falciparum (isolate 3D7) OX=36329 GN=PF3D7_1346300 PE=4 SV=1	1	10	211	0	39.534	1.23e-05	1362	0.00706065	1.23e-05	1.92998	9	1	1
PF3D7_1364500	Q8ID62	PF13_0340	tr|Q8ID62|Q8ID62_PLAF7 Exosome complex component RRP45, putative OS=Plasmodium falciparum (isolate 3D7) OX=36329 GN=PF3D7_1364500 PE=4 SV=1	1	12	477	0	152.37	5.51e-10	1100	0.00570244	5.51e-10	28.6141	9	1	1
PF3D7_1126200	Q8IIA2	PF11_0272	tr|Q8IIA2|Q8IIA2_PLAF7 40S ribosomal protein S18, putative OS=Plasmodium falciparum (isolate 3D7) OX=36329 GN=PF3D7_1126200 PE=1 SV=1	1	6	156	0	118.35	3.63e-11	947	0.00490928	3.63e-11	2.57976	9	1	1
PF3D7_0822900	Q8IB63	PF08_0035	tr|Q8IB63|Q8IB63_PLAF7 Uncharacterized protein OS=Plasmodium falciparum (isolate 3D7) OX=36329 GN=PF3D7_0822900 PE=4 SV=1	1	15	1176	0	227.95	6.18e-18	152	0.000787973	6.18e-18	28.7876	9	1	1
PF3D7_1242800	Q8I501	PFL2060c	tr|Q8I501|Q8I501_PLAF7 Rab GDP dissociation inhibitor OS=Plasmodium falciparum (isolate 3D7) OX=36329 GN=PF3D7_1242800 PE=1 SV=1	1	19	459	0	82.816	8.62e-09	1223	0.00634007	8.62e-09	3.32641	9	1	1
PF3D7_1434200	A0A144A1Y0;P62203	PF14_0323	tr|A0A144A1Y0|A0A144A1Y0_PLAF7 Calmodulin OS=Plasmodium falciparum (isolate 3D7) OX=36329 GN=PF3D7_1434200 PE=3 SV=1;sp|P62203|CALM_PLAF7 Calmodulin OS=Plasmodium falciparum (isolate 3D7) OX=36329 GN=PF14_0323 PE=3 SV=2	2	10	149	0	155.44	2.51e-05	1372	0.00711249	2.51e-05	2.53708	9	1	1
PF3D7_1206600	Q8I5X9	PFL0330c	tr|Q8I5X9|Q8I5X9_PLAF7 DNA-directed RNA polymerase subunit beta OS=Plasmodium falciparum (isolate 3D7) OX=36329 GN=PF3D7_1206600 PE=3 SV=1	1	25	1450	0	121.66	2.51e-12	811	0.00420425	2.51e-12	27.6117	9	1	1
PF3D7_1450100	Q8IKX4	PF14_0477	tr|Q8IKX4|Q8IKX4_PLAF7 Signal recognition particle 54 kDa protein OS=Plasmodium falciparum (isolate 3D7) OX=36329 GN=PF3D7_1450100 PE=3 SV=1	1	15	500	0	69.671	5.71e-16	331	0.00171591	5.71e-16	5.094	9	1	1
PF3D7_1013900	Q8IJQ6	PF10_0136	tr|Q8IJQ6|Q8IJQ6_PLAF7 Translation initiation factor eIF-2B subunit delta, putative OS=Plasmodium falciparum (isolate 3D7) OX=36329 GN=PF3D7_1013900 PE=3 SV=1	1	19	1074	0	75.709	4.38e-14	577	0.00299119	4.38e-14	28.3519	9	1	1
PF3D7_1442300	Q8IL48	PF14_0401	tr|Q8IL48|Q8IL48_PLAF7 tRNA import protein tRIP OS=Plasmodium falciparum (isolate 3D7) OX=36329 GN=PF3D7_1442300 PE=4 SV=1	1	13	402	0	11	2.21e-11	921	0.0047745	2.21e-11	4.24029	9	1	1
PF3D7_1325100	Q8IE67	PF13_0143	tr|Q8IE67|Q8IE67_PLAF7 Phosphoribosylpyrophosphate synthetase OS=Plasmodium falciparum (isolate 3D7) OX=36329 GN=PF3D7_1325100 PE=4 SV=1	1	13	437	0	137.32	7.27e-19	102	0.000528771	7.27e-19	2.73815	9	1	1
PF3D7_0904600	Q8I3A3	PFI0225w	tr|Q8I3A3|Q8I3A3_PLAF7 Ubiquitin specific protease, putative OS=Plasmodium falciparum (isolate 3D7) OX=36329 GN=PF3D7_0904600 PE=3 SV=1	1	11	1770	0	29.973	1.35e-16	267	0.00138414	1.35e-16	29.71	9	1	1
PF3D7_0619500	C6KT35	PfACS12	tr|C6KT35|C6KT35_PLAF7 Acyl-CoA synthetase OS=Plasmodium falciparum (isolate 3D7) OX=36329 GN=PF3D7_0619500 PE=4 SV=1	1	25	1392	0	138.57	7.72e-23	11	5.7e-05	7.72e-23	3.59085	9	1	1
PF3D7_1107300	Q8IIS9	PF11_0086	tr|Q8IIS9|Q8IIS9_PLAF7 Polyadenylate-binding protein-interacting protein 1, putative OS=Plasmodium falciparum (isolate 3D7) OX=36329 GN=PF3D7_1107300 PE=4 SV=1	1	18	3334	0	250.3	3.19e-17	211	0.00109383	3.19e-17	4.63681	9	1	1
PF3D7_0617200	C6KT13	PFF0835w	tr|C6KT13|C6KT13_PLAF7 Uncharacterized protein OS=Plasmodium falciparum (isolate 3D7) OX=36329 GN=PF3D7_0617200 PE=4 SV=1	1	11	446	0	32.426	3.85e-06	1342	0.00695697	3.85e-06	2.47888	9	1	1
PF3D7_1309100	Q8IEM3	PF13_0049	tr|Q8IEM3|Q8IEM3_PLAF7 60S ribosomal protein L24, putative OS=Plasmodium falciparum (isolate 3D7) OX=36329 GN=PF3D7_1309100 PE=1 SV=1	1	5	162	0	2.911	1.45e-18	117	0.000606532	1.45e-18	29.5844	9	1	1
PF3D7_1226300	Q8I5F4	PFL1270w	tr|Q8I5F4|Q8I5F4_PLAF7 Haloacid dehalogenase-like hydrolase, putative OS=Plasmodium falciparum (isolate 3D7) OX=36329 GN=PF3D7_1226300 PE=4 SV=1	1	15	295	0	35.897	0.000374934	1400	0.00725765	0.000374934	2.15153	9	1	1
PF3D7_1320800	Q8IEA6	PF13_0121	tr|Q8IEA6|Q8IEA6_PLAF7 Dihydrolipoyllysine-residue succinyltransferase component of 2-oxoglutarate dehydrogenase complex OS=Plasmodium falciparum (isolate 3D7) OX=36329 GN=PF3D7_1320800 PE=4 SV=1	1	9	421	0	285.64	3.49e-10	1074	0.00556765	3.49e-10	3.81413	9	1	1
PF3D7_0403700	Q8I1Z2	PFD0180c	tr|Q8I1Z2|Q8I1Z2_PLAF7 Pre-mRNA-splicing factor CLF1, putative OS=Plasmodium falciparum (isolate 3D7) OX=36329 GN=PF3D7_0403700 PE=4 SV=1	1	17	780	0	171.69	4.12e-16	312	0.00161742	4.12e-16	27.5476	9	1	1
PF3D7_0719700	Q8IBQ5	PF07_0080	tr|Q8IBQ5|Q8IBQ5_PLAF7 40S ribosomal protein S10, putative OS=Plasmodium falciparum (isolate 3D7) OX=36329 GN=PF3D7_0719700 PE=1 SV=1	1	6	137	0	52.27	2.66e-10	1064	0.00551581	2.66e-10	3.86482	9	1	1
PF3D7_1147300	Q8IHP7	PF11_0482	tr|Q8IHP7|Q8IHP7_PLAF7 Uncharacterized protein OS=Plasmodium falciparum (isolate 3D7) OX=36329 GN=PF3D7_1147300 PE=4 SV=1	1	10	1361	0	62.092	1.07e-11	882	0.00457232	1.07e-11	30.0629	9	1	1
PF3D7_1006700	Q8IJX4	PF10_0067	tr|Q8IJX4|Q8IJX4_PLAF7 Uncharacterized protein OS=Plasmodium falciparum (isolate 3D7) OX=36329 GN=PF3D7_1006700 PE=4 SV=2	1	10	383	0	24.873	4.32e-16	314	0.00162779	4.32e-16	30.1368	9	1	1
PF3D7_0810600	Q8IAU1	PF08_0096	tr|Q8IAU1|Q8IAU1_PLAF7 ATP-dependent RNA helicase DBP1, putative OS=Plasmodium falciparum (isolate 3D7) OX=36329 GN=PF3D7_0810600 PE=4 SV=1	1	17	941	0	46.922	2.52e-12	812	0.00420944	2.52e-12	3.65564	9	1	1
PF3D7_1244600	Q8I4Y5	PFL2140c	tr|Q8I4Y5|Q8I4Y5_PLAF7 ADP-ribosylation factor GTPase-activating protein OS=Plasmodium falciparum (isolate 3D7) OX=36329 GN=PF3D7_1244600 PE=1 SV=1	1	8	332	0	323.31	1e-15	352	0.00182478	1e-15	5.20918	9	1	1
PF3D7_1007900	Q8IJW4	PF10_0077	tr|Q8IJW4|Q8IJW4_PLAF7 Eukaryotic translation initiation factor 3 subunit D OS=Plasmodium falciparum (isolate 3D7) OX=36329 GN=PF3D7_1007900 PE=3 SV=1	1	16	543	0	61.975	4.22e-09	1201	0.00622602	4.22e-09	2.13006	9	1	1
PF3D7_1417200	Q8ILS4	PF14_0170	tr|Q8ILS4|Q8ILS4_PLAF7 NOT family protein, putative OS=Plasmodium falciparum (isolate 3D7) OX=36329 GN=PF3D7_1417200 PE=4 SV=1	1	22	4466	0	142.89	8.84e-15	473	0.00245205	8.84e-15	27.9781	9	1	1
PF3D7_1323400	Q8IE82	PF13_0132	tr|Q8IE82|Q8IE82_PLAF7 60S ribosomal protein L23 OS=Plasmodium falciparum (isolate 3D7) OX=36329 GN=PF3D7_1323400 PE=1 SV=1	1	9	190	0	25.408	1.67e-15	378	0.00195956	1.67e-15	2.72418	9	1	1
PF3D7_1440700	Q8IL63	PF14_0386	tr|Q8IL63|Q8IL63_PLAF7 AP-3 complex subunit mu, putative OS=Plasmodium falciparum (isolate 3D7) OX=36329 GN=PF3D7_1440700 PE=3 SV=1	1	10	733	0	61.667	6.91e-17	238	0.0012338	6.91e-17	28.0694	9	1	1
PF3D7_0418700	Q8I1Q0	PFD0905w	tr|Q8I1Q0|Q8I1Q0_PLAF7 RNA-binding protein NOB1, putative OS=Plasmodium falciparum (isolate 3D7) OX=36329 GN=PF3D7_0418700 PE=3 SV=1	1	9	569	0	29.535	5.49e-09	1211	0.00627786	5.49e-09	29.3317	9	1	1
PF3D7_0310700	O77358	PFC0445w	tr|O77358|O77358_PLAF7 Trafficking protein particle complex subunit OS=Plasmodium falciparum (isolate 3D7) OX=36329 GN=PF3D7_0310700 PE=3 SV=2	1	8	145	0	39.938	8.6e-13	755	0.00391395	8.6e-13	29.2032	9	1	1
PF3D7_1204300	Q8I603	PFL0210c	tr|Q8I603|Q8I603_PLAF7 Eukaryotic translation initiation factor 5A OS=Plasmodium falciparum (isolate 3D7) OX=36329 GN=PF3D7_1204300 PE=3 SV=1	1	8	161	0	64.024	0.00132644	1418	0.00735096	0.00132644	1.40446	9	1	1
PF3D7_1323200	Q8IE84	PF13_0130	tr|Q8IE84|Q8IE84_PLAF7 V-type proton ATPase subunit G, putative OS=Plasmodium falciparum (isolate 3D7) OX=36329 GN=PF3D7_1323200 PE=4 SV=1	1	8	123	0	65.057	1.52e-08	1237	0.00641265	1.52e-08	4.69438	9	1	1
PF3D7_1125500	Q8IIA8	PF11_0266	tr|Q8IIA8|Q8IIA8_PLAF7 Small nuclear ribonucleoprotein Sm D1 OS=Plasmodium falciparum (isolate 3D7) OX=36329 GN=PF3D7_1125500 PE=3 SV=1	1	6	126	0	26.994	1.1e-09	1141	0.00591498	1.1e-09	29.5847	9	1	1
PF3D7_1124600	Q8IIB7	PF11_0257	tr|Q8IIB7|Q8IIB7_PLAF7 Ethanolamine kinase OS=Plasmodium falciparum (isolate 3D7) OX=36329 GN=PF3D7_1124600 PE=4 SV=1	1	15	423	0	107.73	6.49e-14	603	0.00312597	6.49e-14	3.06634	9	1	1
PF3D7_1210600	Q8I5U3	PFL0530c	tr|Q8I5U3|Q8I5U3_PLAF7 Uncharacterized protein OS=Plasmodium falciparum (isolate 3D7) OX=36329 GN=PF3D7_1210600 PE=4 SV=1	1	14	1065	0	151.03	9.31e-11	1007	0.00522032	9.31e-11	28.1045	9	1	1
PF3D7_1201500	Q8I630	PFL0075w	tr|Q8I630|Q8I630_PLAF7 GPN-loop GTPase, putative OS=Plasmodium falciparum (isolate 3D7) OX=36329 GN=PF3D7_1201500 PE=4 SV=1	1	13	497	0	250.8	4.48e-15	430	0.00222913	4.48e-15	28.0989	9	1	1
PF3D7_1335100	Q8IDX8	MSP7	tr|Q8IDX8|Q8IDX8_PLAF7 Merozoite surface protein 7 OS=Plasmodium falciparum (isolate 3D7) OX=36329 GN=PF3D7_1335100 PE=4 SV=1	1	12	351	0	84.309	0.00370327	1422	0.0073717	0.00370327	2.25158	9	1	1
PF3D7_0512000	Q8I3Y6	PFE0595w	sp|Q8I3Y6|PFD6_PLAF7 Probable prefoldin subunit 6 OS=Plasmodium falciparum (isolate 3D7) OX=36329 GN=PFE0595w PE=1 SV=2	1	8	119	0	77.457	2.53e-06	1337	0.00693105	2.53e-06	5.28157	9	1	1
PF3D7_0521700	Q8I3P6	PFE1085w	tr|Q8I3P6|Q8I3P6_PLAF7 ATP-dependent RNA helicase DDX1, putative OS=Plasmodium falciparum (isolate 3D7) OX=36329 GN=PF3D7_0521700 PE=4 SV=1	1	17	841	0	75.319	7.57e-18	156	0.000808709	7.57e-18	27.872	9	1	1
PF3D7_0410300	Q9U0I5	PFD0505c	tr|Q9U0I5|Q9U0I5_PLAF7 Protein phosphatase PPM1, putative OS=Plasmodium falciparum (isolate 3D7) OX=36329 GN=PF3D7_0410300 PE=4 SV=2	1	22	906	0	291.11	3.13e-13	698	0.00361846	3.13e-13	27.8714	9	1	1
PF3D7_1350200	Q8IDJ7	MAL13P1.253	tr|Q8IDJ7|Q8IDJ7_PLAF7 Small nuclear ribonucleoprotein E OS=Plasmodium falciparum (isolate 3D7) OX=36329 GN=PF3D7_1350200 PE=3 SV=1	1	5	93	0	84.744	1.91e-09	1163	0.00602903	1.91e-09	29.3525	9	1	1
PF3D7_1235300	Q8I569	PFL1705w	tr|Q8I569|Q8I569_PLAF7 CCR4-NOT transcription complex subunit 4, putative OS=Plasmodium falciparum (isolate 3D7) OX=36329 GN=PF3D7_1235300 PE=4 SV=1	1	8	1662	0	11.683	2.95e-13	693	0.00359253	2.95e-13	30.1905	9	1	1
PF3D7_1012900	Q8IJR6	PF10_0126	tr|Q8IJR6|Q8IJR6_PLAF7 Autophagy-related protein 18 OS=Plasmodium falciparum (isolate 3D7) OX=36329 GN=PF3D7_1012900 PE=4 SV=1	1	14	380	0	189.88	1.74e-09	1160	0.00601348	1.74e-09	4.70447	9	1	1
PF3D7_0407800	Q9U0K8	PFD0385w	tr|Q9U0K8|Q9U0K8_PLAF7 Protein CINCH OS=Plasmodium falciparum (isolate 3D7) OX=36329 GN=PF3D7_0407800 PE=4 SV=1	1	20	1960	0	172.49	1.41e-12	780	0.00404355	1.41e-12	27.799	9	1	1
PF3D7_0923900	Q8I2R8	PFI1175c	tr|Q8I2R8|Q8I2R8_PLAF7 Polyadenylate-binding protein 2, putative OS=Plasmodium falciparum (isolate 3D7) OX=36329 GN=PF3D7_0923900 PE=4 SV=1	1	7	202	0	237.5	3.46e-20	56	0.000290306	3.46e-20	3.66444	9	1	1
PF3D7_1211700	Q8I5T4;Q8I5T7	PFL0580w	tr|Q8I5T4|Q8I5T4_PLAF7 DNA replication licensing factor MCM5, putative OS=Plasmodium falciparum (isolate 3D7) OX=36329 GN=PF3D7_1211700 PE=3 SV=1	2	17	758	0	105.72	7.28e-22	21	0.000108865	7.28e-22	3.60628	9	1	1
PF3D7_0912900	Q8I323	PFI0630w	tr|Q8I323|Q8I323_PLAF7 26S proteasome regulatory subunit RPN8, putative OS=Plasmodium falciparum (isolate 3D7) OX=36329 GN=PF3D7_0912900 PE=4 SV=1	1	9	338	0	81.536	1.37e-12	779	0.00403836	1.37e-12	4.99837	9	1	1
PF3D7_0218500	O96265	PFB0865w	tr|O96265|O96265_PLAF7 Small nuclear ribonucleoprotein Sm D2 OS=Plasmodium falciparum (isolate 3D7) OX=36329 GN=PF3D7_0218500 PE=3 SV=1	1	7	101	0	59.203	2.41e-08	1252	0.00649041	2.41e-08	5.78039	9	1	1
PF3D7_1403900	Q8IM55	PF14_0036	tr|Q8IM55|Q8IM55_PLAF7 Serine/threonine protein phosphatase CPPED1, putative OS=Plasmodium falciparum (isolate 3D7) OX=36329 GN=PF3D7_1403900 PE=4 SV=2	1	7	298	0	69.871	2.35e-11	926	0.00480041	2.35e-11	3.83475	9	1	1
PF3D7_1352700	Q8IDH3	PF13_0273	tr|Q8IDH3|Q8IDH3_PLAF7 Intron-binding protein aquarius, putative OS=Plasmodium falciparum (isolate 3D7) OX=36329 GN=PF3D7_1352700 PE=4 SV=1	1	23	2533	0	61.757	2.07e-21	32	0.000165889	2.07e-21	27.4881	9	1	1
PF3D7_0920700	Q8I2U6	PFI1015w	tr|Q8I2U6|Q8I2U6_PLAF7 CRAL/TRIO domain-containing protein, putative OS=Plasmodium falciparum (isolate 3D7) OX=36329 GN=PF3D7_0920700 PE=4 SV=1	1	14	593	0	113.29	7.64e-13	749	0.00388284	7.64e-13	28.3331	9	1	1
PF3D7_1360900.1	C0H5J5	MAL13P1.303	tr|C0H5J5|C0H5J5_PLAF7 RNA-binding protein, putative OS=Plasmodium falciparum (isolate 3D7) OX=36329 GN=PF3D7_1360900.1 PE=4 SV=2	1	7	389	0	119	1.17e-16	260	0.00134785	1.17e-16	29.0357	9	1	1
PF3D7_0607600	C6KSS4	PFF0375c	tr|C6KSS4|C6KSS4_PLAF7 Spindle assembly abnormal protein 6, putative OS=Plasmodium falciparum (isolate 3D7) OX=36329 GN=PF3D7_0607600 PE=4 SV=1	1	4	861	0	9.9655	1.31e-09	1148	0.00595127	1.31e-09	29.9549	9	1	1
PF3D7_1206800	Q8I5X7	PFL0340w	tr|Q8I5X7|Q8I5X7_PLAF7 Uncharacterized protein OS=Plasmodium falciparum (isolate 3D7) OX=36329 GN=PF3D7_1206800 PE=4 SV=1	1	14	727	0	161.3	5.67e-18	148	0.000767237	5.67e-18	3.77638	9	1	1
PF3D7_1103700	Q8IIW5	PF11_0048	tr|Q8IIW5|Q8IIW5_PLAF7 Casein kinase II subunit beta OS=Plasmodium falciparum (isolate 3D7) OX=36329 GN=PF3D7_1103700 PE=3 SV=1	1	7	245	0	40.647	2.4e-11	927	0.0048056	2.4e-11	5.13976	9	1	1
PF3D7_0815200	Q8IAY9	PF08_0069	tr|Q8IAY9|Q8IAY9_PLAF7 Importin subunit beta, putative OS=Plasmodium falciparum (isolate 3D7) OX=36329 GN=PF3D7_0815200 PE=4 SV=1	1	15	877	0	209.45	1.7e-14	519	0.00269051	1.7e-14	3.90991	9	1	1
PF3D7_0310500	O77360	PFC0440c	tr|O77360|O77360_PLAF7 ATP-dependent RNA helicase DHX57, putative OS=Plasmodium falciparum (isolate 3D7) OX=36329 GN=PF3D7_0310500 PE=4 SV=1	1	26	2269	0	205	4.01e-20	57	0.00029549	4.01e-20	27.5957	9	1	1
PF3D7_0705500	Q8IC15	PF07_0024	tr|Q8IC15|Q8IC15_PLAF7 Inositol-phosphate phosphatase, putative OS=Plasmodium falciparum (isolate 3D7) OX=36329 GN=PF3D7_0705500 PE=4 SV=1	1	24	2814	0	208.49	1.72e-21	26	0.000134785	1.72e-21	27.3368	9	1	1
PF3D7_0512600	A0A5K1K8H7		tr|A0A5K1K8H7|A0A5K1K8H7_PLAF7 Ras-related protein Rab-1B OS=Plasmodium falciparum (isolate 3D7) OX=36329 GN=PF3D7_0512600 PE=4 SV=1	1	8	200	0	83.67	3.12e-09	1185	0.00614308	3.12e-09	2.9795	9	1	1
PF3D7_1016200	Q8IJN4	PF10_0158	tr|Q8IJN4|Q8IJN4_PLAF7 Rab3 GTPase-activating protein non-catalytic subunit, putative OS=Plasmodium falciparum (isolate 3D7) OX=36329 GN=PF3D7_1016200 PE=4 SV=1	1	11	560	0	77.449	8.8e-12	870	0.00451011	8.8e-12	28.3974	9	1	1
PF3D7_0708100	Q8IC08	PF07_0027	tr|Q8IC08|Q8IC08_PLAF7 DNA-directed RNA polymerases I, II, and III subunit RPABC5, putative OS=Plasmodium falciparum (isolate 3D7) OX=36329 GN=PF3D7_0708100 PE=3 SV=1	1	4	69	0	47.05	3.7e-10	1079	0.00559357	3.7e-10	29.1272	9	1	1
PF3D7_0312400	O77344	PfGSK-3	tr|O77344|O77344_PLAF7 Glycogen synthase kinase 3 OS=Plasmodium falciparum (isolate 3D7) OX=36329 GN=PF3D7_0312400 PE=3 SV=2	1	14	440	0	40.885	9.21e-19	105	0.000544323	9.21e-19	4.29439	9	1	1
PF3D7_1361100	C0H5J6	PF13_0324	tr|C0H5J6|C0H5J6_PLAF7 Protein transport protein Sec24A OS=Plasmodium falciparum (isolate 3D7) OX=36329 GN=PF3D7_1361100 PE=4 SV=1	1	12	940	0	72.903	2.2e-15	393	0.00203732	2.2e-15	4.17644	9	1	1
PF3D7_1340600	A0A5K1K8J0		tr|A0A5K1K8J0|A0A5K1K8J0_PLAF7 RNA lariat debranching enzyme, putative OS=Plasmodium falciparum (isolate 3D7) OX=36329 GN=PF3D7_1340600 PE=4 SV=1	1	11	575	0	41.101	1.95e-13	665	0.00344738	1.95e-13	3.74328	9	1	1
PF3D7_1342800	Q8IDR1	PEPCK	tr|Q8IDR1|Q8IDR1_PLAF7 Phosphoenolpyruvate carboxykinase OS=Plasmodium falciparum (isolate 3D7) OX=36329 GN=PF3D7_1342800 PE=3 SV=1	1	15	583	0	249.89	6.09e-15	444	0.00230171	6.09e-15	28.2641	9	1	1
PF3D7_0320800	O97285	PFC0915w	tr|O97285|O97285_PLAF7 ATP-dependent RNA helicase DDX6 OS=Plasmodium falciparum (isolate 3D7) OX=36329 GN=PF3D7_0320800 PE=3 SV=1	1	16	433	0	43.729	6.99e-09	1218	0.00631415	6.99e-09	4.90386	9	1	1
PF3D7_0217500	A0A143ZWW4;P62344	CPK1	tr|A0A143ZWW4|A0A143ZWW4_PLAF7 Calcium-dependent protein kinase 1 OS=Plasmodium falciparum (isolate 3D7) OX=36329 GN=PF3D7_0217500 PE=4 SV=1;sp|P62344|CDPK1_PLAF7 Calcium-dependent protein kinase 1 OS=Plasmodium falciparum (isolate 3D7) OX=36329 GN=CPK1 PE	2	17	524	0	30.401	7.13e-13	742	0.00384655	7.13e-13	3.81386	9	1	1
PF3D7_1453700	Q8IKU1	SBA1	tr|Q8IKU1|Q8IKU1_PLAF7 HSP90 co-chaperone p23 OS=Plasmodium falciparum (isolate 3D7) OX=36329 GN=PF3D7_1453700 PE=4 SV=2	1	5	275	0	62.65	1.8e-11	910	0.00471747	1.8e-11	4.16775	9	1	1
PF3D7_1329000	Q8IE49	PF13_0150	tr|Q8IE49|Q8IE49_PLAF7 DNA-directed RNA polymerase subunit OS=Plasmodium falciparum (isolate 3D7) OX=36329 GN=PF3D7_1329000 PE=3 SV=1	1	27	2356	0	65.205	2.34e-14	539	0.00279419	2.34e-14	27.3386	9	1	1
PF3D7_0517300	Q8I3T5	PFE0865c	tr|Q8I3T5|Q8I3T5_PLAF7 Serine/arginine-rich splicing factor 1 OS=Plasmodium falciparum (isolate 3D7) OX=36329 GN=PF3D7_0517300 PE=1 SV=2	1	8	298	0	57.608	2.64e-09	1176	0.00609642	2.64e-09	2.82079	9	1	1
PF3D7_1310800	Q8IEK8	MAL13P1.52	tr|Q8IEK8|Q8IEK8_PLAF7 Tetratricopeptide repeat protein, putative OS=Plasmodium falciparum (isolate 3D7) OX=36329 GN=PF3D7_1310800 PE=4 SV=1	1	24	1385	0	151.86	2.38e-23	5	2.59e-05	2.38e-23	27.4476	9	1	1
PF3D7_0319600	O97319	PFC0870w	tr|O97319|O97319_PLAF7 Elongation factor 1-delta, putative OS=Plasmodium falciparum (isolate 3D7) OX=36329 GN=PF3D7_0319600 PE=4 SV=2	1	6	156	0	90.931	1.11e-05	1359	0.0070451	1.11e-05	2.94256	9	1	1
PF3D7_0921600	Q8I2T7	PFI1060w	tr|Q8I2T7|Q8I2T7_PLAF7 Tetratricopeptide repeat protein, putative OS=Plasmodium falciparum (isolate 3D7) OX=36329 GN=PF3D7_0921600 PE=4 SV=1	1	23	1650	0	37.218	3.45e-15	419	0.00217211	3.45e-15	27.3456	9	1	1
PF3D7_0623000	C6KT66	PfCS	tr|C6KT66|C6KT66_PLAF7 Chorismate synthase OS=Plasmodium falciparum (isolate 3D7) OX=36329 GN=PF3D7_0623000 PE=3 SV=1	1	14	527	0	192.72	3.07e-13	697	0.00361327	3.07e-13	28.2875	9	1	1
PF3D7_1345700	Q8I6T2	PF13_0242	tr|Q8I6T2|Q8I6T2_PLAF7 Isocitrate dehydrogenase [NADP] OS=Plasmodium falciparum (isolate 3D7) OX=36329 GN=PF3D7_1345700 PE=3 SV=1	1	17	468	0	39.555	3.49e-09	1190	0.006169	3.49e-09	1.75642	9	1	1
PF3D7_0416400	C0H4A7	PFD0795w	tr|C0H4A7|C0H4A7_PLAF7 Histone acetyltransferase, putative OS=Plasmodium falciparum (isolate 3D7) OX=36329 GN=PF3D7_0416400 PE=4 SV=1	1	18	1259	0	85.608	1.61e-19	73	0.000378434	1.61e-19	27.5351	9	1	1
PF3D7_1304500	Q8IES0	PF13_0021	tr|Q8IES0|Q8IES0_PLAF7 Small heat shock protein, putative OS=Plasmodium falciparum (isolate 3D7) OX=36329 GN=PF3D7_1304500 PE=3 SV=1	1	10	211	0	58.366	6.44e-10	1110	0.00575428	6.44e-10	3.74946	9	1	1
PF3D7_1213700	Q8I5R8	PFL0665c	tr|Q8I5R8|Q8I5R8_PLAF7 DNA-directed RNA polymerases I, II, and III subunit RPABC3 OS=Plasmodium falciparum (isolate 3D7) OX=36329 GN=PF3D7_1213700 PE=3 SV=1	1	7	145	0	96.956	6.02e-07	1314	0.00681182	6.02e-07	28.7291	9	1	1
PF3D7_0605100	C6KSP9	PFF0250w	tr|C6KSP9|C6KSP9_PLAF7 RNA-binding protein, putative OS=Plasmodium falciparum (isolate 3D7) OX=36329 GN=PF3D7_0605100 PE=4 SV=1	1	21	755	0	102.96	1.32e-14	498	0.00258165	1.32e-14	3.96477	9	1	1
PF3D7_1251200	Q8I4S2	PFL2460w	tr|Q8I4S2|Q8I4S2_PLAF7 Coronin OS=Plasmodium falciparum (isolate 3D7) OX=36329 GN=PF3D7_1251200 PE=3 SV=1	1	18	602	0	125.48	6.1e-08	1272	0.00659409	6.1e-08	2.32187	9	1	1
PF3D7_1456700	Q8IKR2	PF14_0540	tr|Q8IKR2|Q8IKR2_PLAF7 Uncharacterized protein OS=Plasmodium falciparum (isolate 3D7) OX=36329 GN=PF3D7_1456700 PE=4 SV=1	1	17	684	0	85.71	1.84e-07	1291	0.00669259	1.84e-07	3.37929	9	1	1
PF3D7_1012600	Q8IJR9	PF10_0123	tr|Q8IJR9|Q8IJR9_PLAF7 GMP synthase [glutamine-hydrolyzing] OS=Plasmodium falciparum (isolate 3D7) OX=36329 GN=PF3D7_1012600 PE=1 SV=1	1	17	555	0	89.929	2.04e-10	1046	0.0054225	2.04e-10	2.77355	9	1	1
PF3D7_1342600	Q8IDR3	PF13_0233	sp|Q8IDR3|MYOA_PLAF7 Myosin-A OS=Plasmodium falciparum (isolate 3D7) OX=36329 GN=PF13_0233 PE=1 SV=1	1	23	818	0	323.31	2.63e-10	1061	0.00550026	2.63e-10	3.24425	9	1	1
PF3D7_1461900	Q8IKL5	PF14_0589	tr|Q8IKL5|Q8IKL5_PLAF7 Valine--tRNA ligase, putative OS=Plasmodium falciparum (isolate 3D7) OX=36329 GN=PF3D7_1461900 PE=3 SV=1	1	21	1090	0	93.879	2.25e-10	1053	0.00545879	2.25e-10	2.90836	9	1	1
PF3D7_0607000	C6KSR8	PFF0345w	tr|C6KSR8|C6KSR8_PLAF7 Translation initiation factor IF-2, putative OS=Plasmodium falciparum (isolate 3D7) OX=36329 GN=PF3D7_0607000 PE=4 SV=1	1	21	977	0	214.45	6.1e-17	232	0.0012027	6.1e-17	4.14688	9	1	1
PF3D7_1319400	A0A5K1K826		tr|A0A5K1K826|A0A5K1K826_PLAF7 Uncharacterized protein OS=Plasmodium falciparum (isolate 3D7) OX=36329 GN=PF3D7_1319400 PE=4 SV=1	1	10	1070	0	172.6	1.98e-09	1164	0.00603421	1.98e-09	28.543	9	1	1
PF3D7_0723800	Q8IBL5	PF07_0101	tr|Q8IBL5|Q8IBL5_PLAF7 Uncharacterized protein OS=Plasmodium falciparum (isolate 3D7) OX=36329 GN=PF3D7_0723800 PE=4 SV=1	1	20	2190	0	30.505	2.91e-21	37	0.000191809	2.91e-21	27.6116	9	1	1
PF3D7_0312300	O77345	PFC0520w	tr|O77345|O77345_PLAF7 26S proteasome regulatory subunit RPN12, putative OS=Plasmodium falciparum (isolate 3D7) OX=36329 GN=PF3D7_0312300 PE=4 SV=1	1	7	304	0	121.92	5.71e-12	848	0.00439606	5.71e-12	29.3108	9	1	1
PF3D7_0630600	C6KTE1	PFF1485w	tr|C6KTE1|C6KTE1_PLAF7 DUF4205 domain-containing protein OS=Plasmodium falciparum (isolate 3D7) OX=36329 GN=PF3D7_0630600 PE=4 SV=2	1	11	935	0	25.491	8.32e-25	1	5.18e-06	8.32e-25	28.0097	9	1	1
PF3D7_0917600	Q8I2X7;Q8IJA4	PFI0860c	tr|Q8I2X7|Q8I2X7_PLAF7 Pre-mRNA-splicing factor ATP-dependent RNA helicase PRP43, putative OS=Plasmodium falciparum (isolate 3D7) OX=36329 GN=PF3D7_0917600 PE=4 SV=1	2	18	820	0	66.37	2.13e-14	532	0.00275791	2.13e-14	27.4255	9	1	1
PF3D7_1422800	Q8ILM5	PF14_0218	tr|Q8ILM5|Q8ILM5_PLAF7 Actin-related protein, putative OS=Plasmodium falciparum (isolate 3D7) OX=36329 GN=PF3D7_1422800 PE=3 SV=1	1	14	522	0	166.46	1.02e-13	637	0.00330223	1.02e-13	4.66746	9	1	1
PF3D7_0510100	Q8I403	PFE0500c	tr|Q8I403|Q8I403_PLAF7 Uncharacterized protein OS=Plasmodium falciparum (isolate 3D7) OX=36329 GN=PF3D7_0510100 PE=4 SV=1	1	18	2535	0	166.61	3.42e-22	18	9.33e-05	3.42e-22	27.9151	9	1	1
PF3D7_1347700	Q8IDM2	PF13_0253	tr|Q8IDM2|Q8IDM2_PLAF7 Ethanolamine-phosphate cytidylyltransferase OS=Plasmodium falciparum (isolate 3D7) OX=36329 GN=PF3D7_1347700 PE=4 SV=1	1	12	573	0	128.01	1.84e-20	52	0.00026957	1.84e-20	4.23035	9	1	1
PF3D7_1428300	Q8ILI2	PF14_0261	tr|Q8ILI2|Q8ILI2_PLAF7 Proliferation-associated protein 2g4, putative OS=Plasmodium falciparum (isolate 3D7) OX=36329 GN=PF3D7_1428300 PE=4 SV=1	1	11	377	0	5.0535	2.72e-05	1374	0.00712286	2.72e-05	1.97426	9	1	1
PF3D7_1465100	Q8IKI7	PF14_0618	tr|Q8IKI7|Q8IKI7_PLAF7 Conserved oligomeric Golgi complex subunit 6 OS=Plasmodium falciparum (isolate 3D7) OX=36329 GN=PF3D7_1465100 PE=3 SV=1	1	16	867	0	50.147	2.54e-12	813	0.00421462	2.54e-12	28.3165	9	1	1
PF3D7_0212900	O96210	PFB0585w	tr|O96210|O96210_PLAF7 Arginyl-tRNA--protein transferase OS=Plasmodium falciparum (isolate 3D7) OX=36329 GN=PF3D7_0212900 PE=4 SV=1	1	9	365	0	60.202	6.42e-17	233	0.00120788	6.42e-17	4.30844	9	1	1
PF3D7_1323100	Q8IE85	PF13_0129	tr|Q8IE85|Q8IE85_PLAF7 60S ribosomal protein L6, putative OS=Plasmodium falciparum (isolate 3D7) OX=36329 GN=PF3D7_1323100 PE=1 SV=1	1	7	190	0	16.398	5.47e-07	1311	0.00679627	5.47e-07	1.89626	9	1	1
PF3D7_0424600	Q8IFM0	PFD1170c	tr|Q8IFM0|Q8IFM0_PLAF7 PRESAN domain-containing protein OS=Plasmodium falciparum (isolate 3D7) OX=36329 GN=PF3D7_0424600 PE=4 SV=1	1	11	309	0	110.72	2.63e-13	686	0.00355625	2.63e-13	2.53209	9	1	1
PF3D7_0527200	Q8I3J3	PFE1355c	tr|Q8I3J3|Q8I3J3_PLAF7 Ubiquitin carboxyl-terminal hydrolase OS=Plasmodium falciparum (isolate 3D7) OX=36329 GN=PF3D7_0527200 PE=3 SV=1	1	14	605	0	147.68	4.25e-19	91	0.000471747	4.25e-19	3.86689	9	1	1
PF3D7_0923800.2	A0A143ZVU1;P61076	trxr2	tr|A0A143ZVU1|A0A143ZVU1_PLAF7 Thioredoxin reductase OS=Plasmodium falciparum (isolate 3D7) OX=36329 GN=PF3D7_0923800.2 PE=3 SV=1;sp|P61076|TRXR2_PLAF7 Thioredoxin reductase 2 OS=Plasmodium falciparum (isolate 3D7) OX=36329 GN=trxr2 PE=1 SV=2	2	14	541	0	52.57	1.53e-17	181	0.00093831	1.53e-17	3.67928	9	1	1
PF3D7_1125800	Q8IIA6	PF11_0268	tr|Q8IIA6|Q8IIA6_PLAF7 Kelch domain-containing protein, putative OS=Plasmodium falciparum (isolate 3D7) OX=36329 GN=PF3D7_1125800 PE=4 SV=2	1	14	592	0	143.63	7.48e-14	613	0.00317781	7.48e-14	27.8464	9	1	1
PF3D7_0811300	C0H4T9	MAL8P1.104	tr|C0H4T9|C0H4T9_PLAF7 CCR4-associated factor 1 OS=Plasmodium falciparum (isolate 3D7) OX=36329 GN=PF3D7_0811300 PE=4 SV=1	1	14	1774	0	42.498	1.26e-09	1145	0.00593572	1.26e-09	1.35532	9	1	1
PF3D7_1314100	Q8IEH3	MAL13P1.73	tr|Q8IEH3|Q8IEH3_PLAF7 Uncharacterized protein OS=Plasmodium falciparum (isolate 3D7) OX=36329 GN=PF3D7_1314100 PE=4 SV=1	1	16	752	0	62.62	7.72e-16	343	0.00177812	7.72e-16	27.8869	9	1	1
PF3D7_0822300	Q8IB57	MAL8P1.48	tr|Q8IB57|Q8IB57_PLAF7 Small nuclear ribonucleoprotein G OS=Plasmodium falciparum (isolate 3D7) OX=36329 GN=PF3D7_0822300 PE=3 SV=1	1	5	83	0	27.606	1.21e-10	1016	0.00526698	1.21e-10	4.62944	9	1	1
PF3D7_0814000	Q8IAX6	PF08_0075	tr|Q8IAX6|Q8IAX6_PLAF7 60S ribosomal protein L13 OS=Plasmodium falciparum (isolate 3D7) OX=36329 GN=PF3D7_0814000 PE=1 SV=1	1	12	215	0	21.979	1.14e-05	1360	0.00705028	1.14e-05	1.88034	9	1	1
PF3D7_0212300	O96203	PFB0550w	tr|O96203|O96203_PLAF7 Peptide chain release factor subunit 1, putative OS=Plasmodium falciparum (isolate 3D7) OX=36329 GN=PF3D7_0212300 PE=4 SV=1	1	16	427	0	82.053	1.25e-17	177	0.000917574	1.25e-17	3.40192	9	1	1
PF3D7_0213100	O96212	PFB0595w	tr|O96212|O96212_PLAF7 Protein SIS1 OS=Plasmodium falciparum (isolate 3D7) OX=36329 GN=PF3D7_0213100 PE=4 SV=1	1	11	328	0	124.43	3.65e-13	707	0.00366511	3.65e-13	3.89227	9	1	1
PF3D7_0505500	Q8I447	PFE0270c	tr|Q8I447|Q8I447_PLAF7 DNA mismatch repair protein OS=Plasmodium falciparum (isolate 3D7) OX=36329 GN=PF3D7_0505500 PE=3 SV=1	1	20	1350	0	17.603	4.94e-17	227	0.00117678	4.94e-17	3.39356	9	1	1
PF3D7_0418200	Q8I1Q5	PFD0880w	tr|Q8I1Q5|Q8I1Q5_PLAF7 Eukaryotic translation initiation factor 3 subunit M OS=Plasmodium falciparum (isolate 3D7) OX=36329 GN=PF3D7_0418200 PE=3 SV=1	1	10	429	0	52.5	1.94e-13	664	0.0034422	1.94e-13	3.0595	9	1	1
PF3D7_0320500	O97284	PFC0910w	tr|O97284|O97284_PLAF7 Nicotinamidase, putative OS=Plasmodium falciparum (isolate 3D7) OX=36329 GN=PF3D7_0320500 PE=4 SV=1	1	8	429	0	91.519	3.75e-13	711	0.00368585	3.75e-13	3.82223	9	1	1
PF3D7_0807600	C0H4S8	MAL8P1.127	tr|C0H4S8|C0H4S8_PLAF7 Uncharacterized protein OS=Plasmodium falciparum (isolate 3D7) OX=36329 GN=PF3D7_0807600 PE=4 SV=1	1	13	1334	0	70.221	1.37e-12	778	0.00403318	1.37e-12	27.7071	9	1	1
PF3D7_1037500	Q8IJ32	PF10_0368	tr|Q8IJ32|Q8IJ32_PLAF7 Dynamin-like protein OS=Plasmodium falciparum (isolate 3D7) OX=36329 GN=PF3D7_1037500 PE=3 SV=1	1	16	709	0	120.16	1.06e-13	640	0.00331778	1.06e-13	27.3895	9	1	1
PF3D7_1130100	Q8II62	PF11_0312	tr|Q8II62|Q8II62_PLAF7 60S ribosomal protein L38 OS=Plasmodium falciparum (isolate 3D7) OX=36329 GN=PF3D7_1130100 PE=1 SV=1	1	4	87	0	11.459	3.21e-16	301	0.00156039	3.21e-16	3.10731	9	1	1
PF3D7_1224500	Q8I5H2	PFL1180w	tr|Q8I5H2|Q8I5H2_PLAF7 Histone chaperone ASF1, putative OS=Plasmodium falciparum (isolate 3D7) OX=36329 GN=PF3D7_1224500 PE=1 SV=1	1	8	273	0	32.962	1.11e-14	488	0.00252981	1.11e-14	4.64082	9	1	1
PF3D7_0909900	Q8I353	PFI0480w	tr|Q8I353|Q8I353_PLAF7 Helicase SKI2W, putative OS=Plasmodium falciparum (isolate 3D7) OX=36329 GN=PF3D7_0909900 PE=4 SV=1	1	18	1373	0	116.09	2.13e-21	33	0.000171073	2.13e-21	27.1976	9	1	1
PF3D7_1364000	A0A5K1K9G3		tr|A0A5K1K9G3|A0A5K1K9G3_PLAF7 Uncharacterized protein OS=Plasmodium falciparum (isolate 3D7) OX=36329 GN=PF3D7_1364000 PE=4 SV=1	1	12	827	0	176.58	2.88e-16	297	0.00153966	2.88e-16	27.6112	9	1	1
PF3D7_0109800	Q8I246	PFA_0480w	tr|Q8I246|Q8I246_PLAF7 Phenylalanine--tRNA ligase alpha subunit OS=Plasmodium falciparum (isolate 3D7) OX=36329 GN=PF3D7_0109800 PE=4 SV=1	1	11	575	0	26.156	9.69e-18	167	0.000865734	9.69e-18	4.8287	9	1	1
PF3D7_1136400	Q8II00	PF11_0375	tr|Q8II00|Q8II00_PLAF7 Signal recognition particle subunit SRP72, putative OS=Plasmodium falciparum (isolate 3D7) OX=36329 GN=PF3D7_1136400 PE=4 SV=1	1	16	886	0	96.001	2.55e-22	15	7.78e-05	2.55e-22	27.4692	9	1	1
PF3D7_1120500	Q8IIG2	PF11_0212	tr|Q8IIG2|Q8IIG2_PLAF7 tRNA nucleotidyltransferase, putative OS=Plasmodium falciparum (isolate 3D7) OX=36329 GN=PF3D7_1120500 PE=3 SV=1	1	17	791	0	65.861	5.77e-19	94	0.000487299	5.77e-19	27.3989	9	1	1
PF3D7_0302100	O77306	PFC0105w	tr|O77306|O77306_PLAF7 Serine/threonine protein kinase OS=Plasmodium falciparum (isolate 3D7) OX=36329 GN=PF3D7_0302100 PE=4 SV=1	1	16	1338	0	57.057	1.56e-11	904	0.00468637	1.56e-11	28.4128	9	1	1
PF3D7_1134800	Q8II16	PF11_0359	tr|Q8II16|Q8II16_PLAF7 Coatomer subunit delta OS=Plasmodium falciparum (isolate 3D7) OX=36329 GN=PF3D7_1134800 PE=3 SV=1	1	11	487	0	66.662	1.2e-18	111	0.000575428	1.2e-18	4.16697	9	1	1
PF3D7_1021900	Q8IJI4	PF10_0213	tr|Q8IJI4|Q8IJI4_PLAF7 PHAX domain-containing protein, putative OS=Plasmodium falciparum (isolate 3D7) OX=36329 GN=PF3D7_1021900 PE=4 SV=1	1	21	2290	0	60.965	3.49e-15	420	0.00217729	3.49e-15	3.58272	9	1	1
PF3D7_0108300	Q8I259	PFA_0410w	tr|Q8I259|Q8I259_PLAF7 Uncharacterized protein OS=Plasmodium falciparum (isolate 3D7) OX=36329 GN=PF3D7_0108300 PE=4 SV=2	1	20	2221	0	145.19	1.22e-13	649	0.00336444	1.22e-13	3.93098	9	1	1
PF3D7_0502000	Q8I480	PFE0100w	sp|Q8I480|ZNRF2_PLAF7 RING finger protein PFE0100w OS=Plasmodium falciparum (isolate 3D7) OX=36329 GN=PFE0100w PE=1 SV=1	1	14	1272	0	56.004	1.12e-17	172	0.000891654	1.12e-17	27.8281	9	1	1
PF3D7_1435500	Q8ILA9	PF14_0336	tr|Q8ILA9|Q8ILA9_PLAF7 Clathrin light chain OS=Plasmodium falciparum (isolate 3D7) OX=36329 GN=PF3D7_1435500 PE=3 SV=1	1	4	254	0	22.882	1.53e-09	1153	0.00597719	1.53e-09	29.653	9	1	1
PF3D7_1409300	Q8IM03	PF14_0090	tr|Q8IM03|Q8IM03_PLAF7 DNA damage-inducible protein 1, putative OS=Plasmodium falciparum (isolate 3D7) OX=36329 GN=PF3D7_1409300 PE=4 SV=1	1	11	382	0	52.419	1.76e-14	520	0.0026957	1.76e-14	2.95924	9	1	1
PF3D7_1307000	Q8IEP5	MAL13P1.36	tr|Q8IEP5|Q8IEP5_PLAF7 Exosome complex component RRP40, putative OS=Plasmodium falciparum (isolate 3D7) OX=36329 GN=PF3D7_1307000 PE=4 SV=1	1	7	245	0	143.71	4.13e-08	1263	0.00654743	4.13e-08	29.2238	9	1	1
PF3D7_1429400	Q8ILH0	PF14_0273	tr|Q8ILH0|Q8ILH0_PLAF7 rRNA (Adenosine-2-O-)-methyltransferase, putative OS=Plasmodium falciparum (isolate 3D7) OX=36329 GN=PF3D7_1429400 PE=4 SV=1	1	19	2779	0	126.86	2.18e-18	121	0.000627268	2.18e-18	27.3882	9	1	1
PF3D7_0307200	O97250	PFC0300c	tr|O97250|O97250_PLAF7 60S ribosomal protein L7, putative OS=Plasmodium falciparum (isolate 3D7) OX=36329 GN=PF3D7_0307200 PE=1 SV=2	1	9	257	0	54.99	1.37e-05	1364	0.00707102	1.37e-05	1.78253	9	1	1
PF3D7_0934500	Q8I2H3	PFI1670c	tr|Q8I2H3|Q8I2H3_PLAF7 V-type proton ATPase subunit E, putative OS=Plasmodium falciparum (isolate 3D7) OX=36329 GN=PF3D7_0934500 PE=3 SV=2	1	9	235	0	13.971	5.04e-07	1310	0.00679108	5.04e-07	4.12445	9	1	1
PF3D7_1306600	Q8IEP9	PF13_0034	tr|Q8IEP9|Q8IEP9_PLAF7 V-type proton ATPase subunit H OS=Plasmodium falciparum (isolate 3D7) OX=36329 GN=PF3D7_1306600 PE=3 SV=2	1	13	455	0	34.6	8.63e-15	470	0.0024365	8.63e-15	3.53497	9	1	1
PF3D7_1124300	Q8IIC0	PF11_0254	tr|Q8IIC0|Q8IIC0_PLAF7 Uncharacterized protein OS=Plasmodium falciparum (isolate 3D7) OX=36329 GN=PF3D7_1124300 PE=4 SV=1	1	10	525	0	61.162	4.03e-13	714	0.0037014	4.03e-13	28.4117	9	1	1
PF3D7_0516400	Q8I3U4	PFE0820c	tr|Q8I3U4|Q8I3U4_PLAF7 Phosducin-like protein 1, putative OS=Plasmodium falciparum (isolate 3D7) OX=36329 GN=PF3D7_0516400 PE=4 SV=1	1	10	335	0	43.081	2.18e-17	196	0.00101607	2.18e-17	27.9929	9	1	1
PF3D7_1142600	Q8IHT9	PF11_0438	tr|Q8IHT9|Q8IHT9_PLAF7 60S ribosomal protein L35ae, putative OS=Plasmodium falciparum (isolate 3D7) OX=36329 GN=PF3D7_1142600 PE=1 SV=1	1	2	140	0	2.7172	3.16e-13	699	0.00362364	3.16e-13	29.8159	9	1	1
PF3D7_1008900	Q8IJV6	PF10_0086	tr|Q8IJV6|Q8IJV6_PLAF7 Adenylate kinase OS=Plasmodium falciparum (isolate 3D7) OX=36329 GN=PF3D7_1008900 PE=3 SV=1	1	14	242	0	122.14	4.05e-05	1379	0.00714878	4.05e-05	2.05698	9	1	1
PF3D7_0621900	C6KT56	PFF1055c	tr|C6KT56|C6KT56_PLAF7 Signal recognition particle subunit SRP68, putative OS=Plasmodium falciparum (isolate 3D7) OX=36329 GN=PF3D7_0621900 PE=4 SV=1	1	14	776	0	136.51	1.04e-13	639	0.0033126	1.04e-13	4.93576	9	1	1
PF3D7_1406100	Q8IM33	PF14_0058	tr|Q8IM33|Q8IM33_PLAF7 Tubby domain-containing protein, putative OS=Plasmodium falciparum (isolate 3D7) OX=36329 GN=PF3D7_1406100 PE=3 SV=1	1	20	1361	0	80.272	1.32e-12	775	0.00401763	1.32e-12	27.4714	9	1	1
PF3D7_1210300	Q8I5U6	PFL0515w	tr|Q8I5U6|Q8I5U6_PLAF7 Uncharacterized protein OS=Plasmodium falciparum (isolate 3D7) OX=36329 GN=PF3D7_1210300 PE=4 SV=1	1	5	209	0	92.681	2.43e-10	1057	0.00547952	2.43e-10	28.7595	9	1	1
PF3D7_0413900	Q8I1U8	PFD0680c	tr|Q8I1U8|Q8I1U8_PLAF7 Ubiquitin carboxyl-terminal hydrolase OS=Plasmodium falciparum (isolate 3D7) OX=36329 GN=PF3D7_0413900 PE=3 SV=1	1	23	853	0	62.863	3.4e-17	215	0.00111457	3.4e-17	4.02101	9	1	1
PF3D7_1033600	Q7KQL1	PF10_0327	tr|Q7KQL1|Q7KQL1_PLAF7 Pre-mRNA-splicing factor CEF1, putative OS=Plasmodium falciparum (isolate 3D7) OX=36329 GN=PF3D7_1033600 PE=4 SV=1	1	18	915	0	130.94	7e-18	154	0.000798341	7e-18	27.3284	9	1	1
PF3D7_1369700	C0H5L8	PF13_0362	tr|C0H5L8|C0H5L8_PLAF7 U2 small nuclear ribonucleoprotein A, putative OS=Plasmodium falciparum (isolate 3D7) OX=36329 GN=PF3D7_1369700 PE=4 SV=1	1	10	175	0	97.738	7.19e-10	1119	0.00580093	7.19e-10	4.66864	9	1	1
PF3D7_0209100	O96176	PFB0410c	tr|O96176|O96176_PLAF7 Patatin-like phospholipase, putative OS=Plasmodium falciparum (isolate 3D7) OX=36329 GN=PF3D7_0209100 PE=4 SV=1	1	14	679	0	119.9	1.99e-17	192	0.000995334	1.99e-17	27.6142	9	1	1
PF3D7_1128500	Q8II78	PF11_0296	tr|Q8II78|Q8II78_PLAF7 Fe-S cluster assembly protein, putative OS=Plasmodium falciparum (isolate 3D7) OX=36329 GN=PF3D7_1128500 PE=4 SV=1	1	13	718	0	65.942	3.88e-14	566	0.00293416	3.88e-14	28.3303	9	1	1
PF3D7_1421200	Q8ILN8	PF14_0205	tr|Q8ILN8|Q8ILN8_PLAF7 40S ribosomal protein S25 OS=Plasmodium falciparum (isolate 3D7) OX=36329 GN=PF3D7_1421200 PE=1 SV=2	1	5	105	0	18.819	2.01e-07	1294	0.00670814	2.01e-07	2.33088	9	1	1
PF3D7_1033400	Q8IJ74	PF10_0325	tr|Q8IJ74|Q8IJ74_PLAF7 Haloacid dehalogenase-like hydrolase OS=Plasmodium falciparum (isolate 3D7) OX=36329 GN=PF3D7_1033400 PE=1 SV=1	1	8	288	0	174.14	3.89e-06	1344	0.00696734	3.89e-06	2.46961	9	1	1
PF3D7_0414000	Q8I1U7	PFD0685c	sp|Q8I1U7|SMC3_PLAF7 Structural maintenance of chromosomes protein 3 homolog OS=Plasmodium falciparum (isolate 3D7) OX=36329 GN=PFD0685c PE=1 SV=1	1	20	1193	0	90.796	1.19e-16	261	0.00135303	1.19e-16	27.0233	9	1	1
PF3D7_0626000	C6KT96	PFF1260c	tr|C6KT96|C6KT96_PLAF7 Uncharacterized protein OS=Plasmodium falciparum (isolate 3D7) OX=36329 GN=PF3D7_0626000 PE=4 SV=1	1	17	1751	0	90.151	2.38e-17	199	0.00103162	2.38e-17	27.4963	9	1	1
PF3D7_0821600	Q8IB50	PF08_0040	tr|Q8IB50|Q8IB50_PLAF7 Polyribonucleotide 5-hydroxyl-kinase Clp1, putative OS=Plasmodium falciparum (isolate 3D7) OX=36329 GN=PF3D7_0821600 PE=3 SV=1	1	15	674	0	35.657	6.89e-15	452	0.00234318	6.89e-15	27.4626	9	1	1
PF3D7_1443400	Q8IL37	PF14_0412	tr|Q8IL37|Q8IL37_PLAF7 WD repeat-containing protein OS=Plasmodium falciparum (isolate 3D7) OX=36329 GN=PF3D7_1443400 PE=4 SV=1	1	15	819	0	27.659	6.57e-14	605	0.00313634	6.57e-14	27.1214	9	1	1
PF3D7_1419000	Q8ILR0	PF14_0184	tr|Q8ILR0|Q8ILR0_PLAF7 Uncharacterized protein OS=Plasmodium falciparum (isolate 3D7) OX=36329 GN=PF3D7_1419000 PE=4 SV=1	1	10	1166	0	20.333	5.57e-16	328	0.00170036	5.57e-16	28.1594	9	1	1
PF3D7_1427500	Q8ILI9	PF14_0254	tr|Q8ILI9|Q8ILI9_PLAF7 DNA mismatch repair protein MSH2, putative OS=Plasmodium falciparum (isolate 3D7) OX=36329 GN=PF3D7_1427500 PE=4 SV=1	1	17	811	0	91.752	4.4e-18	143	0.000741317	4.4e-18	3.66734	9	1	1
PF3D7_0918300	Q8I2X0	PFI0895c	tr|Q8I2X0|Q8I2X0_PLAF7 Eukaryotic translation initiation factor 3 subunit F, putative OS=Plasmodium falciparum (isolate 3D7) OX=36329 GN=PF3D7_0918300 PE=3 SV=1	1	6	320	0	14.954	1.74e-16	276	0.00143079	1.74e-16	3.21943	9	1	1
PF3D7_0709600	C0H4M3	MAL7P1.28	tr|C0H4M3|C0H4M3_PLAF7 Ribonucleases P/MRP protein subunit POP1, putative OS=Plasmodium falciparum (isolate 3D7) OX=36329 GN=PF3D7_0709600 PE=4 SV=1	1	16	1156	0	29.997	3.73e-09	1194	0.00618974	3.73e-09	27.7631	9	1	1
PF3D7_0724700	C0H4P2	MAL7P1.134	tr|C0H4P2|C0H4P2_PLAF7 Uncharacterized protein OS=Plasmodium falciparum (isolate 3D7) OX=36329 GN=PF3D7_0724700 PE=4 SV=1	1	27	3489	0	39.567	3.75e-14	564	0.00292379	3.75e-14	26.5413	9	1	1
PF3D7_0823200	Q8IB66	MAL8P1.40	tr|Q8IB66|Q8IB66_PLAF7 RNA-binding protein, putative OS=Plasmodium falciparum (isolate 3D7) OX=36329 GN=PF3D7_0823200 PE=4 SV=1	1	7	286	0	53.888	4.32e-15	429	0.00222395	4.32e-15	3.20302	9	1	1
PF3D7_0507800	Q8I425	PFE0385w	tr|Q8I425|Q8I425_PLAF7 Uncharacterized protein OS=Plasmodium falciparum (isolate 3D7) OX=36329 GN=PF3D7_0507800 PE=4 SV=1	1	13	1527	0	59.142	6.09e-16	333	0.00172628	6.09e-16	27.6225	9	1	1
PF3D7_1010100	Q8IJU4	PF10_0098	tr|Q8IJU4|Q8IJU4_PLAF7 PI31 domain-containing protein, putative OS=Plasmodium falciparum (isolate 3D7) OX=36329 GN=PF3D7_1010100 PE=4 SV=1	1	6	298	0	130.33	8.19e-12	863	0.00447382	8.19e-12	28.3761	9	1	1
PF3D7_1238100	Q8I542	PFL1845c	tr|Q8I542|Q8I542_PLAF7 Calcyclin binding protein, putative OS=Plasmodium falciparum (isolate 3D7) OX=36329 GN=PF3D7_1238100 PE=4 SV=2	1	7	228	0	228.74	4.4e-09	1202	0.00623121	4.4e-09	4.99542	9	1	1
PF3D7_0610800	C6KSV3	PfTK	tr|C6KSV3|C6KSV3_PLAF7 Transketolase OS=Plasmodium falciparum (isolate 3D7) OX=36329 GN=PF3D7_0610800 PE=4 SV=1	1	17	672	0	64.203	1.68e-06	1332	0.00690513	1.68e-06	2.10373	9	1	1
PF3D7_1359300	Q8IDB6	MAL13P1.289	tr|Q8IDB6|Q8IDB6_PLAF7 Exosome complex exonuclease RRP44 OS=Plasmodium falciparum (isolate 3D7) OX=36329 GN=PF3D7_1359300 PE=3 SV=2	1	18	1073	0	95.293	6.28e-12	853	0.00442198	6.28e-12	27.4626	9	1	1
PF3D7_1234100	Q8I581	PFL1645w	tr|Q8I581|Q8I581_PLAF7 Bromodomain protein, putative OS=Plasmodium falciparum (isolate 3D7) OX=36329 GN=PF3D7_1234100 PE=4 SV=1	1	22	3896	0	24.876	8.98e-18	164	0.000850181	8.98e-18	27.1031	9	1	1
PF3D7_0823300	Q8IB67	gcn5	tr|Q8IB67|Q8IB67_PLAF7 Histone acetyltransferase GCN5 OS=Plasmodium falciparum (isolate 3D7) OX=36329 GN=PF3D7_0823300 PE=1 SV=2	1	14	1465	0	57.845	5.75e-15	439	0.00227579	5.75e-15	27.7122	9	1	1
PF3D7_1438000	Q8IL87	PF14_0360	tr|Q8IL87|Q8IL87_PLAF7 Eukaryotic translation initiation factor 2A OS=Plasmodium falciparum (isolate 3D7) OX=36329 GN=PF3D7_1438000 PE=3 SV=1	1	14	661	0	65.209	1.33e-14	501	0.0025972	1.33e-14	3.01972	9	1	1
PF3D7_1363400	A0A5K1K8W0		tr|A0A5K1K8W0|A0A5K1K8W0_PLAF7 Polyubiquitin binding protein, putative OS=Plasmodium falciparum (isolate 3D7) OX=36329 GN=PF3D7_1363400 PE=4 SV=1	1	17	905	0	100	4.31e-21	39	0.000202177	4.31e-21	27.4011	9	1	1
PF3D7_0704400	Q8IC26	PF07_0017	tr|Q8IC26|Q8IC26_PLAF7 Phosphoinositide-binding protein, putative OS=Plasmodium falciparum (isolate 3D7) OX=36329 GN=PF3D7_0704400 PE=4 SV=1	1	16	1010	0	231.94	4.11e-16	311	0.00161223	4.11e-16	27.5733	9	1	1
PF3D7_1421100	Q8ILN9	PF14_0204	tr|Q8ILN9|Q8ILN9_PLAF7 Uncharacterized protein OS=Plasmodium falciparum (isolate 3D7) OX=36329 GN=PF3D7_1421100 PE=4 SV=1	1	14	1253	0	57.174	3.29e-18	133	0.000689476	3.29e-18	27.5141	9	1	1
PF3D7_0804900	Q8IAP4	PF08_0120	tr|Q8IAP4|Q8IAP4_PLAF7 GTPase-activating protein, putative OS=Plasmodium falciparum (isolate 3D7) OX=36329 GN=PF3D7_0804900 PE=4 SV=1	1	6	491	0	129.54	4.51e-16	317	0.00164334	4.51e-16	28.7207	9	1	1
PF3D7_0511300	Q8I3Z3	PFE0560c	tr|Q8I3Z3|Q8I3Z3_PLAF7 MORN repeat protein, putative OS=Plasmodium falciparum (isolate 3D7) OX=36329 GN=PF3D7_0511300 PE=4 SV=2	1	9	1417	0	8.0189	1e-11	879	0.00455676	1e-11	29.6173	9	1	1
PF3D7_1458600	Q8IKP5	PF14_0559	tr|Q8IKP5|Q8IKP5_PLAF7 Zinc finger protein, putative OS=Plasmodium falciparum (isolate 3D7) OX=36329 GN=PF3D7_1458600 PE=4 SV=1	1	20	1163	0	60.257	6.13e-19	97	0.000502851	6.13e-19	27.4648	9	1	1
PF3D7_0711500	C0H4M6	MAL7P1.38	tr|C0H4M6|C0H4M6_PLAF7 Regulator of chromosome condensation, putative OS=Plasmodium falciparum (isolate 3D7) OX=36329 GN=PF3D7_0711500 PE=4 SV=2	1	10	688	0	81.631	1.18e-13	646	0.00334888	1.18e-13	3.71601	9	1	1
PF3D7_1118500	Q8III3	PF11_0191	tr|Q8III3|Q8III3_PLAF7 Nucleolar protein 56, putative OS=Plasmodium falciparum (isolate 3D7) OX=36329 GN=PF3D7_1118500 PE=4 SV=1	1	15	594	0	59.758	1.95e-15	386	0.00200104	1.95e-15	3.66016	9	1	1
PF3D7_1010200	Q8IJU3	PF10_0099	tr|Q8IJU3|Q8IJU3_PLAF7 DNA2/NAM7 helicase, putative OS=Plasmodium falciparum (isolate 3D7) OX=36329 GN=PF3D7_1010200 PE=4 SV=2	1	20	1839	0	150.26	5.01e-14	582	0.00301711	5.01e-14	26.9863	9	1	1
PF3D7_1417500	Q8ILS0	PF14_0174	tr|Q8ILS0|Q8ILS0_PLAF7 H/ACA ribonucleoprotein complex subunit 4, putative OS=Plasmodium falciparum (isolate 3D7) OX=36329 GN=PF3D7_1417500 PE=4 SV=1	1	10	466	0	50.313	5.92e-14	595	0.0030845	5.92e-14	4.51529	9	1	1
PF3D7_0528100	Q8I3I6	PFE1400c	tr|Q8I3I6|Q8I3I6_PLAF7 AP complex subunit beta OS=Plasmodium falciparum (isolate 3D7) OX=36329 GN=PF3D7_0528100 PE=3 SV=2	1	16	929	0	39.318	9.68e-18	166	0.00086055	9.68e-18	3.38922	9	1	1
PF3D7_1454700	Q8IKT2	PF14_0520	tr|Q8IKT2|Q8IKT2_PLAF7 6-phosphogluconate dehydrogenase, decarboxylating OS=Plasmodium falciparum (isolate 3D7) OX=36329 GN=PF3D7_1454700 PE=1 SV=1	1	13	468	0	61.344	0.000781375	1408	0.00729912	0.000781375	1.86124	9	1	1
PF3D7_0609000	C6KST7	PFF0445w	tr|C6KST7|C6KST7_PLAF7 Nucleoporin NUP637, putative OS=Plasmodium falciparum (isolate 3D7) OX=36329 GN=PF3D7_0609000 PE=4 SV=1	1	31	6077	0	36.885	1.05e-16	253	0.00131156	1.05e-16	27.0639	9	1	1
PF3D7_1459000	Q8IKP1	PF14_0563	tr|Q8IKP1|Q8IKP1_PLAF7 ATP-dependent RNA helicase DBP5 OS=Plasmodium falciparum (isolate 3D7) OX=36329 GN=PF3D7_1459000 PE=4 SV=1	1	16	741	0	49.027	2.25e-18	122	0.000632452	2.25e-18	3.73292	9	1	1
PF3D7_1412700	Q8ILW7	PF14_0126	tr|Q8ILW7|Q8ILW7_PLAF7 AAA family ATPase, putative OS=Plasmodium falciparum (isolate 3D7) OX=36329 GN=PF3D7_1412700 PE=4 SV=1	1	19	1219	0	30.571	1.03e-15	354	0.00183515	1.03e-15	27.1549	9	1	1
PF3D7_0621100	C6KT49	PFF1020c	tr|C6KT49|C6KT49_PLAF7 Uncharacterized protein OS=Plasmodium falciparum (isolate 3D7) OX=36329 GN=PF3D7_0621100 PE=4 SV=1	1	19	1354	0	115	2.28e-13	677	0.00350959	2.28e-13	2.53819	9	1	1
PF3D7_0526500	Q8I3K0	PFE1320w	tr|Q8I3K0|Q8I3K0_PLAF7 Suf domain-containing protein OS=Plasmodium falciparum (isolate 3D7) OX=36329 GN=PF3D7_0526500 PE=4 SV=1	1	24	1384	0	57.655	3.99e-18	140	0.000725765	3.99e-18	27.1812	9	1	1
PF3D7_0411900	Q9U0H1	PFD0590c	tr|Q9U0H1|Q9U0H1_PLAF7 DNA polymerase OS=Plasmodium falciparum (isolate 3D7) OX=36329 GN=PF3D7_0411900 PE=3 SV=2	1	17	1912	0	79.51	1.08e-15	356	0.00184552	1.08e-15	4.27668	9	1	1
PF3D7_1366500	Q8ID43	PF13_0349	tr|Q8ID43|Q8ID43_PLAF7 Nucleoside diphosphate kinase OS=Plasmodium falciparum (isolate 3D7) OX=36329 GN=PF3D7_1366500 PE=1 SV=1	1	10	149	0	40.974	4.25e-05	1380	0.00715397	4.25e-05	2.50611	9	1	1
PF3D7_0821700	Q8IB51	PF08_0039	tr|Q8IB51|Q8IB51_PLAF7 60S ribosomal protein L22, putative OS=Plasmodium falciparum (isolate 3D7) OX=36329 GN=PF3D7_0821700 PE=1 SV=1	1	3	139	0	30.93	1.67e-12	787	0.00407983	1.67e-12	4.39727	9	1	1
PF3D7_0706500	C0H4L6	MAL7P1.204	tr|C0H4L6|C0H4L6_PLAF7 Uncharacterized protein OS=Plasmodium falciparum (isolate 3D7) OX=36329 GN=PF3D7_0706500 PE=4 SV=1	1	14	1706	0	145.21	4.84e-17	225	0.00116641	4.84e-17	4.35877	9	1	1
PF3D7_0513600	Q8I0W8	PFE0675c	tr|Q8I0W8|Q8I0W8_PLAF7 Deoxyribodipyrimidine photo-lyase, putative OS=Plasmodium falciparum (isolate 3D7) OX=36329 GN=PF3D7_0513600 PE=4 SV=1	1	12	1113	0	22.312	5.51e-17	230	0.00119233	5.51e-17	4.31154	9	1	1
PF3D7_1238500	Q8I538	PFL1865w	tr|Q8I538|Q8I538_PLAF7 Uncharacterized protein OS=Plasmodium falciparum (isolate 3D7) OX=36329 GN=PF3D7_1238500 PE=4 SV=1	1	10	1812	0	31.33	1.85e-12	794	0.00411612	1.85e-12	29.173	9	1	1
PF3D7_0615800	C6KSZ9	PFF0765c	tr|C6KSZ9|C6KSZ9_PLAF7 Conserved oligomeric Golgi complex subunit 4, putative OS=Plasmodium falciparum (isolate 3D7) OX=36329 GN=PF3D7_0615800 PE=4 SV=1	1	15	1185	0	38.43	1.2e-14	492	0.00255054	1.2e-14	28.5854	9	1	1
PF3D7_1328100	Q8I6T3	PF13_0156	tr|Q8I6T3|Q8I6T3_PLAF7 Proteasome subunit beta OS=Plasmodium falciparum (isolate 3D7) OX=36329 GN=PF3D7_1328100 PE=1 SV=1	1	3	270	0	0.58084	2.11e-08	1247	0.00646449	2.11e-08	29.8544	9	1	1
PF3D7_0903900	Q8I3B0	PFI0190w	tr|Q8I3B0|Q8I3B0_PLAF7 60S ribosomal protein L32 OS=Plasmodium falciparum (isolate 3D7) OX=36329 GN=PF3D7_0903900 PE=1 SV=1	1	5	131	0	15.387	3.56e-07	1302	0.00674961	3.56e-07	1.60142	9	1	1
PF3D7_1407100	Q8IM23	PF14_0068	tr|Q8IM23|Q8IM23_PLAF7 rRNA 2-O-methyltransferase fibrillarin, putative OS=Plasmodium falciparum (isolate 3D7) OX=36329 GN=PF3D7_1407100 PE=3 SV=1	1	9	318	0	78.075	7.78e-15	461	0.00238984	7.78e-15	2.59985	9	1	1
PF3D7_0409600	Q9U0J0	PFD0470c	tr|Q9U0J0|Q9U0J0_PLAF7 Replication protein A1, large subunit OS=Plasmodium falciparum (isolate 3D7) OX=36329 GN=PF3D7_0409600 PE=4 SV=1	1	13	1145	0	23.702	1.37e-10	1023	0.00530327	1.37e-10	1.48019	9	1	1
PF3D7_0904500	Q8I3A4	PFI0220w	tr|Q8I3A4|Q8I3A4_PLAF7 Prefoldin subunit 4 OS=Plasmodium falciparum (isolate 3D7) OX=36329 GN=PF3D7_0904500 PE=3 SV=1	1	5	129	0	18.594	1.54e-08	1238	0.00641783	1.54e-08	29.3179	9	1	1
PF3D7_0106100	Q8I280	PFA_0300c	tr|Q8I280|Q8I280_PLAF7 V-type proton ATPase subunit C OS=Plasmodium falciparum (isolate 3D7) OX=36329 GN=PF3D7_0106100 PE=3 SV=1	1	12	383	0	31.318	1.6e-15	377	0.00195438	1.6e-15	3.53322	9	1	1
PF3D7_0807300	Q7K6B0	rab18	tr|Q7K6B0|Q7K6B0_PLAF7 Ras-related protein Rab-18 OS=Plasmodium falciparum (isolate 3D7) OX=36329 GN=PF3D7_0807300 PE=4 SV=1	1	4	201	0	54.28	2.66e-10	1063	0.00551063	2.66e-10	3.54831	9	1	1
PF3D7_1473200	Q8IKA6	PF14_0700	tr|Q8IKA6|Q8IKA6_PLAF7 DnaJ protein, putative OS=Plasmodium falciparum (isolate 3D7) OX=36329 GN=PF3D7_1473200 PE=4 SV=1	1	13	454	0	60.476	1.39e-10	1024	0.00530845	1.39e-10	2.31345	9	1	1
PF3D7_0611400	C6KSV9	PFF0560c	tr|C6KSV9|C6KSV9_PLAF7 SWIB/MDM2 domain-containing protein OS=Plasmodium falciparum (isolate 3D7) OX=36329 GN=PF3D7_0611400 PE=4 SV=1	1	11	830	0	45.125	1.81e-18	118	0.000611716	1.81e-18	27.4178	9	1	1
PF3D7_1120000	A0A143ZYR6;Q8IIG7	PF11_0207	tr|A0A143ZYR6|A0A143ZYR6_PLAF7 Uncharacterized protein OS=Plasmodium falciparum (isolate 3D7) OX=36329 GN=PF3D7_1120000 PE=4 SV=1;sp|Q8IIG7|YPF05_PLAF7 Uncharacterized protein PF11_0207 OS=Plasmodium falciparum (isolate 3D7) OX=36329 GN=PF11_0207 PE=1 SV=2	2	11	1070	0	80.235	6.95e-15	453	0.00234837	6.95e-15	3.04131	9	1	1
PF3D7_0910400	Q8I348	PFI0505c	tr|Q8I348|Q8I348_PLAF7 Selenide water dikinase, putative OS=Plasmodium falciparum (isolate 3D7) OX=36329 GN=PF3D7_0910400 PE=4 SV=1	1	22	1193	0	67.313	2.24e-13	675	0.00349922	2.24e-13	27.1396	9	1	1
PF3D7_1126500	Q8II99	PF11_0275	tr|Q8II99|Q8II99_PLAF7 WD repeat-containing protein, putative OS=Plasmodium falciparum (isolate 3D7) OX=36329 GN=PF3D7_1126500 PE=4 SV=1	1	19	1368	0	45.599	3.75e-13	710	0.00368066	3.75e-13	27.5254	9	1	1
PF3D7_1135100	Q8II13	PF11_0362	tr|Q8II13|Q8II13_PLAF7 Protein phosphatase PPM8, putative OS=Plasmodium falciparum (isolate 3D7) OX=36329 GN=PF3D7_1135100 PE=4 SV=1	1	13	689	0	72.246	1.84e-10	1043	0.00540695	1.84e-10	2.80712	9	1	1
PF3D7_1356100	Q8IDE1	PF13_0299	tr|Q8IDE1|Q8IDE1_PLAF7 Uncharacterized protein OS=Plasmodium falciparum (isolate 3D7) OX=36329 GN=PF3D7_1356100 PE=4 SV=1	1	13	964	0	141.64	1.06e-18	108	0.000559876	1.06e-18	3.92328	9	1	1
PF3D7_0721400	Q8IBN7	MAL7P1.114	tr|Q8IBN7|Q8IBN7_PLAF7 Rhoptry protein, putative OS=Plasmodium falciparum (isolate 3D7) OX=36329 GN=PF3D7_0721400 PE=4 SV=2	1	8	214	0	11.206	8.88e-12	871	0.00451529	8.88e-12	3.88662	9	1	1
PF3D7_1442100	C6S3I6	PF14_0783	tr|C6S3I6|C6S3I6_PLAF7 Replication factor A protein 3, putative OS=Plasmodium falciparum (isolate 3D7) OX=36329 GN=PF3D7_1442100 PE=4 SV=1	1	4	109	0	220.52	5.94e-08	1271	0.00658891	5.94e-08	5.25169	9	1	1
PF3D7_1316500	A0A5K1K8A8		tr|A0A5K1K8A8|A0A5K1K8A8_PLAF7 Pre-mRNA-processing factor 40, putative OS=Plasmodium falciparum (isolate 3D7) OX=36329 GN=PF3D7_1316500 PE=4 SV=1	1	10	906	0	30.981	4.99e-16	320	0.00165889	4.99e-16	27.7609	9	1	1
PF3D7_1453000	Q8IKU7	PF14_0504	tr|Q8IKU7|Q8IKU7_PLAF7 Uncharacterized protein OS=Plasmodium falciparum (isolate 3D7) OX=36329 GN=PF3D7_1453000 PE=4 SV=2	1	13	931	0	69.401	6.13e-14	599	0.00310524	6.13e-14	27.3924	9	1	1
PF3D7_1005600	C6S3C2	PF10_0057a	tr|C6S3C2|C6S3C2_PLAF7 DnaJ protein, putative OS=Plasmodium falciparum (isolate 3D7) OX=36329 GN=PF3D7_1005600 PE=4 SV=1	1	9	796	0	20.243	2.65e-16	294	0.00152411	2.65e-16	27.9106	9	1	1
PF3D7_1135400	Q8II11	PF11_0364	tr|Q8II11|Q8II11_PLAF7 Uncharacterized protein OS=Plasmodium falciparum (isolate 3D7) OX=36329 GN=PF3D7_1135400 PE=4 SV=1	1	9	245	0	26.947	4.98e-08	1267	0.00656817	4.98e-08	2.08227	9	1	1
PF3D7_1414500	A0A144A1E4		tr|A0A144A1E4|A0A144A1E4_PLAF7 Atypical protein kinase, ABC-1 family, putative OS=Plasmodium falciparum (isolate 3D7) OX=36329 GN=PF3D7_1414500 PE=4 SV=1	1	19	2758	0	95.964	7.39e-13	744	0.00385692	7.39e-13	27.4964	9	1	1
PF3D7_1309700	Q8IEL8	PF13_0053	tr|Q8IEL8|Q8IEL8_PLAF7 Vacuolar protein sorting-associated protein 18, putative OS=Plasmodium falciparum (isolate 3D7) OX=36329 GN=PF3D7_1309700 PE=4 SV=1	1	15	1672	0	44.753	2.16e-15	391	0.00202696	2.16e-15	27.1553	9	1	1
PF3D7_1202600	A0A144A0J9		tr|A0A144A0J9|A0A144A0J9_PLAF7 Uncharacterized protein OS=Plasmodium falciparum (isolate 3D7) OX=36329 GN=PF3D7_1202600 PE=4 SV=1	1	17	2180	0	124.38	3.5e-14	558	0.00289269	3.5e-14	27.3201	9	1	1
PF3D7_1439700	Q8IL72	PF14_0376	tr|Q8IL72|Q8IL72_PLAF7 Leucine carboxyl methyltransferase 1 OS=Plasmodium falciparum (isolate 3D7) OX=36329 GN=PF3D7_1439700 PE=3 SV=2	1	5	327	0	12.095	3.28e-16	302	0.00156558	3.28e-16	5.75027	9	1	1
PF3D7_0626200	C6KT98	PFF1270c	tr|C6KT98|C6KT98_PLAF7 Uncharacterized protein OS=Plasmodium falciparum (isolate 3D7) OX=36329 GN=PF3D7_0626200 PE=4 SV=1	1	6	418	0	48.297	5.06e-08	1268	0.00657335	5.06e-08	28.5585	9	1	1
PF3D7_1134700	Q8II17	PF11_0358	tr|Q8II17|Q8II17_PLAF7 DNA-directed RNA polymerase subunit beta OS=Plasmodium falciparum (isolate 3D7) OX=36329 GN=PF3D7_1134700 PE=3 SV=1	1	20	1517	0	16.806	3.61e-15	422	0.00218766	3.61e-15	26.944	9	1	1
PF3D7_0717400	Q8IBS6	PF07_0071	tr|Q8IBS6|Q8IBS6_PLAF7 Queuine tRNA-ribosyltransferase, putative OS=Plasmodium falciparum (isolate 3D7) OX=36329 GN=PF3D7_0717400 PE=4 SV=1	1	13	751	0	62.362	6.78e-13	738	0.00382582	6.78e-13	27.2071	9	1	1
PF3D7_1469800	Q8IKD9	PF14_0666	tr|Q8IKD9|Q8IKD9_PLAF7 Uncharacterized protein OS=Plasmodium falciparum (isolate 3D7) OX=36329 GN=PF3D7_1469800 PE=4 SV=2	1	7	215	0	44.174	3.08e-07	1299	0.00673406	3.08e-07	28.4573	9	1	1
PF3D7_1223500	A0A144A125		tr|A0A144A125|A0A144A125_PLAF7 Uncharacterized protein OS=Plasmodium falciparum (isolate 3D7) OX=36329 GN=PF3D7_1223500 PE=4 SV=1	1	23	4505	0	23.519	2.26e-15	395	0.00204769	2.26e-15	26.764	9	1	1
PF3D7_1144500	Q8IHS2	Aos1	tr|Q8IHS2|Q8IHS2_PLAF7 SUMO-activating enzyme subunit 1 OS=Plasmodium falciparum (isolate 3D7) OX=36329 GN=PF3D7_1144500 PE=4 SV=1	1	7	338	0	26.644	7.42e-11	992	0.00514256	7.42e-11	27.6187	9	1	1
PF3D7_1304900	Q8IER7	PF13_0023	sp|Q8IER7|RPB11_PLAF7 Probable DNA-directed RNA polymerase II subunit RPB11 OS=Plasmodium falciparum (isolate 3D7) OX=36329 GN=PF13_0023 PE=3 SV=1	1	5	126	0	86.153	1.14e-07	1282	0.00664593	1.14e-07	28.9151	9	1	1
PF3D7_0405100	C0H489	PFD0250c	tr|C0H489|C0H489_PLAF7 Protein transport protein Sec24B, putative OS=Plasmodium falciparum (isolate 3D7) OX=36329 GN=PF3D7_0405100 PE=4 SV=1	1	12	1350	0	42.668	1.2e-12	770	0.00399171	1.2e-12	27.4531	9	1	1
PF3D7_1437400	Q8IL92	PF14_0354	tr|Q8IL92|Q8IL92_PLAF7 Pantothenate kinase 2, putative OS=Plasmodium falciparum (isolate 3D7) OX=36329 GN=PF3D7_1437400 PE=4 SV=1	1	10	766	0	39.264	2.68e-14	547	0.00283567	2.68e-14	27.6055	9	1	1
PF3D7_0209200	O96177	PFB0415c	tr|O96177|O96177_PLAF7 Exosome complex component MTR3, putative OS=Plasmodium falciparum (isolate 3D7) OX=36329 GN=PF3D7_0209200 PE=4 SV=3	1	7	275	0	72.939	5.76e-10	1102	0.0057128	5.76e-10	28.2442	9	1	1
PF3D7_1416500	Q8ILT0;Q8ILF7	PF14_0164	tr|Q8ILT0|Q8ILT0_PLAF7 Glutamate dehydrogenase OS=Plasmodium falciparum (isolate 3D7) OX=36329 GN=PF3D7_1416500 PE=3 SV=1	2	18	470	0	196.09	0.00466669	1424	0.00738206	0.00466669	1.53834	9	1	1
PF3D7_0415000	Q8I1T8	PFD0725c	sp|Q8I1T8|ASNA_PLAF7 ATPase ASNA1 homolog OS=Plasmodium falciparum (isolate 3D7) OX=36329 GN=PFD0725c PE=3 SV=1	1	8	379	0	64.998	1.21e-14	494	0.00256091	1.21e-14	5.10791	9	1	1
PF3D7_0305600	O97240	PFC0250c	tr|O97240|O97240_PLAF7 DNA-(apurinic or apyrimidinic site) lyase OS=Plasmodium falciparum (isolate 3D7) OX=36329 GN=PF3D7_0305600 PE=3 SV=2	1	10	617	0	68.762	6e-14	596	0.00308968	6e-14	4.07397	9	1	1
PF3D7_0719300	Q8IBQ9	PF07_0077	tr|Q8IBQ9|Q8IBQ9_PLAF7 Actin-related protein, putative OS=Plasmodium falciparum (isolate 3D7) OX=36329 GN=PF3D7_0719300 PE=3 SV=1	1	15	1032	0	26.197	8.6e-14	625	0.00324002	8.6e-14	27.1877	9	1	1
PF3D7_0317200	O77385	Pfcrk-4	tr|O77385|O77385_PLAF7 Cdc2-related protein kinase 4 OS=Plasmodium falciparum (isolate 3D7) OX=36329 GN=PF3D7_0317200 PE=4 SV=1	1	12	1553	0	11.834	3.7e-13	709	0.00367548	3.7e-13	27.3405	9	1	1
PF3D7_1445900	Q8IL13	PF14_0437	tr|Q8IL13|Q8IL13_PLAF7 ATP-dependent RNA helicase DDX5, putative OS=Plasmodium falciparum (isolate 3D7) OX=36329 GN=PF3D7_1445900 PE=2 SV=2	1	11	527	0	60.014	2.17e-14	534	0.00276827	2.17e-14	2.22231	9	1	1
PF3D7_1419800.2	A0A144A3W0;A0A144A323;O15770	GR3	tr|A0A144A3W0|A0A144A3W0_PLAF7 Glutathione reductase OS=Plasmodium falciparum (isolate 3D7) OX=36329 GN=PF3D7_1419800.2 PE=3 SV=1;tr|A0A144A323|A0A144A323_PLAF7 Glutathione reductase OS=Plasmodium falciparum (isolate 3D7) OX=36329 GN=PF3D7_1419800.1 PE=3 S	3	17	546	0	83.511	3.8e-08	1262	0.00654225	3.8e-08	2.32996	9	1	1
PF3D7_0913600	Q8I316	PFI0665w	tr|Q8I316|Q8I316_PLAF7 Uncharacterized protein OS=Plasmodium falciparum (isolate 3D7) OX=36329 GN=PF3D7_0913600 PE=4 SV=1	1	14	1231	0	41.962	1.64e-10	1036	0.00537066	1.64e-10	28.5772	9	1	1
PF3D7_1033700	Q8IJ72	PF10_0328	tr|Q8IJ72|Q8IJ72_PLAF7 Bromodomain protein 1 OS=Plasmodium falciparum (isolate 3D7) OX=36329 GN=PF3D7_1033700 PE=1 SV=1	1	9	488	0	82.247	2.55e-11	934	0.00484189	2.55e-11	28.1044	9	1	1
PF3D7_0210600	O96188	PFB0475c	tr|O96188|O96188_PLAF7 Uncharacterized protein OS=Plasmodium falciparum (isolate 3D7) OX=36329 GN=PF3D7_0210600 PE=4 SV=2	1	6	446	0	12.111	4.74e-17	223	0.00115604	4.74e-17	27.9071	9	1	1
PF3D7_1236300	Q8I560	PFL1755w	tr|Q8I560|Q8I560_PLAF7 Uncharacterized protein OS=Plasmodium falciparum (isolate 3D7) OX=36329 GN=PF3D7_1236300 PE=4 SV=1	1	8	425	0	192.66	1.11e-08	1231	0.00638154	1.11e-08	27.8693	9	1	1
PF3D7_0933200	C0H586	PFI1610c	tr|C0H586|C0H586_PLAF7 Calcyclin-binding protein, putative OS=Plasmodium falciparum (isolate 3D7) OX=36329 GN=PF3D7_0933200 PE=4 SV=2	1	6	200	0	9.1928	2.19e-11	920	0.00476931	2.19e-11	3.72352	9	1	1
PF3D7_1121700	Q8IIE9	PF11_0225	tr|Q8IIE9|Q8IIE9_PLAF7 Protein GCN20 OS=Plasmodium falciparum (isolate 3D7) OX=36329 GN=PF3D7_1121700 PE=4 SV=1	1	12	815	0	20.582	3.91e-16	309	0.00160187	3.91e-16	27.2855	9	1	1
PF3D7_1409800	Q8ILZ7	PF14_0096	tr|Q8ILZ7|Q8ILZ7_PLAF7 CUGBP Elav-like family member 2, putative OS=Plasmodium falciparum (isolate 3D7) OX=36329 GN=PF3D7_1409800 PE=4 SV=1	1	9	514	0	44.341	2.74e-15	407	0.0021099	2.74e-15	2.63192	9	1	1
PF3D7_1419200	Q8ILQ8	PF14_0186	tr|Q8ILQ8|Q8ILQ8_PLAF7 Thioredoxin-like protein, putative OS=Plasmodium falciparum (isolate 3D7) OX=36329 GN=PF3D7_1419200 PE=4 SV=2	1	11	671	0	27.892	1.01e-15	353	0.00182996	1.01e-15	3.92723	9	1	1
PF3D7_0630300	C6KTD8	PFF1470c	tr|C6KTD8|C6KTD8_PLAF7 DNA polymerase epsilon catalytic subunit A, putative OS=Plasmodium falciparum (isolate 3D7) OX=36329 GN=PF3D7_0630300 PE=4 SV=1	1	24	2907	0	47.221	1.03e-18	107	0.000554692	1.03e-18	26.586	9	1	1
PF3D7_0606600	C6KSR4	PFF0325c	tr|C6KSR4|C6KSR4_PLAF7 Uncharacterized protein OS=Plasmodium falciparum (isolate 3D7) OX=36329 GN=PF3D7_0606600 PE=4 SV=1	1	16	2414	0	63.72	4.39e-10	1089	0.00564541	4.39e-10	27.8125	9	1	1
PF3D7_0308200	O77323		sp|O77323|TCPH_PLAF7 T-complex protein 1 subunit eta OS=Plasmodium falciparum (isolate 3D7) OX=36329 GN=MAL3P3.6 PE=3 SV=1	1	18	539	0	145	1.46e-08	1236	0.00640747	1.46e-08	2.20925	9	1	1
PF3D7_1005500	A0A143ZY29		tr|A0A143ZY29|A0A143ZY29_PLAF7 Regulator of nonsense transcripts 1, putative OS=Plasmodium falciparum (isolate 3D7) OX=36329 GN=PF3D7_1005500 PE=4 SV=1	1	18	1579	0	162.8	5.13e-12	842	0.00436496	5.13e-12	27.3104	9	1	1
PF3D7_1106700	Q8IIT6	PF11_0078	tr|Q8IIT6|Q8IIT6_PLAF7 DNA replication ATP-dependent helicase/nuclease DNA2, putative OS=Plasmodium falciparum (isolate 3D7) OX=36329 GN=PF3D7_1106700 PE=4 SV=1	1	14	1024	0	16.934	3.45e-13	704	0.00364956	3.45e-13	27.1798	9	1	1
PF3D7_0501900	Q8I481	PFE0095c	tr|Q8I481|Q8I481_PLAF7 Uncharacterized protein OS=Plasmodium falciparum (isolate 3D7) OX=36329 GN=PF3D7_0501900 PE=4 SV=1	1	9	381	0	126.83	2.84e-09	1180	0.00611716	2.84e-09	27.7563	9	1	1
PF3D7_1439800	Q8IL71	PF14_0377	tr|Q8IL71|Q8IL71_PLAF7 Vesicle-associated membrane protein, putative OS=Plasmodium falciparum (isolate 3D7) OX=36329 GN=PF3D7_1439800 PE=4 SV=1	1	7	241	0	135.4	4.46e-17	222	0.00115086	4.46e-17	3.91323	9	1	1
PF3D7_0716800	Q8IBT2	MAL7P1.81	tr|Q8IBT2|Q8IBT2_PLAF7 Eukaryotic translation initiation factor 3 subunit I OS=Plasmodium falciparum (isolate 3D7) OX=36329 GN=PF3D7_0716800 PE=3 SV=1	1	11	327	0	22.696	1.08e-09	1140	0.0059098	1.08e-09	2.41835	9	1	1
PF3D7_0604300	C6KSP1	PFF0210w	tr|C6KSP1|C6KSP1_PLAF7 Uncharacterized protein OS=Plasmodium falciparum (isolate 3D7) OX=36329 GN=PF3D7_0604300 PE=4 SV=1	1	8	773	0	19.937	1.34e-17	179	0.000927942	1.34e-17	27.5178	9	1	1
PF3D7_1457500	Q8IKQ5	PF14_0548	tr|Q8IKQ5|Q8IKQ5_PLAF7 Vacuolar protein sorting-associated protein 4 OS=Plasmodium falciparum (isolate 3D7) OX=36329 GN=PF3D7_1457500 PE=3 SV=1	1	11	419	0	114.01	1.37e-11	898	0.00465526	1.37e-11	27.6766	9	1	1
PF3D7_0218000	O96260	PFB0840w	tr|O96260|O96260_PLAF7 Replication factor C subunit 2, putative OS=Plasmodium falciparum (isolate 3D7) OX=36329 GN=PF3D7_0218000 PE=4 SV=1	1	11	330	0	121.89	2.76e-18	128	0.000663556	2.76e-18	3.04685	9	1	1
PF3D7_0219600	O96271	PFB0895c	tr|O96271|O96271_PLAF7 Replication factor C subunit 1 OS=Plasmodium falciparum (isolate 3D7) OX=36329 GN=PF3D7_0219600 PE=3 SV=1	1	13	904	0	27.657	2.24e-15	394	0.00204251	2.24e-15	3.54699	9	1	1
PF3D7_0720200	Q8IBQ0	PF07_0084	tr|Q8IBQ0|Q8IBQ0_PLAF7 Uncharacterized protein OS=Plasmodium falciparum (isolate 3D7) OX=36329 GN=PF3D7_0720200 PE=4 SV=1	1	6	121	0	23.373	3.02e-08	1258	0.00652151	3.02e-08	28.6774	9	1	1
PF3D7_0302000	O97334	PFC0100c	tr|O97334|O97334_PLAF7 Pre-mRNA-splicing factor PRP46, putative OS=Plasmodium falciparum (isolate 3D7) OX=36329 GN=PF3D7_0302000 PE=4 SV=2	1	11	600	0	78.606	1.22e-15	365	0.00189217	1.22e-15	26.9694	9	1	1
PF3D7_0604100	C6KSN9	ApiAP2	tr|C6KSN9|C6KSN9_PLAF7 AP2 domain transcription factor OS=Plasmodium falciparum (isolate 3D7) OX=36329 GN=PF3D7_0604100 PE=4 SV=1	1	16	1979	0	118.97	7.6e-10	1125	0.00583204	7.6e-10	27.1111	9	1	1
PF3D7_0909800	C0H529	PFI0475w	tr|C0H529|C0H529_PLAF7 Small nuclear ribonucleoprotein Sm D3 OS=Plasmodium falciparum (isolate 3D7) OX=36329 GN=PF3D7_0909800 PE=3 SV=1	1	5	116	0	41.501	8.6e-07	1321	0.00684811	8.6e-07	29.1024	9	1	1
PF3D7_1366900	Q8ID39	MAL13P1.336	sp|Q8ID39|Y13P2_PLAF7 Uncharacterized protein MAL13P1.336 OS=Plasmodium falciparum (isolate 3D7) OX=36329 GN=MAL13P1.336 PE=1 SV=1	1	7	685	0	72.208	3.89e-10	1083	0.00561431	3.89e-10	28.5582	9	1	1
PF3D7_0416900	C0H4A9	PFD0815c:exon:2	tr|C0H4A9|C0H4A9_PLAF7 Uncharacterized protein OS=Plasmodium falciparum (isolate 3D7) OX=36329 GN=PF3D7_0416900 PE=4 SV=1	1	18	2422	0	44.071	2.37e-18	123	0.000637636	2.37e-18	26.77	9	1	1
PF3D7_1036900	A0A143ZYL5		tr|A0A143ZYL5|A0A143ZYL5_PLAF7 Uncharacterized protein OS=Plasmodium falciparum (isolate 3D7) OX=36329 GN=PF3D7_1036900 PE=4 SV=1	1	10	1681	0	66.223	3.69e-11	948	0.00491446	3.69e-11	28.2998	9	1	1
PF3D7_1225200	Q8I5G5	PFL1215c	tr|Q8I5G5|Q8I5G5_PLAF7 Uncharacterized protein OS=Plasmodium falciparum (isolate 3D7) OX=36329 GN=PF3D7_1225200 PE=4 SV=1	1	11	1187	0	53.231	1.41e-20	48	0.000248834	1.41e-20	27.2797	9	1	1
PF3D7_0213500	O96215	PFB0610c	tr|O96215|O96215_PLAF7 Tetratricopeptide repeat protein, putative OS=Plasmodium falciparum (isolate 3D7) OX=36329 GN=PF3D7_0213500 PE=4 SV=2	1	6	460	0	20.489	4.17e-12	833	0.0043183	4.17e-12	27.8238	9	1	1
PF3D7_1107500	Q8IIS7	PF11_0088	tr|Q8IIS7|Q8IIS7_PLAF7 Prefoldin, putative OS=Plasmodium falciparum (isolate 3D7) OX=36329 GN=PF3D7_1107500 PE=4 SV=2	1	4	155	0	40.555	6.92e-07	1318	0.00683256	6.92e-07	28.3962	9	1	1
PF3D7_1363600	A0A5K1K954		tr|A0A5K1K954|A0A5K1K954_PLAF7 Uncharacterized protein OS=Plasmodium falciparum (isolate 3D7) OX=36329 GN=PF3D7_1363600 PE=4 SV=1	1	6	227	0	44.606	3.12e-07	1300	0.00673924	3.12e-07	28.3991	9	1	1
PF3D7_0408100	Q9U0K5	PFD0400w	tr|Q9U0K5|Q9U0K5_PLAF7 Uncharacterized protein OS=Plasmodium falciparum (isolate 3D7) OX=36329 GN=PF3D7_0408100 PE=4 SV=2	1	6	1121	0	104.28	8.6e-18	161	0.000834629	8.6e-18	27.9841	9	1	1
PF3D7_0321600	O97290	PFC0955w	tr|O97290|O97290_PLAF7 ATP-dependent RNA helicase DDX42, putative OS=Plasmodium falciparum (isolate 3D7) OX=36329 GN=PF3D7_0321600 PE=4 SV=2	1	13	735	0	159.32	3.04e-17	208	0.00107828	3.04e-17	27.4436	9	1	1
PF3D7_0820000	C0H4W3	PF08_0048	sp|C0H4W3|HEPF1_PLAF7 Probable ATP-dependent helicase PF08_0048 OS=Plasmodium falciparum (isolate 3D7) OX=36329 GN=PF08_0048 PE=1 SV=1	1	13	2082	0	81.802	5.03e-17	228	0.00118196	5.03e-17	27.2353	9	1	1
PF3D7_1130700	Q8II57	PF11_0317	tr|Q8II57|Q8II57_PLAF7 Structural maintenance of chromosomes protein 1, putative OS=Plasmodium falciparum (isolate 3D7) OX=36329 GN=PF3D7_1130700 PE=4 SV=1	1	17	1818	0	51.867	3.57e-14	560	0.00290306	3.57e-14	26.9887	9	1	1
PF3D7_0931000	Q8I2K5	PFI1505c	tr|Q8I2K5|Q8I2K5_PLAF7 Elongation factor Tu, putative OS=Plasmodium falciparum (isolate 3D7) OX=36329 GN=PF3D7_0931000 PE=4 SV=1	1	13	911	0	22.849	1.86e-17	187	0.000969414	1.86e-17	27.0242	9	1	1
PF3D7_0730300	Q8IBF6	ApiAP2	tr|Q8IBF6|Q8IBF6_PLAF7 AP2 domain transcription factor AP2-L, putative OS=Plasmodium falciparum (isolate 3D7) OX=36329 GN=PF3D7_0730300 PE=4 SV=1	1	9	1331	0	52.176	6.4e-16	336	0.00174183	6.4e-16	27.6788	9	1	1
PF3D7_1118200	Q8III6	PF11_0188	tr|Q8III6|Q8III6_PLAF7 Heat shock protein 90, putative OS=Plasmodium falciparum (isolate 3D7) OX=36329 GN=PF3D7_1118200 PE=3 SV=1	1	13	930	0	149.38	1.28e-13	651	0.00337481	1.28e-13	2.52787	9	1	1
PF3D7_1359600	A0A5K1K8U0		tr|A0A5K1K8U0|A0A5K1K8U0_PLAF7 Uncharacterized protein OS=Plasmodium falciparum (isolate 3D7) OX=36329 GN=PF3D7_1359600 PE=4 SV=1	1	17	2025	0	116.26	5.19e-16	323	0.00167444	5.19e-16	26.9386	9	1	1
PF3D7_1465200	Q8IKI6	PF14_0619	tr|Q8IKI6|Q8IKI6_PLAF7 Mediator of RNA polymerase II transcription subunit 4, putative OS=Plasmodium falciparum (isolate 3D7) OX=36329 GN=PF3D7_1465200 PE=4 SV=1	1	7	376	0	66.013	2.7e-09	1177	0.00610161	2.7e-09	27.8783	9	1	1
PF3D7_0411100	Q9U0H7	PFD0550c	tr|Q9U0H7|Q9U0H7_PLAF7 Mediator of RNA polymerase II transcription subunit 8, putative OS=Plasmodium falciparum (isolate 3D7) OX=36329 GN=PF3D7_0411100 PE=4 SV=1	1	7	205	0	323.31	5.32e-09	1209	0.0062675	5.32e-09	28.4242	9	1	1
PF3D7_1203900	Q8I607	PFL0190w	tr|Q8I607|Q8I607_PLAF7 Ubiquitin-conjugating enzyme E2 OS=Plasmodium falciparum (isolate 3D7) OX=36329 GN=PF3D7_1203900 PE=3 SV=1	1	3	147	0	6.9167	1.13e-17	174	0.000902022	1.13e-17	28.8278	9	1	1
PF3D7_0906500	Q8I384	PFI0320w	tr|Q8I384|Q8I384_PLAF7 Arginase OS=Plasmodium falciparum (isolate 3D7) OX=36329 GN=PF3D7_0906500 PE=1 SV=1	1	11	411	0	33.602	5.52e-14	591	0.00306376	5.52e-14	3.64476	9	1	1
PF3D7_1359400	Q8IDB7	PF13_0315	tr|Q8IDB7|Q8IDB7_PLAF7 CUGBP Elav-like family member 1 OS=Plasmodium falciparum (isolate 3D7) OX=36329 GN=PF3D7_1359400 PE=4 SV=1	1	7	509	0	28.287	2.29e-08	1250	0.00648004	2.29e-08	2.51111	9	1	1
PF3D7_0815600	Q8IAZ3	MAL8P1.83	tr|Q8IAZ3|Q8IAZ3_PLAF7 Eukaryotic translation initiation factor 3 subunit G OS=Plasmodium falciparum (isolate 3D7) OX=36329 GN=PF3D7_0815600 PE=3 SV=2	1	8	268	0	167.24	1.66e-10	1037	0.00537584	1.66e-10	3.04698	9	1	1
PF3D7_1320600	Q76NM4	Rab11a	tr|Q76NM4|Q76NM4_PLAF7 Ras-related protein Rab-11A OS=Plasmodium falciparum (isolate 3D7) OX=36329 GN=PF3D7_1320600 PE=1 SV=1	1	7	216	0	14.2	3.25e-10	1069	0.00554173	3.25e-10	2.82583	9	1	1
PF3D7_1406200	Q8IM32	PF14_0059	tr|Q8IM32|Q8IM32_PLAF7 Transcription elongation factor SPT6, putative OS=Plasmodium falciparum (isolate 3D7) OX=36329 GN=PF3D7_1406200 PE=4 SV=1	1	18	2820	0	25.405	1.12e-15	357	0.0018507	1.12e-15	26.8417	9	1	1
PF3D7_0110700	Q8I238	PFA_0520c	tr|Q8I238|Q8I238_PLAF7 Chromatin assembly factor 1 protein WD40 domain, putative OS=Plasmodium falciparum (isolate 3D7) OX=36329 GN=PF3D7_0110700 PE=4 SV=1	1	9	446	0	77.573	2.42e-06	1336	0.00692587	2.42e-06	2.2488	9	1	1
PF3D7_0913300	Q8I319	PFI0650c	tr|Q8I319|Q8I319_PLAF7 Uncharacterized protein OS=Plasmodium falciparum (isolate 3D7) OX=36329 GN=PF3D7_0913300 PE=4 SV=1	1	11	646	0	19.932	3.51e-16	305	0.00158113	3.51e-16	27.3808	9	1	1
PF3D7_1218500	Q8I5M3	PFL0895c	tr|Q8I5M3|Q8I5M3_PLAF7 Dynamin-like protein, putative OS=Plasmodium falciparum (isolate 3D7) OX=36329 GN=PF3D7_1218500 PE=4 SV=1	1	18	1061	0	76.755	1.2e-16	263	0.0013634	1.2e-16	27.1327	9	1	1
PF3D7_0422300	Q8IFP3	PFD1050w	tr|Q8IFP3|Q8IFP3_PLAF7 Tubulin alpha chain OS=Plasmodium falciparum (isolate 3D7) OX=36329 GN=PF3D7_0422300 PE=3 SV=1	1	17	450	0	38.319	7.78e-06	1353	0.007014	7.78e-06	1.3879	9	1	1
PF3D7_1237000	Q8I553	PFL1790w	tr|Q8I553|Q8I553_PLAF7 SUMO-activating enzyme subunit OS=Plasmodium falciparum (isolate 3D7) OX=36329 GN=PF3D7_1237000 PE=3 SV=1	1	9	686	0	115.71	2.13e-12	802	0.0041576	2.13e-12	4.69607	9	1	1
PF3D7_1434100	A0A144A3R0;Q8ILC2	PF14_0322	tr|A0A144A3R0|A0A144A3R0_PLAF7 Queuine tRNA-ribosyltransferase, putative OS=Plasmodium falciparum (isolate 3D7) OX=36329 GN=PF3D7_1434100 PE=4 SV=1;sp|Q8ILC2|TGTL_PLAF7 Queuine tRNA-ribosyltransferase-like protein OS=Plasmodium falciparum (isolate 3D7) OX=	2	10	407	0	133.89	6.35e-14	601	0.0031156	6.35e-14	4.4402	9	1	1
PF3D7_1312900	C0H5B1	MAL13P1.63	tr|C0H5B1|C0H5B1_PLAF7 Eukaryotic translation initation factor 4 gamma OS=Plasmodium falciparum (isolate 3D7) OX=36329 GN=PF3D7_1312900 PE=4 SV=1	1	11	1255	0	60.408	7.51e-10	1123	0.00582167	7.51e-10	2.84448	9	1	1
PF3D7_0528000	A0A5K1K941		tr|A0A5K1K941|A0A5K1K941_PLAF7 Proteasome maturation factor UMP1, putative OS=Plasmodium falciparum (isolate 3D7) OX=36329 GN=PF3D7_0528000 PE=4 SV=1	1	5	124	0	15.959	8.68e-11	1002	0.0051944	8.68e-11	27.7918	9	1	1
PF3D7_0620500	C6KT45	PFF1000w	tr|C6KT45|C6KT45_PLAF7 Cleavage stimulation factor subunit 1, putative OS=Plasmodium falciparum (isolate 3D7) OX=36329 GN=PF3D7_0620500 PE=4 SV=1	1	11	650	0	35.211	1.68e-11	907	0.00470192	1.68e-11	27.5064	9	1	1
PF3D7_1123100	Q8IID2	PF11_0242	tr|Q8IID2|Q8IID2_PLAF7 Calcium-dependent protein kinase 7 OS=Plasmodium falciparum (isolate 3D7) OX=36329 GN=PF3D7_1123100 PE=4 SV=1	1	13	2265	0	40.679	1.81e-13	662	0.00343183	1.81e-13	28.1734	9	1	1
PF3D7_0929200	C0H570	PFI1435w	tr|C0H570|C0H570_PLAF7 RNA-binding protein, putative OS=Plasmodium falciparum (isolate 3D7) OX=36329 GN=PF3D7_0929200 PE=4 SV=1	1	8	289	0	29.913	3.24e-12	823	0.00426646	3.24e-12	3.71821	9	1	1
PF3D7_1366600	Q8ID42	PF13_0350	tr|Q8ID42|Q8ID42_PLAF7 Signal recognition particle receptor subunit alpha, putative OS=Plasmodium falciparum (isolate 3D7) OX=36329 GN=PF3D7_1366600 PE=4 SV=1	1	11	576	0	37.114	8.81e-14	626	0.00324521	8.81e-14	27.5859	9	1	1
PF3D7_1226600	Q7KQJ9	PFL1285c	tr|Q7KQJ9|Q7KQJ9_PLAF7 Proliferating cell nuclear antigen OS=Plasmodium falciparum (isolate 3D7) OX=36329 GN=PF3D7_1226600 PE=3 SV=1	1	9	264	0	21.469	3.33e-10	1070	0.00554692	3.33e-10	2.6416	9	1	1
PF3D7_1128200	Q8II81	PF11_0293	tr|Q8II81|Q8II81_PLAF7 Multiprotein-bridging factor 1, putative OS=Plasmodium falciparum (isolate 3D7) OX=36329 GN=PF3D7_1128200 PE=4 SV=1	1	7	136	0	1.2232	4.96e-11	966	0.00500778	4.96e-11	3.62979	9	1	1
PF3D7_0822100	Q8IB55	PF08_0037	tr|Q8IB55|Q8IB55_PLAF7 Mediator of RNA polymerase II transcription subunit 7 OS=Plasmodium falciparum (isolate 3D7) OX=36329 GN=PF3D7_0822100 PE=3 SV=1	1	6	234	0	126.07	2.54e-08	1254	0.00650078	2.54e-08	27.9411	9	1	1
PF3D7_0311300	O77353	PFC0475c	tr|O77353|O77353_PLAF7 Phosphatidylinositol 3- and 4-kinase, putative OS=Plasmodium falciparum (isolate 3D7) OX=36329 GN=PF3D7_0311300 PE=4 SV=2	1	12	953	0	38.72	7.64e-13	748	0.00387766	7.64e-13	27.1198	9	1	1
PF3D7_0629700	C6KTD2	SET1	sp|C6KTD2|SET1_PLAF7 Putative histone-lysine N-methyltransferase 1 OS=Plasmodium falciparum (isolate 3D7) OX=36329 GN=SET1 PE=1 SV=1	1	19	6753	0	43.429	2.52e-11	933	0.0048367	2.52e-11	26.5951	9	1	1
PF3D7_0603400	Q6LFN2	PFF0165c	sp|Q6LFN2|ZNRF1_PLAF7 RING finger protein PFF0165c OS=Plasmodium falciparum (isolate 3D7) OX=36329 GN=PFF0165c PE=1 SV=1	1	14	1103	0	63.111	2.99e-17	206	0.00106791	2.99e-17	26.643	9	1	1
PF3D7_1429500	Q8ILG9	PF14_0274	tr|Q8ILG9|Q8ILG9_PLAF7 Diphthamide biosynthesis protein 2, putative OS=Plasmodium falciparum (isolate 3D7) OX=36329 GN=PF3D7_1429500 PE=3 SV=1	1	11	744	0	65.767	8e-12	861	0.00446345	8e-12	27.2418	9	1	1
PF3D7_1142100	Q8IHU4	PF11_0433	tr|Q8IHU4|Q8IHU4_PLAF7 J domain-containing protein OS=Plasmodium falciparum (isolate 3D7) OX=36329 GN=PF3D7_1142100 PE=4 SV=1	1	11	2738	0	107.73	1.14e-10	1014	0.00525661	1.14e-10	27.9605	9	1	1
PF3D7_1357700	A0A5K1K903		tr|A0A5K1K903|A0A5K1K903_PLAF7 U3 small nucleolar RNA-associated protein 21, putative OS=Plasmodium falciparum (isolate 3D7) OX=36329 GN=PF3D7_1357700 PE=4 SV=1	1	11	1218	0	56.405	2.65e-17	203	0.00105236	2.65e-17	27.2239	9	1	1
PF3D7_0614400	C6KSY5	PFF0695w	tr|C6KSY5|C6KSY5_PLAF7 Pre-mRNA-splicing factor CWF7, putative OS=Plasmodium falciparum (isolate 3D7) OX=36329 GN=PF3D7_0614400 PE=4 SV=1	1	9	255	0	120.39	1.69e-11	908	0.0047071	1.69e-11	27.7332	9	1	1
PF3D7_1446600	Q8IL07	CEN2	tr|Q8IL07|Q8IL07_PLAF7 Centrin-2 OS=Plasmodium falciparum (isolate 3D7) OX=36329 GN=PF3D7_1446600 PE=4 SV=1	1	7	168	0	48.195	1.42e-14	504	0.00261275	1.42e-14	2.95725	9	1	1
PF3D7_0819900	C0H4W2	PF08_0049	tr|C0H4W2|C0H4W2_PLAF7 U6 snRNA-associated Sm-like protein LSm3 OS=Plasmodium falciparum (isolate 3D7) OX=36329 GN=LSM3 PE=3 SV=1	1	5	91	0	30.331	4.6e-09	1206	0.00625194	4.6e-09	4.31825	9	1	1
PF3D7_0926700	Q8I2P2	PFI1310w	tr|Q8I2P2|Q8I2P2_PLAF7 Glutamine-dependent NAD(+) synthetase, putative OS=Plasmodium falciparum (isolate 3D7) OX=36329 GN=PF3D7_0926700 PE=4 SV=1	1	13	839	0	40.806	1.21e-10	1015	0.00526179	1.21e-10	3.02923	9	1	1
PF3D7_1455200.1	A0A144A2R4		tr|A0A144A2R4|A0A144A2R4_PLAF7 Methyltransferase, putative OS=Plasmodium falciparum (isolate 3D7) OX=36329 GN=PF3D7_1455200.1 PE=4 SV=1	1	6	205	0	28.044	6.46e-16	337	0.00174702	6.46e-16	27.8283	9	1	1
PF3D7_0709700	Q8IBZ2	PF07_0040	tr|Q8IBZ2|Q8IBZ2_PLAF7 Prodrug activation and resistance esterase OS=Plasmodium falciparum (isolate 3D7) OX=36329 GN=PF3D7_0709700 PE=4 SV=1	1	7	368	0	13.627	5.9e-13	731	0.00378953	5.9e-13	3.35046	9	1	1
PF3D7_0709400	Q8IBZ5	PF07_0038	tr|Q8IBZ5|Q8IBZ5_PLAF7 Cg7 protein OS=Plasmodium falciparum (isolate 3D7) OX=36329 GN=PF3D7_0709400 PE=4 SV=1	1	5	1281	0	11.473	5.9e-10	1104	0.00572317	5.9e-10	28.4192	9	1	1
PF3D7_1019900	Q8IJK2	PF10_0193	tr|Q8IJK2|Q8IJK2_PLAF7 Autophagy-related protein OS=Plasmodium falciparum (isolate 3D7) OX=36329 GN=PF3D7_1019900 PE=1 SV=1	1	5	124	0	13.279	2.94e-15	410	0.00212545	2.94e-15	28.53	9	1	1
PF3D7_0910200	Q8I350	PFI0495w	tr|Q8I350|Q8I350_PLAF7 Uncharacterized protein OS=Plasmodium falciparum (isolate 3D7) OX=36329 GN=PF3D7_0910200 PE=4 SV=1	1	17	3069	0	52.64	8.33e-09	1222	0.00633489	8.33e-09	27.1015	9	1	1
PF3D7_0904000	Q8I3A9	PFI0195c	tr|Q8I3A9|Q8I3A9_PLAF7 GTPase-activating protein, putative OS=Plasmodium falciparum (isolate 3D7) OX=36329 GN=PF3D7_0904000 PE=4 SV=1	1	8	426	0	9.0233	1.21e-15	364	0.00188699	1.21e-15	27.6803	9	1	1
PF3D7_0907600	Q8I375	PFI0365w	tr|Q8I375|Q8I375_PLAF7 Translation initiation factor SUI1, putative OS=Plasmodium falciparum (isolate 3D7) OX=36329 GN=PF3D7_0907600 PE=4 SV=1	1	11	818	0	64.337	2.34e-20	54	0.000279938	2.34e-20	27.6126	9	1	1
PF3D7_0106800	Q8I274	Rab5c	tr|Q8I274|Q8I274_PLAF7 Ras-related protein Rab-5C OS=Plasmodium falciparum (isolate 3D7) OX=36329 GN=PF3D7_0106800 PE=4 SV=2	1	9	214	0	128.2	1.93e-15	385	0.00199585	1.93e-15	3.24051	9	1	1
PF3D7_1023900	Q8IJG6	PF10_0232	tr|Q8IJG6|Q8IJG6_PLAF7 Chromodomain-helicase-DNA-binding protein 1 homolog, putative OS=Plasmodium falciparum (isolate 3D7) OX=36329 GN=PF3D7_1023900 PE=4 SV=1	1	13	3328	0	17.803	2.33e-14	538	0.00278901	2.33e-14	3.65094	9	1	1
PF3D7_0519500	Q8I3R5	PFE0980c	tr|Q8I3R5|Q8I3R5_PLAF7 CCR4 domain-containing protein 1, putative OS=Plasmodium falciparum (isolate 3D7) OX=36329 GN=PF3D7_0519500 PE=4 SV=1	1	8	2488	0	18.341	1.3e-13	652	0.00337999	1.3e-13	27.4753	9	1	1
PF3D7_0418600	Q8I1Q1	PFD0900w	tr|Q8I1Q1|Q8I1Q1_PLAF7 Regulator of chromosome condensation, putative OS=Plasmodium falciparum (isolate 3D7) OX=36329 GN=PF3D7_0418600 PE=4 SV=1	1	18	2011	0	57.759	1.02e-14	480	0.00248834	1.02e-14	26.3856	9	1	1
PF3D7_0109000	Q8I253	PFA_0440w	tr|Q8I253|Q8I253_PLAF7 Photosensitized INA-labeled protein PHIL1 OS=Plasmodium falciparum (isolate 3D7) OX=36329 GN=PF3D7_0109000 PE=4 SV=1	1	5	224	0	39.804	1.15e-13	644	0.00333852	1.15e-13	27.8902	9	1	1
PF3D7_1013500	Q8IJR0	PI PLC	tr|Q8IJR0|Q8IJR0_PLAF7 Phosphoinositide phospholipase C OS=Plasmodium falciparum (isolate 3D7) OX=36329 GN=PF3D7_1013500 PE=4 SV=2	1	16	1385	0	19.839	4.18e-18	141	0.000730949	4.18e-18	26.6736	9	1	1
PF3D7_1148000	Q8IHP1	PF11_0488	tr|Q8IHP1|Q8IHP1_PLAF7 Serine/threonine protein kinase, putative OS=Plasmodium falciparum (isolate 3D7) OX=36329 GN=PF3D7_1148000 PE=4 SV=1	1	13	1429	0	51.754	1.42e-14	505	0.00261794	1.42e-14	27.068	9	1	1
PF3D7_1460600	Q8IKM6	PF14_0578	tr|Q8IKM6|Q8IKM6_PLAF7 Inner membrane complex sub-compartment protein 3 OS=Plasmodium falciparum (isolate 3D7) OX=36329 GN=PF3D7_1460600 PE=4 SV=1	1	7	148	0	34.737	6.59e-10	1113	0.00576983	6.59e-10	3.28048	9	1	1
PF3D7_1110400	Q8IIQ7	PF11_0111	tr|Q8IIQ7|Q8IIQ7_PLAF7 RNA-binding protein, putative OS=Plasmodium falciparum (isolate 3D7) OX=36329 GN=PF3D7_1110400 PE=4 SV=1	1	8	1483	0	289.07	5.82e-11	979	0.00507517	5.82e-11	4.08416	9	1	1
PF3D7_0703200	Q8IC38	PF07_0012	tr|Q8IC38|Q8IC38_PLAF7 Uncharacterized protein OS=Plasmodium falciparum (isolate 3D7) OX=36329 GN=PF3D7_0703200 PE=4 SV=1	1	9	1540	0	28.273	3.66e-18	136	0.000705029	3.66e-18	27.2513	9	1	1
PF3D7_0919900	Q8I2V4	PFI0975c	tr|Q8I2V4|Q8I2V4_PLAF7 Regulator of chromosome condensation-PP1-interacting protein OS=Plasmodium falciparum (isolate 3D7) OX=36329 GN=PF3D7_0919900 PE=4 SV=1	1	8	3381	0	70.329	4.53e-10	1091	0.00565578	4.53e-10	27.7684	9	1	1
PF3D7_1324800	Q8IE69	DHFS-FPGS	tr|Q8IE69|Q8IE69_PLAF7 Dihydrofolate synthase/folylpolyglutamate synthase OS=Plasmodium falciparum (isolate 3D7) OX=36329 GN=PF3D7_1324800 PE=4 SV=1	1	9	522	0	26.405	7.61e-18	157	0.000813893	7.61e-18	27.1733	9	1	1
PF3D7_0107800	A0A143ZUM0		tr|A0A143ZUM0|A0A143ZUM0_PLAF7 Double-strand break repair protein MRE11 OS=Plasmodium falciparum (isolate 3D7) OX=36329 GN=PF3D7_0107800 PE=4 SV=1	1	13	1233	0	16.388	1.7e-22	14	7.26e-05	1.7e-22	27.13	9	1	1
PF3D7_1202100.2	A0A144A1V5;Q8I624	PFL0105w	tr|A0A144A1V5|A0A144A1V5_PLAF7 SRAP domain-containing protein, putative OS=Plasmodium falciparum (isolate 3D7) OX=36329 GN=PF3D7_1202100.2 PE=4 SV=1;tr|Q8I624|Q8I624_PLAF7 SRAP domain-containing protein, putative OS=Plasmodium falciparum (isolate 3D7) OX=3	2	9	400	0	57.512	3.32e-13	703	0.00364438	3.32e-13	3.68116	9	1	1
PF3D7_0707400	C0H4M1	MAL7P1.209	tr|C0H4M1|C0H4M1_PLAF7 AAA family ATPase, putative OS=Plasmodium falciparum (isolate 3D7) OX=36329 GN=PF3D7_0707400 PE=4 SV=1	1	9	663	0	51.761	1.15e-14	489	0.00253499	1.15e-14	27.2338	9	1	1
PF3D7_1463200	Q8IKK4	PF14_0601	tr|Q8IKK4|Q8IKK4_PLAF7 Replication factor C subunit 3, putative OS=Plasmodium falciparum (isolate 3D7) OX=36329 GN=PF3D7_1463200 PE=4 SV=1	1	7	344	0	99.886	5.61e-16	329	0.00170555	5.61e-16	3.86103	9	1	1
PF3D7_1031700	Q8IJ88	PF10_0311	tr|Q8IJ88|Q8IJ88_PLAF7 Protein phosphatase inhibitor 3 OS=Plasmodium falciparum (isolate 3D7) OX=36329 GN=PF3D7_1031700 PE=4 SV=2	1	2	116	0	9.2381	4.91e-07	1309	0.0067859	4.91e-07	29.3308	9	1	1
PF3D7_0824200	C0H4X4	MAL8P1.34	tr|C0H4X4|C0H4X4_PLAF7 Uncharacterized protein OS=Plasmodium falciparum (isolate 3D7) OX=36329 GN=PF3D7_0824200 PE=4 SV=1	1	13	1124	0	47.624	4.16e-14	573	0.00297045	4.16e-14	26.6414	9	1	1
PF3D7_1320900	C0H5C7	PF13_0122	tr|C0H5C7|C0H5C7_PLAF7 RNA-binding protein, putative OS=Plasmodium falciparum (isolate 3D7) OX=36329 GN=PF3D7_1320900 PE=1 SV=1	1	6	125	0	111.67	7.94e-17	245	0.00127009	7.94e-17	27.8787	9	1	1
PF3D7_0914900	Q8I303	PFI0730w	tr|Q8I303|Q8I303_PLAF7 BSD-domain protein, putative OS=Plasmodium falciparum (isolate 3D7) OX=36329 GN=PF3D7_0914900 PE=4 SV=1	1	8	709	0	25.28	2.42e-11	929	0.00481597	2.42e-11	28.2115	9	1	1
PF3D7_1431700	Q8ILE8	PF14_0296	tr|Q8ILE8|Q8ILE8_PLAF7 60S ribosomal protein L14, putative OS=Plasmodium falciparum (isolate 3D7) OX=36329 GN=PF3D7_1431700 PE=1 SV=1	1	7	165	0	16.67	3.84e-07	1306	0.00677035	3.84e-07	2.39586	9	1	1
PF3D7_1224200	Q8I5H5	PFL1165w	tr|Q8I5H5|Q8I5H5_PLAF7 BRO1 domain-containing protein, putative OS=Plasmodium falciparum (isolate 3D7) OX=36329 GN=PF3D7_1224200 PE=4 SV=2	1	11	819	0	25.126	6.6e-14	606	0.00314152	6.6e-14	27.4602	9	1	1
PF3D7_1113400	Q8IIM8	PF11_0142	tr|Q8IIM8|Q8IIM8_PLAF7 Ubiquitin domain-containing protein DSK2, putative OS=Plasmodium falciparum (isolate 3D7) OX=36329 GN=PF3D7_1113400 PE=4 SV=1	1	7	388	0	45.918	0.00108335	1416	0.00734059	0.00108335	1.62847	9	1	1
PF3D7_1248000	A0A144A1E9		tr|A0A144A1E9|A0A144A1E9_PLAF7 tRNA-splicing endonuclease, putative OS=Plasmodium falciparum (isolate 3D7) OX=36329 GN=PF3D7_1248000 PE=4 SV=1	1	7	220	0	146.52	9.59e-16	349	0.00180923	9.59e-16	28.1442	9	1	1
PF3D7_0925700	Q7K6A1	PfHDAC1	tr|Q7K6A1|Q7K6A1_PLAF7 Histone deacetylase OS=Plasmodium falciparum (isolate 3D7) OX=36329 GN=PF3D7_0925700 PE=3 SV=1	1	5	449	0	33.361	2.07e-19	77	0.000399171	2.07e-19	4.0731	9	1	1
PF3D7_0731600	Q8I6Z1	PfACS5	tr|Q8I6Z1|Q8I6Z1_PLAF7 Acyl-CoA synthetase OS=Plasmodium falciparum (isolate 3D7) OX=36329 GN=PF3D7_0731600 PE=4 SV=1	1	16	811	0	83.968	0.002254	1419	0.00735614	0.002254	1.56376	9	1	1
PF3D7_1455500	Q8IKS3	PF14_0529	tr|Q8IKS3|Q8IKS3_PLAF7 AP-1 complex subunit gamma, putative OS=Plasmodium falciparum (isolate 3D7) OX=36329 GN=PF3D7_1455500 PE=4 SV=1	1	13	1081	0	87.37	2.33e-15	400	0.00207361	2.33e-15	28.2009	9	1	1
PF3D7_1128100	Q8II82	PF11_0292	tr|Q8II82|Q8II82_PLAF7 Prefoldin subunit 5, putative OS=Plasmodium falciparum (isolate 3D7) OX=36329 GN=PF3D7_1128100 PE=4 SV=1	1	7	248	0	29.514	4.82e-11	963	0.00499222	4.82e-11	3.71801	9	1	1
PF3D7_1430300	Q8ILG1	PF14_0282	tr|Q8ILG1|Q8ILG1_PLAF7 Acid phosphatase, putative OS=Plasmodium falciparum (isolate 3D7) OX=36329 GN=PF3D7_1430300 PE=3 SV=1	1	11	2657	0	41.714	2.74e-16	295	0.00152929	2.74e-16	28.7737	9	1	1
PF3D7_0512700	Q8I3Y0	PfOPRT	tr|Q8I3Y0|Q8I3Y0_PLAF7 Orotate phosphoribosyltransferase OS=Plasmodium falciparum (isolate 3D7) OX=36329 GN=PF3D7_0512700 PE=3 SV=1	1	6	281	0	43.362	2.57e-13	684	0.00354588	2.57e-13	28.3506	9	1	1
PF3D7_0719000	Q8IBR1	MAL7P1.98	tr|Q8IBR1|Q8IBR1_PLAF7 Uncharacterized protein OS=Plasmodium falciparum (isolate 3D7) OX=36329 GN=PF3D7_0719000 PE=4 SV=1	1	7	153	0	26.918	7.76e-11	995	0.00515811	7.76e-11	27.672	9	1	1
PF3D7_1018200	C6S3C9	PF10_0177a	tr|C6S3C9|C6S3C9_PLAF7 Serine/threonine-protein phosphatase OS=Plasmodium falciparum (isolate 3D7) OX=36329 GN=PF3D7_1018200 PE=3 SV=1	1	16	2166	0	74.904	9.42e-14	634	0.00328668	9.42e-14	26.639	9	1	1
PF3D7_0110500	Q8I240	PFA_0510w	tr|Q8I240|Q8I240_PLAF7 Bromodomain protein, putative OS=Plasmodium falciparum (isolate 3D7) OX=36329 GN=PF3D7_0110500 PE=1 SV=1	1	14	2285	0	45.476	4.59e-21	40	0.000207361	4.59e-21	26.9152	9	1	1
PF3D7_0309000	O77334	PFC0380w	tr|O77334|O77334_PLAF7 Dual specificity protein phosphatase OS=Plasmodium falciparum (isolate 3D7) OX=36329 GN=PF3D7_0309000 PE=4 SV=3	1	8	575	0	22.37	2.25e-12	806	0.00417833	2.25e-12	27.5763	9	1	1
PF3D7_0922400	Q8I2T0	PFI1100w	tr|Q8I2T0|Q8I2T0_PLAF7 Para-aminobenzoic acid synthetase OS=Plasmodium falciparum (isolate 3D7) OX=36329 GN=PF3D7_0922400 PE=4 SV=1	1	14	979	0	86.369	3.53e-12	826	0.00428201	3.53e-12	26.6115	9	1	1
PF3D7_0202600.2	A0A143ZY32;O96129	PFB0125c	tr|A0A143ZY32|A0A143ZY32_PLAF7 Nucleic acid binding protein, putative OS=Plasmodium falciparum (isolate 3D7) OX=36329 GN=PF3D7_0202600.2 PE=4 SV=1;tr|O96129|O96129_PLAF7 Nucleic acid binding protein, putative OS=Plasmodium falciparum (isolate 3D7) OX=36329	2	11	1340	0	32.154	1.91e-13	663	0.00343701	1.91e-13	27.4269	9	1	1
PF3D7_1341900	Q8IDS0	PF13_0227	tr|Q8IDS0|Q8IDS0_PLAF7 V-type proton ATPase subunit D, putative OS=Plasmodium falciparum (isolate 3D7) OX=36329 GN=PF3D7_1341900 PE=4 SV=1	1	9	247	0	16.112	8.53e-12	868	0.00449974	8.53e-12	4.13274	9	1	1
PF3D7_0916400	C0H539	PFI0805w	tr|C0H539|C0H539_PLAF7 Uncharacterized protein OS=Plasmodium falciparum (isolate 3D7) OX=36329 GN=PF3D7_0916400 PE=4 SV=1	1	16	2519	0	71.784	3.93e-14	569	0.00294971	3.93e-14	26.3959	9	1	1
PF3D7_0104200	Q8I298	PFA_0210c	tr|Q8I298|Q8I298_PLAF7 StAR-related lipid transfer protein OS=Plasmodium falciparum (isolate 3D7) OX=36329 GN=PF3D7_0104200 PE=4 SV=1	1	11	466	0	21.996	4.4e-07	1308	0.00678071	4.4e-07	2.52709	9	1	1
PF3D7_0912800	Q8I324	PFI0625c	tr|Q8I324|Q8I324_PLAF7 tRNA (Adenine(58)-N(1))-methyltransferase non-catalytic subunit TRM6, putative OS=Plasmodium falciparum (isolate 3D7) OX=36329 GN=PF3D7_0912800 PE=4 SV=1	1	10	616	0	9.6007	5.43e-09	1210	0.00627268	5.43e-09	27.1557	9	1	1
PF3D7_1116100	C6S3F2	PF11_0168a	tr|C6S3F2|C6S3F2_PLAF7 Serine esterase, putative OS=Plasmodium falciparum (isolate 3D7) OX=36329 GN=PF3D7_1116100 PE=4 SV=1	1	11	1830	0	37.105	2.56e-16	290	0.00150337	2.56e-16	27.4088	9	1	1
PF3D7_1348600	A0A5K1K8Z2		tr|A0A5K1K8Z2|A0A5K1K8Z2_PLAF7 Uncharacterized protein OS=Plasmodium falciparum (isolate 3D7) OX=36329 GN=PF3D7_1348600 PE=4 SV=1	1	9	371	0	55.37	5.29e-20	61	0.000316226	5.29e-20	27.067	9	1	1
PF3D7_0628600	C6KTC1	PFF1385c	tr|C6KTC1|C6KTC1_PLAF7 DNA methyltransferase 1-associated protein 1, putative OS=Plasmodium falciparum (isolate 3D7) OX=36329 GN=PF3D7_0628600 PE=4 SV=1	1	9	385	0	35.726	1.03e-13	638	0.00330741	1.03e-13	27.0066	9	1	1
PF3D7_1469700	Q8IKE0	PF14_0665	tr|Q8IKE0|Q8IKE0_PLAF7 Mediator of RNA polymerase II transcription subunit 6 OS=Plasmodium falciparum (isolate 3D7) OX=36329 GN=MED6 PE=3 SV=1	1	5	205	0	67.26	1.83e-07	1290	0.0066874	1.83e-07	28.4966	9	1	1
PF3D7_0520700	Q8I3Q4	PFE1040c	tr|Q8I3Q4|Q8I3Q4_PLAF7 CDC73 domain-containing protein, putative OS=Plasmodium falciparum (isolate 3D7) OX=36329 GN=PF3D7_0520700 PE=4 SV=1	1	11	974	0	123.37	4.12e-14	572	0.00296527	4.12e-14	27.1296	9	1	1
PF3D7_1469200	Q8IKE5	PF14_0660	tr|Q8IKE5|Q8IKE5_PLAF7 Shewanella-like protein phosphatase 1, putative OS=Plasmodium falciparum (isolate 3D7) OX=36329 GN=PF3D7_1469200 PE=4 SV=1	1	7	358	0	6.8665	6.92e-11	988	0.00512182	6.92e-11	28.4012	9	1	1
PF3D7_1216900	Q8I5N9	PFL0815w	tr|Q8I5N9|Q8I5N9_PLAF7 DNA-binding chaperone, putative OS=Plasmodium falciparum (isolate 3D7) OX=36329 GN=PF3D7_1216900 PE=4 SV=1	1	10	939	0	32.942	5e-14	581	0.00301192	5e-14	4.08577	9	1	1
PF3D7_1022400	Q8IJI0	PF10_0217	tr|Q8IJI0|Q8IJI0_PLAF7 Serine/arginine-rich splicing factor 4 OS=Plasmodium falciparum (isolate 3D7) OX=36329 GN=PF3D7_1022400 PE=4 SV=1	1	6	538	0	16.908	8.7e-15	471	0.00244168	8.7e-15	3.02071	9	1	1
PF3D7_1126400	Q8IIA0	PF11_0274	tr|Q8IIA0|Q8IIA0_PLAF7 Mediator of RNA polymerase II transcription subunit 21, putative OS=Plasmodium falciparum (isolate 3D7) OX=36329 GN=PF3D7_1126400 PE=4 SV=1	1	5	181	0	7.7876	4.36e-08	1264	0.00655262	4.36e-08	28.0848	9	1	1
PF3D7_0718500	Q8IBR6	MAL7P1.94	tr|Q8IBR6|Q8IBR6_PLAF7 Prefoldin subunit 3 OS=Plasmodium falciparum (isolate 3D7) OX=36329 GN=PF3D7_0718500 PE=3 SV=1	1	5	192	0	31.897	2.17e-13	673	0.00348885	2.17e-13	3.89248	9	1	1
PF3D7_1468900	Q8IKE8	PF14_0657	tr|Q8IKE8|Q8IKE8_PLAF7 Zinc finger protein, putative OS=Plasmodium falciparum (isolate 3D7) OX=36329 GN=PF3D7_1468900 PE=4 SV=1	1	12	813	0.0087135	-0.68633	2.22e-17	197	0.00102125	2.22e-17	3.75681	9	1	1
PF3D7_1420900	Q8ILP1	PF14_0774	tr|Q8ILP1|Q8ILP1_PLAF7 Mannose-1-phosphate guanyltransferase, putative OS=Plasmodium falciparum (isolate 3D7) OX=36329 GN=PF3D7_1420900 PE=4 SV=1	1	9	408	0	21.196	1.85e-14	524	0.00271643	1.85e-14	26.9099	9	1	1
PF3D7_0916700	Q8I2Y5	PFI0820c	tr|Q8I2Y5|Q8I2Y5_PLAF7 RNA-binding protein musashi, putative OS=Plasmodium falciparum (isolate 3D7) OX=36329 GN=PF3D7_0916700 PE=4 SV=1	1	5	388	0	27.956	2.23e-09	1169	0.00606014	2.23e-09	3.04811	9	1	1
PF3D7_1226400	Q8I5F3	PFL1275c	tr|Q8I5F3|Q8I5F3_PLAF7 Mic1 domain-containing protein OS=Plasmodium falciparum (isolate 3D7) OX=36329 GN=PF3D7_1226400 PE=4 SV=2	1	10	856	0	99.394	5.71e-18	149	0.000772421	5.71e-18	27.4032	9	1	1
PF3D7_1446700	A0A144A260;Q8IL06	PF14_0444	tr|A0A144A260|A0A144A260_PLAF7 Uncharacterized protein OS=Plasmodium falciparum (isolate 3D7) OX=36329 GN=PF3D7_1446700 PE=4 SV=1;sp|Q8IL06|YPF07_PLAF7 Uncharacterized protein PF14_0444 OS=Plasmodium falciparum (isolate 3D7) OX=36329 GN=PF14_0444 PE=1 SV=2	2	9	357	0	19.111	1.88e-17	188	0.000974598	1.88e-17	26.995	9	1	1
PF3D7_1017000	Q7KQL4	PF10_0165	tr|Q7KQL4|Q7KQL4_PLAF7 DNA polymerase OS=Plasmodium falciparum (isolate 3D7) OX=36329 GN=PF3D7_1017000 PE=3 SV=1	1	7	1094	0	5.2809	7.49e-10	1122	0.00581648	7.49e-10	28.4697	9	1	1
PF3D7_1364800	Q8ID59	PF13_0341	tr|Q8ID59|Q8ID59_PLAF7 DNA-directed RNA polymerases I, II, and III subunit RPABC1, putative OS=Plasmodium falciparum (isolate 3D7) OX=36329 GN=PF3D7_1364800 PE=3 SV=1	1	8	205	0	7.5498	1.85e-07	1292	0.00669777	1.85e-07	27.5337	9	1	1
PF3D7_1121100	Q8IIF6	PF11_0218	tr|Q8IIF6|Q8IIF6_PLAF7 Uncharacterized protein OS=Plasmodium falciparum (isolate 3D7) OX=36329 GN=PF3D7_1121100 PE=4 SV=2	1	14	1544	0	18.264	3.81e-11	952	0.0049352	3.81e-11	26.6993	9	1	1
PF3D7_0720000	Q8IBQ2	MAL7P1.104	tr|Q8IBQ2|Q8IBQ2_PLAF7 Exosome complex component CSL4, putative OS=Plasmodium falciparum (isolate 3D7) OX=36329 GN=PF3D7_0720000 PE=4 SV=1	1	4	195	0	34.351	4.53e-09	1204	0.00624158	4.53e-09	27.7612	9	1	1
PF3D7_0707700	Q8IC12	PF07_0026	tr|Q8IC12|Q8IC12_PLAF7 E3 ubiquitin-protein ligase, putative OS=Plasmodium falciparum (isolate 3D7) OX=36329 GN=PF3D7_0707700 PE=4 SV=1	1	9	961	0	16.846	6.72e-17	236	0.00122343	6.72e-17	27.0488	9	1	1
PF3D7_1008800	Q8IJV7	PF10_0085	tr|Q8IJV7|Q8IJV7_PLAF7 Nucleolar protein 5, putative OS=Plasmodium falciparum (isolate 3D7) OX=36329 GN=PF3D7_1008800 PE=4 SV=1	1	9	469	0	44.571	3.71e-16	307	0.0015915	3.71e-16	3.14996	9	1	1
PF3D7_0526800	Q8I3J7	PFE1335c	tr|Q8I3J7|Q8I3J7_PLAF7 Uncharacterized protein OS=Plasmodium falciparum (isolate 3D7) OX=36329 GN=PF3D7_0526800 PE=4 SV=1	1	6	368	0	21.166	1.33e-07	1286	0.00666667	1.33e-07	27.8425	9	1	1
PF3D7_1011700	Q8IJS8	PF10_0114	tr|Q8IJS8|Q8IJS8_PLAF7 DNA repair protein RAD23, putative OS=Plasmodium falciparum (isolate 3D7) OX=36329 GN=PF3D7_1011700 PE=4 SV=1	1	4	389	0	5.1871	4.85e-05	1382	0.00716433	4.85e-05	1.31461	9	1	1
PF3D7_1015300	Q8IJP2	PF10_0150	tr|Q8IJP2|Q8IJP2_PLAF7 Methionine aminopeptidase OS=Plasmodium falciparum (isolate 3D7) OX=36329 GN=PF3D7_1015300 PE=1 SV=1	1	10	517	0	39.25	7.1e-13	741	0.00384137	7.1e-13	27.005	9	1	1
PF3D7_0723600	Q8IBL7	PF07_0099	tr|Q8IBL7|Q8IBL7_PLAF7 Proteasome assembly chaperone 4, putative OS=Plasmodium falciparum (isolate 3D7) OX=36329 GN=PF3D7_0723600 PE=4 SV=1	1	2	149	0	75.277	7.94e-11	996	0.0051633	7.94e-11	28.5994	9	1	1
PF3D7_1414000	Q8ILV5	PF14_0138	tr|Q8ILV5|Q8ILV5_PLAF7 26S proteasome regulatory subunit RPN13, putative OS=Plasmodium falciparum (isolate 3D7) OX=36329 GN=PF3D7_1414000 PE=4 SV=2	1	4	253	0	26.716	1.05e-09	1137	0.00589425	1.05e-09	4.84039	9	1	1
PF3D7_1124100	Q8IIC2	PF11_0252	tr|Q8IIC2|Q8IIC2_PLAF7 BEACH domain-containing protein, putative OS=Plasmodium falciparum (isolate 3D7) OX=36329 GN=PF3D7_1124100 PE=4 SV=1	1	14	1653	0	70.495	1.4e-14	503	0.00260757	1.4e-14	27.0673	9	1	1
PF3D7_1122400	Q8IIE2	PF11_0232	tr|Q8IIE2|Q8IIE2_PLAF7 Uncharacterized protein OS=Plasmodium falciparum (isolate 3D7) OX=36329 GN=PF3D7_1122400 PE=4 SV=1	1	9	851	0	7.2915	4.08e-19	90	0.000466563	4.08e-19	28.1031	9	1	1
PF3D7_1357900	Q8IDC6	MAL13P1.284	tr|Q8IDC6|Q8IDC6_PLAF7 Pyrroline-5-carboxylate reductase, putative OS=Plasmodium falciparum (isolate 3D7) OX=36329 GN=PF3D7_1357900 PE=1 SV=1	1	7	262	0	43.061	1.21e-06	1327	0.00687921	1.21e-06	1.72983	9	1	1
PF3D7_1415200	Q8ILU4	PF14_0150	tr|Q8ILU4|Q8ILU4_PLAF7 DNA-directed RNA polymerases I and III subunit RPAC2, putative OS=Plasmodium falciparum (isolate 3D7) OX=36329 GN=PF3D7_1415200 PE=4 SV=1	1	3	96	0	81.009	1.27e-06	1329	0.00688958	1.27e-06	28.4631	9	1	1
PF3D7_1107200	Q8IIT1	PF11_0084	tr|Q8IIT1|Q8IIT1_PLAF7 Uncharacterized protein OS=Plasmodium falciparum (isolate 3D7) OX=36329 GN=PF3D7_1107200 PE=4 SV=2	1	9	713	0	15.384	3.01e-22	17	8.81e-05	3.01e-22	27.4598	9	1	1
PF3D7_0907300	Q8I378	PFI0350c	tr|Q8I378|Q8I378_PLAF7 Prefoldin-like protein, putative OS=Plasmodium falciparum (isolate 3D7) OX=36329 GN=PF3D7_0907300 PE=4 SV=1	1	5	258	0	119.62	2.34e-08	1251	0.00648523	2.34e-08	28.1153	9	1	1
PF3D7_1035700	Q8IJ52	PF10_0348	tr|Q8IJ52|Q8IJ52_PLAF7 Duffy binding-like merozoite surface protein OS=Plasmodium falciparum (isolate 3D7) OX=36329 GN=PF3D7_1035700 PE=4 SV=1	1	11	697	0	12.312	2.44e-05	1371	0.00710731	2.44e-05	2.52336	9	1	1
PF3D7_1426000	Q8ILK3	PF14_0240	tr|Q8ILK3|Q8ILK3_PLAF7 60S ribosomal protein L21 OS=Plasmodium falciparum (isolate 3D7) OX=36329 GN=PF3D7_1426000 PE=1 SV=1	1	3	161	0	40.968	3.08e-05	1375	0.00712805	3.08e-05	1.34782	9	1	1
PF3D7_1034000	Q8IJ69	PF10_0331	tr|Q8IJ69|Q8IJ69_PLAF7 Sec1 family protein, putative OS=Plasmodium falciparum (isolate 3D7) OX=36329 GN=PF3D7_1034000 PE=3 SV=2	1	8	663	0	61.565	1.51e-16	274	0.00142042	1.51e-16	26.9034	9	1	1
PF3D7_0519400	Q8I3R6	PFE0975c	tr|Q8I3R6|Q8I3R6_PLAF7 40S ribosomal protein S24 OS=Plasmodium falciparum (isolate 3D7) OX=36329 GN=PF3D7_0519400 PE=1 SV=1	1	5	133	0	9.0236	1.8e-06	1333	0.00691032	1.8e-06	2.99113	9	1	1
PF3D7_1247500	Q8I4V7	PFL2280w	tr|Q8I4V7|Q8I4V7_PLAF7 Serine/threonine protein kinase, putative OS=Plasmodium falciparum (isolate 3D7) OX=36329 GN=PF3D7_1247500 PE=4 SV=1	1	11	909	0	33.492	8.37e-17	248	0.00128564	8.37e-17	27.0055	9	1	1
PF3D7_0929000	Q8I2M0	PFI1425w	tr|Q8I2M0|Q8I2M0_PLAF7 Transcription initiation factor TFIID subunit 7, putative OS=Plasmodium falciparum (isolate 3D7) OX=36329 GN=PF3D7_0929000 PE=4 SV=1	1	10	397	0	170.92	2.62e-21	35	0.000181441	2.62e-21	26.8032	9	1	1
PF3D7_0828500	Q8IBB6	PF08_0009	tr|Q8IBB6|Q8IBB6_PLAF7 Translation initiation factor eIF-2B subunit alpha, putative OS=Plasmodium falciparum (isolate 3D7) OX=36329 GN=PF3D7_0828500 PE=3 SV=1	1	7	342	0	69.489	6e-15	442	0.00229134	6e-15	27.1305	9	1	1
PF3D7_1423300	Q8ILL9	PP7	tr|Q8ILL9|Q8ILL9_PLAF7 Serine/threonine-protein phosphatase OS=Plasmodium falciparum (isolate 3D7) OX=36329 GN=PF3D7_1423300 PE=3 SV=1	1	12	959	0	21.805	5.32e-17	229	0.00118714	5.32e-17	26.6457	9	1	1
PF3D7_1311400	Q8IEK4	PF13_0062	tr|Q8IEK4|Q8IEK4_PLAF7 AP-1 complex subunit mu-1 OS=Plasmodium falciparum (isolate 3D7) OX=36329 GN=PF3D7_1311400 PE=3 SV=1	1	7	437	0	9.5722	1.56e-14	509	0.00263867	1.56e-14	27.612	9	1	1
PF3D7_0218700	O96267	PFB0875c	tr|O96267|O96267_PLAF7 Pre-mRNA-processing protein 45, putative OS=Plasmodium falciparum (isolate 3D7) OX=36329 GN=PF3D7_0218700 PE=4 SV=3	1	7	482	0	23.797	2.48e-10	1060	0.00549508	2.48e-10	27.2267	9	1	1
PF3D7_0604500	C6KSP3	PFF0220w	tr|C6KSP3|C6KSP3_PLAF7 GYF domain-containing protein OS=Plasmodium falciparum (isolate 3D7) OX=36329 GN=PF3D7_0604500 PE=4 SV=1	1	8	2874	0	6.1007	3.47e-13	705	0.00365474	3.47e-13	27.2859	9	1	1
PF3D7_1458400	Q8IKP7	PF14_0557	tr|Q8IKP7|Q8IKP7_PLAF7 Aminodeoxychorismate lyase OS=Plasmodium falciparum (isolate 3D7) OX=36329 GN=PF3D7_1458400 PE=4 SV=1	1	6	316	0	12.534	3.77e-18	139	0.000720581	3.77e-18	3.95064	9	1	1
PF3D7_1127600	Q8II87	PF11_0287	tr|Q8II87|Q8II87_PLAF7 CRAL/TRIO domain-containing protein, putative OS=Plasmodium falciparum (isolate 3D7) OX=36329 GN=PF3D7_1127600 PE=4 SV=2	1	8	297	0	24.029	4.62e-05	1381	0.00715915	4.62e-05	2.37382	9	1	1
PF3D7_1119500	Q8IIH2	PF11_0202	tr|Q8IIH2|Q8IIH2_PLAF7 AP-4 complex subunit mu, putative OS=Plasmodium falciparum (isolate 3D7) OX=36329 GN=PF3D7_1119500 PE=3 SV=1	1	8	436	0	20.536	3.69e-16	306	0.00158631	3.69e-16	27.479	9	1	1
PF3D7_0518500	A0A5K1K868		tr|A0A5K1K868|A0A5K1K868_PLAF7 ATP-dependent RNA helicase DDX23, putative OS=Plasmodium falciparum (isolate 3D7) OX=36329 GN=PF3D7_0518500 PE=4 SV=1	1	12	1123	0	94.468	2.02e-16	281	0.00145671	2.02e-16	26.5341	9	1	1
PF3D7_1144000	Q8IHS5	PF11_0454	tr|Q8IHS5|Q8IHS5_PLAF7 40S ribosomal protein S21 OS=Plasmodium falciparum (isolate 3D7) OX=36329 GN=PF3D7_1144000 PE=1 SV=1	1	3	82	0	2.0443	8.71e-10	1131	0.00586314	8.71e-10	2.84168	9	1	1
PF3D7_0503800	Q8I463	PFE0185c	tr|Q8I463|Q8I463_PLAF7 60S ribosomal protein L31 OS=Plasmodium falciparum (isolate 3D7) OX=36329 GN=PF3D7_0503800 PE=1 SV=1	1	2	120	0	4.8405	1.22e-10	1017	0.00527216	1.22e-10	2.77006	9	1	1
PF3D7_1346500	A0A5K1K8P9		tr|A0A5K1K8P9|A0A5K1K8P9_PLAF7 Uncharacterized protein OS=Plasmodium falciparum (isolate 3D7) OX=36329 GN=PF3D7_1346500 PE=4 SV=1	1	8	595	0	78.538	4.06e-06	1345	0.00697253	4.06e-06	27.1682	9	1	1
PF3D7_1466800	Q8IKG9	PF14_0636	tr|Q8IKG9|Q8IKG9_PLAF7 NOC3p domain-containing protein OS=Plasmodium falciparum (isolate 3D7) OX=36329 GN=PF3D7_1466800 PE=4 SV=1	1	6	902	0	31.314	1.97e-18	119	0.0006169	1.97e-18	27.2209	9	1	1
PF3D7_1345600	A0A5K1K8Y1		tr|A0A5K1K8Y1|A0A5K1K8Y1_PLAF7 Inner membrane complex protein OS=Plasmodium falciparum (isolate 3D7) OX=36329 GN=PF3D7_1345600 PE=4 SV=1	1	9	370	0	21.667	3.83e-09	1197	0.00620529	3.83e-09	27.2833	9	1	1
PF3D7_0509400	Q8I410	PFE0465c	tr|Q8I410|Q8I410_PLAF7 DNA-directed RNA polymerase subunit OS=Plasmodium falciparum (isolate 3D7) OX=36329 GN=PF3D7_0509400 PE=3 SV=1	1	17	2914	0	30.584	6.66e-12	856	0.00443753	6.66e-12	26.5235	9	1	1
PF3D7_0715300	A0A143ZZT8		tr|A0A143ZZT8|A0A143ZZT8_PLAF7 Calcium/calmodulin-dependent protein kinase, putative OS=Plasmodium falciparum (isolate 3D7) OX=36329 GN=PF3D7_0715300 PE=4 SV=1	1	8	517	0	154.99	6.17e-15	446	0.00231208	6.17e-15	27.0073	9	1	1
PF3D7_0801700	C0H4Y4	MAL8P1.157	tr|C0H4Y4|C0H4Y4_PLAF7 Sentrin-specific protease 2, putative OS=Plasmodium falciparum (isolate 3D7) OX=36329 GN=PF3D7_0801700 PE=4 SV=1	1	9	1784	0	65.042	2.17e-14	533	0.00276309	2.17e-14	27.5403	9	1	1
PF3D7_0813400	C0H4U5	PF08_0081	tr|C0H4U5|C0H4U5_PLAF7 Uncharacterized protein OS=Plasmodium falciparum (isolate 3D7) OX=36329 GN=PF3D7_0813400 PE=4 SV=1	1	4	659	0	6.9864	1.63e-08	1243	0.00644375	1.63e-08	2.55857	9	1	1
PF3D7_1238600	Q8I537	PFL1870c	tr|Q8I537|Q8I537_PLAF7 Sphingomyelin phosphodiesterase OS=Plasmodium falciparum (isolate 3D7) OX=36329 GN=PF3D7_1238600 PE=4 SV=1	1	6	393	0	28.26	2.09e-16	283	0.00146708	2.09e-16	27.1086	9	1	1
PF3D7_1309500	Q8I700	PF13_0051	tr|Q8I700|Q8I700_PLAF7 H/ACA ribonucleoprotein complex subunit OS=Plasmodium falciparum (isolate 3D7) OX=36329 GN=PF3D7_1309500 PE=3 SV=1	1	6	209	0	45.498	5.99e-19	96	0.000497667	5.99e-19	27.2468	9	1	1
PF3D7_0513800	Q8I3W9	Rab1a	tr|Q8I3W9|Q8I3W9_PLAF7 Ras-related protein Rab-1A OS=Plasmodium falciparum (isolate 3D7) OX=36329 GN=PF3D7_0513800 PE=4 SV=1	1	5	207	0	10.765	1.3e-11	894	0.00463453	1.3e-11	3.2279	9	1	1
PF3D7_0210200	A0A143ZWL6;O96185	PFB0460c	tr|A0A143ZWL6|A0A143ZWL6_PLAF7 Uncharacterized protein OS=Plasmodium falciparum (isolate 3D7) OX=36329 GN=PF3D7_0210200 PE=4 SV=1;sp|O96185|YPF08_PLAF7 Uncharacterized protein PFB0460c OS=Plasmodium falciparum (isolate 3D7) OX=36329 GN=PFB0460c PE=1 SV=1	2	14	2588	0	23.27	1.36e-11	895	0.00463971	1.36e-11	27.0047	9	1	1
PF3D7_1111100	Q8IIQ1	PF11_0117	tr|Q8IIQ1|Q8IIQ1_PLAF7 Replication factor C subunit 5, putative OS=Plasmodium falciparum (isolate 3D7) OX=36329 GN=PF3D7_1111100 PE=4 SV=1	1	6	349	0	71.546	5.09e-18	145	0.000751685	5.09e-18	27.3837	9	1	1
PF3D7_1105700	A0A143ZZZ9;Q8IIU6	PF11_0068	tr|A0A143ZZZ9|A0A143ZZZ9_PLAF7 RNA-splicing ligase RtcB homolog OS=Plasmodium falciparum (isolate 3D7) OX=36329 GN=PF3D7_1105700 PE=3 SV=1;sp|Q8IIU6|RTCB_PLAF7 RNA-splicing ligase RtcB homolog OS=Plasmodium falciparum (isolate 3D7) OX=36329 GN=PF11_0068 PE	2	9	506	0	14.281	4.71e-11	962	0.00498704	4.71e-11	3.87061	9	1	1
PF3D7_0522800	Q8I3N5	PFE1140c	tr|Q8I3N5|Q8I3N5_PLAF7 Pre-mRNA-splicing factor BUD31, putative OS=Plasmodium falciparum (isolate 3D7) OX=36329 GN=PF3D7_0522800 PE=4 SV=1	1	6	147	0	2.7921	2.03e-15	389	0.00201659	2.03e-15	27.5634	9	1	1
PF3D7_1117100	Q8IIJ6	PF11_0177	tr|Q8IIJ6|Q8IIJ6_PLAF7 Ubiquitin carboxyl-terminal hydrolase UCH54 OS=Plasmodium falciparum (isolate 3D7) OX=36329 GN=PF3D7_1117100 PE=4 SV=1	1	8	465	0	29.142	8.87e-11	1003	0.00519958	8.87e-11	3.58112	9	1	1
PF3D7_1241700	Q8I512	PFL2005w	tr|Q8I512|Q8I512_PLAF7 Replication factor C subunit 4, putative OS=Plasmodium falciparum (isolate 3D7) OX=36329 GN=PF3D7_1241700 PE=4 SV=1	1	10	336	0	61.125	5.09e-16	321	0.00166408	5.09e-16	3.54562	9	1	1
PF3D7_1335700	Q8IDX3	PF13_0199	tr|Q8IDX3|Q8IDX3_PLAF7 Conserved oligomeric Golgi complex subunit 3, putative OS=Plasmodium falciparum (isolate 3D7) OX=36329 GN=PF3D7_1335700 PE=4 SV=1	1	11	1609	0	11.17	2.49e-15	404	0.00209435	2.49e-15	26.668	9	1	1
PF3D7_0829400	C0H4Z0	MAL8P1.8	tr|C0H4Z0|C0H4Z0_PLAF7 Prolyl 4-hydroxylase subunit alpha, putative OS=Plasmodium falciparum (isolate 3D7) OX=36329 GN=PF3D7_0829400 PE=4 SV=1	1	8	441	0	105.76	7.12e-16	341	0.00176775	7.12e-16	26.9612	9	1	1
PF3D7_0410900	Q9U0H9	PFD0540c	tr|Q9U0H9|Q9U0H9_PLAF7 Uncharacterized protein OS=Plasmodium falciparum (isolate 3D7) OX=36329 GN=PF3D7_0410900 PE=4 SV=1	1	9	977	0	15.089	2.92e-16	298	0.00154484	2.92e-16	26.9088	9	1	1
PF3D7_0316500	O77390	PFC0720w	tr|O77390|O77390_PLAF7 Kinetochore protein NUF2, putative OS=Plasmodium falciparum (isolate 3D7) OX=36329 GN=PF3D7_0316500 PE=4 SV=2	1	9	461	0	7.0449	2.43e-14	542	0.00280975	2.43e-14	27.1301	9	1	1
PF3D7_1216200	Q8I5P5	PFL0780w	tr|Q8I5P5|Q8I5P5_PLAF7 Glycerol-3-phosphate dehydrogenase [NAD(+)] OS=Plasmodium falciparum (isolate 3D7) OX=36329 GN=PF3D7_1216200 PE=1 SV=1	1	8	367	0	18.635	0.000580033	1405	0.00728357	0.000580033	1.74623	9	1	1
PF3D7_0917800	Q8I2X5	PFI0870w	tr|Q8I2X5|Q8I2X5_PLAF7 Uncharacterized protein OS=Plasmodium falciparum (isolate 3D7) OX=36329 GN=PF3D7_0917800 PE=4 SV=1	1	4	437	0	8.0483	9.56e-16	348	0.00180404	9.56e-16	27.355	9	1	1
PF3D7_1312800	Q8IEJ4	PF13_0072	tr|Q8IEJ4|Q8IEJ4_PLAF7 Uncharacterized protein OS=Plasmodium falciparum (isolate 3D7) OX=36329 GN=PF3D7_1312800 PE=4 SV=1	1	8	2361	0	33.09	4.25e-10	1085	0.00562468	4.25e-10	26.8138	9	1	1
PF3D7_1352800	Q8IDH2	PF13_0274	tr|Q8IDH2|Q8IDH2_PLAF7 Vacuolar fusion protein MON1, putative OS=Plasmodium falciparum (isolate 3D7) OX=36329 GN=PF3D7_1352800 PE=4 SV=1	1	10	884	0	41.372	6.01e-14	598	0.00310005	6.01e-14	26.5749	9	1	1
PF3D7_1244800	Q8I4Y3	PFL2150c	tr|Q8I4Y3|Q8I4Y3_PLAF7 Translation machinery-associated protein 46, putative OS=Plasmodium falciparum (isolate 3D7) OX=36329 GN=PF3D7_1244800 PE=4 SV=1	1	5	335	0	14.099	1.28e-16	266	0.00137895	1.28e-16	27.3477	9	1	1
PF3D7_1461300	Q8IKL9	PF14_0585	tr|Q8IKL9|Q8IKL9_PLAF7 40S ribosomal protein S28e, putative OS=Plasmodium falciparum (isolate 3D7) OX=36329 GN=PF3D7_1461300 PE=1 SV=1	1	3	67	0	12.469	4.06e-11	955	0.00495075	4.06e-11	1.74444	9	1	1
PF3D7_1333400	C0H5F2	MAL13P1.172	tr|C0H5F2|C0H5F2_PLAF7 AMMECR1 domain-containing protein OS=Plasmodium falciparum (isolate 3D7) OX=36329 GN=PF3D7_1333400 PE=4 SV=1	1	5	238	0	15.232	2.45e-08	1253	0.00649559	2.45e-08	1.65851	9	1	1
PF3D7_1367100	Q8ID37	MAL13P1.338	tr|Q8ID37|Q8ID37_PLAF7 U1 small nuclear ribonucleoprotein 70 kDa homolog, putative OS=Plasmodium falciparum (isolate 3D7) OX=36329 GN=PF3D7_1367100 PE=4 SV=1	1	6	423	0	6.7262	1.73e-12	789	0.0040902	1.73e-12	27.0038	9	1	1
PF3D7_1243900	Q8I4Z1	PFL2110c	tr|Q8I4Z1|Q8I4Z1_PLAF7 Double C2-like domain-containing protein OS=Plasmodium falciparum (isolate 3D7) OX=36329 GN=PF3D7_1243900 PE=4 SV=1	1	10	1846	0	13.942	6.43e-17	234	0.00121306	6.43e-17	27.3317	9	1	1
PF3D7_1468400	A0A144A3J8		tr|A0A144A3J8|A0A144A3J8_PLAF7 Zinc finger protein, putative OS=Plasmodium falciparum (isolate 3D7) OX=36329 GN=PF3D7_1468400 PE=4 SV=1	1	4	862	0	60.807	1.14e-15	358	0.00185588	1.14e-15	27.8813	9	1	1
PF3D7_0629400	C6KTC9	PFF1425w	tr|C6KTC9|C6KTC9_PLAF7 Polyadenylate-binding protein 3, putative OS=Plasmodium falciparum (isolate 3D7) OX=36329 GN=PF3D7_0629400 PE=4 SV=1	1	7	780	0	36.38	2.71e-11	935	0.00484707	2.71e-11	27.5462	9	1	1
PF3D7_1315300	Q8IEG2	PF13_0086	tr|Q8IEG2|Q8IEG2_PLAF7 Uncharacterized protein OS=Plasmodium falciparum (isolate 3D7) OX=36329 GN=PF3D7_1315300 PE=4 SV=1	1	4	477	0	9.2909	1.12e-13	643	0.00333333	1.12e-13	27.3084	9	1	1
PF3D7_1203300	Q8I612	PFL0165c	tr|Q8I612|Q8I612_PLAF7 TBCC domain-containing protein, putative OS=Plasmodium falciparum (isolate 3D7) OX=36329 GN=PF3D7_1203300 PE=4 SV=1	1	9	992	0	19.065	8.91e-12	873	0.00452566	8.91e-12	27.2467	9	1	1
PF3D7_1205800	Q8I5Y7	PFL0290w	tr|Q8I5Y7|Q8I5Y7_PLAF7 High mobility group protein B3, putative OS=Plasmodium falciparum (isolate 3D7) OX=36329 GN=PF3D7_1205800 PE=4 SV=1	1	6	2284	0	8.5149	7.26e-19	101	0.000523587	7.26e-19	27.2159	9	1	1
PF3D7_1145800	Q8IHR0	PF11_0469	tr|Q8IHR0|Q8IHR0_PLAF7 Uncharacterized protein OS=Plasmodium falciparum (isolate 3D7) OX=36329 GN=PF3D7_1145800 PE=4 SV=1	1	6	915	0	20.339	1.07e-09	1139	0.00590461	1.07e-09	28.1159	9	1	1
PF3D7_0802600	C0H4R1	MAL8P1.150	tr|C0H4R1|C0H4R1_PLAF7 Adenylyl cyclase beta OS=Plasmodium falciparum (isolate 3D7) OX=36329 GN=PF3D7_0802600 PE=4 SV=1	1	12	2279	0	13.692	3.58e-19	85	0.000440643	3.58e-19	26.3696	9	1	1
PF3D7_1435700.2	A0A144A3H8;Q8ILA7	PF14_0338	tr|A0A144A3H8|A0A144A3H8_PLAF7 Ataxin-2 like protein, putative OS=Plasmodium falciparum (isolate 3D7) OX=36329 GN=PF3D7_1435700.2 PE=4 SV=1;tr|Q8ILA7|Q8ILA7_PLAF7 Ataxin-2 like protein, putative OS=Plasmodium falciparum (isolate 3D7) OX=36329 GN=PF3D7_1435	2	8	888	0	55.729	3.78e-12	828	0.00429238	3.78e-12	26.9877	9	1	1
PF3D7_1458800	Q8IKP3	PF14_0561	tr|Q8IKP3|Q8IKP3_PLAF7 DNA-directed RNA polymerase III subunit RPC5, putative OS=Plasmodium falciparum (isolate 3D7) OX=36329 GN=PF3D7_1458800 PE=4 SV=1	1	8	865	0	83.095	2.25e-10	1052	0.0054536	2.25e-10	27.0912	9	1	1
PF3D7_1111700	Q8IIP6	PF11_0123	tr|Q8IIP6|Q8IIP6_PLAF7 Uncharacterized protein OS=Plasmodium falciparum (isolate 3D7) OX=36329 GN=PF3D7_1111700 PE=4 SV=1	1	11	800	0	69.631	3.16e-13	700	0.00362882	3.16e-13	26.5174	9	1	1
PF3D7_0827800	Q8IBB0	PF08_0012	tr|Q8IBB0|Q8IBB0_PLAF7 SET domain protein, putative OS=Plasmodium falciparum (isolate 3D7) OX=36329 GN=PF3D7_0827800 PE=4 SV=1	1	12	2399	0	7.6036	5.17e-10	1098	0.00569207	5.17e-10	26.6929	9	1	1
PF3D7_1239000	Q8I533	PFL1890c	tr|Q8I533|Q8I533_PLAF7 HD superfamily phosphohydrolase protein, putative OS=Plasmodium falciparum (isolate 3D7) OX=36329 GN=PF3D7_1239000 PE=4 SV=2	1	6	822	0	6.7967	1.56e-07	1288	0.00667703	1.56e-07	27.5594	9	1	1
PF3D7_1218600	Q8I5M2	PFL0900c	tr|Q8I5M2|Q8I5M2_PLAF7 Arginine--tRNA ligase OS=Plasmodium falciparum (isolate 3D7) OX=36329 GN=PF3D7_1218600 PE=1 SV=1	1	9	590	0	49.6	3.47e-09	1189	0.00616381	3.47e-09	2.75934	9	1	1
PF3D7_0819600	Q8IB31	MAL8P1.62	tr|Q8IB31|Q8IB31_PLAF7 Ubiquitin-like domain-containing protein OS=Plasmodium falciparum (isolate 3D7) OX=36329 GN=PF3D7_0819600 PE=4 SV=1	1	7	277	0	192.35	3.01e-11	941	0.00487818	3.01e-11	2.74177	9	1	1
PF3D7_0206700	Q7KWJ4	ASL	tr|Q7KWJ4|Q7KWJ4_PLAF7 Adenylosuccinate lyase OS=Plasmodium falciparum (isolate 3D7) OX=36329 GN=PF3D7_0206700 PE=3 SV=1	1	9	471	0	4.0018	3e-14	552	0.00286159	3e-14	3.73668	9	1	1
PF3D7_1237500	Q8I548	PFL1815c	tr|Q8I548|Q8I548_PLAF7 Uncharacterized protein OS=Plasmodium falciparum (isolate 3D7) OX=36329 GN=PF3D7_1237500 PE=4 SV=1	1	8	1681	0	56.227	4.17e-16	313	0.0016226	4.17e-16	26.9623	9	1	1
PF3D7_0729100	C0H4Q1	PF07_0120	tr|C0H4Q1|C0H4Q1_PLAF7 Uncharacterized protein OS=Plasmodium falciparum (isolate 3D7) OX=36329 GN=PF3D7_0729100 PE=4 SV=1	1	7	2580	0	12.42	4.52e-15	431	0.00223432	4.52e-15	26.9374	9	1	1
PF3D7_0708000	C0H4M2	MAL7P1.25	tr|C0H4M2|C0H4M2_PLAF7 Cytoskeleton associated protein, putative OS=Plasmodium falciparum (isolate 3D7) OX=36329 GN=PF3D7_0708000 PE=4 SV=1	1	9	868	0	15.626	1.08e-12	764	0.0039606	1.08e-12	26.6033	9	1	1
PF3D7_1436200	Q8ILA2	PF14_0343	tr|Q8ILA2|Q8ILA2_PLAF7 Basal complex protein BCP1 OS=Plasmodium falciparum (isolate 3D7) OX=36329 GN=PF3D7_1436200 PE=4 SV=1	1	10	2269	0	22.103	9.22e-11	1006	0.00521514	9.22e-11	26.616	9	1	1
PF3D7_0529500	Q8I3H2	PFE1470w	tr|Q8I3H2|Q8I3H2_PLAF7 Cell cycle regulator protein, putative OS=Plasmodium falciparum (isolate 3D7) OX=36329 GN=PF3D7_0529500 PE=4 SV=1	1	5	179	0	7.5187	8.12e-06	1355	0.00702437	8.12e-06	27.7477	9	1	1
PF3D7_1358900	C0H5I9	MAL13P1.294	tr|C0H5I9|C0H5I9_PLAF7 GTP-binding protein, putative OS=Plasmodium falciparum (isolate 3D7) OX=36329 GN=PF3D7_1358900 PE=4 SV=1	1	9	367	0	17.538	7.16e-20	65	0.000336962	7.16e-20	26.7223	9	1	1
PF3D7_0515000	Q8I3V8	PFE0750c	tr|Q8I3V8|Q8I3V8_PLAF7 Pre-mRNA-splicing factor CWC2, putative OS=Plasmodium falciparum (isolate 3D7) OX=36329 GN=PF3D7_0515000 PE=4 SV=1	1	6	848	0	41.672	3.73e-15	423	0.00219285	3.73e-15	27.0302	9	1	1
PF3D7_0714200	Q8IBV5	PF07_0056	tr|Q8IBV5|Q8IBV5_PLAF7 Uncharacterized protein OS=Plasmodium falciparum (isolate 3D7) OX=36329 GN=PF3D7_0714200 PE=4 SV=1	1	7	1361	0	148.47	2.21e-14	536	0.00277864	2.21e-14	26.6305	9	1	1
PF3D7_1102400	Q8IIX6	PF11_0036	tr|Q8IIX6|Q8IIX6_PLAF7 Phosphopantothenate--cysteine ligase, putative OS=Plasmodium falciparum (isolate 3D7) OX=36329 GN=PF3D7_1102400 PE=4 SV=1	1	7	660	0	59.681	1.19e-15	362	0.00187662	1.19e-15	26.9914	9	1	1
PF3D7_0808400	C0H4T1	MAL8P1.121:exon:1	tr|C0H4T1|C0H4T1_PLAF7 Coatomer subunit epsilon, putative OS=Plasmodium falciparum (isolate 3D7) OX=36329 GN=PF3D7_0808400 PE=4 SV=1	1	6	278	0	4.4914	2.8e-09	1179	0.00611198	2.8e-09	3.26219	9	1	1
PF3D7_0822800	C0H4X1	MAL8P1.43	tr|C0H4X1|C0H4X1_PLAF7 U5 small nuclear ribonucleoprotein 40 kDa protein, putative OS=Plasmodium falciparum (isolate 3D7) OX=36329 GN=PF3D7_0822800 PE=4 SV=1	1	7	324	0	8.1545	1.25e-11	890	0.00461379	1.25e-11	27.037	9	1	1
PF3D7_1205400	Q8I5Z1	PFL0270c	tr|Q8I5Z1|Q8I5Z1_PLAF7 Kelch domain-containing protein, putative OS=Plasmodium falciparum (isolate 3D7) OX=36329 GN=PF3D7_1205400 PE=4 SV=1	1	6	1085	0	17.542	8.61e-15	469	0.00243131	8.61e-15	27.6955	9	1	1
PF3D7_0102200	Q8I0U6	RESA	tr|Q8I0U6|Q8I0U6_PLAF7 Ring-infected erythrocyte surface antigen OS=Plasmodium falciparum (isolate 3D7) OX=36329 GN=PF3D7_0102200 PE=4 SV=1	1	9	1085	0	12.48	6.6e-09	1216	0.00630378	6.6e-09	26.7711	9	1	1
PF3D7_0618200	C6KT22	PFF0880c	tr|C6KT22|C6KT22_PLAF7 Uncharacterized protein OS=Plasmodium falciparum (isolate 3D7) OX=36329 GN=PF3D7_0618200 PE=4 SV=1	1	4	199	0	27.457	2.98e-15	411	0.00213064	2.98e-15	3.2068	9	1	1
PF3D7_1019600	Q8IJK6	PF10_0189	tr|Q8IJK6|Q8IJK6_PLAF7 PH domain-containing protein OS=Plasmodium falciparum (isolate 3D7) OX=36329 GN=PF3D7_1019600 PE=4 SV=2	1	5	1210	0	11.921	4.08e-11	956	0.00495594	4.08e-11	27.3443	9	1	1
PF3D7_0506800	Q8I434	PFE0335w	tr|Q8I434|Q8I434_PLAF7 Transcription factor 25, putative OS=Plasmodium falciparum (isolate 3D7) OX=36329 GN=PF3D7_0506800 PE=4 SV=1	1	11	929	0	26.014	9.53e-20	69	0.000357698	9.53e-20	26.6657	9	1	1
PF3D7_0420300	Q8I1N6	PFD0985w	sp|Q8I1N6|AP2A_PLAF7 AP2/ERF domain-containing protein PFD0985w OS=Plasmodium falciparum (isolate 3D7) OX=36329 GN=PFD0985w PE=1 SV=2	1	10	3473	0	24.952	2.53e-18	124	0.00064282	2.53e-18	26.3499	9	1	1
PF3D7_0810300	C0H4T6	MAL8P1.109	tr|C0H4T6|C0H4T6_PLAF7 Protein phosphatase PPM5, putative OS=Plasmodium falciparum (isolate 3D7) OX=36329 GN=PF3D7_0810300 PE=3 SV=1	1	6	550	0	8.269	2.33e-15	399	0.00206843	2.33e-15	26.7683	9	1	1
PF3D7_0803700	Q8IAN7	g-tub	tr|Q8IAN7|Q8IAN7_PLAF7 Tubulin gamma chain OS=Plasmodium falciparum (isolate 3D7) OX=36329 GN=PF3D7_0803700 PE=3 SV=1	1	6	452	0	15.149	2.22e-11	922	0.00477968	2.22e-11	3.1198	9	1	1
PF3D7_1009200	Q8IJV3	PF10_0089	tr|Q8IJV3|Q8IJV3_PLAF7 Ribonuclease, putative OS=Plasmodium falciparum (isolate 3D7) OX=36329 GN=PF3D7_1009200 PE=4 SV=1	1	9	915	0	14.892	2.96e-16	299	0.00155003	2.96e-16	26.7223	9	1	1
PF3D7_0626700	C6KTA3	PFF1295w	tr|C6KTA3|C6KTA3_PLAF7 ATPase OS=Plasmodium falciparum (isolate 3D7) OX=36329 GN=PF3D7_0626700 PE=4 SV=1	1	8	372	0	19.235	1.91e-05	1368	0.00709176	1.91e-05	2.14621	9	1	1
PF3D7_1245100	Q8I4Y0	PFL2165w	tr|Q8I4Y0|Q8I4Y0_PLAF7 Kinesin-13, putative OS=Plasmodium falciparum (isolate 3D7) OX=36329 GN=PF3D7_1245100 PE=1 SV=2	1	8	1326	0	72.585	5.25e-20	60	0.000311042	5.25e-20	26.698	9	1	1
PF3D7_0802300	Q8IAM3	PF08_0130	tr|Q8IAM3|Q8IAM3_PLAF7 Periodic tryptophan protein 2, putative OS=Plasmodium falciparum (isolate 3D7) OX=36329 GN=PF3D7_0802300 PE=4 SV=1	1	8	1121	0	34.069	3.24e-13	702	0.00363919	3.24e-13	26.5573	9	1	1
PF3D7_1340100	A0A5K1K8M9		tr|A0A5K1K8M9|A0A5K1K8M9_PLAF7 Exosome complex component RRP42, putative OS=Plasmodium falciparum (isolate 3D7) OX=36329 GN=PF3D7_1340100 PE=4 SV=1	1	7	278	0	138.06	2.46e-09	1173	0.00608087	2.46e-09	27.233	9	1	1
PF3D7_0907400	Q8I377	PFI0355c	tr|Q8I377|Q8I377_PLAF7 ATP-dependent protease ATPase subunit ClpY OS=Plasmodium falciparum (isolate 3D7) OX=36329 GN=PF3D7_0907400 PE=4 SV=1	1	10	922	0	61.978	5.22e-14	585	0.00303266	5.22e-14	2.39014	9	1	1
PF3D7_0811000	Q8IAU5	PF08_0094	tr|Q8IAU5|Q8IAU5_PLAF7 Cullin-1, putative OS=Plasmodium falciparum (isolate 3D7) OX=36329 GN=PF3D7_0811000 PE=3 SV=2	1	9	829	0	11.624	6.11e-13	734	0.00380508	6.11e-13	26.5098	9	1	1
PF3D7_1017300.1	C6S3C8;Q8IJM6	PF10_0168	tr|C6S3C8|C6S3C8_PLAF7 Golgi re-assembly stacking protein 1 OS=Plasmodium falciparum (isolate 3D7) OX=36329 GN=PF3D7_1017300.1 PE=4 SV=1;tr|Q8IJM6|Q8IJM6_PLAF7 Golgi re-assembly stacking protein 2 OS=Plasmodium falciparum (isolate 3D7) OX=36329 GN=PF3D7_10	2	8	573	0	24.68	7.03e-07	1319	0.00683774	7.03e-07	26.8278	9	1	1
PF3D7_1343900	C0H5G7	MAL13P1.385	tr|C0H5G7|C0H5G7_PLAF7 U4/U6 small nuclear ribonucleoprotein PRP4, putative OS=Plasmodium falciparum (isolate 3D7) OX=36329 GN=PF3D7_1343900 PE=4 SV=1	1	7	648	0	23.871	2.1e-13	672	0.00348367	2.1e-13	26.8013	9	1	1
PF3D7_1305400	Q8IER1	MAL13P1.28	tr|Q8IER1|Q8IER1_PLAF7 AAR2 protein, putative OS=Plasmodium falciparum (isolate 3D7) OX=36329 GN=PF3D7_1305400 PE=4 SV=1	1	9	609	0	44.038	3.49e-14	557	0.00288751	3.49e-14	26.4593	9	1	1
PF3D7_0531400	Q8I3F4	PFE1570c	tr|Q8I3F4|Q8I3F4_PLAF7 G-patch domain-containing protein OS=Plasmodium falciparum (isolate 3D7) OX=36329 GN=PF3D7_0531400 PE=4 SV=1	1	9	1171	0	16.203	7.17e-18	155	0.000803525	7.17e-18	26.6199	9	1	1
PF3D7_1114900	Q8IIL3	PF11_0158	tr|Q8IIL3|Q8IIL3_PLAF7 Uncharacterized protein OS=Plasmodium falciparum (isolate 3D7) OX=36329 GN=PF3D7_1114900 PE=4 SV=1	1	6	2480	0	5.59	3.35e-17	214	0.00110938	3.35e-17	27.6601	9	1	1
PF3D7_1248200	A0A144A0M5;Q8I4V2	PFL2310w	tr|A0A144A0M5|A0A144A0M5_PLAF7 Pre-mRNA-splicing factor RBM22, putative OS=Plasmodium falciparum (isolate 3D7) OX=36329 GN=PF3D7_1248200 PE=4 SV=1;sp|Q8I4V2|RBM22_PLAF7 Pre-mRNA-splicing factor PFL2310w OS=Plasmodium falciparum (isolate 3D7) OX=36329 GN=PF	2	6	357	0	65.89	8.13e-18	159	0.000824261	8.13e-18	27.2801	9	1	1
PF3D7_0411800	Q9U0H2	PFD0585c	tr|Q9U0H2|Q9U0H2_PLAF7 Uncharacterized protein OS=Plasmodium falciparum (isolate 3D7) OX=36329 GN=PF3D7_0411800 PE=4 SV=1	1	13	1928	0	7.3736	3.33e-12	825	0.00427683	3.33e-12	25.8347	9	1	1
PF3D7_0105200	Q8I289	PFA_0255c	tr|Q8I289|Q8I289_PLAF7 Heptatricopeptide repeat and RAP domain-containing protein, putative OS=Plasmodium falciparum (isolate 3D7) OX=36329 GN=PF3D7_0105200 PE=4 SV=1	1	8	568	0	26.581	2.08e-17	194	0.0010057	2.08e-17	3.41863	9	1	1
PF3D7_0319900	O97279	PFC0885c	tr|O97279|O97279_PLAF7 Uncharacterized protein OS=Plasmodium falciparum (isolate 3D7) OX=36329 GN=PF3D7_0319900 PE=4 SV=1	1	4	314	0	6.1645	4.07e-13	715	0.00370658	4.07e-13	27.3326	9	1	1
PF3D7_1471400	Q8IKC5	PF14_0681	tr|Q8IKC5|Q8IKC5_PLAF7 Diacylglycerol kinase OS=Plasmodium falciparum (isolate 3D7) OX=36329 GN=PF3D7_1471400 PE=3 SV=2	1	4	499	0	16.943	1.44e-12	782	0.00405391	1.44e-12	27.6234	9	1	1
PF3D7_1216500	Q8I5P2	mdv-1	tr|Q8I5P2|Q8I5P2_PLAF7 Male development gene 1 OS=Plasmodium falciparum (isolate 3D7) OX=36329 GN=PF3D7_1216500 PE=4 SV=1	1	5	221	0	12.353	0.000392815	1401	0.00726283	0.000392815	1.84836	9	1	1
PF3D7_1119000	Q8IIH7	PF11_0197	tr|Q8IIH7|Q8IIH7_PLAF7 Acyl-CoA-binding protein, putative OS=Plasmodium falciparum (isolate 3D7) OX=36329 GN=PF3D7_1119000 PE=4 SV=1	1	6	371	0	7.0661	4.11e-13	716	0.00371177	4.11e-13	26.9248	9	1	1
PF3D7_0909400	Q8I358	PFI0455w	tr|Q8I358|Q8I358_PLAF7 Exoribonuclease, putative OS=Plasmodium falciparum (isolate 3D7) OX=36329 GN=PF3D7_0909400 PE=4 SV=1	1	11	1311	0	16.287	1.17e-16	259	0.00134267	1.17e-16	26.4064	9	1	1
PF3D7_1230800	Q8I5B2	PFL1485w	tr|Q8I5B2|Q8I5B2_PLAF7 Pre-mRNA-splicing regulator, putative OS=Plasmodium falciparum (isolate 3D7) OX=36329 GN=PF3D7_1230800 PE=4 SV=2	1	8	584	0	96.723	8.59e-14	624	0.00323484	8.59e-14	26.8124	9	1	1
PF3D7_0904100	Q8I3A8	PFI0200c	tr|Q8I3A8|Q8I3A8_PLAF7 AP-4 complex subunit epsilon, putative OS=Plasmodium falciparum (isolate 3D7) OX=36329 GN=PF3D7_0904100 PE=4 SV=2	1	11	1388	0	101.86	2.69e-19	80	0.000414723	2.69e-19	26.5885	9	1	1
PF3D7_1141800	Q8IHU7	PF11_0429	tr|Q8IHU7|Q8IHU7_PLAF7 EELM2 domain-containing protein, putative OS=Plasmodium falciparum (isolate 3D7) OX=36329 GN=PF3D7_1141800 PE=4 SV=2	1	6	394	0	33.398	1.36e-15	371	0.00192328	1.36e-15	26.9456	9	1	1
PF3D7_0305700	O97241	PFC0255c	tr|O97241|O97241_PLAF7 Ubiquitin-conjugating enzyme E2, putative OS=Plasmodium falciparum (isolate 3D7) OX=36329 GN=PF3D7_0305700 PE=1 SV=1	1	4	142	0	4.4944	1.84e-05	1367	0.00708657	1.84e-05	1.7705	9	1	1
PF3D7_1357500	Q8IDD0	PF13_0308	tr|Q8IDD0|Q8IDD0_PLAF7 DNA helicase, putative OS=Plasmodium falciparum (isolate 3D7) OX=36329 GN=PF3D7_1357500 PE=4 SV=1	1	8	906	0	18.559	2.96e-18	130	0.000673924	2.96e-18	26.3692	9	1	1
PF3D7_1007200	Q8IJX0	PF10_0071	tr|Q8IJX0|Q8IJX0_PLAF7 Rho GTPase-activating protein, putative OS=Plasmodium falciparum (isolate 3D7) OX=36329 GN=PF3D7_1007200 PE=4 SV=2	1	5	593	0	26.183	3.62e-10	1077	0.0055832	3.62e-10	27.2347	9	1	1
PF3D7_1432700	A0A144A3E6		tr|A0A144A3E6|A0A144A3E6_PLAF7 Protein-L-isoaspartate(D-aspartate) O-methyltransferase, putative OS=Plasmodium falciparum (isolate 3D7) OX=36329 GN=PF3D7_1432700 PE=4 SV=1	1	5	224	0	27.427	3.84e-19	86	0.000445827	3.84e-19	26.5256	9	1	1
PF3D7_1002400.2	A0A143ZX28;Q8IK12	PF10_0028	tr|A0A143ZX28|A0A143ZX28_PLAF7 Transformer-2 protein homolog beta, putative OS=Plasmodium falciparum (isolate 3D7) OX=36329 GN=PF3D7_1002400.2 PE=4 SV=1;tr|Q8IK12|Q8IK12_PLAF7 Transformer-2 protein homolog beta, putative OS=Plasmodium falciparum (isolate 3	2	5	246	0	71.464	0.000909935	1413	0.00732504	0.000909935	1.80945	9	1	1
PF3D7_1325000	Q8IE68	PF13_0142	tr|Q8IE68|Q8IE68_PLAF7 U6 snRNA-associated Sm-like protein LSm6, putative OS=Plasmodium falciparum (isolate 3D7) OX=36329 GN=PF3D7_1325000 PE=3 SV=1	1	5	77	0	85.265	2.17e-09	1168	0.00605495	2.17e-09	27.365	9	1	1
PF3D7_1401800	Q8IM71	PF14_0020	tr|Q8IM71|Q8IM71_PLAF7 Choline kinase OS=Plasmodium falciparum (isolate 3D7) OX=36329 GN=PF3D7_1401800 PE=1 SV=1	1	7	440	0	26.315	4.2e-17	220	0.00114049	4.2e-17	3.48209	9	1	1
PF3D7_0317800	O77379	PFC0785c	tr|O77379|O77379_PLAF7 26S proteasome non-ATPase regulatory subunit 9, putative OS=Plasmodium falciparum (isolate 3D7) OX=36329 GN=PF3D7_0317800 PE=4 SV=1	1	7	225	0	10.078	7.58e-14	615	0.00318818	7.58e-14	4.19063	9	1	1
PF3D7_0906100	Q8I388	PFI0300w	tr|Q8I388|Q8I388_PLAF7 Vacuolar protein sorting-associated protein 46, putative OS=Plasmodium falciparum (isolate 3D7) OX=36329 GN=PF3D7_0906100 PE=4 SV=1	1	4	195	0	6.3683	4.05e-21	38	0.000196993	4.05e-21	27.3449	9	1	1
PF3D7_0515300	Q8I3V5	PFE0765w	tr|Q8I3V5|Q8I3V5_PLAF7 Phosphatidylinositol 3-kinase OS=Plasmodium falciparum (isolate 3D7) OX=36329 GN=PF3D7_0515300 PE=1 SV=1	1	9	2133	0	22.981	7.62e-17	242	0.00125454	7.62e-17	26.5533	9	1	1
PF3D7_0508500	Q8I418	RCC1	tr|Q8I418|Q8I418_PLAF7 Guanidine nucleotide exchange factor OS=Plasmodium falciparum (isolate 3D7) OX=36329 GN=PF3D7_0508500 PE=4 SV=1	1	8	2606	0	6.7744	1.93e-12	795	0.00412131	1.93e-12	26.9249	9	1	1
PF3D7_1411300	Q8ILY2	PF14_0111	tr|Q8ILY2|Q8ILY2_PLAF7 DnaJ protein, putative OS=Plasmodium falciparum (isolate 3D7) OX=36329 GN=PF3D7_1411300 PE=4 SV=2	1	4	568	0	36.178	4.55e-10	1092	0.00566096	4.55e-10	27.2131	9	1	1
PF3D7_1404000	Q8IM54	PF14_0037	tr|Q8IM54|Q8IM54_PLAF7 DNA-directed RNA polymerase II subunit RPB4, putative OS=Plasmodium falciparum (isolate 3D7) OX=36329 GN=PF3D7_1404000 PE=4 SV=1	1	5	165	0	1.7673	6.98e-10	1116	0.00578538	6.98e-10	27.2536	9	1	1
PF3D7_0308000	O77321	PFC0340w	tr|O77321|O77321_PLAF7 DNA polymerase delta small subunit, putative OS=Plasmodium falciparum (isolate 3D7) OX=36329 GN=PF3D7_0308000 PE=4 SV=1	1	5	498	0	7.1375	4.11e-12	832	0.00431312	4.11e-12	3.94172	9	1	1
PF3D7_0804800	Q8I6S4	PfCyP24	tr|Q8I6S4|Q8I6S4_PLAF7 Peptidyl-prolyl cis-trans isomerase OS=Plasmodium falciparum (isolate 3D7) OX=36329 GN=PF3D7_0804800 PE=3 SV=1	1	3	217	0	7.879	9.24e-14	633	0.00328149	9.24e-14	27.1363	9	1	1
PF3D7_0920400	Q8I2U9	PFI1000w	tr|Q8I2U9|Q8I2U9_PLAF7 Uncharacterized protein OS=Plasmodium falciparum (isolate 3D7) OX=36329 GN=PF3D7_0920400 PE=4 SV=1	1	9	1852	0	21.453	8.76e-12	869	0.00450492	8.76e-12	26.6171	9	1	1
PF3D7_1321700	Q8IE99	MAL13P1.120	tr|Q8IE99|Q8IE99_PLAF7 Splicing factor 1 OS=Plasmodium falciparum (isolate 3D7) OX=36329 GN=PF3D7_1321700 PE=4 SV=1	1	8	864	0	55.36	2.84e-10	1066	0.00552618	2.84e-10	26.5651	9	1	1
PF3D7_1433300	Q8ILD0	PF14_0314	tr|Q8ILD0|Q8ILD0_PLAF7 Chromatin assembly factor 1 P55 subunit, putative OS=Plasmodium falciparum (isolate 3D7) OX=36329 GN=PF3D7_1433300 PE=4 SV=2	1	3	428	0	8.1104	1.34e-12	776	0.00402281	1.34e-12	27.4442	9	1	1
PF3D7_0107000.1	Q8I272	PfCEN1	tr|Q8I272|Q8I272_PLAF7 Centrin-1 OS=Plasmodium falciparum (isolate 3D7) OX=36329 GN=PF3D7_0107000.1 PE=4 SV=1	1	6	168	0	53.253	6.93e-12	857	0.00444272	6.93e-12	2.05033	9	1	1
PF3D7_1229800	A0A144A488		tr|A0A144A488|A0A144A488_PLAF7 Myosin J, putative OS=Plasmodium falciparum (isolate 3D7) OX=36329 GN=PF3D7_1229800 PE=3 SV=1	1	9	2274	0	0.99098	2.57e-08	1255	0.00650596	2.57e-08	26.0768	9	1	1
PF3D7_0617000	C6KT11	PFF0825c	tr|C6KT11|C6KT11_PLAF7 Mitochondrial import receptor subunit TOM40, putative OS=Plasmodium falciparum (isolate 3D7) OX=36329 GN=PF3D7_0617000 PE=4 SV=1	1	5	377	0	11.941	5.43e-13	726	0.00376361	5.43e-13	2.81341	9	1	1
PF3D7_0303300	O77315	PFC0155c	tr|O77315|O77315_PLAF7 DNA-directed RNA polymerases I, II, and III subunit RPABC2, putative OS=Plasmodium falciparum (isolate 3D7) OX=36329 GN=PF3D7_0303300 PE=4 SV=2	1	5	153	0	93.331	6.32e-11	984	0.00510109	6.32e-11	28.2653	9	1	1
PF3D7_1438600	Q8IL82	PF14_0365	tr|Q8IL82|Q8IL82_PLAF7 Uncharacterized protein OS=Plasmodium falciparum (isolate 3D7) OX=36329 GN=PF3D7_1438600 PE=4 SV=1	1	5	277	0	0.86668	3.29e-17	212	0.00109902	3.29e-17	26.5307	9	1	1
PF3D7_1133200	Q8II32	PF11_0342	tr|Q8II32|Q8II32_PLAF7 Uncharacterized protein OS=Plasmodium falciparum (isolate 3D7) OX=36329 GN=PF3D7_1133200 PE=4 SV=1	1	10	2072	0	6.3809	3.08e-19	84	0.000435459	3.08e-19	26.2679	9	1	1
PF3D7_1215300	Q8I5Q3	Cpn10	tr|Q8I5Q3|Q8I5Q3_PLAF7 10 kDa chaperonin OS=Plasmodium falciparum (isolate 3D7) OX=36329 GN=PF3D7_1215300 PE=3 SV=2	1	5	103	0	25.615	0.000258653	1397	0.00724209	0.000258653	1.79878	9	1	1
PF3D7_1422400	Q8ILM9	PF14_0214	tr|Q8ILM9|Q8ILM9_PLAF7 Uncharacterized protein OS=Plasmodium falciparum (isolate 3D7) OX=36329 GN=PF3D7_1422400 PE=4 SV=1	1	14	1630	0	26.331	4.08e-14	571	0.00296008	4.08e-14	26.0756	9	1	1
PF3D7_1213600	Q8I5R9	PFL0660w	tr|Q8I5R9|Q8I5R9_PLAF7 Dynein light chain OS=Plasmodium falciparum (isolate 3D7) OX=36329 GN=PF3D7_1213600 PE=1 SV=1	1	3	93	0	298.51	7.48e-10	1121	0.0058113	7.48e-10	27.0689	9	1	1
PF3D7_1328500	A0A5K1K859		tr|A0A5K1K859|A0A5K1K859_PLAF7 Alpha/beta-hydrolase, putative OS=Plasmodium falciparum (isolate 3D7) OX=36329 GN=PF3D7_1328500 PE=4 SV=1	1	6	1004	0	91.355	6.21e-12	850	0.00440643	6.21e-12	26.9055	9	1	1
PF3D7_0409300	Q9U0J3	PFD0460c	tr|Q9U0J3|Q9U0J3_PLAF7 Methyltransferase, putative OS=Plasmodium falciparum (isolate 3D7) OX=36329 GN=PF3D7_0409300 PE=4 SV=2	1	7	1010	0	41.313	1.84e-11	912	0.00472784	1.84e-11	26.7827	9	1	1
PF3D7_1449500	Q8IKY0	ApiAP2	tr|Q8IKY0|Q8IKY0_PLAF7 AP2 domain transcription factor AP2-O5, putative OS=Plasmodium falciparum (isolate 3D7) OX=36329 GN=PF3D7_1449500 PE=4 SV=1	1	5	715	0	21.224	6.54e-06	1348	0.00698808	6.54e-06	27.367	9	1	1
PF3D7_1239900	Q8I524	PFL1935c	tr|Q8I524|Q8I524_PLAF7 Vacuolar protein sorting-associated protein 16, putative OS=Plasmodium falciparum (isolate 3D7) OX=36329 GN=PF3D7_1239900 PE=4 SV=1	1	12	1032	0	71.068	1.69e-17	185	0.000959046	1.69e-17	26.6661	9	1	1
PF3D7_1368400	Q8ID26	PF13_0356	tr|Q8ID26|Q8ID26_PLAF7 Ribosomal protein L1, putative OS=Plasmodium falciparum (isolate 3D7) OX=36329 GN=PF3D7_1368400 PE=4 SV=1	1	6	320	0	21.024	1.52e-16	275	0.00142561	1.52e-16	26.9795	9	1	1
PF3D7_1035500	Q8IJ54	PF10_0346	tr|Q8IJ54|Q8IJ54_PLAF7 Merozoite surface protein 6 OS=Plasmodium falciparum (isolate 3D7) OX=36329 GN=PF3D7_1035500 PE=4 SV=1	1	4	371	0	20.898	0.00293726	1420	0.00736133	0.00293726	2.19561	9	1	1
PF3D7_0216200	O96240	PFB0735c	tr|O96240|O96240_PLAF7 Alba domain-containing protein OS=Plasmodium falciparum (isolate 3D7) OX=36329 GN=PF3D7_0216200 PE=4 SV=3	1	5	227	0	14.049	7.34e-06	1351	0.00700363	7.34e-06	27.0076	9	1	1
PF3D7_1439100	Q8IL78	PF14_0370	tr|Q8IL78|Q8IL78_PLAF7 DEAD/DEAH box helicase, putative OS=Plasmodium falciparum (isolate 3D7) OX=36329 GN=PF3D7_1439100 PE=4 SV=1	1	6	2472	0	12.389	1.94e-12	796	0.00412649	1.94e-12	27.9044	9	1	1
PF3D7_0524400	A0A5K1K870		tr|A0A5K1K870|A0A5K1K870_PLAF7 Ribosome-interacting GTPase 1, putative OS=Plasmodium falciparum (isolate 3D7) OX=36329 GN=PF3D7_0524400 PE=4 SV=1	1	6	365	0	1.9814	8.53e-14	623	0.00322965	8.53e-14	26.6553	9	1	1
PF3D7_0616800	C6KT09	PFF0815w	tr|C6KT09|C6KT09_PLAF7 Malate:quinone oxidoreductase OS=Plasmodium falciparum (isolate 3D7) OX=36329 GN=PF3D7_0616800 PE=4 SV=1	1	5	521	0	0.72669	1.41e-10	1026	0.00531882	1.41e-10	3.79178	9	1	1
PF3D7_0810500	Q8IAU0	MAL8P1.108	tr|Q8IAU0|Q8IAU0_PLAF7 Protein phosphatase PPM7, putative OS=Plasmodium falciparum (isolate 3D7) OX=36329 GN=PF3D7_0810500 PE=4 SV=1	1	5	303	0	4.6691	2.29e-12	807	0.00418351	2.29e-12	26.5076	9	1	1
PF3D7_0926100	Q8I2P8	PFI1280c	tr|Q8I2P8|Q8I2P8_PLAF7 Protein kinase, putative OS=Plasmodium falciparum (isolate 3D7) OX=36329 GN=PF3D7_0926100 PE=4 SV=1	1	6	3178	0	15.117	1.31e-10	1020	0.00528771	1.31e-10	27.0099	9	1	1
PF3D7_0208100.1	O96168	PFB0365w	tr|O96168|O96168_PLAF7 Uncharacterized protein OS=Plasmodium falciparum (isolate 3D7) OX=36329 GN=PF3D7_0208100.1 PE=4 SV=3	1	9	1789	0	32.286	6.25e-22	19	9.85e-05	6.25e-22	26.4515	9	1	1
PF3D7_0520300	Q8I3Q7	PFE1020w	tr|Q8I3Q7|Q8I3Q7_PLAF7 U6 snRNA-associated Sm-like protein LSm2 OS=Plasmodium falciparum (isolate 3D7) OX=36329 GN=PF3D7_0520300 PE=3 SV=1	1	3	103	0	7.9946	1.24e-08	1233	0.00639191	1.24e-08	27.8688	9	1	1
PF3D7_1475000	Q8IK88	PF14_0718	tr|Q8IK88|Q8IK88_PLAF7 Mediator of RNA polymerase II transcription subunit 31 OS=Plasmodium falciparum (isolate 3D7) OX=36329 GN=PF3D7_1475000 PE=3 SV=1	1	2	132	0	4.5552	4.76e-08	1266	0.00656299	4.76e-08	27.9115	9	1	1
PF3D7_0525500	A0A5K1K8K0		tr|A0A5K1K8K0|A0A5K1K8K0_PLAF7 WD repeat-containing protein, putative OS=Plasmodium falciparum (isolate 3D7) OX=36329 GN=PF3D7_0525500 PE=4 SV=1	1	6	1863	0	9.3169	6.63e-14	607	0.00314671	6.63e-14	27.0074	9	1	1
PF3D7_1415400	Q8ILU2	PF14_0152	tr|Q8ILU2|Q8ILU2_PLAF7 Btz domain-containing protein OS=Plasmodium falciparum (isolate 3D7) OX=36329 GN=PF3D7_1415400 PE=4 SV=1	1	3	1474	0	101.36	3.25e-11	944	0.00489373	3.25e-11	27.3049	9	1	1
PF3D7_1022600	Q8IJH9	PF10_0219	tr|Q8IJH9|Q8IJH9_PLAF7 Kelch protein K10 OS=Plasmodium falciparum (isolate 3D7) OX=36329 GN=PF3D7_1022600 PE=4 SV=1	1	8	891	0	5.4102	2.41e-11	928	0.00481078	2.41e-11	26.4969	9	1	1
PF3D7_0903600.1	A0A143ZVB6		tr|A0A143ZVB6|A0A143ZVB6_PLAF7 Uncharacterized protein OS=Plasmodium falciparum (isolate 3D7) OX=36329 GN=PF3D7_0903600.1 PE=4 SV=1	1	9	760	0	18.642	1.38e-07	1287	0.00667185	1.38e-07	26.5736	9	1	1
PF3D7_1248700	Q8I4U7	PFL2335w	tr|Q8I4U7|Q8I4U7_PLAF7 Uncharacterized protein OS=Plasmodium falciparum (isolate 3D7) OX=36329 GN=PF3D7_1248700 PE=4 SV=1	1	6	1989	0	38.966	8.97e-14	628	0.00325557	8.97e-14	26.4768	9	1	1
PF3D7_0707600	Q8IC13	PF07_0025	tr|Q8IC13|Q8IC13_PLAF7 Mediator of RNA polymerase II transcription subunit 10, putative OS=Plasmodium falciparum (isolate 3D7) OX=36329 GN=PF3D7_0707600 PE=4 SV=1	1	5	244	0	35.804	6.18e-09	1213	0.00628823	6.18e-09	27.2533	9	1	1
PF3D7_0611800	C6KSW2	PFF0575c	tr|C6KSW2|C6KSW2_PLAF7 Uncharacterized protein OS=Plasmodium falciparum (isolate 3D7) OX=36329 GN=PF3D7_0611800 PE=4 SV=1	1	8	3248	0	37.015	1.24e-10	1019	0.00528253	1.24e-10	26.3511	9	1	1
PF3D7_1438500	Q8IL83	PF14_0364	tr|Q8IL83|Q8IL83_PLAF7 Cleavage and polyadenylation specificity factor subunit 3, putative OS=Plasmodium falciparum (isolate 3D7) OX=36329 GN=PF3D7_1438500 PE=4 SV=1	1	8	876	0	16.799	5.13e-14	583	0.00302229	5.13e-14	26.4095	9	1	1
PF3D7_0820200	Q8IB37	PfPGPS	tr|Q8IB37|Q8IB37_PLAF7 CDP-diacylglycerol--glycerol-3-phosphate 3-phosphatidyltransferase OS=Plasmodium falciparum (isolate 3D7) OX=36329 GN=PF3D7_0820200 PE=3 SV=1	1	9	661	0	20.729	8.05e-15	465	0.00241057	8.05e-15	26.053	9	1	1
PF3D7_1431100	Q8ILF4	PF14_0290	tr|Q8ILF4|Q8ILF4_PLAF7 PhIL1 interacting protein PIP2 OS=Plasmodium falciparum (isolate 3D7) OX=36329 GN=PF3D7_1431100 PE=4 SV=1	1	6	347	0	21.224	1.07e-12	763	0.00395542	1.07e-12	26.7446	9	1	1
PF3D7_0602100	C6KSM1	PFF0100w	tr|C6KSM1|C6KSM1_PLAF7 ATP-dependent RNA helicase, putative OS=Plasmodium falciparum (isolate 3D7) OX=36329 GN=PF3D7_0602100 PE=4 SV=1	1	7	1350	0	19.781	2.02e-15	388	0.0020114	2.02e-15	26.3179	9	1	1
PF3D7_0818700	C0H4V8	MAL8P1.65	tr|C0H4V8|C0H4V8_PLAF7 DNA helicase, putative OS=Plasmodium falciparum (isolate 3D7) OX=36329 GN=PF3D7_0818700 PE=4 SV=2	1	9	1223	0	32.42	5.14e-16	322	0.00166926	5.14e-16	26.4722	9	1	1
PF3D7_1220100	Q8I5L1	PFL0970w	tr|Q8I5L1|Q8I5L1_PLAF7 Pre-mRNA-processing factor 17, putative OS=Plasmodium falciparum (isolate 3D7) OX=36329 GN=PF3D7_1220100 PE=4 SV=1	1	9	618	0	93.938	3.91e-12	831	0.00430793	3.91e-12	26.326	9	1	1
PF3D7_1110200	Q8IIR0	PF11_0108	tr|Q8IIR0|Q8IIR0_PLAF7 Pre-mRNA-processing factor 6, putative OS=Plasmodium falciparum (isolate 3D7) OX=36329 GN=PF3D7_1110200 PE=4 SV=1	1	7	1329	0	5.6719	6.39e-19	98	0.000508035	6.39e-19	26.4124	9	1	1
PF3D7_1103600	Q8IIW6	PF11_0047	tr|Q8IIW6|Q8IIW6_PLAF7 Actin-like protein, putative OS=Plasmodium falciparum (isolate 3D7) OX=36329 GN=PF3D7_1103600 PE=3 SV=1	1	5	499	0	4.3559	2.47e-10	1059	0.00548989	2.47e-10	26.8869	9	1	1
PF3D7_1324700	C0H5D3	PfYkt6.2	tr|C0H5D3|C0H5D3_PLAF7 SNARE protein, putative OS=Plasmodium falciparum (isolate 3D7) OX=36329 GN=PF3D7_1324700 PE=3 SV=1	1	4	221	0	17.092	5.25e-11	975	0.00505443	5.25e-11	26.9916	9	1	1
PF3D7_0507600	Q8I427	PFE0375w	tr|Q8I427|Q8I427_PLAF7 Protein CAF40, putative OS=Plasmodium falciparum (isolate 3D7) OX=36329 GN=PF3D7_0507600 PE=4 SV=1	1	7	652	0	69.799	3.57e-09	1192	0.00617937	3.57e-09	26.5368	9	1	1
PF3D7_1416200	Q8ILT4	PF14_0160	tr|Q8ILT4|Q8ILT4_PLAF7 Metacaspase-3, putative OS=Plasmodium falciparum (isolate 3D7) OX=36329 GN=PF3D7_1416200 PE=4 SV=1	1	5	2280	0	6.361	1.87e-11	913	0.00473302	1.87e-11	26.805	9	1	1
PF3D7_1027700.1	Q8IJC7;A0A143ZXT2	PF10_0271	tr|Q8IJC7|Q8IJC7_PLAF7 Centrin-3 OS=Plasmodium falciparum (isolate 3D7) OX=36329 GN=PF3D7_1027700.1 PE=4 SV=2;tr|A0A143ZXT2|A0A143ZXT2_PLAF7 Centrin-3 OS=Plasmodium falciparum (isolate 3D7) OX=36329 GN=PF3D7_1027700.2 PE=4 SV=1	2	4	179	0	12.294	8.11e-10	1127	0.00584241	8.11e-10	26.7869	9	1	1
PF3D7_1423800	Q8ILL4	PF14_0229	tr|Q8ILL4|Q8ILL4_PLAF7 Vacuolar protein sorting-associated protein 3, putative OS=Plasmodium falciparum (isolate 3D7) OX=36329 GN=PF3D7_1423800 PE=4 SV=2	1	10	1468	0	10.533	6.96e-10	1115	0.0057802	6.96e-10	26.3141	9	1	1
PF3D7_1325200	Q8IE66	malate dehydrogenase	tr|Q8IE66|Q8IE66_PLAF7 Lactate dehydrogenase, putative OS=Plasmodium falciparum (isolate 3D7) OX=36329 GN=PF3D7_1325200 PE=3 SV=1	1	5	334	0	5.2399	3.1e-09	1184	0.00613789	3.1e-09	1.89111	9	1	1
PF3D7_0807900	Q8IAR7	MAL8P1.125	tr|Q8IAR7|Q8IAR7_PLAF7 Tyrosine--tRNA ligase OS=Plasmodium falciparum (isolate 3D7) OX=36329 GN=PF3D7_0807900 PE=1 SV=1	1	8	373	0	38.249	2.45e-10	1058	0.00548471	2.45e-10	2.69852	9	1	1
PF3D7_1425900	Q8ILK4	PF14_0239	tr|Q8ILK4|Q8ILK4_PLAF7 DUF383 domain-containing protein OS=Plasmodium falciparum (isolate 3D7) OX=36329 GN=PF3D7_1425900 PE=4 SV=2	1	4	368	0	10.542	7.48e-19	103	0.000533955	7.48e-19	26.6885	9	1	1
PF3D7_1113700	Q8IIM5	PF11_0145	tr|Q8IIM5|Q8IIM5_PLAF7 Glyoxalase I OS=Plasmodium falciparum (isolate 3D7) OX=36329 GN=PF3D7_1113700 PE=4 SV=1	1	5	356	0	16.716	1.05e-14	482	0.0024987	1.05e-14	26.7319	9	1	1
PF3D7_1332800	Q8IE00	EIF6	tr|Q8IE00|Q8IE00_PLAF7 Eukaryotic translation initiation factor 6 OS=Plasmodium falciparum (isolate 3D7) OX=36329 GN=EIF6 PE=3 SV=1	1	4	247	0	74.686	1.02e-12	760	0.00393986	1.02e-12	27.1034	9	1	1
PF3D7_1431300	Q8ILF2	PF14_0292	tr|Q8ILF2|Q8ILF2_PLAF7 Large subunit GTPase 1, putative OS=Plasmodium falciparum (isolate 3D7) OX=36329 GN=PF3D7_1431300 PE=4 SV=1	1	10	833	0	11.52	7.57e-12	859	0.00445308	7.57e-12	26.1837	9	1	1
PF3D7_0725300	Q8IBJ8	PF07_0106	tr|Q8IBJ8|Q8IBJ8_PLAF7 Uncharacterized protein OS=Plasmodium falciparum (isolate 3D7) OX=36329 GN=PF3D7_0725300 PE=4 SV=1	1	7	793	0	8.5802	2.02e-07	1295	0.00671332	2.02e-07	26.487	9	1	1
PF3D7_0921000.1	Q8I2U3;A0A143ZY34	PFI1030c	tr|Q8I2U3|Q8I2U3_PLAF7 Ubiquitin-conjugating enzyme E2, putative OS=Plasmodium falciparum (isolate 3D7) OX=36329 GN=PF3D7_0921000.1 PE=3 SV=1;tr|A0A143ZY34|A0A143ZY34_PLAF7 Ubiquitin-conjugating enzyme E2, putative OS=Plasmodium falciparum (isolate 3D7) OX	2	4	163	0	13.121	2.72e-12	816	0.00423017	2.72e-12	2.50359	9	1	1
PF3D7_0103100	Q8I2A9	PFA_0155c	tr|Q8I2A9|Q8I2A9_PLAF7 Vacuolar protein sorting-associated protein 51, putative OS=Plasmodium falciparum (isolate 3D7) OX=36329 GN=PF3D7_0103100 PE=4 SV=1	1	8	1634	0	7.9529	1.03e-12	762	0.00395023	1.03e-12	26.2211	9	1	1
PF3D7_1463300	Q8IKK3	PF14_0602	tr|Q8IKK3|Q8IKK3_PLAF7 DNA polymerase alpha subunit B, putative OS=Plasmodium falciparum (isolate 3D7) OX=36329 GN=PF3D7_1463300 PE=4 SV=1	1	6	539	0	26.541	5.3e-15	436	0.00226024	5.3e-15	26.3188	9	1	1
PF3D7_1123900	Q8IIC4	PF11_0250	tr|Q8IIC4|Q8IIC4_PLAF7 Ribonucloprotein OS=Plasmodium falciparum (isolate 3D7) OX=36329 GN=PF3D7_1123900 PE=3 SV=1	1	3	145	0	8.5998	1.18e-06	1326	0.00687403	1.18e-06	27.1899	9	1	1
PF3D7_0931400	C0H579	PFI1525w	tr|C0H579|C0H579_PLAF7 PUB domain-containing protein, putative OS=Plasmodium falciparum (isolate 3D7) OX=36329 GN=PF3D7_0931400 PE=4 SV=1	1	6	310	0	21.882	1.54e-09	1154	0.00598237	1.54e-09	3.07582	9	1	1
PF3D7_0714500	Q8IBV2	PF07_0057	tr|Q8IBV2|Q8IBV2_PLAF7 Transcription elongation factor s-II, putative OS=Plasmodium falciparum (isolate 3D7) OX=36329 GN=PF3D7_0714500 PE=4 SV=1	1	8	403	0	17.849	2.15e-10	1048	0.00543287	2.15e-10	3.74295	9	1	1
PF3D7_0215400	O96233	PFB0700c	tr|O96233|O96233_PLAF7 Uncharacterized protein OS=Plasmodium falciparum (isolate 3D7) OX=36329 GN=PF3D7_0215400 PE=4 SV=1	1	6	972	0	10.251	1.23e-12	772	0.00400207	1.23e-12	26.2935	9	1	1
PF3D7_0205400	O96149	PFB0240w	tr|O96149|O96149_PLAF7 PCI domain-containing protein, putative OS=Plasmodium falciparum (isolate 3D7) OX=36329 GN=PF3D7_0205400 PE=4 SV=2	1	5	457	0	14.951	5.23e-14	586	0.00303784	5.23e-14	3.6072	9	1	1
PF3D7_1343700	Q8IDQ2	PF13_0238	tr|Q8IDQ2|Q8IDQ2_PLAF7 Kelch protein K13 OS=Plasmodium falciparum (isolate 3D7) OX=36329 GN=PF3D7_1343700 PE=1 SV=1	1	6	726	0	36.055	3.78e-13	712	0.00369103	3.78e-13	26.3334	9	1	1
PF3D7_0514900	Q8I3V9	PFE0745w	tr|Q8I3V9|Q8I3V9_PLAF7 Uncharacterized protein OS=Plasmodium falciparum (isolate 3D7) OX=36329 GN=PF3D7_0514900 PE=4 SV=1	1	6	438	0	21.034	9.09e-17	251	0.00130119	9.09e-17	26.6934	9	1	1
PF3D7_1110700	A0A143ZXR3		tr|A0A143ZXR3|A0A143ZXR3_PLAF7 Actin-like protein, putative OS=Plasmodium falciparum (isolate 3D7) OX=36329 GN=PF3D7_1110700 PE=3 SV=1	1	5	378	0	39.823	2.01e-13	668	0.00346293	2.01e-13	2.95534	9	1	1
PF3D7_1428900	Q8ILH5	PF14_0268	tr|Q8ILH5|Q8ILH5_PLAF7 Uncharacterized protein OS=Plasmodium falciparum (isolate 3D7) OX=36329 GN=PF3D7_1428900 PE=4 SV=2	1	6	1445	0	28.334	3.46e-10	1073	0.00556247	3.46e-10	26.6842	9	1	1
PF3D7_1231600	Q8I5A4	PFL1525c	tr|Q8I5A4|Q8I5A4_PLAF7 Pre-mRNA-splicing factor ATP-dependent RNA helicase PRP2, putative OS=Plasmodium falciparum (isolate 3D7) OX=36329 GN=PF3D7_1231600 PE=4 SV=1	1	8	1168	0	32.165	9.68e-16	351	0.0018196	9.68e-16	26.1161	9	1	1
PF3D7_1315700	Q8IEF7	PF13_0087	tr|Q8IEF7|Q8IEF7_PLAF7 tRNA (adenine(58)-N(1))-methyltransferase OS=Plasmodium falciparum (isolate 3D7) OX=36329 GN=PF3D7_1315700 PE=3 SV=1	1	5	316	0	11.338	1.24e-07	1285	0.00666148	1.24e-07	26.8921	9	1	1
PF3D7_1317000	Q8I6Z8	PF13_0096	tr|Q8I6Z8|Q8I6Z8_PLAF7 U4/U6.U5 tri-snRNP-associated protein 2, putative OS=Plasmodium falciparum (isolate 3D7) OX=36329 GN=PF3D7_1317000 PE=4 SV=1	1	10	640	0	3.7802	6.64e-18	153	0.000793157	6.64e-18	26.5061	9	1	1
PF3D7_1412800	A0A144A366;Q8ILW6	PF14_0127	tr|A0A144A366|A0A144A366_PLAF7 Glycylpeptide N-tetradecanoyltransferase OS=Plasmodium falciparum (isolate 3D7) OX=36329 GN=PF3D7_1412800 PE=3 SV=1;sp|Q8ILW6|NMT_PLAF7 Glycylpeptide N-tetradecanoyltransferase OS=Plasmodium falciparum (isolate 3D7) OX=36329	2	6	410	0	75.478	6.21e-16	335	0.00173665	6.21e-16	26.3307	9	1	1
PF3D7_0303700	O97227	PFC0170c	tr|O97227|O97227_PLAF7 Dihydrolipoamide acetyltransferase component of pyruvate dehydrogenase complex OS=Plasmodium falciparum (isolate 3D7) OX=36329 GN=PF3D7_0303700 PE=3 SV=1	1	4	448	0	16.483	7.52e-10	1124	0.00582685	7.52e-10	26.7051	9	1	1
PF3D7_1317300	A0A5K1K8R1		tr|A0A5K1K8R1|A0A5K1K8R1_PLAF7 Uncharacterized protein OS=Plasmodium falciparum (isolate 3D7) OX=36329 GN=PF3D7_1317300 PE=4 SV=1	1	4	296	0	26.946	1.64e-08	1244	0.00644894	1.64e-08	26.8109	9	1	1
PF3D7_1447800	Q8IKZ7	PF14_0454	tr|Q8IKZ7|Q8IKZ7_PLAF7 Calponin homology domain-containing protein, putative OS=Plasmodium falciparum (isolate 3D7) OX=36329 GN=PF3D7_1447800 PE=4 SV=1	1	9	1986	0	13.133	2.87e-10	1067	0.00553136	2.87e-10	25.9529	9	1	1
PF3D7_0110600	Q8I239	NCS	tr|Q8I239|Q8I239_PLAF7 Phosphatidylinositol-4-phosphate 5-kinase OS=Plasmodium falciparum (isolate 3D7) OX=36329 GN=PF3D7_0110600 PE=4 SV=1	1	7	1710	0	23.148	6.01e-14	597	0.00309487	6.01e-14	26.1473	9	1	1
PF3D7_1336400	Q8IDW7	MAL13P1.182	tr|Q8IDW7|Q8IDW7_PLAF7 RanBPM and CLTH-like protein, putative OS=Plasmodium falciparum (isolate 3D7) OX=36329 GN=PF3D7_1336400 PE=4 SV=1	1	6	282	0	24.081	3.91e-14	568	0.00294453	3.91e-14	26.7492	9	1	1
PF3D7_1209200	Q8I5V6	PFL0460w	tr|Q8I5V6|Q8I5V6_PLAF7 U6 snRNA-associated Sm-like protein LSm7, putative OS=Plasmodium falciparum (isolate 3D7) OX=36329 GN=PF3D7_1209200 PE=4 SV=1	1	3	108	0	84.825	5.2e-09	1208	0.00626231	5.2e-09	3.79255	9	1	1
PF3D7_0717600	A0A143ZVJ7		tr|A0A143ZVJ7|A0A143ZVJ7_PLAF7 Uncharacterized protein OS=Plasmodium falciparum (isolate 3D7) OX=36329 GN=PF3D7_0717600 PE=4 SV=1	1	8	1053	0	3.878	4.28e-17	221	0.00114567	4.28e-17	25.9213	9	1	1
PF3D7_0503500	Q8I466	PFE0170c	tr|Q8I466|Q8I466_PLAF7 Protein kinase, putative OS=Plasmodium falciparum (isolate 3D7) OX=36329 GN=PF3D7_0503500 PE=4 SV=1	1	7	850	0	7.4196	2.24e-16	285	0.00147745	2.24e-16	26.4439	9	1	1
PF3D7_1355300	Q8IDE8	PF13_0293	tr|Q8IDE8|Q8IDE8_PLAF7 Histone-lysine N-methyltransferase, putative OS=Plasmodium falciparum (isolate 3D7) OX=36329 GN=PF3D7_1355300 PE=4 SV=1	1	6	509	0	50.712	7.22e-13	743	0.00385174	7.22e-13	26.5063	9	1	1
PF3D7_1441100	Q8IL59	PF14_0390	tr|Q8IL59|Q8IL59_PLAF7 Uncharacterized protein OS=Plasmodium falciparum (isolate 3D7) OX=36329 GN=PF3D7_1441100 PE=4 SV=1	1	5	227	0	253.3	1.6e-08	1242	0.00643857	1.6e-08	1.94546	9	1	1
PF3D7_0627900	C6KTB5	PFF1355w	tr|C6KTB5|C6KTB5_PLAF7 Ribonuclease P protein subunit p29, putative OS=Plasmodium falciparum (isolate 3D7) OX=36329 GN=PF3D7_0627900 PE=4 SV=1	1	4	291	0	14.901	1.68e-09	1159	0.00600829	1.68e-09	26.8924	9	1	1
PF3D7_1236100	Q8I562	PFL1745c	tr|Q8I562|Q8I562_PLAF7 Clustered-asparagine-rich protein OS=Plasmodium falciparum (isolate 3D7) OX=36329 GN=PF3D7_1236100 PE=4 SV=2	1	7	445	0	31.806	1.36e-18	114	0.00059098	1.36e-18	4.22795	9	1	1
PF3D7_1313700	Q8IEH6	MAL13P1.69	tr|Q8IEH6|Q8IEH6_PLAF7 Maf-like protein, putative OS=Plasmodium falciparum (isolate 3D7) OX=36329 GN=PF3D7_1313700 PE=3 SV=2	1	4	264	0	25.247	5.9e-15	440	0.00228098	5.9e-15	26.5551	9	1	1
PF3D7_1031400.1	A0A143ZXT6;A0A144A039		tr|A0A143ZXT6|A0A143ZXT6_PLAF7 OTU-like cysteine protease OS=Plasmodium falciparum (isolate 3D7) OX=36329 GN=PF3D7_1031400.1 PE=4 SV=1;tr|A0A144A039|A0A144A039_PLAF7 OTU-like cysteine protease OS=Plasmodium falciparum (isolate 3D7) OX=36329 GN=PF3D7_103140	2	4	938	0	4.6195	8.04e-14	618	0.00320373	8.04e-14	26.9214	9	1	1
PF3D7_0109200	Q8I0V9	PFA_0450c	tr|Q8I0V9|Q8I0V9_PLAF7 Cleavage and polyadenylation specificity factor subunit 5 OS=Plasmodium falciparum (isolate 3D7) OX=36329 GN=PF3D7_0109200 PE=3 SV=1	1	5	232	0	39.861	1.41e-08	1235	0.00640228	1.41e-08	26.5024	9	1	1
PF3D7_1205100	Q8I5Z4	PFL0255c	tr|Q8I5Z4|Q8I5Z4_PLAF7 O-phosphoseryl-tRNA(Sec) selenium transferase OS=Plasmodium falciparum (isolate 3D7) OX=36329 GN=PF3D7_1205100 PE=3 SV=1	1	5	578	0	0.65486	2.15e-09	1167	0.00604977	2.15e-09	26.8062	9	1	1
PF3D7_0610200	C6KSU9	PFF0505c	tr|C6KSU9|C6KSU9_PLAF7 RNA-binding protein 25, putative OS=Plasmodium falciparum (isolate 3D7) OX=36329 GN=PF3D7_0610200 PE=4 SV=1	1	5	960	0	1.8544	2.03e-09	1165	0.0060394	2.03e-09	27.2208	9	1	1
PF3D7_0806500	Q8IAQ5	PF08_0115	tr|Q8IAQ5|Q8IAQ5_PLAF7 DnaJ protein, putative OS=Plasmodium falciparum (isolate 3D7) OX=36329 GN=PF3D7_0806500 PE=4 SV=1	1	4	675	0	17.986	3.23e-13	701	0.00363401	3.23e-13	26.6278	9	1	1
PF3D7_0810000	Q8IAT5	PF08_0099	tr|Q8IAT5|Q8IAT5_PLAF7 Acyl-CoA binding protein, putative OS=Plasmodium falciparum (isolate 3D7) OX=36329 GN=PF3D7_0810000 PE=4 SV=1	1	5	90	0	5.1558	1.28e-09	1146	0.0059409	1.28e-09	2.60163	9	1	1
PF3D7_1363200	Q8ID74	PF13_0334	tr|Q8ID74|Q8ID74_PLAF7 Bifunctional polynucleotide phosphatase/kinase OS=Plasmodium falciparum (isolate 3D7) OX=36329 GN=PF3D7_1363200 PE=4 SV=1	1	8	462	0	7.854	4.69e-16	319	0.00165371	4.69e-16	26.3389	9	1	1
PF3D7_0509800	Q8I406	PFE0485w	tr|Q8I406|Q8I406_PLAF7 Phosphatidylinositol 4-kinase OS=Plasmodium falciparum (isolate 3D7) OX=36329 GN=PF3D7_0509800 PE=3 SV=1	1	6	1559	0	2.9769	6.69e-13	737	0.00382063	6.69e-13	26.2421	9	1	1
PF3D7_1366400	A0A5K1K9G4		tr|A0A5K1K9G4|A0A5K1K9G4_PLAF7 Rhoptry protein RHOP148 OS=Plasmodium falciparum (isolate 3D7) OX=36329 GN=PF3D7_1366400 PE=4 SV=1	1	7	1262	0	10.943	7.17e-14	611	0.00316744	7.17e-14	26.3264	9	1	1
PF3D7_1369500	A0A5K1K8X7		tr|A0A5K1K8X7|A0A5K1K8X7_PLAF7 Uncharacterized protein OS=Plasmodium falciparum (isolate 3D7) OX=36329 GN=PF3D7_1369500 PE=4 SV=1	1	9	1106	0	11.933	2.64e-18	126	0.000653188	2.64e-18	25.8826	9	1	1
PF3D7_0524300	Q8I3M2	PFE1210c	tr|Q8I3M2|Q8I3M2_PLAF7 Uncharacterized protein OS=Plasmodium falciparum (isolate 3D7) OX=36329 GN=PF3D7_0524300 PE=4 SV=1	1	3	406	0	10.338	3.07e-13	696	0.00360809	3.07e-13	26.8429	9	1	1
PF3D7_1235500	Q8I567	PFL1715w	tr|Q8I567|Q8I567_PLAF7 mRNA methyltransferase, putative OS=Plasmodium falciparum (isolate 3D7) OX=36329 GN=PF3D7_1235500 PE=3 SV=1	1	6	646	0	15.901	1.01e-10	1011	0.00524106	1.01e-10	26.2478	9	1	1
PF3D7_0503300	Q8I468	PFE0160c	tr|Q8I468|Q8I468_PLAF7 Serine/arginine-rich splicing factor 12 OS=Plasmodium falciparum (isolate 3D7) OX=36329 GN=PF3D7_0503300 PE=4 SV=1	1	3	308	0.00054171	0.35499	1.36e-12	777	0.00402799	1.36e-12	26.7473	9	1	1
PF3D7_0805700	C0H4R8	PfTSTK0	tr|C0H4R8|C0H4R8_PLAF7 Serine/threonine protein kinase, FIKK family OS=Plasmodium falciparum (isolate 3D7) OX=36329 GN=PF3D7_0805700 PE=4 SV=1	1	8	1457	0	12.028	1.26e-14	497	0.00257646	1.26e-14	3.09676	9	1	1
PF3D7_1250700	Q8I4S7	PFL2435w	tr|Q8I4S7|Q8I4S7_PLAF7 Transcription initiation factor IIA subunit 2, putative OS=Plasmodium falciparum (isolate 3D7) OX=36329 GN=PF3D7_1250700 PE=4 SV=1	1	5	177	0	37.761	7e-13	739	0.003831	7e-13	26.829	9	1	1
PF3D7_1309400	Q8IEM0	PF13_0050	tr|Q8IEM0|Q8IEM0_PLAF7 HORMA domain protein, putative OS=Plasmodium falciparum (isolate 3D7) OX=36329 GN=PF3D7_1309400 PE=4 SV=1	1	4	1327	0	41.363	1.79e-15	383	0.00198548	1.79e-15	26.8964	9	1	1
PF3D7_0720400	Q8IBP8	PF07_0085	tr|Q8IBP8|Q8IBP8_PLAF7 Apoptosis-inducing factor, putative OS=Plasmodium falciparum (isolate 3D7) OX=36329 GN=PF3D7_0720400 PE=4 SV=1	1	5	642	0	6.1548	1.05e-09	1136	0.00588906	1.05e-09	26.7139	9	1	1
PF3D7_1104700.2	A0A143ZZY9;Q8IIV5	PF11_0058	tr|A0A143ZZY9|A0A143ZZY9_PLAF7 DNA-directed RNA polymerase III subunit RPC8, putative OS=Plasmodium falciparum (isolate 3D7) OX=36329 GN=PF3D7_1104700.2 PE=4 SV=1;tr|Q8IIV5|Q8IIV5_PLAF7 DNA-directed RNA polymerase III subunit RPC8, putative OS=Plasmodium f	2	3	184	0	21.758	1.21e-09	1144	0.00593053	1.21e-09	27.4352	9	1	1
PF3D7_0507900	C0H4D1	PFE0390w	tr|C0H4D1|C0H4D1_PLAF7 Uncharacterized protein OS=Plasmodium falciparum (isolate 3D7) OX=36329 GN=PF3D7_0507900 PE=4 SV=1	1	4	117	0	2.2825	5.59e-07	1312	0.00680145	5.59e-07	26.8888	9	1	1
PF3D7_1430400	Q8ILG0	PF14_0283	tr|Q8ILG0|Q8ILG0_PLAF7 Autophagy protein 5 OS=Plasmodium falciparum (isolate 3D7) OX=36329 GN=PF3D7_1430400 PE=3 SV=1	1	7	863	0	1.6998	1.44e-14	506	0.00262312	1.44e-14	26.7032	9	1	1
PF3D7_1349800	Q8IDK1	PF13_0261	tr|Q8IDK1|Q8IDK1_PLAF7 GPN-loop GTPase 3 OS=Plasmodium falciparum (isolate 3D7) OX=36329 GN=PF3D7_1349800 PE=3 SV=1	1	4	439	0	10.079	8.58e-18	160	0.000829445	8.58e-18	26.9681	9	1	1
PF3D7_1473700	Q8IKA0	PF14_0706	tr|Q8IKA0|Q8IKA0_PLAF7 Nucleoporin NUP116/NSP116, putative OS=Plasmodium falciparum (isolate 3D7) OX=36329 GN=PF3D7_1473700 PE=4 SV=1	1	4	1253	0	10.495	1.2e-13	647	0.00335407	1.2e-13	26.4141	9	1	1
PF3D7_0729300	Q8IBG6	PF07_0121	tr|Q8IBG6|Q8IBG6_PLAF7 60S ribosomal export protein NMD3, putative OS=Plasmodium falciparum (isolate 3D7) OX=36329 GN=PF3D7_0729300 PE=4 SV=1	1	4	888	0	3.0103	1.07e-13	641	0.00332297	1.07e-13	27.1024	9	1	1
PF3D7_0105800	Q8I283	PFA_0285c	tr|Q8I283|Q8I283_PLAF7 Cyclin-dependent kinases regulatory subunit OS=Plasmodium falciparum (isolate 3D7) OX=36329 GN=PF3D7_0105800 PE=3 SV=1	1	6	832	0	6.9626	2.05e-12	800	0.00414723	2.05e-12	26.3602	9	1	1
PF3D7_1245500	A0A144A322		tr|A0A144A322|A0A144A322_PLAF7 Uncharacterized protein OS=Plasmodium falciparum (isolate 3D7) OX=36329 GN=PF3D7_1245500 PE=4 SV=1	1	5	460	0	4.5134	1.48e-16	271	0.00140487	1.48e-16	26.1631	9	1	1
PF3D7_1146000	Q8IHQ8	PF11_0471	tr|Q8IHQ8|Q8IHQ8_PLAF7 Ribosome assembly protein 4, putative OS=Plasmodium falciparum (isolate 3D7) OX=36329 GN=PF3D7_1146000 PE=4 SV=1	1	4	645	0	12.108	2.75e-10	1065	0.00552099	2.75e-10	26.8371	9	1	1
PF3D7_1347100	Q8IDM7	PF13_0251	tr|Q8IDM7|Q8IDM7_PLAF7 DNA topoisomerase OS=Plasmodium falciparum (isolate 3D7) OX=36329 GN=PF3D7_1347100 PE=3 SV=1	1	5	710	0	2.9193	6.33e-13	735	0.00381026	6.33e-13	26.2659	9	1	1
PF3D7_0410400	Q9U0I4	PFD0515w	tr|Q9U0I4|Q9U0I4_PLAF7 Exosome complex component RRP4 OS=Plasmodium falciparum (isolate 3D7) OX=36329 GN=PF3D7_0410400 PE=4 SV=1	1	3	338	0	1.0698	1.59e-08	1241	0.00643338	1.59e-08	26.6907	9	1	1
PF3D7_1327600	Q8IE38	PF13_0159	tr|Q8IE38|Q8IE38_PLAF7 Nicotinamide/nicotinic acid mononucleotide adenylyltransferase OS=Plasmodium falciparum (isolate 3D7) OX=36329 GN=PF3D7_1327600 PE=1 SV=1	1	5	204	0	6.4939	1.99e-10	1044	0.00541213	1.99e-10	26.6831	9	1	1
PF3D7_1418000	Q8ILR6	UFD1	tr|Q8ILR6|Q8ILR6_PLAF7 Ubiquitin fusion degradation protein 1, putative OS=Plasmodium falciparum (isolate 3D7) OX=36329 GN=PF3D7_1418000 PE=4 SV=2	1	3	282	0	1.4758	2.06e-13	670	0.0034733	2.06e-13	27.3192	9	1	1
PF3D7_1331200	A0A5K1K984		tr|A0A5K1K984|A0A5K1K984_PLAF7 Uncharacterized protein OS=Plasmodium falciparum (isolate 3D7) OX=36329 GN=PF3D7_1331200 PE=4 SV=1	1	4	407	0	31.9	8.5e-12	867	0.00449456	8.5e-12	26.6302	9	1	1
PF3D7_1466400	Q8IKH2	ApiAP2	tr|Q8IKH2|Q8IKH2_PLAF7 AP2 domain transcription factor AP2-EXP OS=Plasmodium falciparum (isolate 3D7) OX=36329 GN=PF3D7_1466400 PE=1 SV=1	1	4	813	0	61.775	1.32e-10	1021	0.0052929	1.32e-10	26.78	9	1	1
PF3D7_0819000	Q8IB25	MAL8P1.64	tr|Q8IB25|Q8IB25_PLAF7 Cleavage and polyadenylation specificity factor subunit 2 OS=Plasmodium falciparum (isolate 3D7) OX=36329 GN=PF3D7_0819000 PE=3 SV=1	1	7	1313	0	5.7284	5.02e-13	721	0.00373769	5.02e-13	26.1747	9	1	1
PF3D7_1359700	C0H5J3	MAL13P1.296	tr|C0H5J3|C0H5J3_PLAF7 Uncharacterized protein OS=Plasmodium falciparum (isolate 3D7) OX=36329 GN=PF3D7_1359700 PE=4 SV=1	1	8	3698	0	2.2258	1.68e-14	517	0.00268015	1.68e-14	26.217	9	1	1
PF3D7_1003300	Q8IK04	PF10_0036	tr|Q8IK04|Q8IK04_PLAF7 N-terminal acetyltransferase A complex catalytic subunit ARD1, putative OS=Plasmodium falciparum (isolate 3D7) OX=36329 GN=PF3D7_1003300 PE=4 SV=1	1	3	152	0	19.367	7.18e-10	1118	0.00579575	7.18e-10	26.5094	9	1	1
PF3D7_0527600	C0H4G4	PFE1375c	tr|C0H4G4|C0H4G4_PLAF7 Uncharacterized protein OS=Plasmodium falciparum (isolate 3D7) OX=36329 GN=PF3D7_0527600 PE=4 SV=2	1	4	455	0	25.277	9.82e-14	636	0.00329705	9.82e-14	26.7581	9	1	1
PF3D7_1322200	A0A5K1K9E8		tr|A0A5K1K9E8|A0A5K1K9E8_PLAF7 Uncharacterized protein OS=Plasmodium falciparum (isolate 3D7) OX=36329 GN=PF3D7_1322200 PE=4 SV=1	1	5	3438	0	3.8615	3.93e-09	1198	0.00621047	3.93e-09	27.2323	9	1	1
PF3D7_1234500	Q8I577	PFL1665c	tr|Q8I577|Q8I577_PLAF7 Uncharacterized protein OS=Plasmodium falciparum (isolate 3D7) OX=36329 GN=PF3D7_1234500 PE=4 SV=1	1	6	384	0	6.6076	1.63e-10	1035	0.00536547	1.63e-10	26.296	9	1	1
PF3D7_1238700	A0A144A4I8		tr|A0A144A4I8|A0A144A4I8_PLAF7 BTB/POZ domain-containing protein, putative OS=Plasmodium falciparum (isolate 3D7) OX=36329 GN=PF3D7_1238700 PE=4 SV=1	1	5	505	0	15.291	4.26e-10	1086	0.00562986	4.26e-10	26.0964	9	1	1
PF3D7_1222600	Q8I5I9	PFL1085w	tr|Q8I5I9|Q8I5I9_PLAF7 AP2 domain transcription factor AP2-G OS=Plasmodium falciparum (isolate 3D7) OX=36329 GN=PF3D7_1222600 PE=4 SV=1	1	3	2432	0	29.459	7.73e-15	460	0.00238465	7.73e-15	26.246	9	1	1
PF3D7_1443000	Q8IL41	PF14_0408	tr|Q8IL41|Q8IL41_PLAF7 Serine/threonine protein kinase OS=Plasmodium falciparum (isolate 3D7) OX=36329 GN=PF3D7_1443000 PE=4 SV=1	1	6	1268	0	2.2146	8.18e-12	862	0.00446864	8.18e-12	25.9243	9	1	1
PF3D7_1115200	Q8IIL1	PF11_0160	tr|Q8IIL1|Q8IIL1_PLAF7 Histone-lysine N-methyltransferase SET7 OS=Plasmodium falciparum (isolate 3D7) OX=36329 GN=PF3D7_1115200 PE=4 SV=2	1	5	793	0	19.61	1.52e-14	508	0.00263349	1.52e-14	26.0774	9	1	1
PF3D7_0621500	C6KT53	PFF1040w	tr|C6KT53|C6KT53_PLAF7 Ribonuclease P/MRP protein subunit RPP1, putative OS=Plasmodium falciparum (isolate 3D7) OX=36329 GN=PF3D7_0621500 PE=4 SV=1	1	7	343	0	17.426	1e-05	1357	0.00703473	1e-05	27.0733	9	1	1
PF3D7_1336900	Q8IDW3	PF13_0205	tr|Q8IDW3|Q8IDW3_PLAF7 Tryptophan--tRNA ligase OS=Plasmodium falciparum (isolate 3D7) OX=36329 GN=PF3D7_1336900 PE=1 SV=1	1	5	632	0	8.6516	1.97e-13	666	0.00345257	1.97e-13	27.4103	9	1	1
PF3D7_0418100	Q8I1Q6	PFD0875c	tr|Q8I1Q6|Q8I1Q6_PLAF7 Protein SOC1, putative OS=Plasmodium falciparum (isolate 3D7) OX=36329 GN=PF3D7_0418100 PE=4 SV=1	1	4	1215	0	6.7512	4.29e-20	58	0.000300674	4.29e-20	26.3991	9	1	1
PF3D7_0717500	Q8IBS5	CPK4	sp|Q8IBS5|CDPK4_PLAF7 Calcium-dependent protein kinase 4 OS=Plasmodium falciparum (isolate 3D7) OX=36329 GN=CPK4 PE=1 SV=3	1	4	528	0	14.291	5.86e-13	730	0.00378434	5.86e-13	26.4453	9	1	1
PF3D7_1038100	Q8IJ27	PF10_0373	tr|Q8IJ27|Q8IJ27_PLAF7 GDP dissociation inhibitor, putative OS=Plasmodium falciparum (isolate 3D7) OX=36329 GN=PF3D7_1038100 PE=4 SV=1	1	6	980	0	25.663	3.13e-15	414	0.00214619	3.13e-15	26.0153	9	1	1
PF3D7_1211200	Q8I5T8	PFL0555c	tr|Q8I5T8|Q8I5T8_PLAF7 Uncharacterized protein OS=Plasmodium falciparum (isolate 3D7) OX=36329 GN=PF3D7_1211200 PE=4 SV=1	1	6	1831	0	3.7652	2.25e-11	923	0.00478486	2.25e-11	26.3378	9	1	1
PF3D7_0415800	Q8I1S9	PFD0765w	tr|Q8I1S9|Q8I1S9_PLAF7 RING zinc finger protein, putative OS=Plasmodium falciparum (isolate 3D7) OX=36329 GN=PF3D7_0415800 PE=4 SV=1	1	5	875	0	20.166	6.52e-15	451	0.002338	6.52e-15	26.1722	9	1	1
PF3D7_0906300	Q8I386	PFI0310w	tr|Q8I386|Q8I386_PLAF7 Maf-like protein, putative OS=Plasmodium falciparum (isolate 3D7) OX=36329 GN=PF3D7_0906300 PE=4 SV=1	1	4	434	0	170.8	4.51e-12	838	0.00434422	4.51e-12	26.3381	9	1	1
PF3D7_1203500	Q8I610	PFL0175c	tr|Q8I610|Q8I610_PLAF7 Threonylcarbamoyl-AMP synthase, putative OS=Plasmodium falciparum (isolate 3D7) OX=36329 GN=PF3D7_1203500 PE=4 SV=1	1	4	556	0	0.80343	1.35e-14	502	0.00260239	1.35e-14	26.6396	9	1	1
PF3D7_0406700	C0H492	PFD0330w	tr|C0H492|C0H492_PLAF7 KLRAQ domain-containing protein OS=Plasmodium falciparum (isolate 3D7) OX=36329 GN=PF3D7_0406700 PE=4 SV=2	1	5	847	0	12.574	1.26e-17	178	0.000922758	1.26e-17	26.431	9	1	1
PF3D7_1227700	Q8I5E1	PFL1340c	tr|Q8I5E1|Q8I5E1_PLAF7 Uncharacterized protein OS=Plasmodium falciparum (isolate 3D7) OX=36329 GN=PF3D7_1227700 PE=4 SV=1	1	5	771	0	3.5894	4.3e-10	1087	0.00563504	4.3e-10	26.0181	9	1	1
PF3D7_1355700	Q8IDE5	MAL13P1.275	tr|Q8IDE5|Q8IDE5_PLAF7 NLI interacting factor-like phosphatase, putative OS=Plasmodium falciparum (isolate 3D7) OX=36329 GN=PF3D7_1355700 PE=4 SV=1	1	6	1288	0	23.812	6.04e-17	231	0.00119751	6.04e-17	26.333	9	1	1
PF3D7_0610900	C6KSV4	PFF0535c	tr|C6KSV4|C6KSV4_PLAF7 Transcription elongation factor SPT5, putative OS=Plasmodium falciparum (isolate 3D7) OX=36329 GN=PF3D7_0610900 PE=4 SV=1	1	5	1280	0	8.3763	1.84e-16	279	0.00144634	1.84e-16	26.3238	9	1	1
PF3D7_0705300	Q8IC17	PfORC2	tr|Q8IC17|Q8IC17_PLAF7 Origin recognition complex subunit 2 OS=Plasmodium falciparum (isolate 3D7) OX=36329 GN=PF3D7_0705300 PE=4 SV=1	1	6	825	0	12.691	4.84e-11	965	0.00500259	4.84e-11	25.8415	9	1	1
PF3D7_0606900	C6KSR7	PFF0340c	tr|C6KSR7|C6KSR7_PLAF7 Glutaredoxin-like protein OS=Plasmodium falciparum (isolate 3D7) OX=36329 GN=PF3D7_0606900 PE=4 SV=1	1	5	219	0	33.061	1.72e-10	1039	0.00538621	1.72e-10	26.8999	9	1	1
PF3D7_0815800	Q8IAZ5	MAL8P1.82	tr|Q8IAZ5|Q8IAZ5_PLAF7 Vacuolar protein sorting-associated protein 9, putative OS=Plasmodium falciparum (isolate 3D7) OX=36329 GN=PF3D7_0815800 PE=4 SV=1	1	7	1833	0	8.1573	1.17e-11	887	0.00459824	1.17e-11	26.3937	9	1	1
PF3D7_1406700	Q8IM27	PF14_0064	tr|Q8IM27|Q8IM27_PLAF7 Vacuolar protein sorting-associated protein 29 OS=Plasmodium falciparum (isolate 3D7) OX=36329 GN=PF3D7_1406700 PE=3 SV=1	1	3	194	0.00053135	0.04374	1.77e-15	381	0.00197512	1.77e-15	2.89902	9	1	1
PF3D7_1319300	Q8IEC3	PF13_0109	tr|Q8IEC3|Q8IEC3_PLAF7 tRNA (Guanine(26)-N(2))-dimethyltransferase, putative OS=Plasmodium falciparum (isolate 3D7) OX=36329 GN=PF3D7_1319300 PE=3 SV=1	1	4	804	0	4.7504	1.11e-14	487	0.00252462	1.11e-14	26.4371	9	1	1
PF3D7_1245900	Q8I4X3	PFL2200w	tr|Q8I4X3|Q8I4X3_PLAF7 Ankyrin-repeat protein, putative OS=Plasmodium falciparum (isolate 3D7) OX=36329 GN=PF3D7_1245900 PE=4 SV=1	1	3	311	0	23.233	1.17e-12	767	0.00397615	1.17e-12	26.5989	9	1	1
PF3D7_0520500	Q8I3Q5	PFE1030c	tr|Q8I3Q5|Q8I3Q5_PLAF7 Phosphomethylpyrimidine kinase, putative OS=Plasmodium falciparum (isolate 3D7) OX=36329 GN=PF3D7_0520500 PE=4 SV=1	1	5	310	0	60.955	3.69e-11	949	0.00491965	3.69e-11	26.1586	9	1	1
PF3D7_1349300	Q8IDK6	PfTKL-3	tr|Q8IDK6|Q8IDK6_PLAF7 Tyrosine kinase-like protein OS=Plasmodium falciparum (isolate 3D7) OX=36329 GN=PF3D7_1349300 PE=4 SV=1	1	5	1807	0	2.2483	1.24e-16	265	0.00137377	1.24e-16	25.9669	9	1	1
PF3D7_0111400	B9ZSI9	PFA_0550w	tr|B9ZSI9|B9ZSI9_PLAF7 Uncharacterized protein OS=Plasmodium falciparum (isolate 3D7) OX=36329 GN=PF3D7_0111400 PE=4 SV=1	1	3	718	0	35.927	2.79e-11	938	0.00486262	2.79e-11	26.9716	9	1	1
PF3D7_1232500	A0A144A1B9		tr|A0A144A1B9|A0A144A1B9_PLAF7 CG2-related protein, putative OS=Plasmodium falciparum (isolate 3D7) OX=36329 GN=PF3D7_1232500 PE=4 SV=1	1	6	1071	0	3.4696	1.5e-10	1029	0.00533437	1.5e-10	26.1982	9	1	1
PF3D7_0306100	O97243	PFC0265c	tr|O97243|O97243_PLAF7 Uncharacterized protein OS=Plasmodium falciparum (isolate 3D7) OX=36329 GN=PF3D7_0306100 PE=4 SV=3	1	5	628	0	17.912	3.66e-10	1078	0.00558839	3.66e-10	26.0231	9	1	1
PF3D7_1007700	Q8IJW6	PF10_0075	tr|Q8IJW6|Q8IJW6_PLAF7 AP2 domain transcription factor AP2-I OS=Plasmodium falciparum (isolate 3D7) OX=36329 GN=PF3D7_1007700 PE=4 SV=1	1	4	1597	0	13.299	1.12e-12	766	0.00397097	1.12e-12	26.579	9	1	1
PF3D7_1434600	Q8ILB8	PF14_0327	tr|Q8ILB8|Q8ILB8_PLAF7 Methionine aminopeptidase 2 OS=Plasmodium falciparum (isolate 3D7) OX=36329 GN=PF3D7_1434600 PE=3 SV=1	1	6	628	0	20.406	1.52e-10	1031	0.00534474	1.52e-10	3.39555	9	1	1
PF3D7_0730200	Q8IBF8	MAL7P1.164	tr|Q8IBF8|Q8IBF8_PLAF7 AP complex subunit beta OS=Plasmodium falciparum (isolate 3D7) OX=36329 GN=PF3D7_0730200 PE=3 SV=2	1	6	858	0	2.9357	5.68e-11	976	0.00505962	5.68e-11	26.1565	9	1	1
PF3D7_1231500	Q8I5A5	PFL1520w	tr|Q8I5A5|Q8I5A5_PLAF7 Mitosis protein dim1, putative OS=Plasmodium falciparum (isolate 3D7) OX=36329 GN=PF3D7_1231500 PE=3 SV=1	1	3	139	0	1.483	1.18e-12	768	0.00398134	1.18e-12	26.7708	9	1	1
PF3D7_1445700	Q8IL16	PF14_0434	tr|Q8IL16|Q8IL16_PLAF7 Uncharacterized protein OS=Plasmodium falciparum (isolate 3D7) OX=36329 GN=PF3D7_1445700 PE=4 SV=1	1	2	351	0	2.0022	9.88e-11	1009	0.00523069	9.88e-11	27.0095	9	1	1
PF3D7_0211200	O96193	Rab5a	tr|O96193|O96193_PLAF7 Ras-related protein Rab-5A OS=Plasmodium falciparum (isolate 3D7) OX=36329 GN=PF3D7_0211200 PE=1 SV=1	1	4	235	0	0.73281	6.31e-14	600	0.00311042	6.31e-14	26.5579	9	1	1
PF3D7_0821200	Q8IB46	PF08_0043	tr|Q8IB46|Q8IB46_PLAF7 Uncharacterized protein OS=Plasmodium falciparum (isolate 3D7) OX=36329 GN=PF3D7_0821200 PE=4 SV=1	1	3	191	0	26.087	4.38e-13	718	0.00372214	4.38e-13	26.7596	9	1	1
PF3D7_0217700	Q8I657	PFB0826c	tr|Q8I657|Q8I657_PLAF7 E2F-associated phosphoprotein, putative OS=Plasmodium falciparum (isolate 3D7) OX=36329 GN=PF3D7_0217700 PE=4 SV=1	1	3	234	0	1.1696	2.25e-14	537	0.00278383	2.25e-14	27.5299	9	1	1
PF3D7_0921800	C0H549	PFI1070c	tr|C0H549|C0H549_PLAF7 Ribosome production factor 1, putative OS=Plasmodium falciparum (isolate 3D7) OX=36329 GN=PF3D7_0921800 PE=4 SV=1	1	5	328	0	3.9669	9.54e-09	1226	0.00635563	9.54e-09	26.0972	9	1	1
PF3D7_0914400	Q8I308	PFI0705w	tr|Q8I308|Q8I308_PLAF7 Uncharacterized protein OS=Plasmodium falciparum (isolate 3D7) OX=36329 GN=PF3D7_0914400 PE=4 SV=1	1	5	249	0	18.31	1.18e-11	888	0.00460342	1.18e-11	3.44733	9	1	1
PF3D7_0518600	Q8I3S4	PFE0930w	tr|Q8I3S4|Q8I3S4_PLAF7 WD repeat-containing protein 26, putative OS=Plasmodium falciparum (isolate 3D7) OX=36329 GN=PF3D7_0518600 PE=4 SV=1	1	3	1276	0	19.562	4.03e-19	89	0.000461379	4.03e-19	26.6117	9	1	1
PF3D7_1119700	Q8IIH0	PF11_0204	tr|Q8IIH0|Q8IIH0_PLAF7 Uncharacterized protein OS=Plasmodium falciparum (isolate 3D7) OX=36329 GN=PF3D7_1119700 PE=4 SV=1	1	4	352	0	37.779	3.5e-10	1075	0.00557284	3.5e-10	26.6718	9	1	1
PF3D7_0935000	Q8I2G9	PFI1695c	tr|Q8I2G9|Q8I2G9_PLAF7 U2 small nuclear ribonucleoprotein B, putative OS=Plasmodium falciparum (isolate 3D7) OX=36329 GN=PF3D7_0935000 PE=4 SV=1	1	4	193	0	41.299	3.68e-09	1193	0.00618455	3.68e-09	26.6257	9	1	1
PF3D7_1356600	Q8IDD6	PF13_0303	tr|Q8IDD6|Q8IDD6_PLAF7 Regulator of chromosome condensation, putative OS=Plasmodium falciparum (isolate 3D7) OX=36329 GN=PF3D7_1356600 PE=4 SV=1	1	2	480	0	17.342	1.36e-23	3	1.56e-05	1.36e-23	26.9019	9	1	1
PF3D7_1405500	Q8IM39	PF14_0052	tr|Q8IM39|Q8IM39_PLAF7 COBW domain-containing protein 1, putative OS=Plasmodium falciparum (isolate 3D7) OX=36329 GN=PF3D7_1405500 PE=4 SV=1	1	3	575	0	1.7282	3.29e-15	417	0.00216174	3.29e-15	26.635	9	1	1
PF3D7_0404300	Q8I1Y6	PFD0207c	tr|Q8I1Y6|Q8I1Y6_PLAF7 RanBD1 domain-containing protein OS=Plasmodium falciparum (isolate 3D7) OX=36329 GN=PF3D7_0404300 PE=4 SV=2	1	5	631	0	11.196	4.58e-15	432	0.0022395	4.58e-15	3.30882	9	1	1
PF3D7_1020700	Q8IJJ5	PF10_0200	tr|Q8IJJ5|Q8IJJ5_PLAF7 RNA cytidine acetyltransferase OS=Plasmodium falciparum (isolate 3D7) OX=36329 GN=PF3D7_1020700 PE=3 SV=1	1	4	1269	0	2.1583	1.88e-11	914	0.00473821	1.88e-11	26.1279	9	1	1
PF3D7_1360400	A0A5K1K912		tr|A0A5K1K912|A0A5K1K912_PLAF7 Uncharacterized protein OS=Plasmodium falciparum (isolate 3D7) OX=36329 GN=PF3D7_1360400 PE=4 SV=1	1	4	313	0	4.6506	8.08e-09	1221	0.0063297	8.08e-09	26.5018	9	1	1
PF3D7_1461400	Q8IKL8	PF14_0586	tr|Q8IKL8|Q8IKL8_PLAF7 MORN repeat protein, putative OS=Plasmodium falciparum (isolate 3D7) OX=36329 GN=PF3D7_1461400 PE=4 SV=2	1	4	322	0	23.458	1.54e-06	1331	0.00689995	1.54e-06	26.1657	9	1	1
PF3D7_1119800	Q8IIG9	PF11_0205	tr|Q8IIG9|Q8IIG9_PLAF7 Alternative splicing factor ASF-1, putative OS=Plasmodium falciparum (isolate 3D7) OX=36329 GN=PF3D7_1119800 PE=4 SV=1	1	2	200	0	11.412	2.74e-12	817	0.00423535	2.74e-12	26.927	9	1	1
PF3D7_1460500	Q8IKM7	PF14_0577	tr|Q8IKM7|Q8IKM7_PLAF7 Uncharacterized protein OS=Plasmodium falciparum (isolate 3D7) OX=36329 GN=PF3D7_1460500 PE=4 SV=1	1	8	1632	0	22.552	1.17e-06	1325	0.00686884	1.17e-06	25.5283	9	1	1
PF3D7_0412300	Q9U0G7	PFD0610w	tr|Q9U0G7|Q9U0G7_PLAF7 Phosphopantothenoylcysteine synthetase, putative OS=Plasmodium falciparum (isolate 3D7) OX=36329 GN=PF3D7_0412300 PE=4 SV=1	1	5	540	0	5.6687	5.26e-12	843	0.00437014	5.26e-12	26.4215	9	1	1
PF3D7_0611900	C6KSW3	PFF0580w	tr|C6KSW3|C6KSW3_PLAF7 Lsm12, putative OS=Plasmodium falciparum (isolate 3D7) OX=36329 GN=PF3D7_0611900 PE=4 SV=1	1	2	176	0	2.1195	3.24e-09	1186	0.00614826	3.24e-09	26.7801	9	1	1
PF3D7_1473100	Q8IKA7	PF14_0699	tr|Q8IKA7|Q8IKA7_PLAF7 GTPase-activating protein, putative OS=Plasmodium falciparum (isolate 3D7) OX=36329 GN=PF3D7_1473100 PE=4 SV=1	1	5	592	0	13.969	1.64e-09	1158	0.00600311	1.64e-09	26.3019	9	1	1
PF3D7_1446500	Q8IL08	PF14_0442	tr|Q8IL08|Q8IL08_PLAF7 Nucleoporin NUP313, putative OS=Plasmodium falciparum (isolate 3D7) OX=36329 GN=PF3D7_1446500 PE=4 SV=1	1	5	3001	0	13.667	5.09e-13	722	0.00374287	5.09e-13	26.1745	9	1	1
PF3D7_1205500	Q8I5Z0	PFL0275w	tr|Q8I5Z0|Q8I5Z0_PLAF7 Zinc finger protein, putative OS=Plasmodium falciparum (isolate 3D7) OX=36329 GN=PF3D7_1205500 PE=4 SV=1	1	3	1785	0	4.8832	6.66e-19	99	0.000513219	6.66e-19	26.5296	9	1	1
PF3D7_0627100	C6KTA7	PFF1315w	tr|C6KTA7|C6KTA7_PLAF7 Ankyrin-repeat protein, putative OS=Plasmodium falciparum (isolate 3D7) OX=36329 GN=PF3D7_0627100 PE=4 SV=1	1	4	1712	0	7.2574	4.3e-12	835	0.00432867	4.3e-12	25.9371	9	1	1
PF3D7_1123800	Q8IIC5	PF11_0249	tr|Q8IIC5|Q8IIC5_PLAF7 Structural maintenance of chromosomes protein 5, putative OS=Plasmodium falciparum (isolate 3D7) OX=36329 GN=PF3D7_1123800 PE=4 SV=1	1	7	1268	0	38.478	2.87e-09	1181	0.00612234	2.87e-09	25.697	9	1	1
PF3D7_1356300	Q8IDD9	PF13_0301	tr|Q8IDD9|Q8IDD9_PLAF7 Ubiquitin-conjugating enzyme E2, putative OS=Plasmodium falciparum (isolate 3D7) OX=36329 GN=PF3D7_1356300 PE=3 SV=1	1	5	202	0	26.704	5.11e-11	971	0.0050337	5.11e-11	26.4605	9	1	1
PF3D7_1141300	Q8IHV2	PF11_0424	tr|Q8IHV2|Q8IHV2_PLAF7 Uncharacterized protein OS=Plasmodium falciparum (isolate 3D7) OX=36329 GN=PF3D7_1141300 PE=4 SV=1	1	4	1012	0	18.919	6.39e-10	1108	0.00574391	6.39e-10	25.6843	9	1	1
PF3D7_1209400	Q8I5V5	PFL0470w	tr|Q8I5V5|Q8I5V5_PLAF7 Probable cytosolic iron-sulfur protein assembly protein CIAO1 homolog OS=Plasmodium falciparum (isolate 3D7) OX=36329 GN=PF3D7_1209400 PE=3 SV=1	1	3	792	0	34.881	8.17e-14	620	0.0032141	8.17e-14	26.7481	9	1	1
PF3D7_1331100	C0H5F0	MAL13P1.166	tr|C0H5F0|C0H5F0_PLAF7 DNA polymerase theta, putative OS=Plasmodium falciparum (isolate 3D7) OX=36329 GN=PF3D7_1331100 PE=4 SV=1	1	7	1244	0	7.9918	9.64e-12	878	0.00455158	9.64e-12	25.7367	9	1	1
PF3D7_1003500	Q8IK02	PF10_0038	tr|Q8IK02|Q8IK02_PLAF7 40S ribosomal protein S20e, putative OS=Plasmodium falciparum (isolate 3D7) OX=36329 GN=PF3D7_1003500 PE=1 SV=1	1	4	118	0	12.278	5.19e-08	1269	0.00657854	5.19e-08	1.73394	9	1	1
PF3D7_1033500	Q8IJ73	PF10_0326	tr|Q8IJ73|Q8IJ73_PLAF7 WD repeat-containing protein 70, putative OS=Plasmodium falciparum (isolate 3D7) OX=36329 GN=PF3D7_1033500 PE=4 SV=1	1	4	709	0.00054025	0.32331	5.74e-16	332	0.0017211	5.74e-16	26.0624	9	1	1
PF3D7_1212900	Q8I5S4	PFL0635c	tr|Q8I5S4|Q8I5S4_PLAF7 Bromodomain protein 2, putative OS=Plasmodium falciparum (isolate 3D7) OX=36329 GN=PF3D7_1212900 PE=4 SV=1	1	5	1088	0	4.2243	1.05e-17	171	0.00088647	1.05e-17	25.6996	9	1	1
PF3D7_1324000	Q8IE77	PF13_0137	tr|Q8IE77|Q8IE77_PLAF7 Uncharacterized protein OS=Plasmodium falciparum (isolate 3D7) OX=36329 GN=PF3D7_1324000 PE=4 SV=1	1	4	1459	0	2.7706	4.68e-10	1095	0.00567652	4.68e-10	26.0533	9	1	1
PF3D7_0105300	Q8I288	PFA_0260c	tr|Q8I288|Q8I288_PLAF7 Cyclase-associated protein OS=Plasmodium falciparum (isolate 3D7) OX=36329 GN=PF3D7_0105300 PE=4 SV=1	1	4	162	0	25.705	6.52e-13	736	0.00381545	6.52e-13	27.3669	9	1	1
PF3D7_1111000	Q8IIQ2	PF11_0116	tr|Q8IIQ2|Q8IIQ2_PLAF7 tRNA m5C-methyltransferase, putative OS=Plasmodium falciparum (isolate 3D7) OX=36329 GN=PF3D7_1111000 PE=3 SV=1	1	3	579	0	4.2864	2.81e-11	939	0.00486781	2.81e-11	26.1638	9	1	1
PF3D7_1225600	A0A143ZZZ3;Q8I5G1	PFL1235c	tr|A0A143ZZZ3|A0A143ZZZ3_PLAF7 Uncharacterized protein OS=Plasmodium falciparum (isolate 3D7) OX=36329 GN=PF3D7_1225600 PE=4 SV=1;sp|Q8I5G1|YPF10_PLAF7 Uncharacterized protein PFL1235c OS=Plasmodium falciparum (isolate 3D7) OX=36329 GN=PFL1235c PE=1 SV=1	2	4	781	0	2.5033	4.89e-14	579	0.00300155	4.89e-14	26.0759	9	1	1
PF3D7_1435600	Q8ILA8	PF14_0337	tr|Q8ILA8|Q8ILA8_PLAF7 Uncharacterized protein OS=Plasmodium falciparum (isolate 3D7) OX=36329 GN=PF3D7_1435600 PE=4 SV=1	1	4	1788	0	6.0206	2.42e-10	1056	0.00547434	2.42e-10	25.8417	9	1	1
PF3D7_0414900	C0H4A5	PFD0720w	tr|C0H4A5|C0H4A5_PLAF7 Armadillo-domain containing rhoptry protein OS=Plasmodium falciparum (isolate 3D7) OX=36329 GN=PF3D7_0414900 PE=4 SV=1	1	4	275	0	22.035	3.36e-08	1260	0.00653188	3.36e-08	25.559	9	1	1
PF3D7_0727000	Q8IBI7	PF07_0111	tr|Q8IBI7|Q8IBI7_PLAF7 Vacuolar protein sorting-associated protein 53, putative OS=Plasmodium falciparum (isolate 3D7) OX=36329 GN=PF3D7_0727000 PE=4 SV=1	1	3	1162	0	3.8696	2.45e-11	931	0.00482634	2.45e-11	26.2972	9	1	1
PF3D7_1408400	Q8IM12	PF14_0081	tr|Q8IM12|Q8IM12_PLAF7 FANCJ-like helicase, putative OS=Plasmodium falciparum (isolate 3D7) OX=36329 GN=PF3D7_1408400 PE=4 SV=1	1	7	1160	0	9.1798	1.2e-17	175	0.000907206	1.2e-17	25.1721	9	1	1
PF3D7_1441600	Q8IL54	PF14_0395	tr|Q8IL54|Q8IL54_PLAF7 Acid cluster protein 33 homologue, putative OS=Plasmodium falciparum (isolate 3D7) OX=36329 GN=PF3D7_1441600 PE=4 SV=1	1	4	569	0	37.077	1.65e-17	182	0.000943494	1.65e-17	26.5779	9	1	1
PF3D7_0519600	Q8I3R4	PFE0985w	tr|Q8I3R4|Q8I3R4_PLAF7 Zinc finger protein, putative OS=Plasmodium falciparum (isolate 3D7) OX=36329 GN=PF3D7_0519600 PE=4 SV=1	1	5	755	0	1.746	5.29e-10	1099	0.00569725	5.29e-10	26.2404	9	1	1
PF3D7_0722100	Q8I6Z3	MAL7P1.118	tr|Q8I6Z3|Q8I6Z3_PLAF7 Protein pelota homolog OS=Plasmodium falciparum (isolate 3D7) OX=36329 GN=PF3D7_0722100 PE=3 SV=1	1	2	403	0	1.3136	1.26e-14	496	0.00257128	1.26e-14	26.4108	9	1	1
PF3D7_1369200	A0A5K1K8M3		tr|A0A5K1K8M3|A0A5K1K8M3_PLAF7 Uncharacterized protein OS=Plasmodium falciparum (isolate 3D7) OX=36329 GN=PF3D7_1369200 PE=4 SV=1	1	6	2170	0	2.4642	2.34e-16	286	0.00148263	2.34e-16	25.5824	9	1	1
PF3D7_1443600	Q8IL35	PF14_0414	tr|Q8IL35|Q8IL35_PLAF7 Gamma-tubulin complex component, putative OS=Plasmodium falciparum (isolate 3D7) OX=36329 GN=PF3D7_1443600 PE=4 SV=1	1	5	1898	0	13.018	7.23e-14	612	0.00317263	7.23e-14	25.5781	9	1	1
PF3D7_1464600	Q8IKJ1	PF14_0614	tr|Q8IKJ1|Q8IKJ1_PLAF7 Serine/threonine protein phosphatase UIS2, putative OS=Plasmodium falciparum (isolate 3D7) OX=36329 GN=PF3D7_1464600 PE=4 SV=2	1	7	1442	0	2.154	6.82e-17	237	0.00122862	6.82e-17	25.6519	9	1	1
PF3D7_1107400	Q8IIS8	Rad51	tr|Q8IIS8|Q8IIS8_PLAF7 DNA repair protein RAD51 homolog OS=Plasmodium falciparum (isolate 3D7) OX=36329 GN=PF3D7_1107400 PE=3 SV=2	1	3	350	0	33.088	8.47e-14	622	0.00322447	8.47e-14	3.86279	9	1	1
PF3D7_0314700	O97260	PFC0610c	tr|O97260|O97260_PLAF7 RING finger protein RNF1 OS=Plasmodium falciparum (isolate 3D7) OX=36329 GN=PF3D7_0314700 PE=4 SV=1	1	4	1181	0	44.121	2.74e-14	548	0.00284085	2.74e-14	26.4306	9	1	1
PF3D7_1218900	Q8I5L8	PFL0920c	tr|Q8I5L8|Q8I5L8_PLAF7 WD repeat-containing protein, putative OS=Plasmodium falciparum (isolate 3D7) OX=36329 GN=PF3D7_1218900 PE=4 SV=1	1	4	717	0.00053996	0.31279	2.23e-12	805	0.00417315	2.23e-12	25.8683	9	1	1
PF3D7_0207100	A0A143ZXZ0;O96160	PFB0315w	tr|A0A143ZXZ0|A0A143ZXZ0_PLAF7 Uncharacterized protein OS=Plasmodium falciparum (isolate 3D7) OX=36329 GN=PF3D7_0207100 PE=4 SV=1;sp|O96160|YPF14_PLAF7 Uncharacterized protein PFB0315w OS=Plasmodium falciparum (isolate 3D7) OX=36329 GN=PFB0315w PE=1 SV=2	2	2	1745	0	2.0999	2.72e-11	937	0.00485744	2.72e-11	26.4634	9	1	1
PF3D7_1340700	C0H5G2	Rab11b	tr|C0H5G2|C0H5G2_PLAF7 Ras-related protein Rab-11B OS=Plasmodium falciparum (isolate 3D7) OX=36329 GN=PF3D7_1340700 PE=4 SV=2	1	6	229	0	3.7945	7.76e-17	243	0.00125972	7.76e-17	26.1628	9	1	1
PF3D7_1353400	Q8IDG6	PF13_0278	tr|Q8IDG6|Q8IDG6_PLAF7 Ran-binding protein, putative OS=Plasmodium falciparum (isolate 3D7) OX=36329 GN=PF3D7_1353400 PE=4 SV=1	1	5	1164	0	34.917	2.13e-19	78	0.000404355	2.13e-19	25.968	9	1	1
PF3D7_1329400	Q8IE53	MAL13P1.146	tr|Q8IE53|Q8IE53_PLAF7 AMP deaminase OS=Plasmodium falciparum (isolate 3D7) OX=36329 GN=PF3D7_1329400 PE=4 SV=2	1	4	693	0	39.154	6.27e-09	1214	0.00629342	6.27e-09	26.0773	9	1	1
PF3D7_1323800	A0A5K1K8G8		tr|A0A5K1K8G8|A0A5K1K8G8_PLAF7 Vacuolar protein sorting-associated protein 52, putative OS=Plasmodium falciparum (isolate 3D7) OX=36329 GN=PF3D7_1323800 PE=4 SV=1	1	4	1353	0	0.49264	5.59e-15	437	0.00226542	5.59e-15	25.8741	9	1	1
PF3D7_0415400	Q8I1T3	PFD0745c	tr|Q8I1T3|Q8I1T3_PLAF7 Coatomer subunit zeta OS=Plasmodium falciparum (isolate 3D7) OX=36329 GN=PF3D7_0415400 PE=3 SV=1	1	3	208	0	14.41	1e-06	1323	0.00685848	1e-06	25.8781	9	1	1
PF3D7_1330600	Q8IE20	MAL13P1.164	tr|Q8IE20|Q8IE20_PLAF7 Elongation factor Tu OS=Plasmodium falciparum (isolate 3D7) OX=36329 GN=PF3D7_1330600 PE=4 SV=1	1	3	505	0	9.5913	3.7e-11	950	0.00492483	3.7e-11	26.0336	9	1	1
PF3D7_0106700	Q8I275	AARP2	tr|Q8I275|Q8I275_PLAF7 Small ribosomal subunit assembling AARP2 protein OS=Plasmodium falciparum (isolate 3D7) OX=36329 GN=PF3D7_0106700 PE=4 SV=1	1	3	1434	0	0.54822	1.28e-15	368	0.00190772	1.28e-15	25.86	9	1	1
PF3D7_0612600	C6KSW9	PFF0610c	tr|C6KSW9|C6KSW9_PLAF7 Cytoplasmic tRNA 2-thiolation protein 1 OS=Plasmodium falciparum (isolate 3D7) OX=36329 GN=PF3D7_0612600 PE=3 SV=1	1	3	482	0	9.0611	1.78e-14	521	0.00270088	1.78e-14	25.4882	9	1	1
PF3D7_1008000	Q8IJW3	PF10_0078	tr|Q8IJW3|Q8IJW3_PLAF7 Histone deacetylase 2 OS=Plasmodium falciparum (isolate 3D7) OX=36329 GN=PF3D7_1008000 PE=4 SV=1	1	6	2379	0	1.9315	1.2e-15	363	0.0018818	1.2e-15	25.3869	9	1	1
PF3D7_0730500	Q8IBF4	MAL7P1.167	tr|Q8IBF4|Q8IBF4_PLAF7 Uncharacterized protein OS=Plasmodium falciparum (isolate 3D7) OX=36329 GN=PF3D7_0730500 PE=4 SV=1	1	3	2773	0.001061	-0.013236	6.98e-15	454	0.00235355	6.98e-15	25.8395	9	1	1
PF3D7_1149400	Q8IHM9	PF11_0511	tr|Q8IHM9|Q8IHM9_PLAF7 Uncharacterized protein OS=Plasmodium falciparum (isolate 3D7) OX=36329 GN=PF3D7_1149400 PE=4 SV=2	1	2	209	0	4.1397	8.18e-11	997	0.00516848	8.18e-11	25.7227	9	1	1
PF3D7_1013200	Q8IJR3	PF10_0129	tr|Q8IJR3|Q8IJR3_PLAF7 Uncharacterized protein OS=Plasmodium falciparum (isolate 3D7) OX=36329 GN=PF3D7_1013200 PE=4 SV=1	1	4	1064	0	1.6258	7.17e-10	1117	0.00579057	7.17e-10	25.802	9	1	1
PF3D7_0806000	C0H4S0	PF08_0117	tr|C0H4S0|C0H4S0_PLAF7 AAA family ATPase, putative OS=Plasmodium falciparum (isolate 3D7) OX=36329 GN=PF3D7_0806000 PE=4 SV=1	1	4	1212	0	11.053	6.72e-20	63	0.000326594	6.72e-20	25.9682	9	1	1
PF3D7_0204100	Q9TY98	PFB0190c	tr|Q9TY98|Q9TY98_PLAF7 Sel1 repeat-containing protein, putative OS=Plasmodium falciparum (isolate 3D7) OX=36329 GN=PF3D7_0204100 PE=4 SV=1	1	5	2295	0.0041472	-0.41614	6.99e-22	20	0.000103681	6.99e-22	25.313	9	1	1
PF3D7_0407900	Q9U0K7	PFD0390c	tr|Q9U0K7|Q9U0K7_PLAF7 AAA family ATPase, putative OS=Plasmodium falciparum (isolate 3D7) OX=36329 GN=PF3D7_0407900 PE=3 SV=1	1	3	667	0	0.72794	5.11e-11	970	0.00502851	5.11e-11	26.0717	9	1	1
PF3D7_0920900	Q8I2U4	PFI1025w	tr|Q8I2U4|Q8I2U4_PLAF7 U4/U6 snRNA-associated-splicing factor, putative OS=Plasmodium falciparum (isolate 3D7) OX=36329 GN=PF3D7_0920900 PE=4 SV=1	1	4	480	0	2.4808	5.63e-15	438	0.00227061	5.63e-15	25.7064	9	1	1
PF3D7_0828900	Q8IBC0	PF08_0007	tr|Q8IBC0|Q8IBC0_PLAF7 Uncharacterized protein OS=Plasmodium falciparum (isolate 3D7) OX=36329 GN=PF3D7_0828900 PE=4 SV=1	1	2	185	0	35.201	1.24e-15	366	0.00189736	1.24e-15	26.0232	9	1	1
PF3D7_0520600	C0H4F3	PFE1035c	tr|C0H4F3|C0H4F3_PLAF7 Bis(5-nucleosyl)-tetraphosphatase [asymmetrical] OS=Plasmodium falciparum (isolate 3D7) OX=36329 GN=PF3D7_0520600 PE=1 SV=1	1	3	152	0	5.816	1.73e-10	1040	0.0053914	1.73e-10	25.5172	9	1	1
PF3D7_0908600	Q8I365	PFI0415c	tr|Q8I365|Q8I365_PLAF7 Putative tRNA (cytidine(32)/guanosine(34)-2-O)-methyltransferase OS=Plasmodium falciparum (isolate 3D7) OX=36329 GN=PF3D7_0908600 PE=3 SV=1	1	2	507	0	14.608	3.17e-12	821	0.00425609	3.17e-12	25.5661	9	1	1
PF3D7_0321100	O97287	PFC0930c	tr|O97287|O97287_PLAF7 Uncharacterized protein OS=Plasmodium falciparum (isolate 3D7) OX=36329 GN=PF3D7_0321100 PE=4 SV=1	1	4	1844	0	1.9945	5.21e-11	973	0.00504406	5.21e-11	25.4283	9	1	1
PF3D7_1021800	A0A143ZXM2		tr|A0A143ZXM2|A0A143ZXM2_PLAF7 Schizont egress antigen-1 OS=Plasmodium falciparum (isolate 3D7) OX=36329 GN=PF3D7_1021800 PE=4 SV=1	1	2	2074	0	7.3017	2.15e-09	1166	0.00604458	2.15e-09	26.1561	9	1	1
PF3D7_1334200	A0A5K1K963		tr|A0A5K1K963|A0A5K1K963_PLAF7 Chaperone binding protein, putative OS=Plasmodium falciparum (isolate 3D7) OX=36329 GN=PF3D7_1334200 PE=4 SV=1	1	2	524	0	3.6652	3.86e-06	1343	0.00696216	3.86e-06	25.997	9	1	1
PF3D7_0415300	Q8I1T4	Pfcrk-3	tr|Q8I1T4|Q8I1T4_PLAF7 Cdc2-related protein kinase 3 OS=Plasmodium falciparum (isolate 3D7) OX=36329 GN=PF3D7_0415300 PE=4 SV=1	1	3	1339	0	3.2455	5.37e-13	724	0.00375324	5.37e-13	25.4271	9	1	1
PF3D7_1356800	Q8IDD4	MAL13P1.278	tr|Q8IDD4|Q8IDD4_PLAF7 Serine/threonine protein kinase, putative OS=Plasmodium falciparum (isolate 3D7) OX=36329 GN=PF3D7_1356800 PE=4 SV=1	1	4	4044	0	1.1628	8.34e-07	1320	0.00684292	8.34e-07	25.4763	9	1	1
PF3D7_1017500	Q8IJM4	PF10_0170	tr|Q8IJM4|Q8IJM4_PLAF7 Myosin essential light chain ELC OS=Plasmodium falciparum (isolate 3D7) OX=36329 GN=PF3D7_1017500 PE=4 SV=1	1	3	134	0	15.991	1.4e-09	1149	0.00595645	1.4e-09	25.4305	9	1	1
PF3D7_0310300	C0H469	PFC0430w	tr|C0H469|C0H469_PLAF7 Phosphoglycerate mutase, putative OS=Plasmodium falciparum (isolate 3D7) OX=36329 GN=PF3D7_0310300 PE=4 SV=1	1	5	1165	0	1.3888	3.75e-11	951	0.00493002	3.75e-11	25.5117	9	1	1
PF3D7_1318300	Q8IED3	PF13_0101	tr|Q8IED3|Q8IED3_PLAF7 Uncharacterized protein OS=Plasmodium falciparum (isolate 3D7) OX=36329 GN=PF3D7_1318300 PE=4 SV=1	1	3	1840	0	0.48236	3.36e-10	1072	0.00555728	3.36e-10	25.721	9	1	1
PF3D7_0917000	Q8I2Y3	PFI0830c	tr|Q8I2Y3|Q8I2Y3_PLAF7 Merozoite organizing protein OS=Plasmodium falciparum (isolate 3D7) OX=36329 GN=PF3D7_0917000 PE=4 SV=1	1	4	1826	0	6.1864	9.73e-18	168	0.000870918	9.73e-18	25.5207	9	1	1
PF3D7_1466700	Q8IKH0	PF14_0635	tr|Q8IKH0|Q8IKH0_PLAF7 60S ribosome subunit biogenesis protein NIP7 homolog OS=Plasmodium falciparum (isolate 3D7) OX=36329 GN=PF3D7_1466700 PE=3 SV=2	1	3	179	0	13.5	8.46e-11	999	0.00517885	8.46e-11	25.7014	9	1	1
PF3D7_1451000	Q8IKW6	PF14_0485	tr|Q8IKW6|Q8IKW6_PLAF7 Uncharacterized protein OS=Plasmodium falciparum (isolate 3D7) OX=36329 GN=PF3D7_1451000 PE=4 SV=1	1	4	804	0	8.0834	5.76e-11	977	0.0050648	5.76e-11	25.546	9	1	1
PF3D7_0909600	Q8I356	PFI0465c	tr|Q8I356|Q8I356_PLAF7 Uncharacterized protein OS=Plasmodium falciparum (isolate 3D7) OX=36329 GN=PF3D7_0909600 PE=4 SV=1	1	4	604	0	10.82	4.64e-10	1093	0.00566615	4.64e-10	24.6989	9	1	1
PF3D7_0624200	C6KT78	PFF1165c	tr|C6KT78|C6KT78_PLAF7 SURP motif domain-containing protein OS=Plasmodium falciparum (isolate 3D7) OX=36329 GN=PF3D7_0624200 PE=4 SV=2	1	2	341	0	1.9958	4.9e-17	226	0.00117159	4.9e-17	26.0621	9	1	1
PF3D7_0508100	Q8I422	PFE0400w	tr|Q8I422|Q8I422_PLAF7 SET domain protein, putative OS=Plasmodium falciparum (isolate 3D7) OX=36329 GN=PF3D7_0508100 PE=4 SV=1	1	5	1674	0	6.9207	1.47e-10	1028	0.00532919	1.47e-10	25.1961	9	1	1
PF3D7_1024300	Q8IJG2	PF10_0236	tr|Q8IJG2|Q8IJG2_PLAF7 ATP synthase-associated protein, putative OS=Plasmodium falciparum (isolate 3D7) OX=36329 GN=PF3D7_1024300 PE=4 SV=1	1	2	130	0	9.129	1.74e-10	1041	0.00539658	1.74e-10	25.6591	9	1	1
PF3D7_1032100	Q8IJ85	PF10_0314	tr|Q8IJ85|Q8IJ85_PLAF7 mRNA-decapping enzyme subunit 1, putative OS=Plasmodium falciparum (isolate 3D7) OX=36329 GN=PF3D7_1032100 PE=4 SV=1	1	4	1190	0	5.385	2.69e-12	815	0.00422499	2.69e-12	25.685	9	1	1
PF3D7_1121900	Q8IIE7	PF11_0227	tr|Q8IIE7|Q8IIE7_PLAF7 Serine/threonine protein kinase, putative OS=Plasmodium falciparum (isolate 3D7) OX=36329 GN=PF3D7_1121900 PE=4 SV=1	1	3	525	0	7.1006	2.56e-14	546	0.00283048	2.56e-14	25.5018	9	1	1
PF3D7_0812700	Q8IAW3	PF08_0084	sp|Q8IAW3|RU1C_PLAF7 U1 small nuclear ribonucleoprotein C OS=Plasmodium falciparum (isolate 3D7) OX=36329 GN=PF08_0084 PE=3 SV=1	1	2	235	0	12.873	4.34e-12	837	0.00433904	4.34e-12	25.9669	9	1	1
PF3D7_1013600	Q8IJQ9	PF10_0133	tr|Q8IJQ9|Q8IJQ9_PLAF7 Uncharacterized protein OS=Plasmodium falciparum (isolate 3D7) OX=36329 GN=PF3D7_1013600 PE=4 SV=1	1	2	2238	0.00054466	0.45276	3.71e-18	138	0.000715397	3.71e-18	25.1816	9	1	1
PF3D7_1112500	Q8IIN8	PF11_0526	tr|Q8IIN8|Q8IIN8_PLAF7 RNA transcription, translation and transport factor protein, putative OS=Plasmodium falciparum (isolate 3D7) OX=36329 GN=PF3D7_1112500 PE=4 SV=1	1	3	278	0	9.4651	3.18e-05	1376	0.00713323	3.18e-05	25.1258	9	1	1
PF3D7_1234600	Q8I576	PFL1670c	tr|Q8I576|Q8I576_PLAF7 Protein TOC75, putative OS=Plasmodium falciparum (isolate 3D7) OX=36329 GN=PF3D7_1234600 PE=4 SV=1	1	3	1130	0	2.0647	6.07e-13	733	0.0037999	6.07e-13	24.7473	9	1	1
PF3D7_0406500	C0H491	PFD0320c	tr|C0H491|C0H491_PLAF7 NYN domain-containing protein, putative OS=Plasmodium falciparum (isolate 3D7) OX=36329 GN=PF3D7_0406500 PE=4 SV=2	1	3	3211	0.00054201	0.35558	6.71e-09	1217	0.00630897	6.71e-09	24.514	9	1	1
PF3D7_0218600	O96266	PFB0870w	tr|O96266|O96266_PLAF7 Patatin-like phospholipase, putative OS=Plasmodium falciparum (isolate 3D7) OX=36329 GN=PF3D7_0218600 PE=4 SV=1	1	3	2380	0	4.8068	1.23e-16	264	0.00136859	1.23e-16	24.7119	9	1	1
PF3D7_1142700	Q8IHT8	PF11_0439	tr|Q8IHT8|Q8IHT8_PLAF7 Methyltransferase, putative OS=Plasmodium falciparum (isolate 3D7) OX=36329 GN=PF3D7_1142700 PE=4 SV=1	1	2	615	0	2.4132	6.1e-15	445	0.0023069	6.1e-15	24.9544	9	1	1
PF3D7_1415300	Q8ILU3	PF14_0151	tr|Q8ILU3|Q8ILU3_PLAF7 RNA-binding protein Nova-1, putative OS=Plasmodium falciparum (isolate 3D7) OX=36329 GN=PF3D7_1415300 PE=4 SV=1	1	2	337	0	0.59059	2.44e-15	401	0.0020788	2.44e-15	24.8088	9	1	1
PF3D7_1307700	Q8IEN8	PF13_0041	tr|Q8IEN8|Q8IEN8_PLAF7 TOM1-like protein, putative OS=Plasmodium falciparum (isolate 3D7) OX=36329 GN=PF3D7_1307700 PE=4 SV=1	1	3	1235	0	10.447	1.1e-10	1013	0.00525143	1.1e-10	24.8889	9	1	1
PF3D7_0524900	Q8I3L6	PFE1240w	tr|Q8I3L6|Q8I3L6_PLAF7 S-adenosyl-L-methionine-dependent tRNA 4-demethylwyosine synthase, putative OS=Plasmodium falciparum (isolate 3D7) OX=36329 GN=PF3D7_0524900 PE=4 SV=1	1	2	988	0	3.6181	1.48e-19	72	0.00037325	1.48e-19	24.8037	9	1	1
PF3D7_1302500	Q8IET9	MAL13P1.13	tr|Q8IET9|Q8IET9_PLAF7 Uncharacterized protein OS=Plasmodium falciparum (isolate 3D7) OX=36329 GN=PF3D7_1302500 PE=4 SV=1	1	3	2743	0	5.7368	5.12e-10	1096	0.0056817	5.12e-10	24.4291	9	1	1
PF3D7_1363500	A0A5K1K929		tr|A0A5K1K929|A0A5K1K929_PLAF7 CCR4 domain-containing protein 2, putative OS=Plasmodium falciparum (isolate 3D7) OX=36329 GN=PF3D7_1363500 PE=4 SV=1	1	2	836	0	12.091	2.36e-13	679	0.00351996	2.36e-13	25.2788	9	1	1
