# Supplementary material for: Plasmodium falciparum S-Adenosylmethionine Synthetase Is Essential for Parasite Survival through a Complex Interaction Network with Cytoplasmic and Nuclear Proteins
Source: Microorganisms. 2022 Jul 14;10(7):1419. doi: 10.3390/microorganisms10071419 (PMC9320499; doi:10.3390/microorganisms10071419)
Supplement: Supplementary file 1 [file microorganisms-10-01419-s001.zip › Musabyimana et al-Microorganisms-Table S3.xlsx]

## Sheet: Biological processes
ID	Name	Bgd count	Result count	Result gene list	Pct of bgd	Fold enrichment	Odds ratio	P-value	Benjamini	Bonferroni
GO:0036388	pre-replicative complex assembly	7	7	PF3D7_0527000,PF3D7_0705400,PF3D7_0717500,PF3D7_1211700,PF3D7_1317100,PF3D7_1355100,PF3D7_1417800,	100	4.53	inf	2.52219e-05	0.000700483	0.0398002
GO:0070682	proteasome regulatory particle assembly	7	7	PF3D7_0317800,PF3D7_0413600,PF3D7_0719000,PF3D7_1008400,PF3D7_1130400,PF3D7_1248900,PF3D7_1306400,	100	4.53	inf	2.52219e-05	0.000700483	0.0398002
GO:1902299	pre-replicative complex assembly involved in cell cycle DNA replication	6	6	PF3D7_0527000,PF3D7_0705400,PF3D7_1211700,PF3D7_1317100,PF3D7_1355100,PF3D7_1417800,	100	4.53	inf	0.000114714	0.00237649	0.181018
GO:0090114	COPII-coated vesicle budding	5	5	PF3D7_0214100,PF3D7_0405100,PF3D7_0822600,PF3D7_1230700,PF3D7_1361100,	100	4.53	inf	0.000521358	0.00791061	0.822703
GO:0006656	phosphatidylcholine biosynthetic process	5	5	PF3D7_1123100,PF3D7_1124600,PF3D7_1316600,PF3D7_1343000,PF3D7_1401800,	100	4.53	inf	0.000521358	0.00791061	0.822703
GO:0046470	phosphatidylcholine metabolic process	5	5	PF3D7_1123100,PF3D7_1124600,PF3D7_1316600,PF3D7_1343000,PF3D7_1401800,	100	4.53	inf	0.000521358	0.00791061	0.822703
GO:0045898	regulation of RNA polymerase II transcription preinitiation complex assembly	4	4	PF3D7_0413600,PF3D7_1130400,PF3D7_1306400,PF3D7_1311500,	100	4.53	inf	0.00236777	0.0233522	1
GO:0045899	positive regulation of RNA polymerase II transcription preinitiation complex assembly	4	4	PF3D7_0413600,PF3D7_1130400,PF3D7_1306400,PF3D7_1311500,	100	4.53	inf	0.00236777	0.0233522	1
GO:2000144	positive regulation of DNA-templated transcription, initiation	4	4	PF3D7_0413600,PF3D7_1130400,PF3D7_1306400,PF3D7_1311500,	100	4.53	inf	0.00236777	0.0233522	1
GO:0035459	vesicle cargo loading	4	4	PF3D7_0214100,PF3D7_0405100,PF3D7_0822600,PF3D7_1361100,	100	4.53	inf	0.00236777	0.0233522	1
GO:0034724	DNA replication-independent chromatin organization	4	4	PF3D7_0501800,PF3D7_0517400,PF3D7_1205600,PF3D7_1224500,	100	4.53	inf	0.00236777	0.0233522	1
GO:0032968	positive regulation of transcription elongation from RNA polymerase II promoter	4	4	PF3D7_0415300,PF3D7_0517400,PF3D7_0520700,PF3D7_1406200,	100	4.53	inf	0.00236777	0.0233522	1
GO:2000142	regulation of DNA-templated transcription, initiation	4	4	PF3D7_0413600,PF3D7_1130400,PF3D7_1306400,PF3D7_1311500,	100	4.53	inf	0.00236777	0.0233522	1
GO:0060260	regulation of transcription initiation from RNA polymerase II promoter	4	4	PF3D7_0413600,PF3D7_1130400,PF3D7_1306400,PF3D7_1311500,	100	4.53	inf	0.00236777	0.0233522	1
GO:0060261	positive regulation of transcription initiation from RNA polymerase II promoter	4	4	PF3D7_0413600,PF3D7_1130400,PF3D7_1306400,PF3D7_1311500,	100	4.53	inf	0.00236777	0.0233522	1
GO:0009065	glutamine family amino acid catabolic process	4	4	PF3D7_0608800,PF3D7_0802000,PF3D7_0906500,PF3D7_1308200,	100	4.53	inf	0.00236777	0.0233522	1
GO:0090110	COPII-coated vesicle cargo loading	4	4	PF3D7_0214100,PF3D7_0405100,PF3D7_0822600,PF3D7_1361100,	100	4.53	inf	0.00236777	0.0233522	1
GO:1902292	cell cycle DNA replication initiation	4	4	PF3D7_0411900,PF3D7_0527000,PF3D7_1317100,PF3D7_1417800,	100	4.53	inf	0.00236777	0.0233522	1
GO:1902315	nuclear cell cycle DNA replication initiation	4	4	PF3D7_0411900,PF3D7_0527000,PF3D7_1317100,PF3D7_1417800,	100	4.53	inf	0.00236777	0.0233522	1
GO:1902975	mitotic DNA replication initiation	4	4	PF3D7_0411900,PF3D7_0527000,PF3D7_1317100,PF3D7_1417800,	100	4.53	inf	0.00236777	0.0233522	1
GO:0046654	tetrahydrofolate biosynthetic process	4	4	PF3D7_0417200,PF3D7_0810800,PF3D7_0922400,PF3D7_1224000,	100	4.53	inf	0.00236777	0.0233522	1
GO:0043928	exonucleolytic catabolism of deadenylated mRNA	4	4	PF3D7_0410400,PF3D7_0811300,PF3D7_1307000,PF3D7_1364500,	100	4.53	inf	0.00236777	0.0233522	1
GO:0010499	proteasomal ubiquitin-independent protein catabolic process	14	13	PF3D7_0108000,PF3D7_0317000,PF3D7_0608500,PF3D7_0727400,PF3D7_0803800,PF3D7_0807500,PF3D7_0931800,PF3D7_1011400,PF3D7_1328100,PF3D7_1353800,PF3D7_1353900,PF3D7_1470900,PF3D7_1474800,	92.9	4.2	46.42	3.13043e-08	2.3523e-06	4.93982e-05
GO:0043248	proteasome assembly	13	12	PF3D7_0317800,PF3D7_0413600,PF3D7_0528000,PF3D7_0719000,PF3D7_0723600,PF3D7_0807800,PF3D7_1008400,PF3D7_1030500,PF3D7_1130400,PF3D7_1248900,PF3D7_1306400,PF3D7_1402300,	92.3	4.18	42.81	1.32965e-07	8.39278e-06	0.000209819
GO:0044786	cell cycle DNA replication	9	8	PF3D7_0411900,PF3D7_0527000,PF3D7_0705400,PF3D7_1107400,PF3D7_1211700,PF3D7_1317100,PF3D7_1355100,PF3D7_1417800,	88.9	4.03	28.43	4.01402e-05	0.000978187	0.0633413
GO:0033260	nuclear DNA replication	9	8	PF3D7_0411900,PF3D7_0527000,PF3D7_0705400,PF3D7_1107400,PF3D7_1211700,PF3D7_1317100,PF3D7_1355100,PF3D7_1417800,	88.9	4.03	28.43	4.01402e-05	0.000978187	0.0633413
GO:0009127	purine nucleoside monophosphate biosynthetic process	8	7	PF3D7_0206700,PF3D7_0520600,PF3D7_0920800,PF3D7_1012400,PF3D7_1012600,PF3D7_1029600,PF3D7_1329400,	87.5	3.96	24.85	0.000162985	0.00299059	0.257191
GO:1902969	mitotic DNA replication	7	6	PF3D7_0411900,PF3D7_0527000,PF3D7_1107400,PF3D7_1317100,PF3D7_1355100,PF3D7_1417800,	85.7	3.88	21.28	0.000651665	0.00894198	1
GO:0006272	leading strand elongation	7	6	PF3D7_0411900,PF3D7_0630300,PF3D7_1226600,PF3D7_1241700,PF3D7_1361900,PF3D7_1463200,	85.7	3.88	21.28	0.000651665	0.00894198	1
GO:0006368	transcription elongation from RNA polymerase II promoter	7	6	PF3D7_0110400,PF3D7_0205400,PF3D7_0517400,PF3D7_0520700,PF3D7_0610900,PF3D7_1406200,	85.7	3.88	21.28	0.000651665	0.00894198	1
GO:0000387	spliceosomal snRNP assembly	13	11	PF3D7_0218500,PF3D7_0405400,PF3D7_0515000,PF3D7_0812700,PF3D7_0822300,PF3D7_0909800,PF3D7_1110200,PF3D7_1125500,PF3D7_1126900,PF3D7_1305400,PF3D7_1350200,	84.6	3.83	19.6	2.91623e-06	0.000117012	0.0046018
GO:0034504	protein localization to nucleus	12	10	PF3D7_0419600,PF3D7_0524000,PF3D7_0627700,PF3D7_0706000,PF3D7_0812400,PF3D7_0815200,PF3D7_0932800,PF3D7_1117700,PF3D7_1456700,PF3D7_1473700,	83.3	3.77	17.8	1.12994e-05	0.000356608	0.0178304
GO:0006606	protein import into nucleus	12	10	PF3D7_0419600,PF3D7_0524000,PF3D7_0627700,PF3D7_0706000,PF3D7_0812400,PF3D7_0815200,PF3D7_0932800,PF3D7_1117700,PF3D7_1456700,PF3D7_1473700,	83.3	3.77	17.8	1.12994e-05	0.000356608	0.0178304
GO:0051170	import into nucleus	12	10	PF3D7_0419600,PF3D7_0524000,PF3D7_0627700,PF3D7_0706000,PF3D7_0812400,PF3D7_0815200,PF3D7_0932800,PF3D7_1117700,PF3D7_1456700,PF3D7_1473700,	83.3	3.77	17.8	1.12994e-05	0.000356608	0.0178304
GO:0140029	exocytic process	6	5	PF3D7_0216400,PF3D7_0502000,PF3D7_0613700,PF3D7_1034000,PF3D7_1309700,	83.3	3.77	17.72	0.00255458	0.0241385	1
GO:0000018	regulation of DNA recombination	6	5	PF3D7_0407900,PF3D7_0505500,PF3D7_0934100,PF3D7_1408400,PF3D7_1427500,	83.3	3.77	17.72	0.00255458	0.0241385	1
GO:0042278	purine nucleoside metabolic process	6	5	PF3D7_0513300,PF3D7_1012400,PF3D7_1029600,PF3D7_1033100,PF3D7_1325100,	83.3	3.77	17.72	0.00255458	0.0241385	1
GO:0009263	deoxyribonucleotide biosynthetic process	6	5	PF3D7_0417200,PF3D7_1015800,PF3D7_1127100,PF3D7_1405600,PF3D7_1437200,	83.3	3.77	17.72	0.00255458	0.0241385	1
GO:0034427	nuclear-transcribed mRNA catabolic process, exonucleolytic, 3'-5'	6	5	PF3D7_0209200,PF3D7_0410400,PF3D7_0909900,PF3D7_1307000,PF3D7_1364500,	83.3	3.77	17.72	0.00255458	0.0241385	1
GO:0006904	vesicle docking involved in exocytosis	6	5	PF3D7_0216400,PF3D7_0502000,PF3D7_0613700,PF3D7_1034000,PF3D7_1309700,	83.3	3.77	17.72	0.00255458	0.0241385	1
GO:0022616	DNA strand elongation	15	12	PF3D7_0308000,PF3D7_0411900,PF3D7_0527000,PF3D7_0630300,PF3D7_0705400,PF3D7_1111100,PF3D7_1211700,PF3D7_1226600,PF3D7_1241700,PF3D7_1317100,PF3D7_1361900,PF3D7_1463200,	80	3.62	14.26	2.96607e-06	0.000117012	0.00468046
GO:0006271	DNA strand elongation involved in DNA replication	15	12	PF3D7_0308000,PF3D7_0411900,PF3D7_0527000,PF3D7_0630300,PF3D7_0705400,PF3D7_1111100,PF3D7_1211700,PF3D7_1226600,PF3D7_1241700,PF3D7_1317100,PF3D7_1361900,PF3D7_1463200,	80	3.62	14.26	2.96607e-06	0.000117012	0.00468046
GO:0006334	nucleosome assembly	10	8	PF3D7_0110700,PF3D7_0919000,PF3D7_1105000,PF3D7_1105100,PF3D7_1203700,PF3D7_1205600,PF3D7_1224500,PF3D7_1433300,	80	3.62	14.21	0.000161645	0.00299059	0.255076
GO:0034475	U4 snRNA 3'-end processing	5	4	PF3D7_0209200,PF3D7_0410400,PF3D7_1307000,PF3D7_1364500,	80	3.62	14.16	0.00975344	0.0662362	1
GO:0032786	positive regulation of DNA-templated transcription, elongation	5	4	PF3D7_0415300,PF3D7_0517400,PF3D7_0520700,PF3D7_1406200,	80	3.62	14.16	0.00975344	0.0662362	1
GO:0031125	rRNA 3'-end processing	5	4	PF3D7_0410400,PF3D7_1144000,PF3D7_1307000,PF3D7_1364500,	80	3.62	14.16	0.00975344	0.0662362	1
GO:0043101	purine-containing compound salvage	5	4	PF3D7_1012400,PF3D7_1029600,PF3D7_1325100,PF3D7_1329400,	80	3.62	14.16	0.00975344	0.0662362	1
GO:0098876	vesicle-mediated transport to the plasma membrane	5	4	PF3D7_0103100,PF3D7_0303000,PF3D7_0304200,PF3D7_1451000,	80	3.62	14.16	0.00975344	0.0662362	1
GO:0042451	purine nucleoside biosynthetic process	5	4	PF3D7_1012400,PF3D7_1029600,PF3D7_1033100,PF3D7_1325100,	80	3.62	14.16	0.00975344	0.0662362	1
GO:0034661	ncRNA catabolic process	9	7	PF3D7_0209200,PF3D7_0410400,PF3D7_0722100,PF3D7_1307000,PF3D7_1340100,PF3D7_1359300,PF3D7_1364500,	77.8	3.52	12.42	0.000592943	0.00835415	0.935664
GO:0009119	ribonucleoside metabolic process	9	7	PF3D7_0512700,PF3D7_0513300,PF3D7_0717400,PF3D7_1012400,PF3D7_1029600,PF3D7_1033100,PF3D7_1325100,	77.8	3.52	12.42	0.000592943	0.00835415	0.935664
GO:0009168	purine ribonucleoside monophosphate biosynthetic process	9	7	PF3D7_0206700,PF3D7_0520600,PF3D7_0920800,PF3D7_1012400,PF3D7_1012600,PF3D7_1029600,PF3D7_1329400,	77.8	3.52	12.42	0.000592943	0.00835415	0.935664
GO:0009126	purine nucleoside monophosphate metabolic process	9	7	PF3D7_0206700,PF3D7_0520600,PF3D7_0920800,PF3D7_1012400,PF3D7_1012600,PF3D7_1029600,PF3D7_1329400,	77.8	3.52	12.42	0.000592943	0.00835415	0.935664
GO:0016075	rRNA catabolic process	9	7	PF3D7_0209200,PF3D7_0410400,PF3D7_0722100,PF3D7_1307000,PF3D7_1340100,PF3D7_1359300,PF3D7_1364500,	77.8	3.52	12.42	0.000592943	0.00835415	0.935664
GO:1901659	glycosyl compound biosynthetic process	9	7	PF3D7_0512700,PF3D7_0524900,PF3D7_0717400,PF3D7_1012400,PF3D7_1029600,PF3D7_1033100,PF3D7_1325100,	77.8	3.52	12.42	0.000592943	0.00835415	0.935664
GO:0007264	small GTPase mediated signal transduction	12	9	PF3D7_0106800,PF3D7_0211200,PF3D7_0711500,PF3D7_0807300,PF3D7_1007200,PF3D7_1038100,PF3D7_1242800,PF3D7_1320600,PF3D7_1451000,	75	3.4	10.67	0.000138593	0.00260357	0.2187
GO:0034404	nucleobase-containing small molecule biosynthetic process	8	6	PF3D7_0512700,PF3D7_0717400,PF3D7_1012400,PF3D7_1029600,PF3D7_1033100,PF3D7_1325100,	75	3.4	10.64	0.0021177	0.0233522	1
GO:0000291	nuclear-transcribed mRNA catabolic process, exonucleolytic	8	6	PF3D7_0209200,PF3D7_0410400,PF3D7_0811300,PF3D7_0909900,PF3D7_1307000,PF3D7_1364500,	75	3.4	10.64	0.0021177	0.0233522	1
GO:0042455	ribonucleoside biosynthetic process	8	6	PF3D7_0512700,PF3D7_0717400,PF3D7_1012400,PF3D7_1029600,PF3D7_1033100,PF3D7_1325100,	75	3.4	10.64	0.0021177	0.0233522	1
GO:0009163	nucleoside biosynthetic process	8	6	PF3D7_0512700,PF3D7_0717400,PF3D7_1012400,PF3D7_1029600,PF3D7_1033100,PF3D7_1325100,	75	3.4	10.64	0.0021177	0.0233522	1
GO:0006354	DNA-templated transcription, elongation	8	6	PF3D7_0110400,PF3D7_0205400,PF3D7_0517400,PF3D7_0520700,PF3D7_0610900,PF3D7_1406200,	75	3.4	10.64	0.0021177	0.0233522	1
GO:0031497	chromatin assembly	15	11	PF3D7_0110700,PF3D7_0501800,PF3D7_0919000,PF3D7_1104200,PF3D7_1105000,PF3D7_1105100,PF3D7_1203700,PF3D7_1205600,PF3D7_1224500,PF3D7_1329300,PF3D7_1433300,	73.3	3.32	9.79	3.26619e-05	0.000859009	0.0515405
GO:0002181	cytoplasmic translation	37	27	PF3D7_0212300,PF3D7_0415900,PF3D7_0418200,PF3D7_0503800,PF3D7_0516900,PF3D7_0517700,PF3D7_0529500,PF3D7_0716800,PF3D7_0815600,PF3D7_0821700,PF3D7_0907600,PF3D7_0908600,PF3D7_1007900,PF3D7_1010600,PF3D7_1026800,PF3D7_1103100,PF3D7_1123400,PF3D7_1130200,PF3D7_1142600,PF3D7_1206200,PF3D7_1212700,PF3D7_1244800,PF3D7_1323100,PF3D7_1338200,PF3D7_1358900,PF3D7_1410600,PF3D7_1468700,	73	3.3	9.75	5.05675e-11	7.97955e-09	7.97955e-08
GO:1901657	glycosyl compound metabolic process	11	8	PF3D7_0512700,PF3D7_0513300,PF3D7_0524900,PF3D7_0717400,PF3D7_1012400,PF3D7_1029600,PF3D7_1033100,PF3D7_1325100,	72.7	3.29	9.47	0.000477706	0.00753819	0.753819
GO:0034728	nucleosome organization	18	13	PF3D7_0110700,PF3D7_0628600,PF3D7_0719300,PF3D7_0820000,PF3D7_0919000,PF3D7_1104200,PF3D7_1105000,PF3D7_1105100,PF3D7_1203700,PF3D7_1205600,PF3D7_1224500,PF3D7_1406200,PF3D7_1433300,	72.2	3.27	9.27	7.74839e-06	0.000265803	0.012227
GO:0045944	positive regulation of transcription by RNA polymerase II	14	10	PF3D7_0413600,PF3D7_0415300,PF3D7_0517400,PF3D7_0520700,PF3D7_0611400,PF3D7_1107500,PF3D7_1130400,PF3D7_1306400,PF3D7_1311500,PF3D7_1406200,	71.4	3.23	8.89	0.000110139	0.00234864	0.173799
GO:0000184	nuclear-transcribed mRNA catabolic process, nonsense-mediated decay	7	5	PF3D7_0909900,PF3D7_1005500,PF3D7_1010200,PF3D7_1352700,PF3D7_1415400,	71.4	3.23	8.86	0.00731187	0.0574036	1
GO:0009396	folic acid-containing compound biosynthetic process	7	5	PF3D7_0417200,PF3D7_0810800,PF3D7_0922400,PF3D7_1224000,PF3D7_1324800,	71.4	3.23	8.86	0.00731187	0.0574036	1
GO:0043486	histone exchange	7	5	PF3D7_0628600,PF3D7_0719300,PF3D7_0820000,PF3D7_1205600,PF3D7_1224500,	71.4	3.23	8.86	0.00731187	0.0574036	1
GO:0043094	cellular metabolic compound salvage	7	5	PF3D7_0629100,PF3D7_1012400,PF3D7_1029600,PF3D7_1325100,PF3D7_1329400,	71.4	3.23	8.86	0.00731187	0.0574036	1
GO:0046129	purine ribonucleoside biosynthetic process	7	5	PF3D7_0520600,PF3D7_1012400,PF3D7_1029600,PF3D7_1033100,PF3D7_1325100,	71.4	3.23	8.86	0.00731187	0.0574036	1
GO:0065004	protein-DNA complex assembly	24	17	PF3D7_0110700,PF3D7_0527000,PF3D7_0705400,PF3D7_0717500,PF3D7_0919000,PF3D7_0929000,PF3D7_1105000,PF3D7_1105100,PF3D7_1107400,PF3D7_1203700,PF3D7_1205600,PF3D7_1211700,PF3D7_1224500,PF3D7_1317100,PF3D7_1355100,PF3D7_1417800,PF3D7_1433300,	70.8	3.21	8.69	4.42026e-07	2.5834e-05	0.000697517
GO:0002183	cytoplasmic translational initiation	17	12	PF3D7_0418200,PF3D7_0517700,PF3D7_0529500,PF3D7_0716800,PF3D7_0815600,PF3D7_0907600,PF3D7_1007900,PF3D7_1010600,PF3D7_1206200,PF3D7_1212700,PF3D7_1410600,PF3D7_1468700,	70.6	3.2	8.55	2.57465e-05	0.000700483	0.040628
GO:0009064	glutamine family amino acid metabolic process	17	12	PF3D7_0309500,PF3D7_0608800,PF3D7_0802000,PF3D7_0906500,PF3D7_0922400,PF3D7_0922600,PF3D7_1012600,PF3D7_1308200,PF3D7_1324000,PF3D7_1357900,PF3D7_1410200,PF3D7_1416500,	70.6	3.2	8.55	2.57465e-05	0.000700483	0.040628
GO:0006900	vesicle budding from membrane	10	7	PF3D7_0214100,PF3D7_0405100,PF3D7_0804900,PF3D7_0822600,PF3D7_1230700,PF3D7_1244600,PF3D7_1361100,	70	3.17	8.28	0.0015993	0.0189752	1
GO:0006541	glutamine metabolic process	10	7	PF3D7_0309500,PF3D7_0922400,PF3D7_0922600,PF3D7_1012600,PF3D7_1308200,PF3D7_1324000,PF3D7_1410200,	70	3.17	8.28	0.0015993	0.0189752	1
GO:0009116	nucleoside metabolic process	10	7	PF3D7_0512700,PF3D7_0513300,PF3D7_0717400,PF3D7_1012400,PF3D7_1029600,PF3D7_1033100,PF3D7_1325100,	70	3.17	8.28	0.0015993	0.0189752	1
GO:0046128	purine ribonucleoside metabolic process	10	7	PF3D7_0406100,PF3D7_0513300,PF3D7_1012400,PF3D7_1029600,PF3D7_1033100,PF3D7_1311900,PF3D7_1325100,	70	3.17	8.28	0.0015993	0.0189752	1
GO:0009167	purine ribonucleoside monophosphate metabolic process	13	9	PF3D7_0206700,PF3D7_0406100,PF3D7_0520600,PF3D7_0920800,PF3D7_1012400,PF3D7_1012600,PF3D7_1029600,PF3D7_1311900,PF3D7_1329400,	69.2	3.14	8.0	0.000362131	0.00607917	0.571442
GO:0006891	intra-Golgi vesicle-mediated transport	16	11	PF3D7_0303000,PF3D7_0415400,PF3D7_0606700,PF3D7_0808400,PF3D7_0905900,PF3D7_1130500,PF3D7_1144900,PF3D7_1145100,PF3D7_1335700,PF3D7_1429800,PF3D7_1465100,	68.8	3.11	7.83	8.36693e-05	0.00188614	0.13203
GO:0071824	protein-DNA complex subunit organization	33	22	PF3D7_0110700,PF3D7_0527000,PF3D7_0628600,PF3D7_0705400,PF3D7_0717500,PF3D7_0719300,PF3D7_0820000,PF3D7_0919000,PF3D7_0929000,PF3D7_1104200,PF3D7_1105000,PF3D7_1105100,PF3D7_1107400,PF3D7_1203700,PF3D7_1205600,PF3D7_1211700,PF3D7_1224500,PF3D7_1317100,PF3D7_1355100,PF3D7_1406200,PF3D7_1417800,PF3D7_1433300,	66.7	3.02	7.18	4.69604e-08	3.22189e-06	7.41035e-05
GO:0016573	histone acetylation	18	12	PF3D7_0110500,PF3D7_0416400,PF3D7_0627800,PF3D7_0628600,PF3D7_0704400,PF3D7_0823300,PF3D7_1008100,PF3D7_1103600,PF3D7_1106000,PF3D7_1224500,PF3D7_1362200,PF3D7_1422800,	66.7	3.02	7.13	6.17428e-05	0.0014328	0.0974301
GO:0006270	DNA replication initiation	15	10	PF3D7_0403700,PF3D7_0411900,PF3D7_0527000,PF3D7_0705300,PF3D7_0705400,PF3D7_1211700,PF3D7_1317100,PF3D7_1355100,PF3D7_1417800,PF3D7_1463300,	66.7	3.02	7.11	0.000265093	0.00459688	0.418316
GO:0001732	formation of cytoplasmic translation initiation complex	12	8	PF3D7_0418200,PF3D7_0517700,PF3D7_0716800,PF3D7_0815600,PF3D7_1007900,PF3D7_1010600,PF3D7_1206200,PF3D7_1212700,	66.7	3.02	7.1	0.00115593	0.0145925	1
GO:0007035	vacuolar acidification	9	6	PF3D7_0406100,PF3D7_1306600,PF3D7_1311900,PF3D7_1323200,PF3D7_1341900,PF3D7_1464700,	66.7	3.02	7.09	0.00516723	0.0430053	1
GO:0009262	deoxyribonucleotide metabolic process	9	6	PF3D7_0417200,PF3D7_1015800,PF3D7_1127100,PF3D7_1239000,PF3D7_1405600,PF3D7_1437200,	66.7	3.02	7.09	0.00516723	0.0430053	1
GO:0071025	RNA surveillance	9	6	PF3D7_0205400,PF3D7_0209200,PF3D7_0410400,PF3D7_0722100,PF3D7_1307000,PF3D7_1364500,	66.7	3.02	7.09	0.00516723	0.0430053	1
GO:0051650	establishment of vesicle localization	9	6	PF3D7_0613900,PF3D7_0804900,PF3D7_1229800,PF3D7_1244600,PF3D7_1329100,PF3D7_1342600,	66.7	3.02	7.09	0.00516723	0.0430053	1
GO:0032784	regulation of DNA-templated transcription, elongation	9	6	PF3D7_0415300,PF3D7_0517400,PF3D7_0520700,PF3D7_0610900,PF3D7_0714500,PF3D7_1406200,	66.7	3.02	7.09	0.00516723	0.0430053	1
GO:0006760	folic acid-containing compound metabolic process	9	6	PF3D7_0417200,PF3D7_0810800,PF3D7_0922400,PF3D7_1224000,PF3D7_1235600,PF3D7_1324800,	66.7	3.02	7.09	0.00516723	0.0430053	1
GO:0051452	intracellular pH reduction	9	6	PF3D7_0406100,PF3D7_1306600,PF3D7_1311900,PF3D7_1323200,PF3D7_1341900,PF3D7_1464700,	66.7	3.02	7.09	0.00516723	0.0430053	1
GO:0045851	pH reduction	9	6	PF3D7_0406100,PF3D7_1306600,PF3D7_1311900,PF3D7_1323200,PF3D7_1341900,PF3D7_1464700,	66.7	3.02	7.09	0.00516723	0.0430053	1
GO:0051648	vesicle localization	9	6	PF3D7_0613900,PF3D7_0804900,PF3D7_1229800,PF3D7_1244600,PF3D7_1329100,PF3D7_1342600,	66.7	3.02	7.09	0.00516723	0.0430053	1
GO:0006268	DNA unwinding involved in DNA replication	11	7	PF3D7_0409600,PF3D7_0705400,PF3D7_0904800,PF3D7_1317100,PF3D7_1347100,PF3D7_1355100,PF3D7_1417800,	63.6	2.88	6.21	0.0035621	0.0324913	1
GO:0006475	internal protein amino acid acetylation	19	12	PF3D7_0110500,PF3D7_0416400,PF3D7_0627800,PF3D7_0628600,PF3D7_0704400,PF3D7_0823300,PF3D7_1008100,PF3D7_1103600,PF3D7_1106000,PF3D7_1224500,PF3D7_1362200,PF3D7_1422800,	63.2	2.86	6.11	0.000134017	0.00254794	0.211479
GO:0018394	peptidyl-lysine acetylation	19	12	PF3D7_0110500,PF3D7_0416400,PF3D7_0627800,PF3D7_0628600,PF3D7_0704400,PF3D7_0823300,PF3D7_1008100,PF3D7_1103600,PF3D7_1106000,PF3D7_1224500,PF3D7_1362200,PF3D7_1422800,	63.2	2.86	6.11	0.000134017	0.00254794	0.211479
GO:0018393	internal peptidyl-lysine acetylation	19	12	PF3D7_0110500,PF3D7_0416400,PF3D7_0627800,PF3D7_0628600,PF3D7_0704400,PF3D7_0823300,PF3D7_1008100,PF3D7_1103600,PF3D7_1106000,PF3D7_1224500,PF3D7_1362200,PF3D7_1422800,	63.2	2.86	6.11	0.000134017	0.00254794	0.211479
GO:0009124	nucleoside monophosphate biosynthetic process	16	10	PF3D7_0206700,PF3D7_0417200,PF3D7_0512700,PF3D7_0520600,PF3D7_0920800,PF3D7_1012400,PF3D7_1012600,PF3D7_1029600,PF3D7_1127100,PF3D7_1329400,	62.5	2.83	5.93	0.000567465	0.00835415	0.895459
GO:0007033	vacuole organization	16	10	PF3D7_0502000,PF3D7_0505100,PF3D7_0515300,PF3D7_1012900,PF3D7_1015900,PF3D7_1126100,PF3D7_1239900,PF3D7_1309700,PF3D7_1430400,PF3D7_1457500,	62.5	2.83	5.93	0.000567465	0.00835415	0.895459
GO:0006333	chromatin assembly or disassembly	18	11	PF3D7_0110700,PF3D7_0501800,PF3D7_0919000,PF3D7_1104200,PF3D7_1105000,PF3D7_1105100,PF3D7_1203700,PF3D7_1205600,PF3D7_1224500,PF3D7_1329300,PF3D7_1433300,	61.1	2.77	5.59	0.00039119	0.00640641	0.617297
GO:0006446	regulation of translational initiation	15	9	PF3D7_0422700,PF3D7_0716800,PF3D7_0828500,PF3D7_0912800,PF3D7_1013900,PF3D7_1206200,PF3D7_1212700,PF3D7_1250600,PF3D7_1468700,	60	2.72	5.33	0.00164165	0.0193323	1
GO:0051169	nuclear transport	34	20	PF3D7_0205400,PF3D7_0302900,PF3D7_0419600,PF3D7_0524000,PF3D7_0627700,PF3D7_0706000,PF3D7_0729300,PF3D7_0812400,PF3D7_0815200,PF3D7_0910100,PF3D7_0932800,PF3D7_1117700,PF3D7_1202600,PF3D7_1315900,PF3D7_1332800,PF3D7_1368200,PF3D7_1422400,PF3D7_1456700,PF3D7_1459000,PF3D7_1473700,	58.8	2.66	5.12	3.60702e-06	0.000135521	0.00569188
GO:0006913	nucleocytoplasmic transport	34	20	PF3D7_0205400,PF3D7_0302900,PF3D7_0419600,PF3D7_0524000,PF3D7_0627700,PF3D7_0706000,PF3D7_0729300,PF3D7_0812400,PF3D7_0815200,PF3D7_0910100,PF3D7_0932800,PF3D7_1117700,PF3D7_1202600,PF3D7_1315900,PF3D7_1332800,PF3D7_1368200,PF3D7_1422400,PF3D7_1456700,PF3D7_1459000,PF3D7_1473700,	58.8	2.66	5.12	3.60702e-06	0.000135521	0.00569188
GO:0006338	chromatin remodeling	17	10	PF3D7_0624600,PF3D7_0628600,PF3D7_0719300,PF3D7_0820000,PF3D7_1104200,PF3D7_1106000,PF3D7_1248700,PF3D7_1362200,PF3D7_1422800,PF3D7_1433300,	58.8	2.66	5.08	0.0011069	0.0142007	1
GO:0043628	ncRNA 3'-end processing	17	10	PF3D7_0209200,PF3D7_0410400,PF3D7_0513200,PF3D7_1120500,PF3D7_1144000,PF3D7_1307000,PF3D7_1364500,PF3D7_1407100,PF3D7_1417500,PF3D7_1465300,	58.8	2.66	5.08	0.0011069	0.0142007	1
GO:0009123	nucleoside monophosphate metabolic process	17	10	PF3D7_0206700,PF3D7_0417200,PF3D7_0512700,PF3D7_0520600,PF3D7_0920800,PF3D7_1012400,PF3D7_1012600,PF3D7_1029600,PF3D7_1127100,PF3D7_1329400,	58.8	2.66	5.08	0.0011069	0.0142007	1
GO:0006473	protein acetylation	24	14	PF3D7_0110500,PF3D7_0416400,PF3D7_0627800,PF3D7_0628600,PF3D7_0704400,PF3D7_0823300,PF3D7_1003300,PF3D7_1008100,PF3D7_1103600,PF3D7_1106000,PF3D7_1224500,PF3D7_1244100,PF3D7_1362200,PF3D7_1422800,	58.3	2.64	4.99	0.000124414	0.00245406	0.196325
GO:0000288	nuclear-transcribed mRNA catabolic process, deadenylation-dependent decay	12	7	PF3D7_0410400,PF3D7_0519500,PF3D7_0811300,PF3D7_1032100,PF3D7_1307000,PF3D7_1364500,PF3D7_1417200,	58.3	2.64	4.97	0.00693075	0.0557996	1
GO:0006351	transcription, DNA-templated	38	22	PF3D7_0110400,PF3D7_0215700,PF3D7_0303300,PF3D7_0318200,PF3D7_0501800,PF3D7_0509400,PF3D7_0517400,PF3D7_0610900,PF3D7_0708100,PF3D7_0714500,PF3D7_0923000,PF3D7_1015900,PF3D7_1104700,PF3D7_1134700,PF3D7_1143300,PF3D7_1206600,PF3D7_1213700,PF3D7_1304900,PF3D7_1329000,PF3D7_1364800,PF3D7_1415200,PF3D7_1458800,	57.9	2.62	4.93	1.69397e-06	8.10027e-05	0.00267309
GO:0051656	establishment of organelle localization	21	12	PF3D7_0302900,PF3D7_0316500,PF3D7_0613900,PF3D7_0729300,PF3D7_0804900,PF3D7_1117700,PF3D7_1229800,PF3D7_1244600,PF3D7_1329100,PF3D7_1332800,PF3D7_1342600,PF3D7_1368200,	57.1	2.59	4.75	0.000500564	0.00782069	0.78989
GO:0000245	spliceosomal complex assembly	14	8	PF3D7_0302100,PF3D7_0403700,PF3D7_0624200,PF3D7_0812700,PF3D7_1220100,PF3D7_1231500,PF3D7_1234800,PF3D7_1317000,	57.1	2.59	4.73	0.00457307	0.0403145	1
GO:0006890	retrograde vesicle-mediated transport, Golgi to endoplasmic reticulum	14	8	PF3D7_0415400,PF3D7_0606700,PF3D7_0808400,PF3D7_0905900,PF3D7_1134800,PF3D7_1144900,PF3D7_1145100,PF3D7_1429800,	57.1	2.59	4.73	0.00457307	0.0403145	1
GO:0009156	ribonucleoside monophosphate biosynthetic process	14	8	PF3D7_0206700,PF3D7_0512700,PF3D7_0520600,PF3D7_0920800,PF3D7_1012400,PF3D7_1012600,PF3D7_1029600,PF3D7_1329400,	57.1	2.59	4.73	0.00457307	0.0403145	1
GO:0006575	cellular modified amino acid metabolic process	16	9	PF3D7_0417200,PF3D7_0810800,PF3D7_0918900,PF3D7_0922400,PF3D7_1113700,PF3D7_1224000,PF3D7_1235600,PF3D7_1324800,PF3D7_1419300,	56.3	2.55	4.57	0.00302275	0.0280582	1
GO:0043648	dicarboxylic acid metabolic process	16	9	PF3D7_0608800,PF3D7_0623000,PF3D7_0802000,PF3D7_0810800,PF3D7_0922400,PF3D7_1235600,PF3D7_1308200,PF3D7_1320800,PF3D7_1416500,	56.3	2.55	4.57	0.00302275	0.0280582	1
GO:0016482	cytosolic transport	16	9	PF3D7_0103100,PF3D7_0305500,PF3D7_0727000,PF3D7_0815800,PF3D7_1110500,PF3D7_1119500,PF3D7_1144900,PF3D7_1250300,PF3D7_1406700,	56.3	2.55	4.57	0.00302275	0.0280582	1
GO:0000956	nuclear-transcribed mRNA catabolic process	36	20	PF3D7_0205400,PF3D7_0209200,PF3D7_0410400,PF3D7_0513200,PF3D7_0519500,PF3D7_0606600,PF3D7_0722100,PF3D7_0811300,PF3D7_0819900,PF3D7_0909400,PF3D7_0909900,PF3D7_1005500,PF3D7_1010200,PF3D7_1032100,PF3D7_1209200,PF3D7_1307000,PF3D7_1352700,PF3D7_1364500,PF3D7_1415400,PF3D7_1417200,	55.6	2.52	4.48	1.19462e-05	0.000363584	0.0188511
GO:0008652	cellular amino acid biosynthetic process	18	10	PF3D7_0309500,PF3D7_0417200,PF3D7_0608800,PF3D7_0910400,PF3D7_0922400,PF3D7_0922600,PF3D7_1235600,PF3D7_1324000,PF3D7_1357900,PF3D7_1416500,	55.6	2.52	4.44	0.00200154	0.0231938	1
GO:0022618	ribonucleoprotein complex assembly	98	54	PF3D7_0218500,PF3D7_0302100,PF3D7_0308600,PF3D7_0403700,PF3D7_0405400,PF3D7_0418200,PF3D7_0422400,PF3D7_0515000,PF3D7_0517000,PF3D7_0517700,PF3D7_0520700,PF3D7_0529500,PF3D7_0624200,PF3D7_0716800,PF3D7_0719600,PF3D7_0719700,PF3D7_0721600,PF3D7_0729300,PF3D7_0802300,PF3D7_0812700,PF3D7_0815600,PF3D7_0822300,PF3D7_0907600,PF3D7_0909800,PF3D7_0921800,PF3D7_1007900,PF3D7_1010600,PF3D7_1026800,PF3D7_1…	55.1	2.5	4.51	6.807e-13	1.53449e-10	1.07414e-09
GO:0006261	DNA-dependent DNA replication	51	28	PF3D7_0218000,PF3D7_0308000,PF3D7_0403700,PF3D7_0409600,PF3D7_0411900,PF3D7_0527000,PF3D7_0630300,PF3D7_0705300,PF3D7_0705400,PF3D7_0717500,PF3D7_0904800,PF3D7_1017000,PF3D7_1106700,PF3D7_1107400,PF3D7_1111100,PF3D7_1211700,PF3D7_1226600,PF3D7_1241700,PF3D7_1317100,PF3D7_1347100,PF3D7_1355100,PF3D7_1357500,PF3D7_1361900,PF3D7_1412100,PF3D7_1417800,PF3D7_1438700,PF3D7_1463200,PF3D7_1463300,	54.9	2.49	4.38	2.96352e-07	1.79863e-05	0.000467643
GO:0006325	chromatin organization	40	22	PF3D7_0110700,PF3D7_0416400,PF3D7_0501800,PF3D7_0517400,PF3D7_0624600,PF3D7_0627800,PF3D7_0628600,PF3D7_0719300,PF3D7_0820000,PF3D7_0919000,PF3D7_1104200,PF3D7_1105000,PF3D7_1105100,PF3D7_1106000,PF3D7_1203700,PF3D7_1205600,PF3D7_1224500,PF3D7_1248700,PF3D7_1329300,PF3D7_1362200,PF3D7_1422800,PF3D7_1433300,	55	2.49	4.38	5.43765e-06	0.000195014	0.00858061
GO:0071826	ribonucleoprotein complex subunit organization	101	55	PF3D7_0218500,PF3D7_0302100,PF3D7_0308600,PF3D7_0403700,PF3D7_0405400,PF3D7_0418200,PF3D7_0422400,PF3D7_0515000,PF3D7_0517000,PF3D7_0517700,PF3D7_0520700,PF3D7_0529500,PF3D7_0531400,PF3D7_0624200,PF3D7_0716800,PF3D7_0719600,PF3D7_0719700,PF3D7_0721600,PF3D7_0729300,PF3D7_0802300,PF3D7_0812700,PF3D7_0815600,PF3D7_0822300,PF3D7_0907600,PF3D7_0909800,PF3D7_0921800,PF3D7_1007900,PF3D7_1010600,PF3D7_1…	54.5	2.47	4.39	7.965e-13	1.5711e-10	1.25688e-09
GO:0006511	ubiquitin-dependent protein catabolic process	113	61	PF3D7_0108000,PF3D7_0205900,PF3D7_0212900,PF3D7_0305700,PF3D7_0312300,PF3D7_0314700,PF3D7_0317000,PF3D7_0317700,PF3D7_0317800,PF3D7_0413600,PF3D7_0413900,PF3D7_0507700,PF3D7_0516700,PF3D7_0527200,PF3D7_0603400,PF3D7_0608500,PF3D7_0619400,PF3D7_0629800,PF3D7_0707700,PF3D7_0726500,PF3D7_0727400,PF3D7_0803800,PF3D7_0807500,PF3D7_0807800,PF3D7_0811000,PF3D7_0904600,PF3D7_0912900,PF3D7_0917900,PF3D7_0…	54	2.44	4.33	7.28297e-14	2.29851e-11	1.14925e-10
GO:0006323	DNA packaging	26	14	PF3D7_0110700,PF3D7_0501800,PF3D7_0508500,PF3D7_0711500,PF3D7_0917000,PF3D7_0919000,PF3D7_1104200,PF3D7_1105000,PF3D7_1105100,PF3D7_1203700,PF3D7_1205600,PF3D7_1224500,PF3D7_1329300,PF3D7_1433300,	53.8	2.44	4.16	0.000390529	0.00640641	0.616254
GO:0043161	proteasome-mediated ubiquitin-dependent protein catabolic process	69	37	PF3D7_0108000,PF3D7_0205900,PF3D7_0312300,PF3D7_0317000,PF3D7_0317700,PF3D7_0507700,PF3D7_0603400,PF3D7_0608500,PF3D7_0619400,PF3D7_0707700,PF3D7_0727400,PF3D7_0803800,PF3D7_0807500,PF3D7_0807800,PF3D7_0811000,PF3D7_0912900,PF3D7_0917900,PF3D7_0931800,PF3D7_1011400,PF3D7_1011700,PF3D7_1017900,PF3D7_1113400,PF3D7_1129200,PF3D7_1202600,PF3D7_1248900,PF3D7_1306400,PF3D7_1328100,PF3D7_1336400,PF3D7_1…	53.6	2.43	4.19	8.5239e-09	7.47262e-07	1.34507e-05
GO:0043632	modification-dependent macromolecule catabolic process	120	64	PF3D7_0108000,PF3D7_0205900,PF3D7_0212900,PF3D7_0305700,PF3D7_0312300,PF3D7_0314700,PF3D7_0317000,PF3D7_0317700,PF3D7_0317800,PF3D7_0410400,PF3D7_0413600,PF3D7_0413900,PF3D7_0507700,PF3D7_0516700,PF3D7_0527200,PF3D7_0603400,PF3D7_0608500,PF3D7_0619400,PF3D7_0629800,PF3D7_0707700,PF3D7_0726500,PF3D7_0727400,PF3D7_0803800,PF3D7_0807500,PF3D7_0807800,PF3D7_0811000,PF3D7_0904600,PF3D7_0912900,PF3D7_0…	53.3	2.42	4.22	3.70862e-14	1.46305e-11	5.8522e-11
GO:0009161	ribonucleoside monophosphate metabolic process	15	8	PF3D7_0206700,PF3D7_0512700,PF3D7_0520600,PF3D7_0920800,PF3D7_1012400,PF3D7_1012600,PF3D7_1029600,PF3D7_1329400,	53.3	2.42	4.06	0.00792325	0.0612887	1
GO:0006366	transcription by RNA polymerase II	32	17	PF3D7_0110400,PF3D7_0205400,PF3D7_0215700,PF3D7_0303300,PF3D7_0318200,PF3D7_0517400,PF3D7_0520700,PF3D7_0610900,PF3D7_0704400,PF3D7_0708100,PF3D7_0929000,PF3D7_0934100,PF3D7_1250700,PF3D7_1304900,PF3D7_1364800,PF3D7_1406200,PF3D7_1475000,	53.1	2.41	4.05	0.000115963	0.00237649	0.18299
GO:0006401	RNA catabolic process	49	26	PF3D7_0205400,PF3D7_0209200,PF3D7_0410400,PF3D7_0507600,PF3D7_0513200,PF3D7_0519500,PF3D7_0602100,PF3D7_0606600,PF3D7_0722100,PF3D7_0811300,PF3D7_0819900,PF3D7_0909400,PF3D7_0909900,PF3D7_1005500,PF3D7_1010200,PF3D7_1032100,PF3D7_1136300,PF3D7_1209200,PF3D7_1307000,PF3D7_1331100,PF3D7_1340100,PF3D7_1352700,PF3D7_1359300,PF3D7_1364500,PF3D7_1415400,PF3D7_1417200,	53.1	2.4	4.06	1.89382e-06	8.30125e-05	0.00298845
GO:1901607	alpha-amino acid biosynthetic process	17	9	PF3D7_0309500,PF3D7_0417200,PF3D7_0608800,PF3D7_0910400,PF3D7_0922600,PF3D7_1235600,PF3D7_1324000,PF3D7_1357900,PF3D7_1416500,	52.9	2.4	3.99	0.00517808	0.0430053	1
GO:0043488	regulation of mRNA stability	17	9	PF3D7_0410400,PF3D7_0519500,PF3D7_0722100,PF3D7_0811300,PF3D7_1032100,PF3D7_1307000,PF3D7_1359300,PF3D7_1364500,PF3D7_1417200,	52.9	2.4	3.99	0.00517808	0.0430053	1
GO:0006260	DNA replication	53	28	PF3D7_0218000,PF3D7_0219600,PF3D7_0308000,PF3D7_0317200,PF3D7_0409600,PF3D7_0411900,PF3D7_0419600,PF3D7_0517400,PF3D7_0630300,PF3D7_0705300,PF3D7_0705400,PF3D7_0717500,PF3D7_1015800,PF3D7_1017000,PF3D7_1111100,PF3D7_1127100,PF3D7_1211700,PF3D7_1241700,PF3D7_1317100,PF3D7_1355100,PF3D7_1361900,PF3D7_1411300,PF3D7_1417800,PF3D7_1437200,PF3D7_1441400,PF3D7_1442100,PF3D7_1463200,PF3D7_1463300,	52.8	2.39	4.03	8.54008e-07	4.64698e-05	0.00134763
GO:0019941	modification-dependent protein catabolic process	116	61	PF3D7_0108000,PF3D7_0205900,PF3D7_0212900,PF3D7_0305700,PF3D7_0312300,PF3D7_0314700,PF3D7_0317000,PF3D7_0317700,PF3D7_0317800,PF3D7_0413600,PF3D7_0413900,PF3D7_0507700,PF3D7_0516700,PF3D7_0527200,PF3D7_0603400,PF3D7_0608500,PF3D7_0619400,PF3D7_0629800,PF3D7_0707700,PF3D7_0726500,PF3D7_0727400,PF3D7_0803800,PF3D7_0807500,PF3D7_0807800,PF3D7_0811000,PF3D7_0904600,PF3D7_0912900,PF3D7_0917900,PF3D7_0…	52.6	2.38	4.09	3.48462e-13	9.16454e-11	5.49872e-10
GO:0006402	mRNA catabolic process	40	21	PF3D7_0205400,PF3D7_0209200,PF3D7_0410400,PF3D7_0507600,PF3D7_0513200,PF3D7_0519500,PF3D7_0606600,PF3D7_0722100,PF3D7_0811300,PF3D7_0819900,PF3D7_0909400,PF3D7_0909900,PF3D7_1005500,PF3D7_1010200,PF3D7_1032100,PF3D7_1209200,PF3D7_1307000,PF3D7_1352700,PF3D7_1364500,PF3D7_1415400,PF3D7_1417200,	52.5	2.38	3.96	2.31884e-05	0.000677617	0.0365913
GO:0051640	organelle localization	38	20	PF3D7_0216400,PF3D7_0302900,PF3D7_0303000,PF3D7_0316500,PF3D7_0502000,PF3D7_0613700,PF3D7_0613900,PF3D7_0729300,PF3D7_0804900,PF3D7_1034000,PF3D7_1117700,PF3D7_1134800,PF3D7_1229800,PF3D7_1244600,PF3D7_1309700,PF3D7_1329100,PF3D7_1332800,PF3D7_1342600,PF3D7_1368200,PF3D7_1439800,	52.6	2.38	3.98	3.46504e-05	0.000896367	0.0546784
GO:0018209	peptidyl-serine modification	19	10	PF3D7_0217500,PF3D7_0317200,PF3D7_0717500,PF3D7_0934800,PF3D7_1003300,PF3D7_1108400,PF3D7_1121900,PF3D7_1136500,PF3D7_1148000,PF3D7_1443000,	52.6	2.38	3.95	0.00339791	0.0311738	1
GO:0010498	proteasomal protein catabolic process	71	37	PF3D7_0108000,PF3D7_0205900,PF3D7_0312300,PF3D7_0317000,PF3D7_0317700,PF3D7_0507700,PF3D7_0603400,PF3D7_0608500,PF3D7_0619400,PF3D7_0707700,PF3D7_0727400,PF3D7_0803800,PF3D7_0807500,PF3D7_0807800,PF3D7_0811000,PF3D7_0912900,PF3D7_0917900,PF3D7_0931800,PF3D7_1011400,PF3D7_1011700,PF3D7_1017900,PF3D7_1113400,PF3D7_1129200,PF3D7_1202600,PF3D7_1248900,PF3D7_1306400,PF3D7_1328100,PF3D7_1336400,PF3D7_1…	52.1	2.36	3.94	2.36247e-08	1.9257e-06	3.72798e-05
GO:0051168	nuclear export	25	13	PF3D7_0205400,PF3D7_0302900,PF3D7_0419600,PF3D7_0729300,PF3D7_0910100,PF3D7_0932800,PF3D7_1117700,PF3D7_1202600,PF3D7_1315900,PF3D7_1332800,PF3D7_1368200,PF3D7_1422400,PF3D7_1459000,	52	2.35	3.86	0.000977303	0.0130694	1
GO:0006357	regulation of transcription by RNA polymerase II	49	25	PF3D7_0413600,PF3D7_0415300,PF3D7_0506800,PF3D7_0517400,PF3D7_0520700,PF3D7_0610900,PF3D7_0611400,PF3D7_0628600,PF3D7_0709300,PF3D7_0714500,PF3D7_0822100,PF3D7_1012700,PF3D7_1103600,PF3D7_1106000,PF3D7_1107500,PF3D7_1130400,PF3D7_1306400,PF3D7_1311500,PF3D7_1355700,PF3D7_1362200,PF3D7_1406200,PF3D7_1422800,PF3D7_1469700,PF3D7_1473700,PF3D7_1475000,	51	2.31	3.74	7.55419e-06	0.0002649	0.0119205
GO:0034622	cellular protein-containing complex assembly	177	89	PF3D7_0110700,PF3D7_0218500,PF3D7_0302100,PF3D7_0308600,PF3D7_0317800,PF3D7_0403700,PF3D7_0405400,PF3D7_0413600,PF3D7_0418200,PF3D7_0422400,PF3D7_0512000,PF3D7_0515000,PF3D7_0517000,PF3D7_0517700,PF3D7_0520700,PF3D7_0527000,PF3D7_0528000,PF3D7_0529500,PF3D7_0624200,PF3D7_0705400,PF3D7_0708000,PF3D7_0716800,PF3D7_0717500,PF3D7_0718500,PF3D7_0719000,PF3D7_0719600,PF3D7_0719700,PF3D7_0721600,PF3D7_0…	50.3	2.28	3.8	4.07855e-17	2.14532e-14	6.43595e-14
GO:0071103	DNA conformation change	58	29	PF3D7_0110700,PF3D7_0409600,PF3D7_0501800,PF3D7_0508500,PF3D7_0527000,PF3D7_0605800,PF3D7_0705400,PF3D7_0711500,PF3D7_0904800,PF3D7_0917000,PF3D7_0919000,PF3D7_0934100,PF3D7_1104200,PF3D7_1105000,PF3D7_1105100,PF3D7_1203700,PF3D7_1205600,PF3D7_1211700,PF3D7_1224500,PF3D7_1317100,PF3D7_1329300,PF3D7_1347100,PF3D7_1355100,PF3D7_1357500,PF3D7_1408400,PF3D7_1417800,PF3D7_1433300,PF3D7_1433500,PF3D7_1…	50	2.26	3.6	2.40601e-06	0.000102613	0.00379668
GO:0006413	translational initiation	50	25	PF3D7_0315100,PF3D7_0418200,PF3D7_0517700,PF3D7_0529500,PF3D7_0607000,PF3D7_0716800,PF3D7_0728000,PF3D7_0815600,PF3D7_0828500,PF3D7_0907600,PF3D7_0918300,PF3D7_1007900,PF3D7_1010600,PF3D7_1013900,PF3D7_1019000,PF3D7_1204300,PF3D7_1206200,PF3D7_1212700,PF3D7_1250600,PF3D7_1326400,PF3D7_1366900,PF3D7_1368200,PF3D7_1410600,PF3D7_1438000,PF3D7_1468700,	50	2.26	3.59	1.19812e-05	0.000363584	0.0189064
GO:0031123	RNA 3'-end processing	32	16	PF3D7_0109200,PF3D7_0209200,PF3D7_0410400,PF3D7_0513200,PF3D7_0520700,PF3D7_0526500,PF3D7_0819000,PF3D7_0821600,PF3D7_1120500,PF3D7_1144000,PF3D7_1307000,PF3D7_1364500,PF3D7_1407100,PF3D7_1417500,PF3D7_1438500,PF3D7_1465300,	50	2.26	3.57	0.000456253	0.0073466	0.719967
GO:0032392	DNA geometric change	28	14	PF3D7_0409600,PF3D7_0527000,PF3D7_0605800,PF3D7_0705400,PF3D7_0904800,PF3D7_0934100,PF3D7_1211700,PF3D7_1317100,PF3D7_1347100,PF3D7_1355100,PF3D7_1357500,PF3D7_1408400,PF3D7_1417800,PF3D7_1459000,	50	2.26	3.56	0.00103553	0.0137317	1
GO:0006470	protein dephosphorylation	26	13	PF3D7_0309000,PF3D7_0410300,PF3D7_0810300,PF3D7_0810500,PF3D7_1012700,PF3D7_1031700,PF3D7_1135100,PF3D7_1138500,PF3D7_1355500,PF3D7_1355700,PF3D7_1414400,PF3D7_1423300,PF3D7_1464600,	50	2.26	3.56	0.00156408	0.0189752	1
GO:0032508	DNA duplex unwinding	26	13	PF3D7_0409600,PF3D7_0527000,PF3D7_0605800,PF3D7_0705400,PF3D7_0904800,PF3D7_0934100,PF3D7_1211700,PF3D7_1317100,PF3D7_1347100,PF3D7_1355100,PF3D7_1408400,PF3D7_1417800,PF3D7_1459000,	50	2.26	3.56	0.00156408	0.0189752	1
GO:0070646	protein modification by small protein removal	24	12	PF3D7_0413900,PF3D7_0516700,PF3D7_0527200,PF3D7_0630600,PF3D7_0726500,PF3D7_0904600,PF3D7_1031400,PF3D7_1117100,PF3D7_1217900,PF3D7_1317000,PF3D7_1368100,PF3D7_1408700,	50	2.26	3.56	0.00236743	0.0233522	1
GO:0016579	protein deubiquitination	22	11	PF3D7_0413900,PF3D7_0516700,PF3D7_0527200,PF3D7_0630600,PF3D7_0726500,PF3D7_0904600,PF3D7_1031400,PF3D7_1117100,PF3D7_1317000,PF3D7_1368100,PF3D7_1408700,	50	2.26	3.55	0.00359253	0.0325805	1
GO:0043487	regulation of RNA stability	18	9	PF3D7_0410400,PF3D7_0519500,PF3D7_0722100,PF3D7_0811300,PF3D7_1032100,PF3D7_1307000,PF3D7_1359300,PF3D7_1364500,PF3D7_1417200,	50	2.26	3.55	0.00835463	0.0628636	1
GO:0061013	regulation of mRNA catabolic process	18	9	PF3D7_0410400,PF3D7_0519500,PF3D7_0722100,PF3D7_0811300,PF3D7_1032100,PF3D7_1307000,PF3D7_1359300,PF3D7_1364500,PF3D7_1417200,	50	2.26	3.55	0.00835463	0.0628636	1
GO:0016571	histone methylation	18	9	PF3D7_0629700,PF3D7_0811500,PF3D7_0823300,PF3D7_1008100,PF3D7_1115200,PF3D7_1355300,PF3D7_1361000,PF3D7_1407100,PF3D7_1426200,	50	2.26	3.55	0.00835463	0.0628636	1
GO:0018105	peptidyl-serine phosphorylation	18	9	PF3D7_0217500,PF3D7_0317200,PF3D7_0717500,PF3D7_0934800,PF3D7_1108400,PF3D7_1121900,PF3D7_1136500,PF3D7_1148000,PF3D7_1443000,	50	2.26	3.55	0.00835463	0.0628636	1
GO:0000469	cleavage involved in rRNA processing	18	9	PF3D7_0106700,PF3D7_0303100,PF3D7_0410400,PF3D7_0418700,PF3D7_1144000,PF3D7_1307000,PF3D7_1364500,PF3D7_1410300,PF3D7_1451900,	50	2.26	3.55	0.00835463	0.0628636	1
GO:0065003	protein-containing complex assembly	193	95	PF3D7_0110700,PF3D7_0218500,PF3D7_0302100,PF3D7_0308600,PF3D7_0309600,PF3D7_0317800,PF3D7_0403700,PF3D7_0405400,PF3D7_0413600,PF3D7_0418200,PF3D7_0422400,PF3D7_0512000,PF3D7_0515000,PF3D7_0517000,PF3D7_0517700,PF3D7_0520700,PF3D7_0527000,PF3D7_0528000,PF3D7_0529500,PF3D7_0624200,PF3D7_0626800,PF3D7_0705400,PF3D7_0708000,PF3D7_0716800,PF3D7_0717500,PF3D7_0718500,PF3D7_0719000,PF3D7_0719600,PF3D7_0…	49.2	2.23	3.65	2.06873e-17	1.63222e-14	3.26445e-14
GO:0048193	Golgi vesicle transport	63	31	PF3D7_0103100,PF3D7_0214100,PF3D7_0303000,PF3D7_0305500,PF3D7_0310700,PF3D7_0405100,PF3D7_0415400,PF3D7_0416800,PF3D7_0505100,PF3D7_0606700,PF3D7_0804900,PF3D7_0808400,PF3D7_0815800,PF3D7_0822600,PF3D7_0905900,PF3D7_1034000,PF3D7_1119500,PF3D7_1130500,PF3D7_1134800,PF3D7_1144900,PF3D7_1145100,PF3D7_1230700,PF3D7_1231100,PF3D7_1244600,PF3D7_1323800,PF3D7_1335700,PF3D7_1361100,PF3D7_1429800,PF3D7_1…	49.2	2.23	3.49	1.68257e-06	8.10027e-05	0.0026551
GO:0043933	protein-containing complex subunit organization	223	108	PF3D7_0110700,PF3D7_0212300,PF3D7_0218500,PF3D7_0302100,PF3D7_0303000,PF3D7_0308600,PF3D7_0309600,PF3D7_0317800,PF3D7_0403700,PF3D7_0405400,PF3D7_0413600,PF3D7_0418200,PF3D7_0422400,PF3D7_0503400,PF3D7_0512000,PF3D7_0515000,PF3D7_0517000,PF3D7_0517700,PF3D7_0520700,PF3D7_0527000,PF3D7_0528000,PF3D7_0529500,PF3D7_0531400,PF3D7_0619400,PF3D7_0624200,PF3D7_0626800,PF3D7_0628600,PF3D7_0705400,PF3D7_0…	48.4	2.19	3.57	5.17161e-19	8.1608e-16	8.1608e-16
GO:0090501	RNA phosphodiester bond hydrolysis	31	15	PF3D7_0106700,PF3D7_0110400,PF3D7_0303100,PF3D7_0410400,PF3D7_0418700,PF3D7_0621500,PF3D7_0709600,PF3D7_0819000,PF3D7_1144000,PF3D7_1307000,PF3D7_1364500,PF3D7_1410300,PF3D7_1438500,PF3D7_1451900,PF3D7_1465300,	48.4	2.19	3.34	0.00106251	0.0139721	1
GO:0006414	translational elongation	21	10	PF3D7_0309600,PF3D7_0319600,PF3D7_0913200,PF3D7_0931000,PF3D7_1103100,PF3D7_1123400,PF3D7_1330600,PF3D7_1338300,PF3D7_1357000,PF3D7_1451100,	47.6	2.16	3.23	0.00840571	0.0628636	1
GO:0006897	endocytosis	21	10	PF3D7_0304200,PF3D7_0515300,PF3D7_0904100,PF3D7_1136500,PF3D7_1219100,PF3D7_1343700,PF3D7_1411300,PF3D7_1422800,PF3D7_1440700,PF3D7_1455500,	47.6	2.16	3.23	0.00840571	0.0628636	1
GO:1901605	alpha-amino acid metabolic process	38	18	PF3D7_0309500,PF3D7_0405700,PF3D7_0417200,PF3D7_0608800,PF3D7_0802000,PF3D7_0906500,PF3D7_0910400,PF3D7_0922400,PF3D7_0922600,PF3D7_1012600,PF3D7_1033100,PF3D7_1235600,PF3D7_1308200,PF3D7_1320800,PF3D7_1324000,PF3D7_1357900,PF3D7_1410200,PF3D7_1416500,	47.4	2.15	3.21	0.000474078	0.00753819	0.748096
GO:0016192	vesicle-mediated transport	140	65	PF3D7_0103100,PF3D7_0214100,PF3D7_0216400,PF3D7_0303000,PF3D7_0304200,PF3D7_0305500,PF3D7_0310700,PF3D7_0405100,PF3D7_0415400,PF3D7_0416800,PF3D7_0502000,PF3D7_0505100,PF3D7_0515300,PF3D7_0528100,PF3D7_0606700,PF3D7_0613500,PF3D7_0613700,PF3D7_0727000,PF3D7_0730200,PF3D7_0804900,PF3D7_0808400,PF3D7_0815800,PF3D7_0822600,PF3D7_0904100,PF3D7_0905900,PF3D7_0906100,PF3D7_1006700,PF3D7_1020900,PF3D7_1…	46.4	2.1	3.19	8.15104e-11	1.1693e-08	1.28623e-07
GO:0051603	proteolysis involved in cellular protein catabolic process	138	64	PF3D7_0108000,PF3D7_0205900,PF3D7_0207500,PF3D7_0207700,PF3D7_0212900,PF3D7_0305700,PF3D7_0312300,PF3D7_0314700,PF3D7_0317000,PF3D7_0317700,PF3D7_0317800,PF3D7_0413600,PF3D7_0413900,PF3D7_0507700,PF3D7_0516700,PF3D7_0518300,PF3D7_0527200,PF3D7_0603400,PF3D7_0608500,PF3D7_0619400,PF3D7_0629800,PF3D7_0707700,PF3D7_0726500,PF3D7_0727400,PF3D7_0803800,PF3D7_0807500,PF3D7_0807800,PF3D7_0811000,PF3D7_0…	46.4	2.1	3.18	1.21604e-10	1.47608e-08	1.91891e-07
GO:0044257	cellular protein catabolic process	138	64	PF3D7_0108000,PF3D7_0205900,PF3D7_0207500,PF3D7_0207700,PF3D7_0212900,PF3D7_0305700,PF3D7_0312300,PF3D7_0314700,PF3D7_0317000,PF3D7_0317700,PF3D7_0317800,PF3D7_0413600,PF3D7_0413900,PF3D7_0507700,PF3D7_0516700,PF3D7_0518300,PF3D7_0527200,PF3D7_0603400,PF3D7_0608500,PF3D7_0619400,PF3D7_0629800,PF3D7_0707700,PF3D7_0726500,PF3D7_0727400,PF3D7_0803800,PF3D7_0807500,PF3D7_0807800,PF3D7_0811000,PF3D7_0…	46.4	2.1	3.18	1.21604e-10	1.47608e-08	1.91891e-07
GO:0006888	endoplasmic reticulum to Golgi vesicle-mediated transport	39	18	PF3D7_0214100,PF3D7_0303000,PF3D7_0310700,PF3D7_0405100,PF3D7_0416800,PF3D7_0505100,PF3D7_0606700,PF3D7_0808400,PF3D7_0822600,PF3D7_0905900,PF3D7_1034000,PF3D7_1130500,PF3D7_1134800,PF3D7_1145100,PF3D7_1230700,PF3D7_1231100,PF3D7_1361100,PF3D7_1429800,	46.2	2.09	3.06	0.000701312	0.00954027	1
GO:0140694	non-membrane-bounded organelle assembly	61	28	PF3D7_0107000,PF3D7_0320800,PF3D7_0422400,PF3D7_0517000,PF3D7_0717500,PF3D7_0719600,PF3D7_0719700,PF3D7_0721600,PF3D7_0729300,PF3D7_0802300,PF3D7_0819900,PF3D7_0921800,PF3D7_1026800,PF3D7_1027800,PF3D7_1130200,PF3D7_1146000,PF3D7_1309100,PF3D7_1317800,PF3D7_1323400,PF3D7_1332800,PF3D7_1414300,PF3D7_1424100,PF3D7_1431300,PF3D7_1435700,PF3D7_1443600,PF3D7_1446600,PF3D7_1461300,PF3D7_1466700,	45.9	2.08	3.05	2.81538e-05	0.000752995	0.0444267
GO:0042255	ribosome assembly	46	21	PF3D7_0422400,PF3D7_0517000,PF3D7_0719600,PF3D7_0719700,PF3D7_0721600,PF3D7_0729300,PF3D7_0802300,PF3D7_0921800,PF3D7_1026800,PF3D7_1027800,PF3D7_1130200,PF3D7_1146000,PF3D7_1309100,PF3D7_1317800,PF3D7_1323400,PF3D7_1332800,PF3D7_1414300,PF3D7_1424100,PF3D7_1431300,PF3D7_1461300,PF3D7_1466700,	45.7	2.07	3.0	0.000308796	0.00529652	0.487279
GO:0000375	RNA splicing, via transesterification reactions	104	47	PF3D7_0218500,PF3D7_0218700,PF3D7_0302000,PF3D7_0302100,PF3D7_0308600,PF3D7_0403700,PF3D7_0405400,PF3D7_0422500,PF3D7_0515000,PF3D7_0517300,PF3D7_0520300,PF3D7_0522800,PF3D7_0531400,PF3D7_0624200,PF3D7_0812700,PF3D7_0819900,PF3D7_0822300,PF3D7_0822800,PF3D7_0909800,PF3D7_0935000,PF3D7_1002400,PF3D7_1003800,PF3D7_1022400,PF3D7_1033600,PF3D7_1110200,PF3D7_1119800,PF3D7_1123900,PF3D7_1125500,PF3D7_1…	45.2	2.05	3.0	1.02017e-07	6.7076e-06	0.000160982
GO:1901565	organonitrogen compound catabolic process	174	78	PF3D7_0108000,PF3D7_0205900,PF3D7_0207500,PF3D7_0207700,PF3D7_0212900,PF3D7_0305700,PF3D7_0312300,PF3D7_0314700,PF3D7_0317000,PF3D7_0317700,PF3D7_0317800,PF3D7_0405700,PF3D7_0413600,PF3D7_0413900,PF3D7_0507700,PF3D7_0513300,PF3D7_0516700,PF3D7_0518300,PF3D7_0527200,PF3D7_0603400,PF3D7_0608500,PF3D7_0608800,PF3D7_0619400,PF3D7_0629800,PF3D7_0707700,PF3D7_0726500,PF3D7_0727400,PF3D7_0729100,PF3D7_0…	44.8	2.03	3.01	8.90757e-12	1.56179e-09	1.40561e-08
GO:0006520	cellular amino acid metabolic process	87	39	PF3D7_0102900,PF3D7_0109800,PF3D7_0211800,PF3D7_0309500,PF3D7_0405700,PF3D7_0417200,PF3D7_0608800,PF3D7_0621200,PF3D7_0622800,PF3D7_0623000,PF3D7_0717700,PF3D7_0802000,PF3D7_0807900,PF3D7_0906500,PF3D7_0910400,PF3D7_0922400,PF3D7_0922600,PF3D7_1012600,PF3D7_1033100,PF3D7_1034900,PF3D7_1104000,PF3D7_1213800,PF3D7_1218600,PF3D7_1235600,PF3D7_1308200,PF3D7_1320800,PF3D7_1324000,PF3D7_1331700,PF3D7_1…	44.8	2.03	2.94	1.62411e-06	8.10027e-05	0.00256284
GO:0030163	protein catabolic process	146	65	PF3D7_0108000,PF3D7_0205900,PF3D7_0207500,PF3D7_0207700,PF3D7_0212900,PF3D7_0305700,PF3D7_0312300,PF3D7_0314700,PF3D7_0317000,PF3D7_0317700,PF3D7_0317800,PF3D7_0413600,PF3D7_0413900,PF3D7_0507700,PF3D7_0516700,PF3D7_0518300,PF3D7_0527200,PF3D7_0603400,PF3D7_0608500,PF3D7_0619400,PF3D7_0629800,PF3D7_0707700,PF3D7_0726500,PF3D7_0727400,PF3D7_0803800,PF3D7_0807500,PF3D7_0807800,PF3D7_0811000,PF3D7_0…	44.5	2.02	2.95	7.45744e-10	8.4056e-08	1.17678e-06
GO:0000724	double-strand break repair via homologous recombination	27	12	PF3D7_0107800,PF3D7_0409600,PF3D7_0527000,PF3D7_0705400,PF3D7_0904800,PF3D7_1107400,PF3D7_1123800,PF3D7_1211700,PF3D7_1317100,PF3D7_1355100,PF3D7_1417800,PF3D7_1442100,	44.4	2.01	2.84	0.00785855	0.0610877	1
GO:0006403	RNA localization	27	12	PF3D7_0205400,PF3D7_0410400,PF3D7_0419600,PF3D7_0617200,PF3D7_1117700,PF3D7_1230700,PF3D7_1307000,PF3D7_1315900,PF3D7_1369500,PF3D7_1415400,PF3D7_1422400,PF3D7_1459000,	44.4	2.01	2.84	0.00785855	0.0610877	1
GO:0006418	tRNA aminoacylation for protein translation	41	18	PF3D7_0102900,PF3D7_0109800,PF3D7_0211800,PF3D7_0622800,PF3D7_0717700,PF3D7_0807900,PF3D7_1034900,PF3D7_1104000,PF3D7_1213800,PF3D7_1218600,PF3D7_1331700,PF3D7_1332900,PF3D7_1336900,PF3D7_1349200,PF3D7_1350100,PF3D7_1442300,PF3D7_1445100,PF3D7_1461900,	43.9	1.99	2.79	0.00144338	0.0179343	1
GO:0008380	RNA splicing	129	56	PF3D7_0218500,PF3D7_0218700,PF3D7_0302000,PF3D7_0302100,PF3D7_0308600,PF3D7_0321800,PF3D7_0403700,PF3D7_0405400,PF3D7_0422500,PF3D7_0503300,PF3D7_0515000,PF3D7_0517300,PF3D7_0520300,PF3D7_0522800,PF3D7_0526500,PF3D7_0531400,PF3D7_0614400,PF3D7_0624200,PF3D7_0812700,PF3D7_0819900,PF3D7_0821600,PF3D7_0822300,PF3D7_0822800,PF3D7_0909800,PF3D7_0935000,PF3D7_1002400,PF3D7_1003800,PF3D7_1022400,PF3D7_1…	43.4	1.97	2.8	3.48252e-08	2.49792e-06	5.49542e-05
GO:0015031	protein transport	60	26	PF3D7_0103100,PF3D7_0216400,PF3D7_0305500,PF3D7_0512600,PF3D7_0528100,PF3D7_0615800,PF3D7_0730200,PF3D7_0904100,PF3D7_0906100,PF3D7_1006700,PF3D7_1020900,PF3D7_1034000,PF3D7_1038100,PF3D7_1110500,PF3D7_1126100,PF3D7_1130500,PF3D7_1134800,PF3D7_1224200,PF3D7_1230700,PF3D7_1234600,PF3D7_1242800,PF3D7_1309700,PF3D7_1323800,PF3D7_1451000,PF3D7_1455500,PF3D7_1465100,	43.3	1.96	2.74	0.000176953	0.00317308	0.279231
GO:0000398	mRNA splicing, via spliceosome	100	43	PF3D7_0218500,PF3D7_0218700,PF3D7_0302000,PF3D7_0302100,PF3D7_0308600,PF3D7_0403700,PF3D7_0405400,PF3D7_0515000,PF3D7_0517300,PF3D7_0520300,PF3D7_0522800,PF3D7_0531400,PF3D7_0624200,PF3D7_0812700,PF3D7_0819900,PF3D7_0822300,PF3D7_0909800,PF3D7_0935000,PF3D7_1002400,PF3D7_1003800,PF3D7_1033600,PF3D7_1110200,PF3D7_1119800,PF3D7_1123900,PF3D7_1125500,PF3D7_1126900,PF3D7_1209200,PF3D7_1220100,PF3D7_1…	43	1.95	2.73	1.89332e-06	8.30125e-05	0.00298766
GO:0000377	RNA splicing, via transesterification reactions with bulged adenosine as nucleophile	100	43	PF3D7_0218500,PF3D7_0218700,PF3D7_0302000,PF3D7_0302100,PF3D7_0308600,PF3D7_0403700,PF3D7_0405400,PF3D7_0515000,PF3D7_0517300,PF3D7_0520300,PF3D7_0522800,PF3D7_0531400,PF3D7_0624200,PF3D7_0812700,PF3D7_0819900,PF3D7_0822300,PF3D7_0909800,PF3D7_0935000,PF3D7_1002400,PF3D7_1003800,PF3D7_1033600,PF3D7_1110200,PF3D7_1119800,PF3D7_1123900,PF3D7_1125500,PF3D7_1126900,PF3D7_1209200,PF3D7_1220100,PF3D7_1…	43	1.95	2.73	1.89332e-06	8.30125e-05	0.00298766
GO:0043039	tRNA aminoacylation	42	18	PF3D7_0102900,PF3D7_0109800,PF3D7_0211800,PF3D7_0622800,PF3D7_0717700,PF3D7_0807900,PF3D7_1034900,PF3D7_1104000,PF3D7_1213800,PF3D7_1218600,PF3D7_1331700,PF3D7_1332900,PF3D7_1336900,PF3D7_1349200,PF3D7_1350100,PF3D7_1442300,PF3D7_1445100,PF3D7_1461900,	42.9	1.94	2.67	0.00201366	0.0231938	1
GO:0043038	amino acid activation	42	18	PF3D7_0102900,PF3D7_0109800,PF3D7_0211800,PF3D7_0622800,PF3D7_0717700,PF3D7_0807900,PF3D7_1034900,PF3D7_1104000,PF3D7_1213800,PF3D7_1218600,PF3D7_1331700,PF3D7_1332900,PF3D7_1336900,PF3D7_1349200,PF3D7_1350100,PF3D7_1442300,PF3D7_1445100,PF3D7_1461900,	42.9	1.94	2.67	0.00201366	0.0231938	1
GO:0009165	nucleotide biosynthetic process	61	26	PF3D7_0106100,PF3D7_0206700,PF3D7_0412300,PF3D7_0417200,PF3D7_0512700,PF3D7_0520600,PF3D7_0627800,PF3D7_0629100,PF3D7_0802600,PF3D7_0920800,PF3D7_0926700,PF3D7_1012400,PF3D7_1012600,PF3D7_1015800,PF3D7_1024300,PF3D7_1102400,PF3D7_1127100,PF3D7_1325100,PF3D7_1329400,PF3D7_1350100,PF3D7_1366500,PF3D7_1405600,PF3D7_1410200,PF3D7_1420600,PF3D7_1437200,PF3D7_1437400,	42.6	1.93	2.66	0.000244747	0.00429122	0.38621
GO:1901293	nucleoside phosphate biosynthetic process	64	27	PF3D7_0106100,PF3D7_0206700,PF3D7_0412300,PF3D7_0417200,PF3D7_0512700,PF3D7_0520600,PF3D7_0627800,PF3D7_0629100,PF3D7_0802600,PF3D7_0920800,PF3D7_0926700,PF3D7_1012400,PF3D7_1012600,PF3D7_1015800,PF3D7_1024300,PF3D7_1029600,PF3D7_1102400,PF3D7_1127100,PF3D7_1325100,PF3D7_1329400,PF3D7_1350100,PF3D7_1366500,PF3D7_1405600,PF3D7_1410200,PF3D7_1420600,PF3D7_1437200,PF3D7_1437400,	42.2	1.91	2.62	0.000229373	0.00406686	0.361951
GO:0016071	mRNA metabolic process	185	77	PF3D7_0109200,PF3D7_0110400,PF3D7_0205400,PF3D7_0209200,PF3D7_0218500,PF3D7_0218700,PF3D7_0302000,PF3D7_0302100,PF3D7_0308600,PF3D7_0403700,PF3D7_0405400,PF3D7_0410400,PF3D7_0507600,PF3D7_0513200,PF3D7_0515000,PF3D7_0517300,PF3D7_0519500,PF3D7_0520300,PF3D7_0520700,PF3D7_0522800,PF3D7_0526500,PF3D7_0531400,PF3D7_0606600,PF3D7_0610200,PF3D7_0614400,PF3D7_0624200,PF3D7_0722100,PF3D7_0811300,PF3D7_0…	41.6	1.88	2.63	9.5375e-10	1.00334e-07	1.50502e-06
GO:0016311	dephosphorylation	37	15	PF3D7_0309000,PF3D7_0410300,PF3D7_0705500,PF3D7_0810300,PF3D7_0810500,PF3D7_1012700,PF3D7_1031700,PF3D7_1033400,PF3D7_1135100,PF3D7_1138500,PF3D7_1355500,PF3D7_1355700,PF3D7_1414400,PF3D7_1423300,PF3D7_1464600,	40.5	1.84	2.43	0.00864349	0.0640349	1
GO:0043543	protein acylation	37	15	PF3D7_0110500,PF3D7_0416400,PF3D7_0627800,PF3D7_0628600,PF3D7_0704400,PF3D7_0823300,PF3D7_1003300,PF3D7_1008100,PF3D7_1103600,PF3D7_1106000,PF3D7_1224500,PF3D7_1244100,PF3D7_1362200,PF3D7_1412800,PF3D7_1422800,	40.5	1.84	2.43	0.00864349	0.0640349	1
GO:0070925	organelle assembly	84	34	PF3D7_0107000,PF3D7_0320800,PF3D7_0422400,PF3D7_0505100,PF3D7_0515300,PF3D7_0517000,PF3D7_0717500,PF3D7_0719600,PF3D7_0719700,PF3D7_0721600,PF3D7_0729300,PF3D7_0802300,PF3D7_0819900,PF3D7_0921800,PF3D7_1012900,PF3D7_1015900,PF3D7_1026800,PF3D7_1027800,PF3D7_1126100,PF3D7_1130200,PF3D7_1146000,PF3D7_1309100,PF3D7_1317800,PF3D7_1323400,PF3D7_1332800,PF3D7_1414300,PF3D7_1424100,PF3D7_1430400,PF3D7_1…	40.5	1.83	2.44	0.000100327	0.0022298	0.158316
GO:0006397	mRNA processing	145	58	PF3D7_0109200,PF3D7_0218500,PF3D7_0218700,PF3D7_0302000,PF3D7_0302100,PF3D7_0308600,PF3D7_0403700,PF3D7_0405400,PF3D7_0513200,PF3D7_0515000,PF3D7_0517300,PF3D7_0520300,PF3D7_0520700,PF3D7_0522800,PF3D7_0526500,PF3D7_0531400,PF3D7_0610200,PF3D7_0614400,PF3D7_0624200,PF3D7_0812700,PF3D7_0819000,PF3D7_0819900,PF3D7_0821600,PF3D7_0822300,PF3D7_0909400,PF3D7_0909800,PF3D7_0935000,PF3D7_1002400,PF3D7_1…	40	1.81	2.43	6.1223e-07	3.45035e-05	0.000966099
GO:0006753	nucleoside phosphate metabolic process	99	39	PF3D7_0106100,PF3D7_0206700,PF3D7_0217900,PF3D7_0412300,PF3D7_0417200,PF3D7_0512700,PF3D7_0520600,PF3D7_0624000,PF3D7_0626800,PF3D7_0627800,PF3D7_0629100,PF3D7_0802600,PF3D7_0915400,PF3D7_0920800,PF3D7_0926700,PF3D7_1008900,PF3D7_1012400,PF3D7_1012600,PF3D7_1015800,PF3D7_1015900,PF3D7_1024300,PF3D7_1029600,PF3D7_1102400,PF3D7_1120100,PF3D7_1127100,PF3D7_1239000,PF3D7_1320800,PF3D7_1325100,PF3D7_1…	39.4	1.78	2.34	6.47146e-05	0.00148	0.10212
GO:0009117	nucleotide metabolic process	98	38	PF3D7_0106100,PF3D7_0206700,PF3D7_0217900,PF3D7_0412300,PF3D7_0417200,PF3D7_0512700,PF3D7_0520600,PF3D7_0624000,PF3D7_0626800,PF3D7_0627800,PF3D7_0629100,PF3D7_0802600,PF3D7_0915400,PF3D7_0920800,PF3D7_0926700,PF3D7_1008900,PF3D7_1012400,PF3D7_1012600,PF3D7_1015800,PF3D7_1015900,PF3D7_1024300,PF3D7_1102400,PF3D7_1120100,PF3D7_1127100,PF3D7_1239000,PF3D7_1320800,PF3D7_1325100,PF3D7_1329400,PF3D7_1…	38.8	1.76	2.28	0.000119308	0.00239238	0.188269
GO:0009150	purine ribonucleotide metabolic process	67	26	PF3D7_0106100,PF3D7_0206700,PF3D7_0217900,PF3D7_0406100,PF3D7_0412300,PF3D7_0520600,PF3D7_0624000,PF3D7_0626800,PF3D7_0627800,PF3D7_0915400,PF3D7_0920800,PF3D7_1012400,PF3D7_1012600,PF3D7_1015900,PF3D7_1024300,PF3D7_1102400,PF3D7_1120100,PF3D7_1311900,PF3D7_1320800,PF3D7_1329400,PF3D7_1366500,PF3D7_1420600,PF3D7_1436000,PF3D7_1437400,PF3D7_1444800,PF3D7_1462800,	38.8	1.76	2.27	0.00136103	0.0170453	1
GO:0042274	ribosomal small subunit biogenesis	49	19	PF3D7_0106700,PF3D7_0310500,PF3D7_0418700,PF3D7_0422400,PF3D7_0719700,PF3D7_0721600,PF3D7_0802300,PF3D7_0813900,PF3D7_1020700,PF3D7_1026800,PF3D7_1123900,PF3D7_1144000,PF3D7_1302800,PF3D7_1317800,PF3D7_1325000,PF3D7_1408600,PF3D7_1410300,PF3D7_1451900,PF3D7_1461300,	38.8	1.76	2.26	0.00588329	0.0483533	1
GO:0055086	nucleobase-containing small molecule metabolic process	114	44	PF3D7_0106100,PF3D7_0206700,PF3D7_0217900,PF3D7_0412300,PF3D7_0417200,PF3D7_0512700,PF3D7_0513300,PF3D7_0520600,PF3D7_0624000,PF3D7_0626800,PF3D7_0627800,PF3D7_0629100,PF3D7_0717400,PF3D7_0802600,PF3D7_0915400,PF3D7_0920800,PF3D7_0926700,PF3D7_1008900,PF3D7_1012400,PF3D7_1012600,PF3D7_1015800,PF3D7_1015900,PF3D7_1024300,PF3D7_1029600,PF3D7_1033100,PF3D7_1102400,PF3D7_1120100,PF3D7_1127100,PF3D7_1…	38.6	1.75	2.27	4.02929e-05	0.000978187	0.0635822
GO:0072522	purine-containing compound biosynthetic process	44	17	PF3D7_0106100,PF3D7_0206700,PF3D7_0412300,PF3D7_0520600,PF3D7_0627800,PF3D7_0920800,PF3D7_1012400,PF3D7_1012600,PF3D7_1024300,PF3D7_1029600,PF3D7_1033100,PF3D7_1102400,PF3D7_1325100,PF3D7_1329400,PF3D7_1366500,PF3D7_1420600,PF3D7_1437400,	38.6	1.75	2.24	0.00933542	0.0662362	1
GO:0022613	ribonucleoprotein complex biogenesis	247	95	PF3D7_0106700,PF3D7_0218500,PF3D7_0302100,PF3D7_0302900,PF3D7_0303100,PF3D7_0307200,PF3D7_0308600,PF3D7_0310500,PF3D7_0403700,PF3D7_0405400,PF3D7_0410400,PF3D7_0418200,PF3D7_0418700,PF3D7_0422400,PF3D7_0515000,PF3D7_0517000,PF3D7_0517700,PF3D7_0520700,PF3D7_0521700,PF3D7_0529500,PF3D7_0602100,PF3D7_0624200,PF3D7_0627900,PF3D7_0716800,PF3D7_0719600,PF3D7_0719700,PF3D7_0720000,PF3D7_0721600,PF3D7_0…	38.5	1.74	2.32	1.60773e-09	1.58562e-07	2.53699e-06
GO:0072521	purine-containing compound metabolic process	78	30	PF3D7_0106100,PF3D7_0206700,PF3D7_0217900,PF3D7_0412300,PF3D7_0513300,PF3D7_0520600,PF3D7_0624000,PF3D7_0626800,PF3D7_0627800,PF3D7_0915400,PF3D7_0920800,PF3D7_1008900,PF3D7_1012400,PF3D7_1012600,PF3D7_1015900,PF3D7_1024300,PF3D7_1029600,PF3D7_1033100,PF3D7_1102400,PF3D7_1120100,PF3D7_1239000,PF3D7_1320800,PF3D7_1325100,PF3D7_1329400,PF3D7_1366500,PF3D7_1420600,PF3D7_1436000,PF3D7_1437400,PF3D7_1…	38.5	1.74	2.24	0.000713181	0.0096188	1
GO:0051649	establishment of localization in cell	252	95	PF3D7_0103100,PF3D7_0106800,PF3D7_0205400,PF3D7_0208100,PF3D7_0211200,PF3D7_0214100,PF3D7_0216400,PF3D7_0302900,PF3D7_0303000,PF3D7_0304200,PF3D7_0305500,PF3D7_0310700,PF3D7_0316500,PF3D7_0404300,PF3D7_0405100,PF3D7_0415000,PF3D7_0415400,PF3D7_0416800,PF3D7_0419600,PF3D7_0502000,PF3D7_0505100,PF3D7_0513800,PF3D7_0515300,PF3D7_0524000,PF3D7_0528100,PF3D7_0606700,PF3D7_0613500,PF3D7_0613700,PF3D7_0…	37.7	1.71	2.25	5.46063e-09	5.06875e-07	8.61688e-06
GO:0006886	intracellular protein transport	166	62	PF3D7_0106800,PF3D7_0208100,PF3D7_0211200,PF3D7_0214100,PF3D7_0216400,PF3D7_0302900,PF3D7_0405100,PF3D7_0415000,PF3D7_0415400,PF3D7_0416800,PF3D7_0419600,PF3D7_0502000,PF3D7_0513800,PF3D7_0524000,PF3D7_0528100,PF3D7_0606700,PF3D7_0613500,PF3D7_0613700,PF3D7_0617000,PF3D7_0619400,PF3D7_0621800,PF3D7_0621900,PF3D7_0627700,PF3D7_0706000,PF3D7_0730200,PF3D7_0807300,PF3D7_0812400,PF3D7_0815200,PF3D7_0…	37.3	1.69	2.17	3.96409e-06	0.000145473	0.00625533
GO:0046907	intracellular transport	248	92	PF3D7_0103100,PF3D7_0106800,PF3D7_0205400,PF3D7_0208100,PF3D7_0211200,PF3D7_0214100,PF3D7_0216400,PF3D7_0302900,PF3D7_0303000,PF3D7_0304200,PF3D7_0305500,PF3D7_0310700,PF3D7_0404300,PF3D7_0405100,PF3D7_0415000,PF3D7_0415400,PF3D7_0416800,PF3D7_0419600,PF3D7_0502000,PF3D7_0505100,PF3D7_0513800,PF3D7_0515300,PF3D7_0524000,PF3D7_0528100,PF3D7_0606700,PF3D7_0613500,PF3D7_0613700,PF3D7_0613900,PF3D7_0…	37.1	1.68	2.18	2.44069e-08	1.9257e-06	3.8514e-05
GO:0009410	response to xenobiotic stimulus	135	50	PF3D7_0109800,PF3D7_0110600,PF3D7_0217500,PF3D7_0312400,PF3D7_0417200,PF3D7_0509800,PF3D7_0513300,PF3D7_0515300,PF3D7_0525100,PF3D7_0613800,PF3D7_0616800,PF3D7_0624000,PF3D7_0627800,PF3D7_0709700,PF3D7_0810800,PF3D7_0823300,PF3D7_0827800,PF3D7_0907700,PF3D7_0915400,PF3D7_0917900,PF3D7_0925700,PF3D7_1007700,PF3D7_1008700,PF3D7_1012400,PF3D7_1012700,PF3D7_1012900,PF3D7_1019900,PF3D7_1022600,PF3D7_1…	37	1.68	2.13	4.44326e-05	0.00106234	0.0701147
GO:0006457	protein folding	103	38	PF3D7_0213100,PF3D7_0214000,PF3D7_0306200,PF3D7_0306800,PF3D7_0308200,PF3D7_0308600,PF3D7_0320300,PF3D7_0322000,PF3D7_0512000,PF3D7_0608700,PF3D7_0621800,PF3D7_0708000,PF3D7_0708400,PF3D7_0708800,PF3D7_0718500,PF3D7_0804800,PF3D7_0818900,PF3D7_0904500,PF3D7_0907300,PF3D7_0917900,PF3D7_1015600,PF3D7_1107500,PF3D7_1118200,PF3D7_1128100,PF3D7_1132200,PF3D7_1215300,PF3D7_1229500,PF3D7_1247400,PF3D7_1…	36.9	1.67	2.1	0.000393804	0.00640641	0.621422
GO:0000278	mitotic cell cycle	73	27	PF3D7_0107000,PF3D7_0107800,PF3D7_0316500,PF3D7_0317200,PF3D7_0411900,PF3D7_0414000,PF3D7_0422300,PF3D7_0501800,PF3D7_0527000,PF3D7_0607600,PF3D7_0619400,PF3D7_0629800,PF3D7_0630300,PF3D7_0717500,PF3D7_0803700,PF3D7_0903700,PF3D7_0917000,PF3D7_1008700,PF3D7_1107400,PF3D7_1130700,PF3D7_1317100,PF3D7_1355100,PF3D7_1356800,PF3D7_1417800,PF3D7_1433500,PF3D7_1443600,PF3D7_1446600,	37	1.67	2.1	0.00253283	0.0241385	1
GO:0006163	purine nucleotide metabolic process	74	27	PF3D7_0106100,PF3D7_0206700,PF3D7_0217900,PF3D7_0412300,PF3D7_0520600,PF3D7_0624000,PF3D7_0626800,PF3D7_0627800,PF3D7_0915400,PF3D7_0920800,PF3D7_1008900,PF3D7_1012400,PF3D7_1012600,PF3D7_1015900,PF3D7_1024300,PF3D7_1102400,PF3D7_1120100,PF3D7_1239000,PF3D7_1320800,PF3D7_1325100,PF3D7_1329400,PF3D7_1366500,PF3D7_1420600,PF3D7_1436000,PF3D7_1437400,PF3D7_1444800,PF3D7_1462800,	36.5	1.65	2.05	0.00316851	0.0292392	1
GO:0006399	tRNA metabolic process	113	41	PF3D7_0102900,PF3D7_0109800,PF3D7_0211800,PF3D7_0410400,PF3D7_0524900,PF3D7_0612600,PF3D7_0621500,PF3D7_0622800,PF3D7_0627900,PF3D7_0709600,PF3D7_0717400,PF3D7_0717700,PF3D7_0807900,PF3D7_0821600,PF3D7_0908600,PF3D7_0912800,PF3D7_1020700,PF3D7_1034900,PF3D7_1104000,PF3D7_1105700,PF3D7_1120500,PF3D7_1127100,PF3D7_1205100,PF3D7_1213800,PF3D7_1218600,PF3D7_1248000,PF3D7_1307000,PF3D7_1315700,PF3D7_1…	36.3	1.64	2.05	0.000354082	0.00600797	0.558741
GO:0019693	ribose phosphate metabolic process	75	27	PF3D7_0106100,PF3D7_0206700,PF3D7_0217900,PF3D7_0412300,PF3D7_0512700,PF3D7_0520600,PF3D7_0624000,PF3D7_0626800,PF3D7_0627800,PF3D7_0915400,PF3D7_0920800,PF3D7_1012400,PF3D7_1012600,PF3D7_1015900,PF3D7_1024300,PF3D7_1102400,PF3D7_1120100,PF3D7_1320800,PF3D7_1325100,PF3D7_1329400,PF3D7_1366500,PF3D7_1410200,PF3D7_1420600,PF3D7_1436000,PF3D7_1437400,PF3D7_1444800,PF3D7_1462800,	36	1.63	2.01	0.00393428	0.035476	1
GO:0009259	ribonucleotide metabolic process	73	26	PF3D7_0106100,PF3D7_0206700,PF3D7_0217900,PF3D7_0412300,PF3D7_0512700,PF3D7_0520600,PF3D7_0624000,PF3D7_0626800,PF3D7_0627800,PF3D7_0915400,PF3D7_0920800,PF3D7_1012400,PF3D7_1012600,PF3D7_1015900,PF3D7_1024300,PF3D7_1102400,PF3D7_1120100,PF3D7_1320800,PF3D7_1329400,PF3D7_1366500,PF3D7_1410200,PF3D7_1420600,PF3D7_1436000,PF3D7_1437400,PF3D7_1444800,PF3D7_1462800,	35.6	1.61	1.98	0.00543853	0.0449319	1
GO:0006412	translation	188	66	PF3D7_0306900,PF3D7_0307100,PF3D7_0307200,PF3D7_0316800,PF3D7_0317600,PF3D7_0322900,PF3D7_0415900,PF3D7_0422400,PF3D7_0503800,PF3D7_0507100,PF3D7_0516200,PF3D7_0516900,PF3D7_0517000,PF3D7_0519400,PF3D7_0520000,PF3D7_0610900,PF3D7_0705700,PF3D7_0719600,PF3D7_0719700,PF3D7_0721600,PF3D7_0813900,PF3D7_0814000,PF3D7_0815600,PF3D7_0821700,PF3D7_0903900,PF3D7_1003500,PF3D7_1004000,PF3D7_1019400,PF3D7_1…	35.1	1.59	1.97	2.13297e-05	0.00063506	0.0336582
GO:0019637	organophosphate metabolic process	184	64	PF3D7_0106100,PF3D7_0110600,PF3D7_0206700,PF3D7_0209100,PF3D7_0217900,PF3D7_0303200,PF3D7_0412300,PF3D7_0417200,PF3D7_0509800,PF3D7_0511800,PF3D7_0512700,PF3D7_0515300,PF3D7_0520600,PF3D7_0610800,PF3D7_0621200,PF3D7_0624000,PF3D7_0626800,PF3D7_0627800,PF3D7_0629100,PF3D7_0705500,PF3D7_0709700,PF3D7_0802600,PF3D7_0820200,PF3D7_0915400,PF3D7_0920800,PF3D7_0926700,PF3D7_1008000,PF3D7_1008900,PF3D7_1…	34.8	1.58	1.94	3.9517e-05	0.000978187	0.0623579
GO:0019752	carboxylic acid metabolic process	161	56	PF3D7_0102900,PF3D7_0109800,PF3D7_0211800,PF3D7_0309500,PF3D7_0405700,PF3D7_0417200,PF3D7_0525100,PF3D7_0608800,PF3D7_0616800,PF3D7_0619500,PF3D7_0621200,PF3D7_0622800,PF3D7_0623000,PF3D7_0624000,PF3D7_0626800,PF3D7_0717700,PF3D7_0731600,PF3D7_0802000,PF3D7_0807900,PF3D7_0810800,PF3D7_0906500,PF3D7_0910400,PF3D7_0915400,PF3D7_0922400,PF3D7_0922600,PF3D7_1012600,PF3D7_1015900,PF3D7_1033100,PF3D7_1…	34.8	1.58	1.93	0.000119771	0.00239238	0.188998
GO:0043436	oxoacid metabolic process	164	57	PF3D7_0102900,PF3D7_0109800,PF3D7_0211800,PF3D7_0309500,PF3D7_0316300,PF3D7_0405700,PF3D7_0417200,PF3D7_0525100,PF3D7_0608800,PF3D7_0616800,PF3D7_0619500,PF3D7_0621200,PF3D7_0622800,PF3D7_0623000,PF3D7_0624000,PF3D7_0626800,PF3D7_0717700,PF3D7_0731600,PF3D7_0802000,PF3D7_0807900,PF3D7_0810800,PF3D7_0906500,PF3D7_0910400,PF3D7_0915400,PF3D7_0922400,PF3D7_0922600,PF3D7_1012600,PF3D7_1015900,PF3D7_1…	34.8	1.57	1.93	0.000106808	0.00230882	0.168544
GO:0006082	organic acid metabolic process	164	57	PF3D7_0102900,PF3D7_0109800,PF3D7_0211800,PF3D7_0309500,PF3D7_0316300,PF3D7_0405700,PF3D7_0417200,PF3D7_0525100,PF3D7_0608800,PF3D7_0616800,PF3D7_0619500,PF3D7_0621200,PF3D7_0622800,PF3D7_0623000,PF3D7_0624000,PF3D7_0626800,PF3D7_0717700,PF3D7_0731600,PF3D7_0802000,PF3D7_0807900,PF3D7_0810800,PF3D7_0906500,PF3D7_0910400,PF3D7_0915400,PF3D7_0922400,PF3D7_0922600,PF3D7_1012600,PF3D7_1015900,PF3D7_1…	34.8	1.57	1.93	0.000106808	0.00230882	0.168544
GO:0006508	proteolysis	227	78	PF3D7_0108000,PF3D7_0205900,PF3D7_0207500,PF3D7_0207700,PF3D7_0212900,PF3D7_0305700,PF3D7_0312300,PF3D7_0314700,PF3D7_0317000,PF3D7_0317300,PF3D7_0317700,PF3D7_0317800,PF3D7_0321500,PF3D7_0413600,PF3D7_0413900,PF3D7_0507700,PF3D7_0516700,PF3D7_0518300,PF3D7_0527200,PF3D7_0603400,PF3D7_0608500,PF3D7_0619400,PF3D7_0629800,PF3D7_0630600,PF3D7_0707700,PF3D7_0726500,PF3D7_0727400,PF3D7_0801700,PF3D7_0…	34.4	1.56	1.91	9.40393e-06	0.000315732	0.0148394
GO:0006281	DNA repair	115	39	PF3D7_0107800,PF3D7_0110400,PF3D7_0218000,PF3D7_0219600,PF3D7_0305600,PF3D7_0305700,PF3D7_0308600,PF3D7_0317700,PF3D7_0409600,PF3D7_0416400,PF3D7_0505500,PF3D7_0513600,PF3D7_0517400,PF3D7_0527000,PF3D7_0605800,PF3D7_0628600,PF3D7_0630300,PF3D7_0705400,PF3D7_0904800,PF3D7_0934100,PF3D7_1011700,PF3D7_1017000,PF3D7_1106000,PF3D7_1107400,PF3D7_1111100,PF3D7_1123800,PF3D7_1211700,PF3D7_1226600,PF3D7_1…	33.9	1.54	1.84	0.00214532	0.0233522	1
GO:0018193	peptidyl-amino acid modification	110	36	PF3D7_0110500,PF3D7_0217500,PF3D7_0317200,PF3D7_0322000,PF3D7_0416400,PF3D7_0627800,PF3D7_0628600,PF3D7_0629700,PF3D7_0704400,PF3D7_0717500,PF3D7_0804800,PF3D7_0823300,PF3D7_0829400,PF3D7_0934800,PF3D7_1003300,PF3D7_1008100,PF3D7_1103600,PF3D7_1106000,PF3D7_1108400,PF3D7_1115200,PF3D7_1121900,PF3D7_1136500,PF3D7_1144500,PF3D7_1148000,PF3D7_1224500,PF3D7_1237000,PF3D7_1244100,PF3D7_1247400,PF3D7_1…	32.7	1.48	1.74	0.00603885	0.0493746	1
GO:0006396	RNA processing	360	117	PF3D7_0106700,PF3D7_0109200,PF3D7_0209200,PF3D7_0218500,PF3D7_0218700,PF3D7_0302000,PF3D7_0302100,PF3D7_0303100,PF3D7_0307200,PF3D7_0308600,PF3D7_0310500,PF3D7_0321800,PF3D7_0403700,PF3D7_0405400,PF3D7_0410400,PF3D7_0418700,PF3D7_0422500,PF3D7_0503300,PF3D7_0513200,PF3D7_0515000,PF3D7_0517300,PF3D7_0520300,PF3D7_0520700,PF3D7_0521700,PF3D7_0522800,PF3D7_0524900,PF3D7_0526500,PF3D7_0531400,PF3D7_0…	32.5	1.47	1.78	1.35252e-06	7.11423e-05	0.00213427
GO:0090407	organophosphate biosynthetic process	130	42	PF3D7_0106100,PF3D7_0110600,PF3D7_0206700,PF3D7_0412300,PF3D7_0417200,PF3D7_0509800,PF3D7_0511800,PF3D7_0512700,PF3D7_0515300,PF3D7_0520600,PF3D7_0621200,PF3D7_0627800,PF3D7_0629100,PF3D7_0802600,PF3D7_0820200,PF3D7_0920800,PF3D7_0926700,PF3D7_1008000,PF3D7_1012400,PF3D7_1012600,PF3D7_1015800,PF3D7_1024300,PF3D7_1029600,PF3D7_1102400,PF3D7_1123100,PF3D7_1124600,PF3D7_1127100,PF3D7_1224000,PF3D7_1…	32.3	1.46	1.71	0.00412193	0.0369568	1
GO:0042254	ribosome biogenesis	193	61	PF3D7_0106700,PF3D7_0302900,PF3D7_0303100,PF3D7_0307200,PF3D7_0310500,PF3D7_0410400,PF3D7_0418700,PF3D7_0422400,PF3D7_0517000,PF3D7_0521700,PF3D7_0602100,PF3D7_0627900,PF3D7_0719600,PF3D7_0719700,PF3D7_0720000,PF3D7_0721600,PF3D7_0725300,PF3D7_0729300,PF3D7_0802300,PF3D7_0806000,PF3D7_0813900,PF3D7_0921800,PF3D7_1008800,PF3D7_1020700,PF3D7_1026800,PF3D7_1027800,PF3D7_1111000,PF3D7_1117700,PF3D7_1…	31.6	1.43	1.67	0.00113048	0.0143862	1
GO:0006796	phosphate-containing compound metabolic process	325	101	PF3D7_0106100,PF3D7_0110600,PF3D7_0206700,PF3D7_0209100,PF3D7_0217500,PF3D7_0217900,PF3D7_0302100,PF3D7_0303200,PF3D7_0309000,PF3D7_0312400,PF3D7_0316300,PF3D7_0317200,PF3D7_0410300,PF3D7_0412300,PF3D7_0415300,PF3D7_0417200,PF3D7_0503500,PF3D7_0509800,PF3D7_0511800,PF3D7_0512700,PF3D7_0515300,PF3D7_0520600,PF3D7_0610800,PF3D7_0621200,PF3D7_0624000,PF3D7_0626800,PF3D7_0627800,PF3D7_0629100,PF3D7_0…	31.1	1.41	1.65	6.15577e-05	0.0014328	0.097138
GO:0006793	phosphorus metabolic process	333	101	PF3D7_0106100,PF3D7_0110600,PF3D7_0206700,PF3D7_0209100,PF3D7_0217500,PF3D7_0217900,PF3D7_0302100,PF3D7_0303200,PF3D7_0309000,PF3D7_0312400,PF3D7_0316300,PF3D7_0317200,PF3D7_0410300,PF3D7_0412300,PF3D7_0415300,PF3D7_0417200,PF3D7_0503500,PF3D7_0509800,PF3D7_0511800,PF3D7_0512700,PF3D7_0515300,PF3D7_0520600,PF3D7_0610800,PF3D7_0621200,PF3D7_0624000,PF3D7_0626800,PF3D7_0627800,PF3D7_0629100,PF3D7_0…	30.3	1.37	1.59	0.000175837	0.00317308	0.27747
GO:0006464	cellular protein modification process	375	103	PF3D7_0110500,PF3D7_0212900,PF3D7_0217500,PF3D7_0302100,PF3D7_0305700,PF3D7_0308600,PF3D7_0309000,PF3D7_0312400,PF3D7_0317200,PF3D7_0322000,PF3D7_0410300,PF3D7_0413900,PF3D7_0415300,PF3D7_0416400,PF3D7_0503500,PF3D7_0516700,PF3D7_0520700,PF3D7_0527200,PF3D7_0612600,PF3D7_0627800,PF3D7_0628600,PF3D7_0629700,PF3D7_0629800,PF3D7_0630600,PF3D7_0704400,PF3D7_0707700,PF3D7_0715300,PF3D7_0717500,PF3D7_0…	27.5	1.24	1.37	0.00618392	0.0500422	1
GO:0036211	protein modification process	375	103	PF3D7_0110500,PF3D7_0212900,PF3D7_0217500,PF3D7_0302100,PF3D7_0305700,PF3D7_0308600,PF3D7_0309000,PF3D7_0312400,PF3D7_0317200,PF3D7_0322000,PF3D7_0410300,PF3D7_0413900,PF3D7_0415300,PF3D7_0416400,PF3D7_0503500,PF3D7_0516700,PF3D7_0520700,PF3D7_0527200,PF3D7_0612600,PF3D7_0627800,PF3D7_0628600,PF3D7_0629700,PF3D7_0629800,PF3D7_0630600,PF3D7_0704400,PF3D7_0707700,PF3D7_0715300,PF3D7_0717500,PF3D7_0…	27.5	1.24	1.37	0.00618392	0.0500422	1

## Sheet: Cellular component 
ID	Name	Bgd count	Result count	Result gene list	Pct of bgd	Fold enrichment	Odds ratio	P-value	Benjamini	Bonferroni
GO:0022624	proteasome accessory complex	18	18	PF3D7_0205900,PF3D7_0312300,PF3D7_0317800,PF3D7_0413600,PF3D7_0807800,PF3D7_0907700,PF3D7_0912900,PF3D7_1008400,PF3D7_1017900,PF3D7_1030500,PF3D7_1130400,PF3D7_1248900,PF3D7_1306400,PF3D7_1311500,PF3D7_1368100,PF3D7_1402300,PF3D7_1414000,PF3D7_1466300,	100	4.53	inf	1.39495e-12	5.30081e-11	6.89106e-10
GO:0005838	proteasome regulatory particle	17	17	PF3D7_0205900,PF3D7_0312300,PF3D7_0317800,PF3D7_0413600,PF3D7_0807800,PF3D7_0912900,PF3D7_1008400,PF3D7_1017900,PF3D7_1030500,PF3D7_1130400,PF3D7_1248900,PF3D7_1306400,PF3D7_1311500,PF3D7_1368100,PF3D7_1402300,PF3D7_1414000,PF3D7_1466300,	100	4.53	inf	6.39594e-12	1.99793e-10	3.1596e-09
GO:0008540	proteasome regulatory particle, base subcomplex	9	9	PF3D7_0205900,PF3D7_0413600,PF3D7_0807800,PF3D7_1008400,PF3D7_1130400,PF3D7_1248900,PF3D7_1306400,PF3D7_1311500,PF3D7_1466300,	100	4.53	inf	1.21661e-06	1.62434e-05	0.000601007
GO:0005832	chaperonin-containing T-complex	8	8	PF3D7_0214000,PF3D7_0306800,PF3D7_0308200,PF3D7_0320300,PF3D7_0608700,PF3D7_1132200,PF3D7_1229500,PF3D7_1357800,	100	4.53	inf	5.54146e-06	5.59522e-05	0.00273748
GO:0101031	chaperone complex	8	8	PF3D7_0214000,PF3D7_0306800,PF3D7_0308200,PF3D7_0320300,PF3D7_0608700,PF3D7_1132200,PF3D7_1229500,PF3D7_1357800,	100	4.53	inf	5.54146e-06	5.59522e-05	0.00273748
GO:0030137	COPI-coated vesicle	7	7	PF3D7_0415400,PF3D7_0606700,PF3D7_0808400,PF3D7_0905900,PF3D7_1134800,PF3D7_1145100,PF3D7_1429800,	100	4.53	inf	2.52219e-05	0.000192709	0.0124596
GO:0030126	COPI vesicle coat	7	7	PF3D7_0415400,PF3D7_0606700,PF3D7_0808400,PF3D7_0905900,PF3D7_1134800,PF3D7_1145100,PF3D7_1429800,	100	4.53	inf	2.52219e-05	0.000192709	0.0124596
GO:0030663	COPI-coated vesicle membrane	7	7	PF3D7_0415400,PF3D7_0606700,PF3D7_0808400,PF3D7_0905900,PF3D7_1134800,PF3D7_1145100,PF3D7_1429800,	100	4.53	inf	2.52219e-05	0.000192709	0.0124596
GO:0016272	prefoldin complex	7	7	PF3D7_0512000,PF3D7_0718500,PF3D7_0904500,PF3D7_0907300,PF3D7_1107500,PF3D7_1128100,PF3D7_1416900,	100	4.53	inf	2.52219e-05	0.000192709	0.0124596
GO:0019773	proteasome core complex, alpha-subunit complex	7	7	PF3D7_0317000,PF3D7_0608500,PF3D7_0727400,PF3D7_0807500,PF3D7_1353800,PF3D7_1353900,PF3D7_1474800,	100	4.53	inf	2.52219e-05	0.000192709	0.0124596
GO:0005851	eukaryotic translation initiation factor 2B complex	6	6	PF3D7_0728000,PF3D7_0828500,PF3D7_1013900,PF3D7_1213900,PF3D7_1250600,PF3D7_1326400,	100	4.53	inf	0.000114714	0.000735956	0.0566686
GO:0030127	COPII vesicle coat	6	6	PF3D7_0214100,PF3D7_0405100,PF3D7_0416800,PF3D7_0822600,PF3D7_1230700,PF3D7_1361100,	100	4.53	inf	0.000114714	0.000735956	0.0566686
GO:0070971	endoplasmic reticulum exit site	6	6	PF3D7_0214100,PF3D7_0405100,PF3D7_0416800,PF3D7_0822600,PF3D7_1230700,PF3D7_1361100,	100	4.53	inf	0.000114714	0.000735956	0.0566686
GO:0008541	proteasome regulatory particle, lid subcomplex	6	6	PF3D7_0312300,PF3D7_1017900,PF3D7_1030500,PF3D7_1368100,PF3D7_1402300,PF3D7_1414000,	100	4.53	inf	0.000114714	0.000735956	0.0566686
GO:0005956	protein kinase CK2 complex	4	4	PF3D7_0317200,PF3D7_1103700,PF3D7_1108400,PF3D7_1342400,	100	4.53	inf	0.00236777	0.0112469	1
GO:0035861	site of double-strand break	4		PF3D7_0107800,PF3D7_0605800,PF3D7_1033500,PF3D7_1442100,	100	4.53	inf	0.00236777	0.0112469	1
GO:0090734	site of DNA damage	4	4	PF3D7_0107800,PF3D7_0605800,PF3D7_1033500,PF3D7_1442100,	100	4.53	inf	0.00236777	0.0112469	1
GO:0071541	eukaryotic translation initiation factor 3 complex, eIF3m	4	4	PF3D7_0418200,PF3D7_0716800,PF3D7_0918300,PF3D7_1212700,	100	4.53	inf	0.00236777	0.0112469	1
GO:0005839	proteasome core complex	15	14	PF3D7_0108000,PF3D7_0317000,PF3D7_0518300,PF3D7_0608500,PF3D7_0727400,PF3D7_0803800,PF3D7_0807500,PF3D7_0931800,PF3D7_1011400,PF3D7_1328100,PF3D7_1353800,PF3D7_1353900,PF3D7_1470900,PF3D7_1474800,	93.3	4.23	50.04	7.32853e-09	1.57404e-07	3.62029e-06
GO:0000502	proteasome complex	42	38	PF3D7_0108000,PF3D7_0205900,PF3D7_0312300,PF3D7_0317000,PF3D7_0317800,PF3D7_0413600,PF3D7_0413900,PF3D7_0518300,PF3D7_0528000,PF3D7_0608500,PF3D7_0723600,PF3D7_0727400,PF3D7_0803800,PF3D7_0807500,PF3D7_0807800,PF3D7_0907400,PF3D7_0907700,PF3D7_0912900,PF3D7_0931800,PF3D7_1008400,PF3D7_1011400,PF3D7_1017900,PF3D7_1030500,PF3D7_1129200,PF3D7_1130400,PF3D7_1248900,PF3D7_1306400,PF3D7_1311500,PF3D7_1…	90.5	4.1	34.71	3.09683e-21	3.82458e-19	1.52983e-18
GO:0043601	nuclear replisome	9	8	PF3D7_0308000,PF3D7_0409600,PF3D7_0411900,PF3D7_0904800,PF3D7_1017000,PF3D7_1438700,PF3D7_1442100,PF3D7_1463300,	88.9	4.03	28.43	4.01402e-05	0.000283275	0.0198293
GO:0030894	replisome	9	8	PF3D7_0308000,PF3D7_0409600,PF3D7_0411900,PF3D7_0904800,PF3D7_1017000,PF3D7_1438700,PF3D7_1442100,PF3D7_1463300,	88.9	4.03	28.43	4.01402e-05	0.000283275	0.0198293
GO:0033180	proton-transporting V-type ATPase, V1 domain	7	6	PF3D7_0106100,PF3D7_0406100,PF3D7_1306600,PF3D7_1311900,PF3D7_1323200,PF3D7_1341900,	85.7	3.88	21.28	0.000651665	0.00361711	0.321923
GO:0022627	cytosolic small ribosomal subunit	37	31	PF3D7_0306900,PF3D7_0307100,PF3D7_0316800,PF3D7_0317600,PF3D7_0322900,PF3D7_0422400,PF3D7_0516200,PF3D7_0519400,PF3D7_0520000,PF3D7_0705700,PF3D7_0719700,PF3D7_0721600,PF3D7_0813900,PF3D7_0826700,PF3D7_1003500,PF3D7_1019000,PF3D7_1026800,PF3D7_1105400,PF3D7_1144000,PF3D7_1242700,PF3D7_1302800,PF3D7_1317800,PF3D7_1342000,PF3D7_1358800,PF3D7_1408600,PF3D7_1421200,PF3D7_1431700,PF3D7_1438000,PF3D7_1…	83.8	3.79	18.74	1.87482e-15	8.41964e-14	9.2616e-13
GO:0005687	U4 snRNP	6	5	PF3D7_0822300,PF3D7_0909800,PF3D7_1125500,PF3D7_1350200,PF3D7_1414800,	83.3	3.77	17.72	0.00255458	0.011369	1
GO:0005663	DNA replication factor C complex	6	5	PF3D7_0218000,PF3D7_0219600,PF3D7_1111100,PF3D7_1241700,PF3D7_1463200,	83.3	3.77	17.72	0.00255458	0.011369	1
GO:0000221	vacuolar proton-transporting V-type ATPase, V1 domain	6	5	PF3D7_0106100,PF3D7_1306600,PF3D7_1311900,PF3D7_1323200,PF3D7_1341900,	83.3	3.77	17.72	0.00255458	0.011369	1
GO:0005853	eukaryotic translation elongation factor 1 complex	6	5	PF3D7_0319600,PF3D7_0913200,PF3D7_1123400,PF3D7_1338300,PF3D7_1357000,	83.3	3.77	17.72	0.00255458	0.011369	1
GO:0000407	phagophore assembly site	6	5	PF3D7_0505100,PF3D7_0515300,PF3D7_1012900,PF3D7_1126100,PF3D7_1430400,	83.3	3.77	17.72	0.00255458	0.011369	1
GO:0005682	U5 snRNP	11	9	PF3D7_0218500,PF3D7_0405400,PF3D7_0822300,PF3D7_0909800,PF3D7_1125500,PF3D7_1126900,PF3D7_1231500,PF3D7_1350200,PF3D7_1414800,	81.8	3.71	16.0	4.31228e-05	0.000300038	0.0213027
GO:1905369	endopeptidase complex	47	38	PF3D7_0108000,PF3D7_0205900,PF3D7_0312300,PF3D7_0317000,PF3D7_0317800,PF3D7_0413600,PF3D7_0413900,PF3D7_0518300,PF3D7_0528000,PF3D7_0608500,PF3D7_0723600,PF3D7_0727400,PF3D7_0803800,PF3D7_0807500,PF3D7_0807800,PF3D7_0907400,PF3D7_0907700,PF3D7_0912900,PF3D7_0931800,PF3D7_1008400,PF3D7_1011400,PF3D7_1017900,PF3D7_1030500,PF3D7_1129200,PF3D7_1130400,PF3D7_1248900,PF3D7_1306400,PF3D7_1311500,PF3D7_1…	80.9	3.66	15.41	1.16583e-17	8.2274e-16	5.75918e-15
GO:0005798	Golgi-associated vesicle	15	12	PF3D7_0415400,PF3D7_0606700,PF3D7_0730200,PF3D7_0808400,PF3D7_0905900,PF3D7_1134800,PF3D7_1145100,PF3D7_1219100,PF3D7_1247500,PF3D7_1429800,PF3D7_1435500,PF3D7_1455500,	80	3.62	14.26	2.96607e-06	3.385e-05	0.00146524
GO:0005736	RNA polymerase I complex	10	8	PF3D7_0303300,PF3D7_0509400,PF3D7_0708100,PF3D7_1134700,PF3D7_1143300,PF3D7_1213700,PF3D7_1364800,PF3D7_1415200,	80	3.62	14.21	0.000161645	0.000939445	0.0798528
GO:0042555	MCM complex	10	8	PF3D7_0527000,PF3D7_0705400,PF3D7_0717500,PF3D7_1211700,PF3D7_1317100,PF3D7_1355100,PF3D7_1412100,PF3D7_1417800,	80	3.62	14.21	0.000161645	0.000939445	0.0798528
GO:0071012	catalytic step 1 spliceosome	5	4	PF3D7_0308600,PF3D7_0515000,PF3D7_1033600,PF3D7_1248200,	80	3.62	14.16	0.00975344	0.0365015	1
GO:0071007	U2-type catalytic step 2 spliceosome	5	4	PF3D7_0403700,PF3D7_0515000,PF3D7_1003800,PF3D7_1248200,	80	3.62	14.16	0.00975344	0.0365015	1
GO:0071006	U2-type catalytic step 1 spliceosome	5	4	PF3D7_0308600,PF3D7_0515000,PF3D7_1033600,PF3D7_1248200,	80	3.62	14.16	0.00975344	0.0365015	1
GO:0016281	eukaryotic translation initiation factor 4F complex	5	4	PF3D7_0315100,PF3D7_0422700,PF3D7_1107300,PF3D7_1468700,	80	3.62	14.16	0.00975344	0.0365015	1
GO:0005666	RNA polymerase III complex	14	11	PF3D7_0303300,PF3D7_0708100,PF3D7_1104700,PF3D7_1143300,PF3D7_1206600,PF3D7_1213700,PF3D7_1329000,PF3D7_1364800,PF3D7_1415200,PF3D7_1421400,PF3D7_1458800,	78.6	3.56	13.06	1.0885e-05	9.34186e-05	0.00537717
GO:0016592	mediator complex	14	11	PF3D7_0411100,PF3D7_0520200,PF3D7_0707600,PF3D7_0709300,PF3D7_0822100,PF3D7_1107500,PF3D7_1126400,PF3D7_1213200,PF3D7_1465200,PF3D7_1469700,PF3D7_1475000,	78.6	3.56	13.06	1.0885e-05	9.34186e-05	0.00537717
GO:0030660	Golgi-associated vesicle membrane	14	11	PF3D7_0415400,PF3D7_0606700,PF3D7_0730200,PF3D7_0808400,PF3D7_0905900,PF3D7_1134800,PF3D7_1145100,PF3D7_1219100,PF3D7_1429800,PF3D7_1435500,PF3D7_1455500,	78.6	3.56	13.06	1.0885e-05	9.34186e-05	0.00537717
GO:0030120	vesicle coat	23	18	PF3D7_0214100,PF3D7_0405100,PF3D7_0415400,PF3D7_0416800,PF3D7_0606700,PF3D7_0730200,PF3D7_0808400,PF3D7_0822600,PF3D7_0905900,PF3D7_1134800,PF3D7_1145100,PF3D7_1219100,PF3D7_1230700,PF3D7_1311400,PF3D7_1361100,PF3D7_1429800,PF3D7_1435500,PF3D7_1455500,	78.3	3.54	12.9	1.47901e-08	2.92253e-07	7.30633e-06
GO:0005685	U1 snRNP	13	10	PF3D7_0218500,PF3D7_0812700,PF3D7_0822300,PF3D7_0909800,PF3D7_0935000,PF3D7_1125500,PF3D7_1126900,PF3D7_1350200,PF3D7_1367100,PF3D7_1414800,	76.9	3.48	11.86	3.92432e-05	0.000283275	0.0193861
GO:0030117	membrane coat	32	24	PF3D7_0214100,PF3D7_0405100,PF3D7_0415400,PF3D7_0416800,PF3D7_0528100,PF3D7_0606700,PF3D7_0613500,PF3D7_0730200,PF3D7_0808400,PF3D7_0822600,PF3D7_0904100,PF3D7_0905900,PF3D7_1110500,PF3D7_1119500,PF3D7_1134800,PF3D7_1145100,PF3D7_1219100,PF3D7_1230700,PF3D7_1311400,PF3D7_1361100,PF3D7_1429800,PF3D7_1435500,PF3D7_1440700,PF3D7_1455500,	75	3.4	10.8	2.40422e-10	6.59826e-09	1.18769e-07
GO:0048475	coated membrane	32	24	PF3D7_0214100,PF3D7_0405100,PF3D7_0415400,PF3D7_0416800,PF3D7_0528100,PF3D7_0606700,PF3D7_0613500,PF3D7_0730200,PF3D7_0808400,PF3D7_0822600,PF3D7_0904100,PF3D7_0905900,PF3D7_1110500,PF3D7_1119500,PF3D7_1134800,PF3D7_1145100,PF3D7_1219100,PF3D7_1230700,PF3D7_1311400,PF3D7_1361100,PF3D7_1429800,PF3D7_1435500,PF3D7_1440700,PF3D7_1455500,	75	3.4	10.8	2.40422e-10	6.59826e-09	1.18769e-07
GO:0005852	eukaryotic translation initiation factor 3 complex	12	9	PF3D7_0418200,PF3D7_0517700,PF3D7_0716800,PF3D7_0815600,PF3D7_0918300,PF3D7_1007900,PF3D7_1206200,PF3D7_1212700,PF3D7_1419700,	75	3.4	10.67	0.000138593	0.000842593	0.0684651
GO:0005665	RNA polymerase II, core complex	12	9	PF3D7_0110400,PF3D7_0215700,PF3D7_0303300,PF3D7_0318200,PF3D7_0708100,PF3D7_0923000,PF3D7_1213700,PF3D7_1304900,PF3D7_1364800,	75	3.4	10.67	0.000138593	0.000842593	0.0684651
GO:0000176	nuclear exosome (RNase complex)	8	6	PF3D7_0209200,PF3D7_0410400,PF3D7_0720000,PF3D7_1307000,PF3D7_1359300,PF3D7_1364500,	75	3.4	10.64	0.0021177	0.010785	1
GO:1905368	peptidase complex	51	38	PF3D7_0108000,PF3D7_0205900,PF3D7_0312300,PF3D7_0317000,PF3D7_0317800,PF3D7_0413600,PF3D7_0413900,PF3D7_0518300,PF3D7_0528000,PF3D7_0608500,PF3D7_0723600,PF3D7_0727400,PF3D7_0803800,PF3D7_0807500,PF3D7_0807800,PF3D7_0907400,PF3D7_0907700,PF3D7_0912900,PF3D7_0931800,PF3D7_1008400,PF3D7_1011400,PF3D7_1017900,PF3D7_1030500,PF3D7_1129200,PF3D7_1130400,PF3D7_1248900,PF3D7_1306400,PF3D7_1311500,PF3D7_1…	74.5	3.37	10.65	1.59332e-15	7.87098e-14	7.87098e-13
GO:0005643	nuclear pore	15	11	PF3D7_0419600,PF3D7_0524000,PF3D7_0627700,PF3D7_0706000,PF3D7_0812400,PF3D7_0815200,PF3D7_0910100,PF3D7_1230700,PF3D7_1446500,PF3D7_1456700,PF3D7_1473700,	73.3	3.32	9.79	3.26619e-05	0.000240821	0.016135
GO:0033290	eukaryotic 48S preinitiation complex	11	8	PF3D7_0418200,PF3D7_0517700,PF3D7_0716800,PF3D7_0728000,PF3D7_0815600,PF3D7_1007900,PF3D7_1206200,PF3D7_1212700,	72.7	3.29	9.47	0.000477706	0.00268167	0.235987
GO:1902555	endoribonuclease complex	7	5	PF3D7_0621500,PF3D7_0627900,PF3D7_0709600,PF3D7_0821600,PF3D7_1248000,	71.4	3.23	8.86	0.00731187	0.0288965	1
GO:0000812	Swr1 complex	7	5	PF3D7_0628600,PF3D7_0719300,PF3D7_0820000,PF3D7_1106000,PF3D7_1362200,	71.4	3.23	8.86	0.00731187	0.0288965	1
GO:0010494	cytoplasmic stress granule	7	5	PF3D7_0320800,PF3D7_0422500,PF3D7_1435700,PF3D7_1459000,PF3D7_1468700,	71.4	3.23	8.86	0.00731187	0.0288965	1
GO:0045495	pole plasm	7	5	PF3D7_0315100,PF3D7_0810600,PF3D7_0822300,PF3D7_1224300,PF3D7_1409800,	71.4	3.23	8.86	0.00731187	0.0288965	1
GO:0060293	germ plasm	7	5	PF3D7_0315100,PF3D7_0810600,PF3D7_0822300,PF3D7_1224300,PF3D7_1409800,	71.4	3.23	8.86	0.00731187	0.0288965	1
GO:0043186	P granule	7	5	PF3D7_0315100,PF3D7_0810600,PF3D7_0822300,PF3D7_1224300,PF3D7_1409800,	71.4	3.23	8.86	0.00731187	0.0288965	1
GO:0097346	INO80-type complex	7	5	PF3D7_0628600,PF3D7_0719300,PF3D7_0820000,PF3D7_1106000,PF3D7_1362200,	71.4	3.23	8.86	0.00731187	0.0288965	1
GO:0045293	mRNA editing complex	17	12	PF3D7_0209800,PF3D7_0520000,PF3D7_0524000,PF3D7_0624000,PF3D7_0707200,PF3D7_1006200,PF3D7_1020900,PF3D7_1036900,PF3D7_1229500,PF3D7_1230800,PF3D7_1235500,PF3D7_1366300,	70.6	3.2	8.55	2.57465e-05	0.000192709	0.0127188
GO:0036396	RNA N6-methyladenosine methyltransferase complex	17	12	PF3D7_0209800,PF3D7_0520000,PF3D7_0524000,PF3D7_0624000,PF3D7_0707200,PF3D7_1006200,PF3D7_1020900,PF3D7_1036900,PF3D7_1229500,PF3D7_1230800,PF3D7_1235500,PF3D7_1366300,	70.6	3.2	8.55	2.57465e-05	0.000192709	0.0127188
GO:0000974	Prp19 complex	10	7	PF3D7_0302000,PF3D7_0308600,PF3D7_0403700,PF3D7_0515000,PF3D7_0614400,PF3D7_1033600,PF3D7_1248200,	70	3.17	8.28	0.0015993	0.00849523	0.790056
GO:0022626	cytosolic ribosome	92	62	PF3D7_0306900,PF3D7_0307100,PF3D7_0307200,PF3D7_0316800,PF3D7_0317600,PF3D7_0322900,PF3D7_0415900,PF3D7_0422400,PF3D7_0503800,PF3D7_0507100,PF3D7_0516200,PF3D7_0516900,PF3D7_0517000,PF3D7_0519400,PF3D7_0520000,PF3D7_0705700,PF3D7_0719600,PF3D7_0719700,PF3D7_0721600,PF3D7_0813900,PF3D7_0814000,PF3D7_0821700,PF3D7_0826700,PF3D7_0903900,PF3D7_1003500,PF3D7_1004000,PF3D7_1019000,PF3D7_1019400,PF3D7_1…	67.4	3.05	7.68	7.24091e-21	7.15402e-19	3.57701e-18
GO:0070993	translation preinitiation complex	12	8	PF3D7_0418200,PF3D7_0517700,PF3D7_0716800,PF3D7_0728000,PF3D7_0815600,PF3D7_1007900,PF3D7_1206200,PF3D7_1212700,	66.7	3.02	7.1	0.00115593	0.00627505	0.571029
GO:0016471	vacuolar proton-transporting V-type ATPase complex	9	6	PF3D7_0106100,PF3D7_1306600,PF3D7_1311900,PF3D7_1323200,PF3D7_1341900,PF3D7_1464700,	66.7	3.02	7.09	0.00516723	0.0223913	1
GO:0030662	coated vesicle membrane	28	18	PF3D7_0214100,PF3D7_0405100,PF3D7_0415400,PF3D7_0416800,PF3D7_0606700,PF3D7_0730200,PF3D7_0808400,PF3D7_0822600,PF3D7_0905900,PF3D7_1134800,PF3D7_1145100,PF3D7_1219100,PF3D7_1230700,PF3D7_1311400,PF3D7_1361100,PF3D7_1429800,PF3D7_1435500,PF3D7_1455500,	64.3	2.91	6.44	1.82467e-06	2.31125e-05	0.000901387
GO:0097526	spliceosomal tri-snRNP complex	25	16	PF3D7_0218500,PF3D7_0520300,PF3D7_0819900,PF3D7_0822300,PF3D7_0909800,PF3D7_1003800,PF3D7_1110200,PF3D7_1123900,PF3D7_1125500,PF3D7_1126900,PF3D7_1209200,PF3D7_1231500,PF3D7_1325000,PF3D7_1343900,PF3D7_1350200,PF3D7_1414800,	64	2.9	6.35	7.61218e-06	7.09512e-05	0.00376042
GO:0016282	eukaryotic 43S preinitiation complex	11	7	PF3D7_0418200,PF3D7_0517700,PF3D7_0716800,PF3D7_0815600,PF3D7_1007900,PF3D7_1206200,PF3D7_1212700,	63.6	2.88	6.21	0.0035621	0.0157114	1
GO:0046540	U4/U6 x U5 tri-snRNP complex	21	13	PF3D7_0218500,PF3D7_0520300,PF3D7_0819900,PF3D7_0822300,PF3D7_1003800,PF3D7_1110200,PF3D7_1123900,PF3D7_1126900,PF3D7_1231500,PF3D7_1325000,PF3D7_1343900,PF3D7_1350200,PF3D7_1414800,	61.9	2.8	5.79	9.36466e-05	0.000633718	0.0462614
GO:0005732	sno(s)RNA-containing ribonucleoprotein complex	28	17	PF3D7_0520300,PF3D7_0621500,PF3D7_0627900,PF3D7_0709600,PF3D7_0819900,PF3D7_0822300,PF3D7_0822800,PF3D7_1008800,PF3D7_1118500,PF3D7_1123900,PF3D7_1126900,PF3D7_1209200,PF3D7_1309500,PF3D7_1325000,PF3D7_1350200,PF3D7_1407100,PF3D7_1417500,	60.7	2.75	5.52	1.09682e-05	9.34186e-05	0.00541828
GO:0015935	small ribosomal subunit	53	32	PF3D7_0306900,PF3D7_0307100,PF3D7_0316800,PF3D7_0317600,PF3D7_0322900,PF3D7_0422400,PF3D7_0516200,PF3D7_0519400,PF3D7_0520000,PF3D7_0705700,PF3D7_0719700,PF3D7_0721600,PF3D7_0813900,PF3D7_0826700,PF3D7_1003500,PF3D7_1019000,PF3D7_1026800,PF3D7_1105400,PF3D7_1126200,PF3D7_1144000,PF3D7_1242700,PF3D7_1302800,PF3D7_1317800,PF3D7_1342000,PF3D7_1358800,PF3D7_1408600,PF3D7_1421200,PF3D7_1431700,PF3D7_1…	60.4	2.73	5.51	1.64455e-09	4.06204e-08	8.12408e-07
GO:0036464	cytoplasmic ribonucleoprotein granule	30	18	PF3D7_0315100,PF3D7_0320800,PF3D7_0422500,PF3D7_0507600,PF3D7_0520300,PF3D7_0606600,PF3D7_0810600,PF3D7_0811300,PF3D7_0819900,PF3D7_0822300,PF3D7_1032100,PF3D7_1224300,PF3D7_1325000,PF3D7_1409800,PF3D7_1417200,PF3D7_1435700,PF3D7_1459000,PF3D7_1468700,	60	2.72	5.37	7.59856e-06	7.09512e-05	0.00375369
GO:0035770	ribonucleoprotein granule	30	18	PF3D7_0315100,PF3D7_0320800,PF3D7_0422500,PF3D7_0507600,PF3D7_0520300,PF3D7_0606600,PF3D7_0810600,PF3D7_0811300,PF3D7_0819900,PF3D7_0822300,PF3D7_1032100,PF3D7_1224300,PF3D7_1325000,PF3D7_1409800,PF3D7_1417200,PF3D7_1435700,PF3D7_1459000,PF3D7_1468700,	60	2.72	5.37	7.59856e-06	7.09512e-05	0.00375369
GO:0043596	nuclear replication fork	15	9	PF3D7_0308000,PF3D7_0409600,PF3D7_0411900,PF3D7_0904800,PF3D7_1017000,PF3D7_1357500,PF3D7_1438700,PF3D7_1442100,PF3D7_1463300,	60	2.72	5.33	0.00164165	0.00853659	0.810976
GO:0099023	vesicle tethering complex	15	9	PF3D7_0103100,PF3D7_0310700,PF3D7_0502000,PF3D7_0505100,PF3D7_0727000,PF3D7_1130500,PF3D7_1239900,PF3D7_1309700,PF3D7_1465100,	60	2.72	5.33	0.00164165	0.00853659	0.810976
GO:0071013	catalytic step 2 spliceosome	37	22	PF3D7_0218500,PF3D7_0302000,PF3D7_0308600,PF3D7_0403700,PF3D7_0405400,PF3D7_0422700,PF3D7_0515000,PF3D7_0520300,PF3D7_0614400,PF3D7_0819900,PF3D7_0822300,PF3D7_0822800,PF3D7_0909800,PF3D7_1003800,PF3D7_1110200,PF3D7_1125500,PF3D7_1126900,PF3D7_1209200,PF3D7_1220100,PF3D7_1248200,PF3D7_1352700,PF3D7_1414800,	59.5	2.69	5.26	8.99035e-07	1.26892e-05	0.000444123
GO:0022625	cytosolic large ribosomal subunit	54	32	PF3D7_0307200,PF3D7_0415900,PF3D7_0503800,PF3D7_0507100,PF3D7_0516900,PF3D7_0517000,PF3D7_0719600,PF3D7_0814000,PF3D7_0821700,PF3D7_0903900,PF3D7_1004000,PF3D7_1019400,PF3D7_1027800,PF3D7_1103100,PF3D7_1130100,PF3D7_1130200,PF3D7_1142600,PF3D7_1309100,PF3D7_1323100,PF3D7_1323400,PF3D7_1331800,PF3D7_1338200,PF3D7_1341200,PF3D7_1365900,PF3D7_1414300,PF3D7_1424100,PF3D7_1424400,PF3D7_1426000,PF3D7_1…	59.3	2.68	5.26	3.19396e-09	7.51342e-08	1.57782e-06
GO:0005657	replication fork	24	14	PF3D7_0218000,PF3D7_0219600,PF3D7_0308000,PF3D7_0409600,PF3D7_0411900,PF3D7_0904800,PF3D7_1017000,PF3D7_1111100,PF3D7_1241700,PF3D7_1357500,PF3D7_1438700,PF3D7_1442100,PF3D7_1463200,PF3D7_1463300,	58.3	2.64	4.99	0.000124414	0.000777979	0.0614604
GO:0033176	proton-transporting V-type ATPase complex	12	7	PF3D7_0106100,PF3D7_0406100,PF3D7_1306600,PF3D7_1311900,PF3D7_1323200,PF3D7_1341900,PF3D7_1464700,	58.3	2.64	4.97	0.00693075	0.0288965	1
GO:0070603	SWI/SNF superfamily-type complex	12	7	PF3D7_0628600,PF3D7_0719300,PF3D7_0820000,PF3D7_1103600,PF3D7_1106000,PF3D7_1362200,PF3D7_1422800,	58.3	2.64	4.97	0.00693075	0.0288965	1
GO:1904949	ATPase complex	12	7	PF3D7_0628600,PF3D7_0719300,PF3D7_0820000,PF3D7_1103600,PF3D7_1106000,PF3D7_1362200,PF3D7_1422800,	58.3	2.64	4.97	0.00693075	0.0288965	1
GO:0030135	coated vesicle	35	20	PF3D7_0214100,PF3D7_0405100,PF3D7_0415400,PF3D7_0416800,PF3D7_0606700,PF3D7_0613500,PF3D7_0730200,PF3D7_0808400,PF3D7_0822600,PF3D7_0905900,PF3D7_1134800,PF3D7_1145100,PF3D7_1219100,PF3D7_1230700,PF3D7_1247500,PF3D7_1311400,PF3D7_1361100,PF3D7_1429800,PF3D7_1435500,PF3D7_1455500,	57.1	2.59	4.77	6.68422e-06	6.60401e-05	0.003302
GO:0055029	nuclear DNA-directed RNA polymerase complex	44	25	PF3D7_0110400,PF3D7_0215700,PF3D7_0303300,PF3D7_0318200,PF3D7_0411900,PF3D7_0509400,PF3D7_0520700,PF3D7_0704400,PF3D7_0708100,PF3D7_0923000,PF3D7_0929000,PF3D7_1104700,PF3D7_1134700,PF3D7_1143300,PF3D7_1206600,PF3D7_1213700,PF3D7_1250700,PF3D7_1304900,PF3D7_1329000,PF3D7_1364800,PF3D7_1415200,PF3D7_1421400,PF3D7_1438700,PF3D7_1458800,PF3D7_1463300,	56.8	2.57	4.73	5.37738e-07	8.85475e-06	0.000265643
GO:0030880	RNA polymerase complex	46	26	PF3D7_0110400,PF3D7_0215700,PF3D7_0303300,PF3D7_0318200,PF3D7_0411900,PF3D7_0509400,PF3D7_0520700,PF3D7_0704400,PF3D7_0708100,PF3D7_0923000,PF3D7_0929000,PF3D7_1104700,PF3D7_1134700,PF3D7_1143300,PF3D7_1206600,PF3D7_1213700,PF3D7_1250700,PF3D7_1304900,PF3D7_1329000,PF3D7_1364800,PF3D7_1404000,PF3D7_1415200,PF3D7_1421400,PF3D7_1438700,PF3D7_1458800,PF3D7_1463300,	56.5	2.56	4.68	3.65817e-07	6.23151e-06	0.000180714
GO:0012506	vesicle membrane	39	22	PF3D7_0214100,PF3D7_0405100,PF3D7_0415400,PF3D7_0416800,PF3D7_0606700,PF3D7_0727000,PF3D7_0730200,PF3D7_0808400,PF3D7_0822600,PF3D7_0905900,PF3D7_0906100,PF3D7_1134800,PF3D7_1145100,PF3D7_1219100,PF3D7_1226400,PF3D7_1230700,PF3D7_1309700,PF3D7_1311400,PF3D7_1361100,PF3D7_1429800,PF3D7_1435500,PF3D7_1455500,	56.4	2.55	4.64	3.0835e-06	3.385e-05	0.00152325
GO:0030659	cytoplasmic vesicle membrane	39	22	PF3D7_0214100,PF3D7_0405100,PF3D7_0415400,PF3D7_0416800,PF3D7_0606700,PF3D7_0727000,PF3D7_0730200,PF3D7_0808400,PF3D7_0822600,PF3D7_0905900,PF3D7_0906100,PF3D7_1134800,PF3D7_1145100,PF3D7_1219100,PF3D7_1226400,PF3D7_1230700,PF3D7_1309700,PF3D7_1311400,PF3D7_1361100,PF3D7_1429800,PF3D7_1435500,PF3D7_1455500,	56.4	2.55	4.64	3.0835e-06	3.385e-05	0.00152325
GO:0000428	DNA-directed RNA polymerase complex	45	25	PF3D7_0110400,PF3D7_0215700,PF3D7_0303300,PF3D7_0318200,PF3D7_0411900,PF3D7_0509400,PF3D7_0520700,PF3D7_0704400,PF3D7_0708100,PF3D7_0923000,PF3D7_0929000,PF3D7_1104700,PF3D7_1134700,PF3D7_1143300,PF3D7_1206600,PF3D7_1213700,PF3D7_1250700,PF3D7_1304900,PF3D7_1329000,PF3D7_1364800,PF3D7_1415200,PF3D7_1421400,PF3D7_1438700,PF3D7_1458800,PF3D7_1463300,	55.6	2.52	4.49	9.58981e-07	1.31593e-05	0.000473736
GO:0030658	transport vesicle membrane	18	10	PF3D7_0214100,PF3D7_0405100,PF3D7_0416800,PF3D7_0730200,PF3D7_0822600,PF3D7_1219100,PF3D7_1230700,PF3D7_1361100,PF3D7_1435500,PF3D7_1455500,	55.6	2.52	4.44	0.00200154	0.0102996	0.988758
GO:0005829	cytosol	385	213	PF3D7_0102900,PF3D7_0103100,PF3D7_0106800,PF3D7_0109800,PF3D7_0204100,PF3D7_0209100,PF3D7_0212300,PF3D7_0213100,PF3D7_0214000,PF3D7_0304200,PF3D7_0305500,PF3D7_0306200,PF3D7_0306800,PF3D7_0306900,PF3D7_0307100,PF3D7_0307200,PF3D7_0308200,PF3D7_0309500,PF3D7_0312300,PF3D7_0316300,PF3D7_0316800,PF3D7_0317200,PF3D7_0317600,PF3D7_0319600,PF3D7_0320300,PF3D7_0322000,PF3D7_0322900,PF3D7_0413600,PF3D7_0…	55.3	2.51	5.2	3.72248e-50	9.19452e-48	1.8389e-47
GO:0005635	nuclear envelope	26	14	PF3D7_0419600,PF3D7_0524000,PF3D7_0627700,PF3D7_0706000,PF3D7_0812400,PF3D7_0815200,PF3D7_0910100,PF3D7_0932800,PF3D7_1027700,PF3D7_1145400,PF3D7_1230700,PF3D7_1446500,PF3D7_1456700,PF3D7_1473700,	53.8	2.44	4.16	0.000390529	0.00221748	0.192921
GO:0030119	AP-type membrane coat adaptor complex	15	8	PF3D7_0528100,PF3D7_0613500,PF3D7_0730200,PF3D7_0904100,PF3D7_1119500,PF3D7_1311400,PF3D7_1440700,PF3D7_1455500,	53.3	2.42	4.06	0.00792325	0.0310642	1
GO:0061695	transferase complex, transferring phosphorus-containing groups	59	31	PF3D7_0110400,PF3D7_0215700,PF3D7_0303300,PF3D7_0308000,PF3D7_0318200,PF3D7_0411900,PF3D7_0415300,PF3D7_0509400,PF3D7_0515300,PF3D7_0520700,PF3D7_0704400,PF3D7_0708100,PF3D7_0915400,PF3D7_0923000,PF3D7_0929000,PF3D7_1104700,PF3D7_1134700,PF3D7_1143300,PF3D7_1206600,PF3D7_1213700,PF3D7_1250700,PF3D7_1304900,PF3D7_1325100,PF3D7_1329000,PF3D7_1364800,PF3D7_1404000,PF3D7_1415200,PF3D7_1421400,PF3D7_1…	52.5	2.38	3.99	2.58516e-07	4.56095e-06	0.000127707
GO:0140535	intracellular protein-containing complex	189	97	PF3D7_0108000,PF3D7_0110400,PF3D7_0110500,PF3D7_0205900,PF3D7_0215700,PF3D7_0302000,PF3D7_0303300,PF3D7_0308000,PF3D7_0310700,PF3D7_0312300,PF3D7_0317000,PF3D7_0317200,PF3D7_0317700,PF3D7_0317800,PF3D7_0318200,PF3D7_0411900,PF3D7_0413600,PF3D7_0413900,PF3D7_0505100,PF3D7_0507600,PF3D7_0509400,PF3D7_0518300,PF3D7_0519500,PF3D7_0520700,PF3D7_0528000,PF3D7_0608500,PF3D7_0628600,PF3D7_0629800,PF3D7_0…	51.3	2.32	3.99	2.18009e-19	1.79494e-17	1.07697e-16
GO:0000228	nuclear chromosome	39	20	PF3D7_0308000,PF3D7_0409600,PF3D7_0411900,PF3D7_0414000,PF3D7_0605800,PF3D7_0628600,PF3D7_0630300,PF3D7_0705300,PF3D7_0719300,PF3D7_0820000,PF3D7_0904800,PF3D7_1017000,PF3D7_1106000,PF3D7_1107400,PF3D7_1130700,PF3D7_1357500,PF3D7_1362200,PF3D7_1438700,PF3D7_1442100,PF3D7_1463300,	51.3	2.32	3.77	5.65253e-05	0.000387827	0.0279235
GO:0000932	P-body	18	9	PF3D7_0320800,PF3D7_0507600,PF3D7_0520300,PF3D7_0606600,PF3D7_0811300,PF3D7_0819900,PF3D7_1032100,PF3D7_1325000,PF3D7_1417200,	50	2.26	3.55	0.00835463	0.0324975	1
GO:0097525	spliceosomal snRNP complex	47	22	PF3D7_0218500,PF3D7_0405400,PF3D7_0520300,PF3D7_0522800,PF3D7_0812700,PF3D7_0819900,PF3D7_0822300,PF3D7_0909800,PF3D7_0935000,PF3D7_1003800,PF3D7_1110200,PF3D7_1123900,PF3D7_1125500,PF3D7_1126900,PF3D7_1209200,PF3D7_1231500,PF3D7_1234800,PF3D7_1325000,PF3D7_1343900,PF3D7_1350200,PF3D7_1367100,PF3D7_1414800,	46.8	2.12	3.15	0.000141569	0.000842593	0.0699352
GO:0030532	small nuclear ribonucleoprotein complex	47	22	PF3D7_0218500,PF3D7_0405400,PF3D7_0520300,PF3D7_0522800,PF3D7_0812700,PF3D7_0819900,PF3D7_0822300,PF3D7_0909800,PF3D7_0935000,PF3D7_1003800,PF3D7_1110200,PF3D7_1123900,PF3D7_1125500,PF3D7_1126900,PF3D7_1209200,PF3D7_1231500,PF3D7_1234800,PF3D7_1325000,PF3D7_1343900,PF3D7_1350200,PF3D7_1367100,PF3D7_1414800,	46.8	2.12	3.15	0.000141569	0.000842593	0.0699352
GO:0140513	nuclear protein-containing complex	326	151	PF3D7_0107800,PF3D7_0109200,PF3D7_0110400,PF3D7_0110500,PF3D7_0205400,PF3D7_0209200,PF3D7_0215700,PF3D7_0218500,PF3D7_0218700,PF3D7_0302000,PF3D7_0303300,PF3D7_0308000,PF3D7_0308600,PF3D7_0318200,PF3D7_0321800,PF3D7_0403700,PF3D7_0405400,PF3D7_0409600,PF3D7_0410400,PF3D7_0411100,PF3D7_0411900,PF3D7_0414000,PF3D7_0419600,PF3D7_0422500,PF3D7_0422700,PF3D7_0503300,PF3D7_0505500,PF3D7_0509400,PF3D7_0…	46.3	2.1	3.38	6.25065e-24	1.02927e-21	3.08782e-21
GO:0016591	RNA polymerase II, holoenzyme	28	13	PF3D7_0110400,PF3D7_0215700,PF3D7_0303300,PF3D7_0318200,PF3D7_0520700,PF3D7_0704400,PF3D7_0708100,PF3D7_0923000,PF3D7_0929000,PF3D7_1213700,PF3D7_1250700,PF3D7_1304900,PF3D7_1364800,	46.4	2.1	3.08	0.00361015	0.0157824	1
GO:1903561	extracellular vesicle	91	42	PF3D7_0102200,PF3D7_0302500,PF3D7_0317600,PF3D7_0322900,PF3D7_0422400,PF3D7_0424600,PF3D7_0516200,PF3D7_0608500,PF3D7_0608800,PF3D7_0619400,PF3D7_0621200,PF3D7_0708400,PF3D7_0727400,PF3D7_0814200,PF3D7_0818200,PF3D7_0818900,PF3D7_0826700,PF3D7_0905400,PF3D7_0917900,PF3D7_0922200,PF3D7_1006200,PF3D7_1035700,PF3D7_1105000,PF3D7_1105400,PF3D7_1108400,PF3D7_1117700,PF3D7_1130200,PF3D7_1219100,PF3D7_1…	46.2	2.09	3.11	2.39751e-07	4.38656e-06	0.000118437
GO:0120114	Sm-like protein family complex	48	22	PF3D7_0218500,PF3D7_0405400,PF3D7_0520300,PF3D7_0522800,PF3D7_0812700,PF3D7_0819900,PF3D7_0822300,PF3D7_0909800,PF3D7_0935000,PF3D7_1003800,PF3D7_1110200,PF3D7_1123900,PF3D7_1125500,PF3D7_1126900,PF3D7_1209200,PF3D7_1231500,PF3D7_1234800,PF3D7_1325000,PF3D7_1343900,PF3D7_1350200,PF3D7_1367100,PF3D7_1414800,	45.8	2.08	3.03	0.000207659	0.00119283	0.102583
GO:0044391	ribosomal subunit	142	64	PF3D7_0306900,PF3D7_0307100,PF3D7_0307200,PF3D7_0316800,PF3D7_0317600,PF3D7_0322900,PF3D7_0415900,PF3D7_0422400,PF3D7_0503800,PF3D7_0507100,PF3D7_0516200,PF3D7_0516900,PF3D7_0517000,PF3D7_0519400,PF3D7_0520000,PF3D7_0705700,PF3D7_0719600,PF3D7_0719700,PF3D7_0721600,PF3D7_0813900,PF3D7_0814000,PF3D7_0821700,PF3D7_0826700,PF3D7_0903900,PF3D7_1003500,PF3D7_1004000,PF3D7_1019000,PF3D7_1019400,PF3D7_1…	45.1	2.04	3.02	5.41726e-10	1.40849e-08	2.67613e-07
GO:0030139	endocytic vesicle	102	46	PF3D7_0102200,PF3D7_0106800,PF3D7_0211200,PF3D7_0303000,PF3D7_0416800,PF3D7_0512600,PF3D7_0515300,PF3D7_0524000,PF3D7_0608800,PF3D7_0708400,PF3D7_0709300,PF3D7_0813300,PF3D7_0814200,PF3D7_0818200,PF3D7_0818900,PF3D7_0912900,PF3D7_0917900,PF3D7_0920800,PF3D7_0922200,PF3D7_0934500,PF3D7_1006200,PF3D7_1006800,PF3D7_1008700,PF3D7_1012900,PF3D7_1015600,PF3D7_1015900,PF3D7_1020900,PF3D7_1116100,PF3D7_1…	45.1	2.04	2.98	1.50939e-07	2.86785e-06	7.4564e-05
GO:0045335	phagocytic vesicle	97	43	PF3D7_0102200,PF3D7_0303000,PF3D7_0416800,PF3D7_0512600,PF3D7_0515300,PF3D7_0524000,PF3D7_0608800,PF3D7_0708400,PF3D7_0709300,PF3D7_0813300,PF3D7_0814200,PF3D7_0818200,PF3D7_0818900,PF3D7_0912900,PF3D7_0917900,PF3D7_0920800,PF3D7_0922200,PF3D7_0934500,PF3D7_1006200,PF3D7_1006800,PF3D7_1008700,PF3D7_1012900,PF3D7_1015600,PF3D7_1015900,PF3D7_1020900,PF3D7_1116100,PF3D7_1117700,PF3D7_1145400,PF3D7_1…	44.3	2.01	2.89	6.92375e-07	1.00598e-05	0.000342033
GO:0005767	secondary lysosome	97	43	PF3D7_0102200,PF3D7_0303000,PF3D7_0416800,PF3D7_0512600,PF3D7_0515300,PF3D7_0524000,PF3D7_0608800,PF3D7_0708400,PF3D7_0709300,PF3D7_0813300,PF3D7_0814200,PF3D7_0818200,PF3D7_0818900,PF3D7_0912900,PF3D7_0917900,PF3D7_0920800,PF3D7_0922200,PF3D7_0934500,PF3D7_1006200,PF3D7_1006800,PF3D7_1008700,PF3D7_1012900,PF3D7_1015600,PF3D7_1015900,PF3D7_1020900,PF3D7_1116100,PF3D7_1117700,PF3D7_1145400,PF3D7_1…	44.3	2.01	2.89	6.92375e-07	1.00598e-05	0.000342033
GO:0032010	phagolysosome	97	43	PF3D7_0102200,PF3D7_0303000,PF3D7_0416800,PF3D7_0512600,PF3D7_0515300,PF3D7_0524000,PF3D7_0608800,PF3D7_0708400,PF3D7_0709300,PF3D7_0813300,PF3D7_0814200,PF3D7_0818200,PF3D7_0818900,PF3D7_0912900,PF3D7_0917900,PF3D7_0920800,PF3D7_0922200,PF3D7_0934500,PF3D7_1006200,PF3D7_1006800,PF3D7_1008700,PF3D7_1012900,PF3D7_1015600,PF3D7_1015900,PF3D7_1020900,PF3D7_1116100,PF3D7_1117700,PF3D7_1145400,PF3D7_1…	44.3	2.01	2.89	6.92375e-07	1.00598e-05	0.000342033
GO:0020020	food vacuole	97	43	PF3D7_0102200,PF3D7_0303000,PF3D7_0416800,PF3D7_0512600,PF3D7_0515300,PF3D7_0524000,PF3D7_0608800,PF3D7_0708400,PF3D7_0709300,PF3D7_0813300,PF3D7_0814200,PF3D7_0818200,PF3D7_0818900,PF3D7_0912900,PF3D7_0917900,PF3D7_0920800,PF3D7_0922200,PF3D7_0934500,PF3D7_1006200,PF3D7_1006800,PF3D7_1008700,PF3D7_1012900,PF3D7_1015600,PF3D7_1015900,PF3D7_1020900,PF3D7_1116100,PF3D7_1117700,PF3D7_1145400,PF3D7_1…	44.3	2.01	2.89	6.92375e-07	1.00598e-05	0.000342033
GO:0000139	Golgi membrane	36	16	PF3D7_0214100,PF3D7_0216400,PF3D7_0405100,PF3D7_0415400,PF3D7_0606700,PF3D7_0615800,PF3D7_0804900,PF3D7_0822600,PF3D7_0905900,PF3D7_1034000,PF3D7_1134800,PF3D7_1145100,PF3D7_1230700,PF3D7_1244600,PF3D7_1361100,PF3D7_1465100,	44.4	2.01	2.85	0.00224896	0.0111768	1
GO:0005768	endosome	41	18	PF3D7_0103100,PF3D7_0106800,PF3D7_0211200,PF3D7_0305500,PF3D7_0502000,PF3D7_0515300,PF3D7_0727000,PF3D7_0903200,PF3D7_0906100,PF3D7_1107200,PF3D7_1110500,PF3D7_1226400,PF3D7_1239900,PF3D7_1250300,PF3D7_1309700,PF3D7_1320600,PF3D7_1340700,PF3D7_1406700,	43.9	1.99	2.79	0.00144338	0.00775032	0.713029
GO:0005634	nucleus	1519	664	PF3D7_0102900,PF3D7_0105800,PF3D7_0106100,PF3D7_0106700,PF3D7_0107800,PF3D7_0108000,PF3D7_0109800,PF3D7_0110400,PF3D7_0110500,PF3D7_0110700,PF3D7_0205400,PF3D7_0205900,PF3D7_0206700,PF3D7_0207500,PF3D7_0208100,PF3D7_0209800,PF3D7_0210200,PF3D7_0211800,PF3D7_0212300,PF3D7_0213100,PF3D7_0214000,PF3D7_0215700,PF3D7_0217500,PF3D7_0217700,PF3D7_0218000,PF3D7_0218700,PF3D7_0219600,PF3D7_0302100,PF3D7_0…	43.7	1.98	5.55	9.08332e-125	4.48716e-122	4.48716e-122
GO:0031410	cytoplasmic vesicle	210	90	PF3D7_0102200,PF3D7_0103100,PF3D7_0106800,PF3D7_0209200,PF3D7_0211200,PF3D7_0214100,PF3D7_0303000,PF3D7_0305500,PF3D7_0405100,PF3D7_0412200,PF3D7_0415400,PF3D7_0416800,PF3D7_0502000,PF3D7_0505100,PF3D7_0512600,PF3D7_0515300,PF3D7_0524000,PF3D7_0606700,PF3D7_0608800,PF3D7_0613500,PF3D7_0613700,PF3D7_0629800,PF3D7_0708400,PF3D7_0709300,PF3D7_0727000,PF3D7_0730200,PF3D7_0808400,PF3D7_0813300,PF3D7_0…	42.9	1.94	2.8	4.68449e-12	1.65296e-10	2.31414e-09
GO:0031982	vesicle	288	123	PF3D7_0102200,PF3D7_0103100,PF3D7_0106800,PF3D7_0209200,PF3D7_0211200,PF3D7_0214100,PF3D7_0302500,PF3D7_0303000,PF3D7_0304200,PF3D7_0305500,PF3D7_0317600,PF3D7_0322900,PF3D7_0405100,PF3D7_0412200,PF3D7_0415400,PF3D7_0416800,PF3D7_0422400,PF3D7_0424600,PF3D7_0502000,PF3D7_0505100,PF3D7_0512600,PF3D7_0515300,PF3D7_0516200,PF3D7_0524000,PF3D7_0606700,PF3D7_0608500,PF3D7_0608800,PF3D7_0613500,PF3D7_0…	42.7	1.93	2.84	4.98738e-16	2.73752e-14	2.46377e-13
GO:0097708	intracellular vesicle	211	90	PF3D7_0102200,PF3D7_0103100,PF3D7_0106800,PF3D7_0209200,PF3D7_0211200,PF3D7_0214100,PF3D7_0303000,PF3D7_0305500,PF3D7_0405100,PF3D7_0412200,PF3D7_0415400,PF3D7_0416800,PF3D7_0502000,PF3D7_0505100,PF3D7_0512600,PF3D7_0515300,PF3D7_0524000,PF3D7_0606700,PF3D7_0608800,PF3D7_0613500,PF3D7_0613700,PF3D7_0629800,PF3D7_0708400,PF3D7_0709300,PF3D7_0727000,PF3D7_0730200,PF3D7_0808400,PF3D7_0813300,PF3D7_0…	42.7	1.93	2.77	6.47102e-12	1.99793e-10	3.19668e-09
GO:0005654	nucleoplasm	97	41	PF3D7_0110400,PF3D7_0110500,PF3D7_0215700,PF3D7_0303300,PF3D7_0308600,PF3D7_0318200,PF3D7_0517300,PF3D7_0517400,PF3D7_0520700,PF3D7_0610900,PF3D7_0628600,PF3D7_0629700,PF3D7_0703200,PF3D7_0704400,PF3D7_0708100,PF3D7_0714500,PF3D7_0719300,PF3D7_0820000,PF3D7_0823300,PF3D7_0907700,PF3D7_0916700,PF3D7_0919000,PF3D7_0923000,PF3D7_0929000,PF3D7_1008100,PF3D7_1011700,PF3D7_1103600,PF3D7_1106000,PF3D7_1…	42.3	1.91	2.65	5.54991e-06	5.59522e-05	0.00274166
GO:0005681	spliceosomal complex	100	42	PF3D7_0218500,PF3D7_0218700,PF3D7_0302000,PF3D7_0308600,PF3D7_0321800,PF3D7_0403700,PF3D7_0405400,PF3D7_0422500,PF3D7_0422700,PF3D7_0503300,PF3D7_0515000,PF3D7_0517300,PF3D7_0520300,PF3D7_0522800,PF3D7_0526500,PF3D7_0531400,PF3D7_0614400,PF3D7_0812700,PF3D7_0819900,PF3D7_0822300,PF3D7_0822800,PF3D7_0909800,PF3D7_1002400,PF3D7_1003800,PF3D7_1033600,PF3D7_1110200,PF3D7_1123900,PF3D7_1125500,PF3D7_1…	42	1.9	2.62	5.19149e-06	5.5752e-05	0.00256459
GO:0005764	lysosome	111	46	PF3D7_0102200,PF3D7_0207500,PF3D7_0207700,PF3D7_0303000,PF3D7_0416800,PF3D7_0512600,PF3D7_0515300,PF3D7_0524000,PF3D7_0608800,PF3D7_0708400,PF3D7_0709300,PF3D7_0813300,PF3D7_0814200,PF3D7_0818200,PF3D7_0818900,PF3D7_0912900,PF3D7_0917900,PF3D7_0920800,PF3D7_0922200,PF3D7_0934500,PF3D7_1006200,PF3D7_1006800,PF3D7_1008700,PF3D7_1012900,PF3D7_1015600,PF3D7_1015900,PF3D7_1020900,PF3D7_1116100,PF3D7_1…	41.4	1.88	2.56	2.88672e-06	3.385e-05	0.00142604
GO:0000323	lytic vacuole	111	46	PF3D7_0102200,PF3D7_0207500,PF3D7_0207700,PF3D7_0303000,PF3D7_0416800,PF3D7_0512600,PF3D7_0515300,PF3D7_0524000,PF3D7_0608800,PF3D7_0708400,PF3D7_0709300,PF3D7_0813300,PF3D7_0814200,PF3D7_0818200,PF3D7_0818900,PF3D7_0912900,PF3D7_0917900,PF3D7_0920800,PF3D7_0922200,PF3D7_0934500,PF3D7_1006200,PF3D7_1006800,PF3D7_1008700,PF3D7_1012900,PF3D7_1015600,PF3D7_1015900,PF3D7_1020900,PF3D7_1116100,PF3D7_1…	41.4	1.88	2.56	2.88672e-06	3.385e-05	0.00142604
GO:0005684	U2-type spliceosomal complex	34	14	PF3D7_0308600,PF3D7_0403700,PF3D7_0515000,PF3D7_0531400,PF3D7_0812700,PF3D7_0822300,PF3D7_0909800,PF3D7_1003800,PF3D7_1033600,PF3D7_1125500,PF3D7_1209200,PF3D7_1248200,PF3D7_1367100,PF3D7_1414800,	41.2	1.86	2.49	0.00943588	0.0364166	1
GO:0005773	vacuole	126	51	PF3D7_0102200,PF3D7_0106100,PF3D7_0207500,PF3D7_0207700,PF3D7_0303000,PF3D7_0416800,PF3D7_0512600,PF3D7_0515300,PF3D7_0524000,PF3D7_0608800,PF3D7_0708400,PF3D7_0709300,PF3D7_0813300,PF3D7_0814200,PF3D7_0818200,PF3D7_0818900,PF3D7_0903200,PF3D7_0912900,PF3D7_0917900,PF3D7_0920800,PF3D7_0922200,PF3D7_0934500,PF3D7_1006200,PF3D7_1006800,PF3D7_1008700,PF3D7_1012900,PF3D7_1015600,PF3D7_1015900,PF3D7_1…	40.5	1.83	2.47	1.9446e-06	2.40158e-05	0.000960631
GO:1990904	ribonucleoprotein complex	381	153	PF3D7_0106700,PF3D7_0218500,PF3D7_0218700,PF3D7_0302000,PF3D7_0306900,PF3D7_0307100,PF3D7_0307200,PF3D7_0308600,PF3D7_0316800,PF3D7_0317600,PF3D7_0321600,PF3D7_0321800,PF3D7_0322900,PF3D7_0403700,PF3D7_0405400,PF3D7_0415900,PF3D7_0418200,PF3D7_0418700,PF3D7_0422400,PF3D7_0422500,PF3D7_0422700,PF3D7_0503300,PF3D7_0503800,PF3D7_0507100,PF3D7_0515000,PF3D7_0516200,PF3D7_0516900,PF3D7_0517000,PF3D7_0…	40.2	1.82	2.59	7.90911e-17	4.88388e-15	3.9071e-14
GO:0098588	bounding membrane of organelle	98	38	PF3D7_0106100,PF3D7_0214100,PF3D7_0216400,PF3D7_0405100,PF3D7_0415400,PF3D7_0416800,PF3D7_0606700,PF3D7_0615800,PF3D7_0617000,PF3D7_0727000,PF3D7_0730200,PF3D7_0804900,PF3D7_0808400,PF3D7_0822600,PF3D7_0905900,PF3D7_0906100,PF3D7_1034000,PF3D7_1134800,PF3D7_1145100,PF3D7_1216500,PF3D7_1219100,PF3D7_1226400,PF3D7_1230700,PF3D7_1244600,PF3D7_1306600,PF3D7_1309700,PF3D7_1311400,PF3D7_1311900,PF3D7_1…	38.8	1.76	2.28	0.000119308	0.00075562	0.0589383
GO:0005840	ribosome	182	68	PF3D7_0306900,PF3D7_0307100,PF3D7_0307200,PF3D7_0309600,PF3D7_0316800,PF3D7_0317600,PF3D7_0322900,PF3D7_0415900,PF3D7_0422400,PF3D7_0503800,PF3D7_0507100,PF3D7_0516200,PF3D7_0516900,PF3D7_0517000,PF3D7_0519400,PF3D7_0520000,PF3D7_0610900,PF3D7_0705700,PF3D7_0719600,PF3D7_0719700,PF3D7_0721600,PF3D7_0813900,PF3D7_0814000,PF3D7_0821700,PF3D7_0826700,PF3D7_0903900,PF3D7_1003500,PF3D7_1004000,PF3D7_1…	37.4	1.69	2.18	1.31988e-06	1.71585e-05	0.000652022
GO:0031981	nuclear lumen	270	99	PF3D7_0110400,PF3D7_0110500,PF3D7_0209200,PF3D7_0210200,PF3D7_0215700,PF3D7_0219600,PF3D7_0303300,PF3D7_0308000,PF3D7_0308600,PF3D7_0310500,PF3D7_0318200,PF3D7_0409600,PF3D7_0410400,PF3D7_0411900,PF3D7_0414000,PF3D7_0422700,PF3D7_0509400,PF3D7_0513200,PF3D7_0517300,PF3D7_0517400,PF3D7_0520700,PF3D7_0602100,PF3D7_0604100,PF3D7_0605800,PF3D7_0610900,PF3D7_0621500,PF3D7_0628600,PF3D7_0629700,PF3D7_0…	36.7	1.66	2.15	1.38938e-08	2.85981e-07	6.86355e-06
GO:0015934	large ribosomal subunit	90	33	PF3D7_0307200,PF3D7_0415900,PF3D7_0503800,PF3D7_0507100,PF3D7_0516900,PF3D7_0517000,PF3D7_0719600,PF3D7_0814000,PF3D7_0821700,PF3D7_0903900,PF3D7_1004000,PF3D7_1019400,PF3D7_1027800,PF3D7_1103100,PF3D7_1111000,PF3D7_1130100,PF3D7_1130200,PF3D7_1142600,PF3D7_1309100,PF3D7_1323100,PF3D7_1323400,PF3D7_1331800,PF3D7_1338200,PF3D7_1341200,PF3D7_1365900,PF3D7_1414300,PF3D7_1424100,PF3D7_1424400,PF3D7_1…	36.7	1.66	2.08	0.00105521	0.00579196	0.521276
GO:0099080	supramolecular complex	85	29	PF3D7_0315100,PF3D7_0316500,PF3D7_0320800,PF3D7_0422300,PF3D7_0422500,PF3D7_0507600,PF3D7_0520300,PF3D7_0606600,PF3D7_0803700,PF3D7_0810600,PF3D7_0811300,PF3D7_0819900,PF3D7_0822300,PF3D7_0903700,PF3D7_1008700,PF3D7_1032100,PF3D7_1213600,PF3D7_1224300,PF3D7_1246200,PF3D7_1322200,PF3D7_1325000,PF3D7_1409800,PF3D7_1412500,PF3D7_1417200,PF3D7_1422800,PF3D7_1435700,PF3D7_1443600,PF3D7_1459000,PF3D7_1…	34.1	1.54	1.85	0.00689271	0.0288965	1
GO:0005794	Golgi apparatus	126	42	PF3D7_0103100,PF3D7_0214100,PF3D7_0216400,PF3D7_0303000,PF3D7_0305500,PF3D7_0310700,PF3D7_0405100,PF3D7_0415400,PF3D7_0416800,PF3D7_0505100,PF3D7_0512600,PF3D7_0606700,PF3D7_0615800,PF3D7_0727000,PF3D7_0730200,PF3D7_0804900,PF3D7_0807300,PF3D7_0808400,PF3D7_0822600,PF3D7_0905900,PF3D7_1017300,PF3D7_1020900,PF3D7_1034000,PF3D7_1037500,PF3D7_1119500,PF3D7_1130500,PF3D7_1134800,PF3D7_1144900,PF3D7_1…	33.3	1.51	1.8	0.00214708	0.010823	1
GO:0044424	obsolete intracellular part	1005	314	PF3D7_0102900,PF3D7_0108000,PF3D7_0109200,PF3D7_0109800,PF3D7_0207100,PF3D7_0209800,PF3D7_0212900,PF3D7_0213500,PF3D7_0216400,PF3D7_0217500,PF3D7_0217700,PF3D7_0218600,PF3D7_0302100,PF3D7_0302900,PF3D7_0303200,PF3D7_0303700,PF3D7_0309000,PF3D7_0310300,PF3D7_0312400,PF3D7_0314700,PF3D7_0316300,PF3D7_0317000,PF3D7_0317300,PF3D7_0317800,PF3D7_0320500,PF3D7_0320800,PF3D7_0321100,PF3D7_0321600,PF3D7_0…	31.2	1.41	1.85	1.59447e-14	6.5639e-13	7.87668e-12
GO:0043232	intracellular non-membrane-bounded organelle	502	150	PF3D7_0105300,PF3D7_0107000,PF3D7_0205900,PF3D7_0209200,PF3D7_0210200,PF3D7_0218600,PF3D7_0303300,PF3D7_0306900,PF3D7_0307100,PF3D7_0307200,PF3D7_0309600,PF3D7_0310500,PF3D7_0315100,PF3D7_0316500,PF3D7_0316800,PF3D7_0317600,PF3D7_0320800,PF3D7_0322900,PF3D7_0414000,PF3D7_0415900,PF3D7_0422300,PF3D7_0422400,PF3D7_0422500,PF3D7_0422700,PF3D7_0503400,PF3D7_0503800,PF3D7_0507100,PF3D7_0507600,PF3D7_0…	29.9	1.35	1.59	1.01929e-05	9.32463e-05	0.0050353
GO:0043228	non-membrane-bounded organelle	504	150	PF3D7_0105300,PF3D7_0107000,PF3D7_0205900,PF3D7_0209200,PF3D7_0210200,PF3D7_0218600,PF3D7_0303300,PF3D7_0306900,PF3D7_0307100,PF3D7_0307200,PF3D7_0309600,PF3D7_0310500,PF3D7_0315100,PF3D7_0316500,PF3D7_0316800,PF3D7_0317600,PF3D7_0320800,PF3D7_0322900,PF3D7_0414000,PF3D7_0415900,PF3D7_0422300,PF3D7_0422400,PF3D7_0422500,PF3D7_0422700,PF3D7_0503400,PF3D7_0503800,PF3D7_0507100,PF3D7_0507600,PF3D7_0…	29.8	1.35	1.58	1.29697e-05	0.000108594	0.00640704
GO:0070013	intracellular organelle lumen	368	104	PF3D7_0110400,PF3D7_0110500,PF3D7_0209200,PF3D7_0210200,PF3D7_0215700,PF3D7_0219600,PF3D7_0303300,PF3D7_0308000,PF3D7_0308600,PF3D7_0310500,PF3D7_0318200,PF3D7_0409600,PF3D7_0410400,PF3D7_0411900,PF3D7_0414000,PF3D7_0422700,PF3D7_0509400,PF3D7_0513200,PF3D7_0517300,PF3D7_0517400,PF3D7_0520700,PF3D7_0602100,PF3D7_0604100,PF3D7_0605800,PF3D7_0606900,PF3D7_0610900,PF3D7_0621500,PF3D7_0628600,PF3D7_0…	28.3	1.28	1.43	0.00226251	0.0111768	1
GO:0043233	organelle lumen	369	104	PF3D7_0110400,PF3D7_0110500,PF3D7_0209200,PF3D7_0210200,PF3D7_0215700,PF3D7_0219600,PF3D7_0303300,PF3D7_0308000,PF3D7_0308600,PF3D7_0310500,PF3D7_0318200,PF3D7_0409600,PF3D7_0410400,PF3D7_0411900,PF3D7_0414000,PF3D7_0422700,PF3D7_0509400,PF3D7_0513200,PF3D7_0517300,PF3D7_0517400,PF3D7_0520700,PF3D7_0602100,PF3D7_0604100,PF3D7_0605800,PF3D7_0606900,PF3D7_0610900,PF3D7_0621500,PF3D7_0628600,PF3D7_0…	28.2	1.28	1.43	0.00249019	0.011369	1
GO:0031974	membrane-enclosed lumen	369	104	PF3D7_0110400,PF3D7_0110500,PF3D7_0209200,PF3D7_0210200,PF3D7_0215700,PF3D7_0219600,PF3D7_0303300,PF3D7_0308000,PF3D7_0308600,PF3D7_0310500,PF3D7_0318200,PF3D7_0409600,PF3D7_0410400,PF3D7_0411900,PF3D7_0414000,PF3D7_0422700,PF3D7_0509400,PF3D7_0513200,PF3D7_0517300,PF3D7_0517400,PF3D7_0520700,PF3D7_0602100,PF3D7_0604100,PF3D7_0605800,PF3D7_0606900,PF3D7_0610900,PF3D7_0621500,PF3D7_0628600,PF3D7_0…	28.2	1.28	1.43	0.00249019	0.011369	1
GO:0005737	cytoplasm	2415	617	PF3D7_0102200,PF3D7_0102900,PF3D7_0103100,PF3D7_0105200,PF3D7_0105300,PF3D7_0106100,PF3D7_0106800,PF3D7_0108000,PF3D7_0109200,PF3D7_0109800,PF3D7_0204100,PF3D7_0205900,PF3D7_0207100,PF3D7_0207500,PF3D7_0207700,PF3D7_0209100,PF3D7_0209200,PF3D7_0209800,PF3D7_0211200,PF3D7_0212300,PF3D7_0212900,PF3D7_0213100,PF3D7_0213500,PF3D7_0214000,PF3D7_0214100,PF3D7_0215700,PF3D7_0216400,PF3D7_0217500,PF3D7_0…	25.5	1.16	1.49	4.28771e-09	9.62787e-08	2.11813e-06

## Sheet: Molecular function
ID	Name	Bgd count	Result count	Result gene list	Pct of bgd	Fold enrichment	Odds ratio	P-value	Benjamini	Bonferroni
GO:0140142	nucleocytoplasmic carrier activity	7	7	PF3D7_0302900,PF3D7_0524000,PF3D7_0627700,PF3D7_0812400,PF3D7_0815200,PF3D7_0910100,PF3D7_0932800,	100	4.53	inf	2.52219e-05	0.000470249	0.0211612
GO:0008139	nuclear localization sequence binding	4	4	PF3D7_0524000,PF3D7_0627700,PF3D7_0812400,PF3D7_0815200,	100	4.53	inf	0.00236777	0.0272094	1
GO:0061608	nuclear import signal receptor activity	4	4	PF3D7_0524000,PF3D7_0627700,PF3D7_0812400,PF3D7_0815200,	100	4.53	inf	0.00236777	0.0272094	1
GO:0071889	14-3-3 protein binding	4	4	PF3D7_0217500,PF3D7_1223100,PF3D7_1420600,PF3D7_1437400,	100	4.53	inf	0.00236777	0.0272094	1
GO:0004298	threonine-type endopeptidase activity	15	14	PF3D7_0108000,PF3D7_0317000,PF3D7_0518300,PF3D7_0608500,PF3D7_0727400,PF3D7_0803800,PF3D7_0807500,PF3D7_0931800,PF3D7_1011400,PF3D7_1328100,PF3D7_1353800,PF3D7_1353900,PF3D7_1470900,PF3D7_1474800,	93.3	4.23	50.04	7.32853e-09	4.9937e-07	6.14864e-06
GO:0070003	threonine-type peptidase activity	15	14	PF3D7_0108000,PF3D7_0317000,PF3D7_0518300,PF3D7_0608500,PF3D7_0727400,PF3D7_0803800,PF3D7_0807500,PF3D7_0931800,PF3D7_1011400,PF3D7_1328100,PF3D7_1353800,PF3D7_1353900,PF3D7_1470900,PF3D7_1474800,	93.3	4.23	50.04	7.32853e-09	4.9937e-07	6.14864e-06
GO:0016763	pentosyltransferase activity	7	6	PF3D7_0512700,PF3D7_0513300,PF3D7_0629100,PF3D7_0717400,PF3D7_1012400,PF3D7_1434100,	85.7	3.88	21.28	0.000651665	0.00911245	0.546747
GO:0005085	guanyl-nucleotide exchange factor activity	7	6	PF3D7_0319600,PF3D7_0418600,PF3D7_0815800,PF3D7_0913200,PF3D7_1213900,PF3D7_1352800,	85.7	3.88	21.28	0.000651665	0.00911245	0.546747
GO:0000217	DNA secondary structure binding	5	4	PF3D7_0414000,PF3D7_0505500,PF3D7_1130700,PF3D7_1427500,	80	3.62	14.16	0.00975344	0.0818314	1
GO:0070628	proteasome binding	5	4	PF3D7_0527200,PF3D7_1011700,PF3D7_1368100,PF3D7_1414000,	80	3.62	14.16	0.00975344	0.0818314	1
GO:0030619	U1 snRNA binding	5	4	PF3D7_0405400,PF3D7_0812700,PF3D7_0935000,PF3D7_1367100,	80	3.62	14.16	0.00975344	0.0818314	1
GO:0016884	carbon-nitrogen ligase activity, with glutamine as amido-N-donor	7	5	PF3D7_0309500,PF3D7_0926700,PF3D7_1012600,PF3D7_1308200,PF3D7_1324000,	71.4	3.23	8.86	0.00731187	0.0674138	1
GO:0000146	microfilament motor activity	7	5	PF3D7_0613900,PF3D7_1229800,PF3D7_1329100,PF3D7_1342600,PF3D7_1412500,	71.4	3.23	8.86	0.00731187	0.0674138	1
GO:0003712	transcription coregulator activity	20	14	PF3D7_0501800,PF3D7_0628600,PF3D7_0704400,PF3D7_0709300,PF3D7_0820000,PF3D7_0822100,PF3D7_0823300,PF3D7_1107500,PF3D7_1128200,PF3D7_1141800,PF3D7_1248900,PF3D7_1469700,PF3D7_1473700,PF3D7_1475000,	70	3.17	8.33	6.07455e-06	0.000130681	0.00509654
GO:0017069	snRNA binding	13	9	PF3D7_0405400,PF3D7_0515000,PF3D7_0812700,PF3D7_0935000,PF3D7_1003800,PF3D7_1123900,PF3D7_1248200,PF3D7_1343900,PF3D7_1367100,	69.2	3.14	8.0	0.000362131	0.00523841	0.303828
GO:0031369	translation initiation factor binding	9	6	PF3D7_0517700,PF3D7_0918300,PF3D7_1010600,PF3D7_1206200,PF3D7_1213900,PF3D7_1457300,	66.7	3.02	7.09	0.00516723	0.0510036	1
GO:0140104	molecular carrier activity	11	7	PF3D7_0302900,PF3D7_0524000,PF3D7_0627700,PF3D7_0812400,PF3D7_0815200,PF3D7_0910100,PF3D7_0932800,	63.6	2.88	6.21	0.0035621	0.0381536	1
GO:0004722	protein serine/threonine phosphatase activity	20	12	PF3D7_0410300,PF3D7_0717500,PF3D7_0810300,PF3D7_0810500,PF3D7_1012700,PF3D7_1018200,PF3D7_1135100,PF3D7_1138500,PF3D7_1355500,PF3D7_1355700,PF3D7_1414400,PF3D7_1423300,	60	2.72	5.34	0.00026804	0.00424312	0.224885
GO:0042393	histone binding	32	19	PF3D7_0110700,PF3D7_0314700,PF3D7_0501800,PF3D7_0517300,PF3D7_0707200,PF3D7_0818200,PF3D7_0820000,PF3D7_0919000,PF3D7_1008100,PF3D7_1033700,PF3D7_1124300,PF3D7_1203700,PF3D7_1205600,PF3D7_1224500,PF3D7_1329300,PF3D7_1406200,PF3D7_1427900,PF3D7_1433300,PF3D7_1441400,	59.4	2.69	5.23	5.24365e-06	0.000118903	0.00439942
GO:0044769	ATPase activity, coupled to transmembrane movement of ions, rotational mechanism	12	7	PF3D7_0106100,PF3D7_0406100,PF3D7_0934500,PF3D7_1306600,PF3D7_1311900,PF3D7_1341900,PF3D7_1464700,	58.3	2.64	4.97	0.00693075	0.0653359	1
GO:0042625	ATPase-coupled ion transmembrane transporter activity	12	7	PF3D7_0106100,PF3D7_0406100,PF3D7_0934500,PF3D7_1306600,PF3D7_1311900,PF3D7_1341900,PF3D7_1464700,	58.3	2.64	4.97	0.00693075	0.0653359	1
GO:0046961	proton-transporting ATPase activity, rotational mechanism	12	7	PF3D7_0106100,PF3D7_0406100,PF3D7_0934500,PF3D7_1306600,PF3D7_1311900,PF3D7_1341900,PF3D7_1464700,	58.3	2.64	4.97	0.00693075	0.0653359	1
GO:0030695	GTPase regulator activity	26	15	PF3D7_0319600,PF3D7_0418600,PF3D7_0526200,PF3D7_0804900,PF3D7_0815800,PF3D7_0822600,PF3D7_0913200,PF3D7_1007200,PF3D7_1016200,PF3D7_1038100,PF3D7_1213900,PF3D7_1242800,PF3D7_1244600,PF3D7_1352800,PF3D7_1473100,	57.7	2.61	4.87	8.44494e-05	0.00150751	0.0708531
GO:0060589	nucleoside-triphosphatase regulator activity	26	15	PF3D7_0319600,PF3D7_0418600,PF3D7_0526200,PF3D7_0804900,PF3D7_0815800,PF3D7_0822600,PF3D7_0913200,PF3D7_1007200,PF3D7_1016200,PF3D7_1038100,PF3D7_1213900,PF3D7_1242800,PF3D7_1244600,PF3D7_1352800,PF3D7_1473100,	57.7	2.61	4.87	8.44494e-05	0.00150751	0.0708531
GO:0003688	DNA replication origin binding	14	8	PF3D7_0411900,PF3D7_0527000,PF3D7_0705300,PF3D7_0705400,PF3D7_1211700,PF3D7_1317100,PF3D7_1355100,PF3D7_1417800,	57.1	2.59	4.73	0.00457307	0.0462265	1
GO:0003899	DNA-directed 5'-3' RNA polymerase activity	39	22	PF3D7_0110400,PF3D7_0215700,PF3D7_0303300,PF3D7_0318200,PF3D7_0509400,PF3D7_0708100,PF3D7_0912800,PF3D7_0923000,PF3D7_1104700,PF3D7_1119700,PF3D7_1134700,PF3D7_1143300,PF3D7_1206600,PF3D7_1213700,PF3D7_1304900,PF3D7_1329000,PF3D7_1364800,PF3D7_1404000,PF3D7_1415200,PF3D7_1421400,PF3D7_1438700,PF3D7_1458800,	56.4	2.55	4.64	3.0835e-06	8.08455e-05	0.00258706
GO:0097747	RNA polymerase activity	39	22	PF3D7_0110400,PF3D7_0215700,PF3D7_0303300,PF3D7_0318200,PF3D7_0509400,PF3D7_0708100,PF3D7_0912800,PF3D7_0923000,PF3D7_1104700,PF3D7_1119700,PF3D7_1134700,PF3D7_1143300,PF3D7_1206600,PF3D7_1213700,PF3D7_1304900,PF3D7_1329000,PF3D7_1364800,PF3D7_1404000,PF3D7_1415200,PF3D7_1421400,PF3D7_1438700,PF3D7_1458800,	56.4	2.55	4.64	3.0835e-06	8.08455e-05	0.00258706
GO:0034062	5'-3' RNA polymerase activity	39	22	PF3D7_0110400,PF3D7_0215700,PF3D7_0303300,PF3D7_0318200,PF3D7_0509400,PF3D7_0708100,PF3D7_0912800,PF3D7_0923000,PF3D7_1104700,PF3D7_1119700,PF3D7_1134700,PF3D7_1143300,PF3D7_1206600,PF3D7_1213700,PF3D7_1304900,PF3D7_1329000,PF3D7_1364800,PF3D7_1404000,PF3D7_1415200,PF3D7_1421400,PF3D7_1438700,PF3D7_1458800,	56.4	2.55	4.64	3.0835e-06	8.08455e-05	0.00258706
GO:0003697	single-stranded DNA binding	27	15	PF3D7_0409600,PF3D7_0411900,PF3D7_0527000,PF3D7_0605800,PF3D7_0705400,PF3D7_0904800,PF3D7_1107400,PF3D7_1202100,PF3D7_1211700,PF3D7_1317100,PF3D7_1355100,PF3D7_1357500,PF3D7_1417800,PF3D7_1441400,PF3D7_1442100,	55.6	2.52	4.46	0.000151519	0.00259437	0.127124
GO:0042802	identical protein binding	18	10	PF3D7_0102900,PF3D7_0608800,PF3D7_0621200,PF3D7_0922200,PF3D7_1127100,PF3D7_1216200,PF3D7_1235600,PF3D7_1316600,PF3D7_1410200,PF3D7_1446200,	55.6	2.52	4.44	0.00200154	0.0239898	1
GO:0003729	mRNA binding	119	64	PF3D7_0105200,PF3D7_0108300,PF3D7_0109200,PF3D7_0212300,PF3D7_0310300,PF3D7_0320800,PF3D7_0422500,PF3D7_0422700,PF3D7_0511500,PF3D7_0515000,PF3D7_0526500,PF3D7_0604500,PF3D7_0605100,PF3D7_0610900,PF3D7_0629400,PF3D7_0703500,PF3D7_0706500,PF3D7_0721600,PF3D7_0810600,PF3D7_0812700,PF3D7_0813400,PF3D7_0814200,PF3D7_0815600,PF3D7_0823200,PF3D7_0907400,PF3D7_0909800,PF3D7_0916700,PF3D7_0929200,PF3D7_0…	53.8	2.44	4.3	2.18698e-14	4.5872e-12	1.83488e-11
GO:0042054	histone methyltransferase activity	15	8	PF3D7_0629700,PF3D7_0811500,PF3D7_0827800,PF3D7_1115200,PF3D7_1142700,PF3D7_1355300,PF3D7_1361000,PF3D7_1407100,	53.3	2.42	4.06	0.00792325	0.0714797	1
GO:0008242	omega peptidase activity	22	11	PF3D7_0413900,PF3D7_0516700,PF3D7_0527200,PF3D7_0630600,PF3D7_0726500,PF3D7_0904600,PF3D7_1031400,PF3D7_1117100,PF3D7_1317000,PF3D7_1368100,PF3D7_1408700,	50	2.26	3.55	0.00359253	0.0381536	1
GO:0016810	hydrolase activity, acting on carbon-nitrogen (but not peptide) bonds	22	11	PF3D7_0320500,PF3D7_0415300,PF3D7_0621200,PF3D7_0729100,PF3D7_0906500,PF3D7_0925700,PF3D7_0926700,PF3D7_1008000,PF3D7_1029600,PF3D7_1224000,PF3D7_1329400,	50	2.26	3.55	0.00359253	0.0381536	1
GO:0004843	thiol-dependent deubiquitinase	22	11	PF3D7_0413900,PF3D7_0516700,PF3D7_0527200,PF3D7_0630600,PF3D7_0726500,PF3D7_0904600,PF3D7_1031400,PF3D7_1117100,PF3D7_1317000,PF3D7_1368100,PF3D7_1408700,	50	2.26	3.55	0.00359253	0.0381536	1
GO:0005543	phospholipid binding	18	9	PF3D7_0208100,PF3D7_0704400,PF3D7_0818900,PF3D7_1012900,PF3D7_1013500,PF3D7_1123100,PF3D7_1243900,PF3D7_1316600,PF3D7_1352800,	50	2.26	3.55	0.00835463	0.0722632	1
GO:0005096	GTPase activator activity	18	9	PF3D7_0526200,PF3D7_0804900,PF3D7_0822600,PF3D7_1007200,PF3D7_1016200,PF3D7_1038100,PF3D7_1242800,PF3D7_1244600,PF3D7_1473100,	50	2.26	3.55	0.00835463	0.0722632	1
GO:0030234	enzyme regulator activity	71	35	PF3D7_0105800,PF3D7_0205900,PF3D7_0319600,PF3D7_0418100,PF3D7_0418600,PF3D7_0526200,PF3D7_0804900,PF3D7_0815800,PF3D7_0822600,PF3D7_0907700,PF3D7_0913200,PF3D7_1007200,PF3D7_1016200,PF3D7_1020900,PF3D7_1031700,PF3D7_1032100,PF3D7_1032800,PF3D7_1038100,PF3D7_1103100,PF3D7_1103700,PF3D7_1129200,PF3D7_1213900,PF3D7_1223100,PF3D7_1226600,PF3D7_1242800,PF3D7_1244600,PF3D7_1305300,PF3D7_1338100,PF3D7_1…	49.3	2.23	3.51	3.39279e-07	1.23763e-05	0.000284655
GO:0004721	phosphoprotein phosphatase activity	39	19	PF3D7_0107800,PF3D7_0309000,PF3D7_0410300,PF3D7_0717500,PF3D7_0810300,PF3D7_0810500,PF3D7_1012700,PF3D7_1018200,PF3D7_1135100,PF3D7_1138500,PF3D7_1208900,PF3D7_1355500,PF3D7_1355700,PF3D7_1403900,PF3D7_1406700,PF3D7_1414400,PF3D7_1423300,PF3D7_1464600,PF3D7_1469200,	48.7	2.21	3.39	0.000208972	0.00350656	0.175328
GO:0003682	chromatin binding	37	18	PF3D7_0403700,PF3D7_0411900,PF3D7_0414000,PF3D7_0517400,PF3D7_0711500,PF3D7_0719300,PF3D7_0818700,PF3D7_0919000,PF3D7_1033700,PF3D7_1103600,PF3D7_1203700,PF3D7_1224500,PF3D7_1329300,PF3D7_1406200,PF3D7_1412100,PF3D7_1422800,PF3D7_1441400,PF3D7_1466800,	48.6	2.2	3.38	0.000313322	0.00473512	0.262877
GO:0008047	enzyme activator activity	33	16	PF3D7_0526200,PF3D7_0804900,PF3D7_0822600,PF3D7_0907700,PF3D7_1007200,PF3D7_1016200,PF3D7_1020900,PF3D7_1032100,PF3D7_1038100,PF3D7_1103100,PF3D7_1226600,PF3D7_1242800,PF3D7_1244600,PF3D7_1361900,PF3D7_1414000,PF3D7_1473100,	48.5	2.2	3.36	0.000706391	0.00971577	0.592662
GO:0003743	translation initiation factor activity	63	30	PF3D7_0315100,PF3D7_0418200,PF3D7_0422700,PF3D7_0517700,PF3D7_0607000,PF3D7_0716800,PF3D7_0728000,PF3D7_0815600,PF3D7_0828500,PF3D7_0907600,PF3D7_0912800,PF3D7_0918300,PF3D7_0929000,PF3D7_1007900,PF3D7_1010600,PF3D7_1013900,PF3D7_1019000,PF3D7_1107300,PF3D7_1204300,PF3D7_1206200,PF3D7_1212700,PF3D7_1213900,PF3D7_1250600,PF3D7_1250700,PF3D7_1326400,PF3D7_1332800,PF3D7_1366900,PF3D7_1410600,PF3D7_1…	47.6	2.16	3.27	5.82717e-06	0.000128658	0.004889
GO:0000049	tRNA binding	30	14	PF3D7_0109800,PF3D7_0612600,PF3D7_0717700,PF3D7_1019000,PF3D7_1020700,PF3D7_1202600,PF3D7_1203500,PF3D7_1205100,PF3D7_1315900,PF3D7_1319300,PF3D7_1332900,PF3D7_1350100,PF3D7_1438000,PF3D7_1442300,	46.7	2.11	3.11	0.00239988	0.0272094	1
GO:0051082	unfolded protein binding	65	30	PF3D7_0110700,PF3D7_0213100,PF3D7_0214000,PF3D7_0306800,PF3D7_0308200,PF3D7_0320300,PF3D7_0512000,PF3D7_0608700,PF3D7_0621800,PF3D7_0708400,PF3D7_0718500,PF3D7_0818900,PF3D7_0904500,PF3D7_0907300,PF3D7_0917900,PF3D7_1107500,PF3D7_1118200,PF3D7_1128100,PF3D7_1132200,PF3D7_1211400,PF3D7_1215300,PF3D7_1224500,PF3D7_1229500,PF3D7_1304500,PF3D7_1329300,PF3D7_1336800,PF3D7_1357800,PF3D7_1416900,PF3D7_1…	46.2	2.09	3.08	1.27833e-05	0.000249424	0.0107252
GO:0003746	translation elongation factor activity	26	12	PF3D7_0319600,PF3D7_0610900,PF3D7_0714500,PF3D7_0913200,PF3D7_0931000,PF3D7_1123400,PF3D7_1204300,PF3D7_1330600,PF3D7_1338300,PF3D7_1357000,PF3D7_1406200,PF3D7_1451100,	46.2	2.09	3.05	0.0054391	0.0530629	1
GO:0101005	deubiquitinase activity	24	11	PF3D7_0413900,PF3D7_0516700,PF3D7_0527200,PF3D7_0630600,PF3D7_0726500,PF3D7_0904600,PF3D7_1031400,PF3D7_1117100,PF3D7_1317000,PF3D7_1368100,PF3D7_1408700,	45.8	2.08	3.01	0.00820935	0.0722632	1
GO:0098772	molecular function regulator	83	38	PF3D7_0105800,PF3D7_0205900,PF3D7_0306200,PF3D7_0319600,PF3D7_0418100,PF3D7_0418600,PF3D7_0526200,PF3D7_0804900,PF3D7_0815800,PF3D7_0822600,PF3D7_0907700,PF3D7_0913200,PF3D7_1007200,PF3D7_1016200,PF3D7_1020900,PF3D7_1031700,PF3D7_1032100,PF3D7_1032800,PF3D7_1038100,PF3D7_1103100,PF3D7_1103700,PF3D7_1129200,PF3D7_1213900,PF3D7_1223100,PF3D7_1226600,PF3D7_1242800,PF3D7_1244600,PF3D7_1305300,PF3D7_1…	45.8	2.07	3.05	1.15968e-06	3.6036e-05	0.000972973
GO:0004812	aminoacyl-tRNA ligase activity	40	18	PF3D7_0102900,PF3D7_0109800,PF3D7_0211800,PF3D7_0622800,PF3D7_0717700,PF3D7_0807900,PF3D7_1034900,PF3D7_1104000,PF3D7_1213800,PF3D7_1218600,PF3D7_1331700,PF3D7_1332900,PF3D7_1336900,PF3D7_1349200,PF3D7_1350100,PF3D7_1442300,PF3D7_1445100,PF3D7_1461900,	45	2.04	2.92	0.00101596	0.0135071	0.852393
GO:0016875	ligase activity, forming carbon-oxygen bonds	40	18	PF3D7_0102900,PF3D7_0109800,PF3D7_0211800,PF3D7_0622800,PF3D7_0717700,PF3D7_0807900,PF3D7_1034900,PF3D7_1104000,PF3D7_1213800,PF3D7_1218600,PF3D7_1331700,PF3D7_1332900,PF3D7_1336900,PF3D7_1349200,PF3D7_1350100,PF3D7_1442300,PF3D7_1445100,PF3D7_1461900,	45	2.04	2.92	0.00101596	0.0135071	0.852393
GO:0090079	translation regulator activity, nucleic acid binding	96	43	PF3D7_0212300,PF3D7_0315100,PF3D7_0319600,PF3D7_0418200,PF3D7_0422700,PF3D7_0517700,PF3D7_0607000,PF3D7_0610900,PF3D7_0714500,PF3D7_0716800,PF3D7_0728000,PF3D7_0814200,PF3D7_0815600,PF3D7_0828500,PF3D7_0907600,PF3D7_0912800,PF3D7_0913200,PF3D7_0918300,PF3D7_0929000,PF3D7_0931000,PF3D7_1007900,PF3D7_1010600,PF3D7_1013900,PF3D7_1019000,PF3D7_1107300,PF3D7_1123400,PF3D7_1204300,PF3D7_1206200,PF3D7_1…	44.8	2.03	2.94	4.87342e-07	1.63552e-05	0.00040888
GO:0008135	translation factor activity, RNA binding	94	42	PF3D7_0212300,PF3D7_0315100,PF3D7_0319600,PF3D7_0418200,PF3D7_0422700,PF3D7_0517700,PF3D7_0607000,PF3D7_0610900,PF3D7_0714500,PF3D7_0716800,PF3D7_0728000,PF3D7_0815600,PF3D7_0828500,PF3D7_0907600,PF3D7_0912800,PF3D7_0913200,PF3D7_0918300,PF3D7_0929000,PF3D7_0931000,PF3D7_1007900,PF3D7_1010600,PF3D7_1013900,PF3D7_1019000,PF3D7_1107300,PF3D7_1123400,PF3D7_1204300,PF3D7_1206200,PF3D7_1212700,PF3D7_1…	44.7	2.02	2.93	7.19519e-07	2.32183e-05	0.000603676
GO:0003723	RNA binding	628	278	PF3D7_0102900,PF3D7_0105200,PF3D7_0106700,PF3D7_0108300,PF3D7_0109200,PF3D7_0109800,PF3D7_0205400,PF3D7_0209800,PF3D7_0212300,PF3D7_0218000,PF3D7_0218500,PF3D7_0302500,PF3D7_0304200,PF3D7_0307200,PF3D7_0309600,PF3D7_0310300,PF3D7_0310500,PF3D7_0315100,PF3D7_0316800,PF3D7_0319600,PF3D7_0320800,PF3D7_0321600,PF3D7_0322900,PF3D7_0403700,PF3D7_0405400,PF3D7_0410400,PF3D7_0415900,PF3D7_0417200,PF3D7_0…	44.3	2	3.43	4.7712e-41	4.00304e-38	4.00304e-38
GO:0003924	GTPase activity	84	37	PF3D7_0106700,PF3D7_0106800,PF3D7_0211200,PF3D7_0416800,PF3D7_0419600,PF3D7_0422300,PF3D7_0512600,PF3D7_0513800,PF3D7_0607000,PF3D7_0803700,PF3D7_0807300,PF3D7_0903200,PF3D7_0903700,PF3D7_0931000,PF3D7_1003800,PF3D7_1008700,PF3D7_1020900,PF3D7_1037500,PF3D7_1117700,PF3D7_1123400,PF3D7_1144900,PF3D7_1145400,PF3D7_1201500,PF3D7_1218500,PF3D7_1231100,PF3D7_1320600,PF3D7_1330600,PF3D7_1340700,PF3D7_1…	44	1.99	2.84	5.0036e-06	0.000116612	0.00419802
GO:0008094	ATP-dependent activity, acting on DNA	55	24	PF3D7_0219600,PF3D7_0505500,PF3D7_0624600,PF3D7_0705400,PF3D7_0818700,PF3D7_0934100,PF3D7_1010200,PF3D7_1023900,PF3D7_1104200,PF3D7_1106000,PF3D7_1106700,PF3D7_1107400,PF3D7_1211700,PF3D7_1241700,PF3D7_1317100,PF3D7_1355100,PF3D7_1357500,PF3D7_1362200,PF3D7_1408400,PF3D7_1417800,PF3D7_1427500,PF3D7_1433500,PF3D7_1459000,PF3D7_1468700,	43.6	1.98	2.77	0.000274374	0.00426297	0.2302
GO:0016879	ligase activity, forming carbon-nitrogen bonds	30	13	PF3D7_0309500,PF3D7_0412300,PF3D7_0629100,PF3D7_0918900,PF3D7_0922600,PF3D7_0926700,PF3D7_1012600,PF3D7_1102400,PF3D7_1308200,PF3D7_1324000,PF3D7_1324800,PF3D7_1410200,PF3D7_1429500,	43.3	1.96	2.72	0.00741718	0.0676415	1
GO:0004540	ribonuclease activity	35	15	PF3D7_0305600,PF3D7_0410400,PF3D7_0418700,PF3D7_0519500,PF3D7_0621500,PF3D7_0627900,PF3D7_0709600,PF3D7_0720000,PF3D7_0811300,PF3D7_0909400,PF3D7_1248000,PF3D7_1359300,PF3D7_1364500,PF3D7_1438500,PF3D7_1465300,	42.9	1.94	2.67	0.00468339	0.0467781	1
GO:0046983	protein dimerization activity	40	17	PF3D7_0102900,PF3D7_0105300,PF3D7_0512700,PF3D7_0524000,PF3D7_0812400,PF3D7_0922200,PF3D7_0923000,PF3D7_1105000,PF3D7_1105100,PF3D7_1143300,PF3D7_1216200,PF3D7_1235600,PF3D7_1247400,PF3D7_1302100,PF3D7_1304900,PF3D7_1415200,PF3D7_1438900,	42.5	1.92	2.63	0.0029664	0.0331842	1
GO:0140110	transcription regulator activity	62	26	PF3D7_0317300,PF3D7_0420300,PF3D7_0501800,PF3D7_0506800,PF3D7_0613800,PF3D7_0628600,PF3D7_0704400,PF3D7_0709300,PF3D7_0730300,PF3D7_0820000,PF3D7_0822100,PF3D7_0823300,PF3D7_1007700,PF3D7_1011800,PF3D7_1107500,PF3D7_1107800,PF3D7_1119700,PF3D7_1128200,PF3D7_1141800,PF3D7_1222600,PF3D7_1248900,PF3D7_1449500,PF3D7_1466400,PF3D7_1469700,PF3D7_1473700,PF3D7_1475000,	41.9	1.9	2.59	0.000334552	0.00492436	0.280689
GO:0005525	GTP binding	106	44	PF3D7_0106700,PF3D7_0106800,PF3D7_0211200,PF3D7_0304200,PF3D7_0416800,PF3D7_0419600,PF3D7_0422300,PF3D7_0512600,PF3D7_0513800,PF3D7_0524400,PF3D7_0607000,PF3D7_0722400,PF3D7_0803700,PF3D7_0807300,PF3D7_0903200,PF3D7_0903700,PF3D7_0931000,PF3D7_1003800,PF3D7_1008700,PF3D7_1020900,PF3D7_1037500,PF3D7_1105700,PF3D7_1117700,PF3D7_1123400,PF3D7_1144900,PF3D7_1145400,PF3D7_1218500,PF3D7_1224000,PF3D7_1…	41.5	1.88	2.57	4.50601e-06	0.000111193	0.00378055
GO:0003678	DNA helicase activity	41	17	PF3D7_0624600,PF3D7_0705400,PF3D7_0818700,PF3D7_0934100,PF3D7_1010200,PF3D7_1023900,PF3D7_1106000,PF3D7_1106700,PF3D7_1211700,PF3D7_1317100,PF3D7_1355100,PF3D7_1357500,PF3D7_1362200,PF3D7_1408400,PF3D7_1417800,PF3D7_1459000,PF3D7_1468700,	41.5	1.88	2.52	0.00404521	0.0419004	1
GO:0008186	ATP-dependent activity, acting on RNA	56	23	PF3D7_0209800,PF3D7_0310500,PF3D7_0320800,PF3D7_0321600,PF3D7_0422500,PF3D7_0422700,PF3D7_0518500,PF3D7_0521700,PF3D7_0602100,PF3D7_0810600,PF3D7_0903400,PF3D7_0909900,PF3D7_0917600,PF3D7_1005500,PF3D7_1010200,PF3D7_1231600,PF3D7_1331100,PF3D7_1352700,PF3D7_1408400,PF3D7_1439100,PF3D7_1445900,PF3D7_1459000,PF3D7_1468700,	41.1	1.86	2.49	0.00103034	0.0135071	0.864456
GO:0004386	helicase activity	98	40	PF3D7_0209800,PF3D7_0310500,PF3D7_0320800,PF3D7_0321600,PF3D7_0422500,PF3D7_0422700,PF3D7_0518500,PF3D7_0521700,PF3D7_0602100,PF3D7_0624600,PF3D7_0703500,PF3D7_0705400,PF3D7_0810600,PF3D7_0818700,PF3D7_0820000,PF3D7_0903400,PF3D7_0909900,PF3D7_0917600,PF3D7_0934100,PF3D7_1005500,PF3D7_1010200,PF3D7_1023900,PF3D7_1104200,PF3D7_1106000,PF3D7_1106700,PF3D7_1211700,PF3D7_1231600,PF3D7_1302500,PF3D7_1…	40.8	1.85	2.49	1.97435e-05	0.000376473	0.0165648
GO:0032561	guanyl ribonucleotide binding	108	44	PF3D7_0106700,PF3D7_0106800,PF3D7_0211200,PF3D7_0304200,PF3D7_0416800,PF3D7_0419600,PF3D7_0422300,PF3D7_0512600,PF3D7_0513800,PF3D7_0524400,PF3D7_0607000,PF3D7_0722400,PF3D7_0803700,PF3D7_0807300,PF3D7_0903200,PF3D7_0903700,PF3D7_0931000,PF3D7_1003800,PF3D7_1008700,PF3D7_1020900,PF3D7_1037500,PF3D7_1105700,PF3D7_1117700,PF3D7_1123400,PF3D7_1144900,PF3D7_1145400,PF3D7_1218500,PF3D7_1224000,PF3D7_1…	40.7	1.84	2.49	8.08068e-06	0.000165358	0.00677969
GO:0019001	guanyl nucleotide binding	108	44	PF3D7_0106700,PF3D7_0106800,PF3D7_0211200,PF3D7_0304200,PF3D7_0416800,PF3D7_0419600,PF3D7_0422300,PF3D7_0512600,PF3D7_0513800,PF3D7_0524400,PF3D7_0607000,PF3D7_0722400,PF3D7_0803700,PF3D7_0807300,PF3D7_0903200,PF3D7_0903700,PF3D7_0931000,PF3D7_1003800,PF3D7_1008700,PF3D7_1020900,PF3D7_1037500,PF3D7_1105700,PF3D7_1117700,PF3D7_1123400,PF3D7_1144900,PF3D7_1145400,PF3D7_1218500,PF3D7_1224000,PF3D7_1…	40.7	1.84	2.49	8.08068e-06	0.000165358	0.00677969
GO:0016779	nucleotidyltransferase activity	74	30	PF3D7_0110400,PF3D7_0215700,PF3D7_0303300,PF3D7_0318200,PF3D7_0509400,PF3D7_0513200,PF3D7_0612600,PF3D7_0708100,PF3D7_0912800,PF3D7_0923000,PF3D7_1104700,PF3D7_1119700,PF3D7_1120500,PF3D7_1134700,PF3D7_1143300,PF3D7_1203500,PF3D7_1206600,PF3D7_1213700,PF3D7_1304900,PF3D7_1316600,PF3D7_1327600,PF3D7_1329000,PF3D7_1347700,PF3D7_1364800,PF3D7_1404000,PF3D7_1415200,PF3D7_1420900,PF3D7_1421400,PF3D7_1…	40.5	1.84	2.45	0.000245905	0.00396758	0.206314
GO:0003724	RNA helicase activity	55	22	PF3D7_0209800,PF3D7_0310500,PF3D7_0320800,PF3D7_0321600,PF3D7_0422500,PF3D7_0422700,PF3D7_0518500,PF3D7_0521700,PF3D7_0602100,PF3D7_0810600,PF3D7_0903400,PF3D7_0909900,PF3D7_0917600,PF3D7_1005500,PF3D7_1010200,PF3D7_1231600,PF3D7_1331100,PF3D7_1352700,PF3D7_1408400,PF3D7_1439100,PF3D7_1445900,PF3D7_1459000,	40	1.81	2.38	0.00198213	0.0239898	1
GO:0016791	phosphatase activity	63	25	PF3D7_0107800,PF3D7_0303200,PF3D7_0305600,PF3D7_0309000,PF3D7_0410300,PF3D7_0705500,PF3D7_0717500,PF3D7_0810300,PF3D7_0810500,PF3D7_1012700,PF3D7_1018200,PF3D7_1033400,PF3D7_1135100,PF3D7_1138500,PF3D7_1208900,PF3D7_1355500,PF3D7_1355700,PF3D7_1363200,PF3D7_1403900,PF3D7_1406700,PF3D7_1414400,PF3D7_1423300,PF3D7_1430300,PF3D7_1464600,PF3D7_1469200,	39.7	1.8	2.35	0.00114985	0.0148418	0.96472
GO:0003690	double-stranded DNA binding	48	19	PF3D7_0205400,PF3D7_0411900,PF3D7_0505500,PF3D7_0527000,PF3D7_0605800,PF3D7_0624600,PF3D7_0705300,PF3D7_0705400,PF3D7_1011800,PF3D7_1107400,PF3D7_1130700,PF3D7_1211700,PF3D7_1317100,PF3D7_1355100,PF3D7_1363200,PF3D7_1417800,PF3D7_1427500,PF3D7_1438900,PF3D7_1473700,	39.6	1.79	2.34	0.00451612	0.0462076	1
GO:0005198	structural molecule activity	209	82	PF3D7_0214100,PF3D7_0306900,PF3D7_0307100,PF3D7_0307200,PF3D7_0309000,PF3D7_0309600,PF3D7_0316800,PF3D7_0317600,PF3D7_0322900,PF3D7_0415900,PF3D7_0422300,PF3D7_0422400,PF3D7_0503800,PF3D7_0507100,PF3D7_0516200,PF3D7_0516900,PF3D7_0517000,PF3D7_0519400,PF3D7_0520000,PF3D7_0606700,PF3D7_0610900,PF3D7_0705700,PF3D7_0719600,PF3D7_0719700,PF3D7_0721600,PF3D7_0803700,PF3D7_0808400,PF3D7_0813900,PF3D7_0…	39.2	1.78	2.38	7.73755e-09	4.9937e-07	6.49181e-06
GO:0005515	protein binding	605	237	PF3D7_0102200,PF3D7_0107800,PF3D7_0109000,PF3D7_0110500,PF3D7_0110700,PF3D7_0204100,PF3D7_0207500,PF3D7_0209000,PF3D7_0211200,PF3D7_0213500,PF3D7_0214000,PF3D7_0214100,PF3D7_0215400,PF3D7_0217500,PF3D7_0302000,PF3D7_0302500,PF3D7_0304200,PF3D7_0308600,PF3D7_0309000,PF3D7_0315100,PF3D7_0317300,PF3D7_0317700,PF3D7_0317800,PF3D7_0318200,PF3D7_0320800,PF3D7_0321800,PF3D7_0403700,PF3D7_0406100,PF3D7_0…	39.2	1.77	2.63	1.25127e-24	3.4994e-22	1.04982e-21
GO:0044877	protein-containing complex binding	101	39	PF3D7_0316500,PF3D7_0503400,PF3D7_0517400,PF3D7_0527200,PF3D7_0613900,PF3D7_0621900,PF3D7_0719300,PF3D7_0722400,PF3D7_0728000,PF3D7_0729300,PF3D7_0806000,PF3D7_0826700,PF3D7_0903200,PF3D7_0905400,PF3D7_0931000,PF3D7_1011700,PF3D7_1019000,PF3D7_1035500,PF3D7_1035700,PF3D7_1103100,PF3D7_1202600,PF3D7_1204300,PF3D7_1229800,PF3D7_1251200,PF3D7_1305300,PF3D7_1329100,PF3D7_1332800,PF3D7_1342600,PF3D7_1…	38.6	1.75	2.27	0.000108304	0.00189306	0.0908669
GO:0003676	nucleic acid binding	224	86	PF3D7_0102900,PF3D7_0110400,PF3D7_0209800,PF3D7_0211800,PF3D7_0216200,PF3D7_0310500,PF3D7_0317700,PF3D7_0320800,PF3D7_0321600,PF3D7_0409600,PF3D7_0410400,PF3D7_0411900,PF3D7_0422500,PF3D7_0422700,PF3D7_0503300,PF3D7_0513200,PF3D7_0515000,PF3D7_0517300,PF3D7_0517700,PF3D7_0518500,PF3D7_0521700,PF3D7_0531400,PF3D7_0602100,PF3D7_0605100,PF3D7_0610200,PF3D7_0629400,PF3D7_0630300,PF3D7_0714500,PF3D7_0…	38.4	1.74	2.3	1.11401e-08	6.23101e-07	9.34651e-06
GO:0042578	phosphoric ester hydrolase activity	74	28	PF3D7_0107800,PF3D7_0303200,PF3D7_0305600,PF3D7_0309000,PF3D7_0410300,PF3D7_0705500,PF3D7_0717500,PF3D7_0810300,PF3D7_0810500,PF3D7_1012700,PF3D7_1013500,PF3D7_1018200,PF3D7_1033400,PF3D7_1135100,PF3D7_1138500,PF3D7_1208900,PF3D7_1238600,PF3D7_1239000,PF3D7_1355500,PF3D7_1355700,PF3D7_1363200,PF3D7_1403900,PF3D7_1406700,PF3D7_1414400,PF3D7_1423300,PF3D7_1430300,PF3D7_1464600,PF3D7_1469200,	37.8	1.71	2.18	0.00142628	0.0179371	1
GO:0016818	hydrolase activity, acting on acid anhydrides, in phosphorus-containing anhydrides	220	82	PF3D7_0106700,PF3D7_0106800,PF3D7_0211200,PF3D7_0219600,PF3D7_0303000,PF3D7_0316300,PF3D7_0407900,PF3D7_0413600,PF3D7_0415000,PF3D7_0416800,PF3D7_0419600,PF3D7_0422300,PF3D7_0512600,PF3D7_0513800,PF3D7_0520600,PF3D7_0527000,PF3D7_0607000,PF3D7_0619400,PF3D7_0626700,PF3D7_0707400,PF3D7_0708400,PF3D7_0708800,PF3D7_0722400,PF3D7_0803700,PF3D7_0806000,PF3D7_0807300,PF3D7_0818900,PF3D7_0820000,PF3D7_0…	37.3	1.69	2.19	1.16055e-07	5.12473e-06	9.737e-05
GO:0016462	pyrophosphatase activity	214	80	PF3D7_0106700,PF3D7_0106800,PF3D7_0211200,PF3D7_0219600,PF3D7_0303000,PF3D7_0316300,PF3D7_0407900,PF3D7_0413600,PF3D7_0415000,PF3D7_0416800,PF3D7_0419600,PF3D7_0422300,PF3D7_0512600,PF3D7_0513800,PF3D7_0520600,PF3D7_0527000,PF3D7_0607000,PF3D7_0619400,PF3D7_0626700,PF3D7_0707400,PF3D7_0708400,PF3D7_0708800,PF3D7_0722400,PF3D7_0803700,PF3D7_0806000,PF3D7_0807300,PF3D7_0818900,PF3D7_0820000,PF3D7_0…	37.4	1.69	2.2	1.44166e-07	5.74112e-06	0.000120955
GO:0017111	nucleoside-triphosphatase activity	198	74	PF3D7_0106700,PF3D7_0106800,PF3D7_0211200,PF3D7_0219600,PF3D7_0303000,PF3D7_0407900,PF3D7_0413600,PF3D7_0415000,PF3D7_0416800,PF3D7_0419600,PF3D7_0422300,PF3D7_0512600,PF3D7_0513800,PF3D7_0527000,PF3D7_0607000,PF3D7_0619400,PF3D7_0626700,PF3D7_0707400,PF3D7_0708400,PF3D7_0708800,PF3D7_0722400,PF3D7_0803700,PF3D7_0806000,PF3D7_0807300,PF3D7_0818900,PF3D7_0820000,PF3D7_0903200,PF3D7_0903700,PF3D7_0…	37.4	1.69	2.19	4.37388e-07	1.52903e-05	0.000366968
GO:0003735	structural constituent of ribosome	163	61	PF3D7_0306900,PF3D7_0307100,PF3D7_0307200,PF3D7_0309600,PF3D7_0316800,PF3D7_0317600,PF3D7_0322900,PF3D7_0415900,PF3D7_0422400,PF3D7_0503800,PF3D7_0507100,PF3D7_0516200,PF3D7_0516900,PF3D7_0517000,PF3D7_0519400,PF3D7_0520000,PF3D7_0610900,PF3D7_0705700,PF3D7_0719600,PF3D7_0719700,PF3D7_0721600,PF3D7_0813900,PF3D7_0814000,PF3D7_0821700,PF3D7_0903900,PF3D7_1003500,PF3D7_1004000,PF3D7_1019400,PF3D7_1…	37.4	1.69	2.18	4.40619e-06	0.000111193	0.00369679
GO:0140640	catalytic activity, acting on a nucleic acid	291	108	PF3D7_0102900,PF3D7_0109800,PF3D7_0110400,PF3D7_0209800,PF3D7_0211800,PF3D7_0215700,PF3D7_0303300,PF3D7_0305600,PF3D7_0310500,PF3D7_0318200,PF3D7_0320800,PF3D7_0321600,PF3D7_0410400,PF3D7_0418700,PF3D7_0422500,PF3D7_0422700,PF3D7_0509400,PF3D7_0518500,PF3D7_0519500,PF3D7_0521700,PF3D7_0524900,PF3D7_0602100,PF3D7_0621500,PF3D7_0622800,PF3D7_0624600,PF3D7_0627900,PF3D7_0703500,PF3D7_0705400,PF3D7_0…	37.1	1.68	2.2	1.28321e-09	1.07662e-07	1.07662e-06
GO:0016817	hydrolase activity, acting on acid anhydrides	221	82	PF3D7_0106700,PF3D7_0106800,PF3D7_0211200,PF3D7_0219600,PF3D7_0303000,PF3D7_0316300,PF3D7_0407900,PF3D7_0413600,PF3D7_0415000,PF3D7_0416800,PF3D7_0419600,PF3D7_0422300,PF3D7_0512600,PF3D7_0513800,PF3D7_0520600,PF3D7_0527000,PF3D7_0607000,PF3D7_0619400,PF3D7_0626700,PF3D7_0707400,PF3D7_0708400,PF3D7_0708800,PF3D7_0722400,PF3D7_0803700,PF3D7_0806000,PF3D7_0807300,PF3D7_0818900,PF3D7_0820000,PF3D7_0…	37.1	1.68	2.17	1.45958e-07	5.74112e-06	0.000122459
GO:0140098	catalytic activity, acting on RNA	250	91	PF3D7_0102900,PF3D7_0109800,PF3D7_0110400,PF3D7_0209800,PF3D7_0211800,PF3D7_0215700,PF3D7_0303300,PF3D7_0305600,PF3D7_0310500,PF3D7_0318200,PF3D7_0320800,PF3D7_0321600,PF3D7_0410400,PF3D7_0418700,PF3D7_0422500,PF3D7_0422700,PF3D7_0509400,PF3D7_0518500,PF3D7_0519500,PF3D7_0521700,PF3D7_0524900,PF3D7_0602100,PF3D7_0621500,PF3D7_0622800,PF3D7_0627900,PF3D7_0708100,PF3D7_0709600,PF3D7_0717400,PF3D7_0…	36.4	1.65	2.11	8.32392e-08	3.87987e-06	6.98377e-05
GO:0003674	molecular function	821	298	PF3D7_0105800,PF3D7_0106100,PF3D7_0205900,PF3D7_0206700,PF3D7_0209800,PF3D7_0212900,PF3D7_0214100,PF3D7_0219600,PF3D7_0302900,PF3D7_0303000,PF3D7_0306200,PF3D7_0306900,PF3D7_0307100,PF3D7_0307200,PF3D7_0309000,PF3D7_0309600,PF3D7_0310500,PF3D7_0316800,PF3D7_0317300,PF3D7_0317600,PF3D7_0319600,PF3D7_0320500,PF3D7_0320800,PF3D7_0321600,PF3D7_0322900,PF3D7_0405700,PF3D7_0406100,PF3D7_0407900,PF3D7_0…	36.3	1.64	2.4	6.33963e-25	2.65948e-22	5.31895e-22
GO:0140657	ATP-dependent activity	267	95	PF3D7_0106100,PF3D7_0209800,PF3D7_0219600,PF3D7_0303000,PF3D7_0310500,PF3D7_0320800,PF3D7_0321600,PF3D7_0406100,PF3D7_0407900,PF3D7_0413600,PF3D7_0415000,PF3D7_0422500,PF3D7_0422700,PF3D7_0505500,PF3D7_0518500,PF3D7_0521700,PF3D7_0525100,PF3D7_0527000,PF3D7_0602100,PF3D7_0613900,PF3D7_0619400,PF3D7_0619500,PF3D7_0624600,PF3D7_0626700,PF3D7_0703500,PF3D7_0705400,PF3D7_0707400,PF3D7_0708400,PF3D7_0…	35.6	1.61	2.04	1.50542e-07	5.74112e-06	0.000126305
GO:0003677	DNA binding	202	71	PF3D7_0215700,PF3D7_0218000,PF3D7_0219600,PF3D7_0303300,PF3D7_0308000,PF3D7_0318200,PF3D7_0411900,PF3D7_0414900,PF3D7_0420300,PF3D7_0509400,PF3D7_0527000,PF3D7_0613800,PF3D7_0624600,PF3D7_0628600,PF3D7_0630300,PF3D7_0705400,PF3D7_0708100,PF3D7_0730300,PF3D7_0814200,PF3D7_0818700,PF3D7_0820000,PF3D7_0912800,PF3D7_0923000,PF3D7_0934100,PF3D7_1005500,PF3D7_1006200,PF3D7_1006800,PF3D7_1007700,PF3D7_1…	35.1	1.59	1.98	9.87862e-06	0.000197337	0.00828816
GO:0016887	ATP hydrolysis activity	110	38	PF3D7_0219600,PF3D7_0303000,PF3D7_0407900,PF3D7_0413600,PF3D7_0415000,PF3D7_0527000,PF3D7_0619400,PF3D7_0626700,PF3D7_0707400,PF3D7_0708400,PF3D7_0708800,PF3D7_0722400,PF3D7_0806000,PF3D7_0818900,PF3D7_0820000,PF3D7_0907400,PF3D7_0917900,PF3D7_1008400,PF3D7_1015600,PF3D7_1106000,PF3D7_1118200,PF3D7_1121700,PF3D7_1130400,PF3D7_1130700,PF3D7_1201500,PF3D7_1241700,PF3D7_1248900,PF3D7_1306400,PF3D7_1…	34.5	1.56	1.89	0.00166675	0.0205647	1
GO:0008233	peptidase activity	159	54	PF3D7_0108000,PF3D7_0207500,PF3D7_0207700,PF3D7_0317000,PF3D7_0321500,PF3D7_0413600,PF3D7_0413900,PF3D7_0516700,PF3D7_0518300,PF3D7_0527200,PF3D7_0608500,PF3D7_0630600,PF3D7_0726500,PF3D7_0727400,PF3D7_0801700,PF3D7_0803800,PF3D7_0807500,PF3D7_0904600,PF3D7_0907400,PF3D7_0912900,PF3D7_0918300,PF3D7_0931800,PF3D7_0932300,PF3D7_1008400,PF3D7_1011400,PF3D7_1015300,PF3D7_1017900,PF3D7_1030500,PF3D7_1…	34	1.54	1.86	0.000316051	0.00473512	0.265167
GO:0016874	ligase activity	131	44	PF3D7_0102900,PF3D7_0109800,PF3D7_0211800,PF3D7_0305700,PF3D7_0309500,PF3D7_0412300,PF3D7_0525100,PF3D7_0619500,PF3D7_0622800,PF3D7_0627800,PF3D7_0629100,PF3D7_0717700,PF3D7_0731600,PF3D7_0807900,PF3D7_0918900,PF3D7_0922600,PF3D7_0926700,PF3D7_1012600,PF3D7_1034900,PF3D7_1102400,PF3D7_1104000,PF3D7_1105700,PF3D7_1126100,PF3D7_1144500,PF3D7_1213800,PF3D7_1218600,PF3D7_1225800,PF3D7_1237000,PF3D7_1…	33.6	1.52	1.82	0.0014324	0.0179371	1
GO:0140101	catalytic activity, acting on a tRNA	97	32	PF3D7_0102900,PF3D7_0109800,PF3D7_0211800,PF3D7_0524900,PF3D7_0621500,PF3D7_0622800,PF3D7_0627900,PF3D7_0709600,PF3D7_0717400,PF3D7_0717700,PF3D7_0807900,PF3D7_0908600,PF3D7_1034900,PF3D7_1104000,PF3D7_1111000,PF3D7_1120500,PF3D7_1213800,PF3D7_1218600,PF3D7_1248000,PF3D7_1315700,PF3D7_1319300,PF3D7_1331700,PF3D7_1332900,PF3D7_1336900,PF3D7_1349200,PF3D7_1350100,PF3D7_1429400,PF3D7_1434100,PF3D7_1…	33	1.49	1.76	0.00819413	0.0722632	1
GO:0003824	catalytic activity	133	43	PF3D7_0206700,PF3D7_0212900,PF3D7_0320500,PF3D7_0405700,PF3D7_0410300,PF3D7_0513300,PF3D7_0524900,PF3D7_0525100,PF3D7_0608800,PF3D7_0610800,PF3D7_0619500,PF3D7_0621200,PF3D7_0621500,PF3D7_0626800,PF3D7_0627800,PF3D7_0717500,PF3D7_0731600,PF3D7_0810300,PF3D7_0810500,PF3D7_0820200,PF3D7_0915400,PF3D7_0918900,PF3D7_0920800,PF3D7_0922600,PF3D7_1033100,PF3D7_1118300,PF3D7_1120100,PF3D7_1129000,PF3D7_1…	32.3	1.46	1.71	0.0036699	0.038488	1
GO:0032553	ribonucleotide binding	685	216	PF3D7_0102900,PF3D7_0106700,PF3D7_0106800,PF3D7_0109800,PF3D7_0110600,PF3D7_0209800,PF3D7_0211200,PF3D7_0211800,PF3D7_0214000,PF3D7_0217500,PF3D7_0218000,PF3D7_0219600,PF3D7_0302100,PF3D7_0303000,PF3D7_0303100,PF3D7_0304200,PF3D7_0306800,PF3D7_0308200,PF3D7_0309500,PF3D7_0310500,PF3D7_0312400,PF3D7_0317200,PF3D7_0320300,PF3D7_0320800,PF3D7_0321600,PF3D7_0406100,PF3D7_0407900,PF3D7_0413600,PF3D7_0…	31.5	1.43	1.78	3.48008e-10	5.83958e-08	2.91979e-07
GO:0017076	purine nucleotide binding	683	215	PF3D7_0102900,PF3D7_0106700,PF3D7_0106800,PF3D7_0109800,PF3D7_0110600,PF3D7_0209800,PF3D7_0211200,PF3D7_0211800,PF3D7_0214000,PF3D7_0217500,PF3D7_0218000,PF3D7_0219600,PF3D7_0302100,PF3D7_0303000,PF3D7_0303100,PF3D7_0304200,PF3D7_0306800,PF3D7_0308200,PF3D7_0309500,PF3D7_0310500,PF3D7_0312400,PF3D7_0317200,PF3D7_0320300,PF3D7_0320800,PF3D7_0321600,PF3D7_0406100,PF3D7_0407900,PF3D7_0411900,PF3D7_0…	31.5	1.43	1.78	4.62614e-10	6.33477e-08	3.88133e-07
GO:0032555	purine ribonucleotide binding	680	214	PF3D7_0102900,PF3D7_0106700,PF3D7_0106800,PF3D7_0109800,PF3D7_0110600,PF3D7_0209800,PF3D7_0211200,PF3D7_0211800,PF3D7_0214000,PF3D7_0217500,PF3D7_0218000,PF3D7_0219600,PF3D7_0302100,PF3D7_0303000,PF3D7_0303100,PF3D7_0304200,PF3D7_0306800,PF3D7_0308200,PF3D7_0309500,PF3D7_0310500,PF3D7_0312400,PF3D7_0317200,PF3D7_0320300,PF3D7_0320800,PF3D7_0321600,PF3D7_0406100,PF3D7_0407900,PF3D7_0413600,PF3D7_0…	31.5	1.43	1.77	5.28527e-10	6.33477e-08	4.43434e-07
GO:0035639	purine ribonucleoside triphosphate binding	669	210	PF3D7_0102900,PF3D7_0106700,PF3D7_0106800,PF3D7_0109800,PF3D7_0110600,PF3D7_0209800,PF3D7_0211200,PF3D7_0211800,PF3D7_0214000,PF3D7_0217500,PF3D7_0218000,PF3D7_0219600,PF3D7_0302100,PF3D7_0303000,PF3D7_0303100,PF3D7_0304200,PF3D7_0306800,PF3D7_0308200,PF3D7_0309500,PF3D7_0310500,PF3D7_0312400,PF3D7_0317200,PF3D7_0320300,PF3D7_0320800,PF3D7_0321600,PF3D7_0406100,PF3D7_0407900,PF3D7_0413600,PF3D7_0…	31.4	1.42	1.76	1.04303e-09	9.72336e-08	8.75102e-07
GO:0043168	anion binding	716	223	PF3D7_0102900,PF3D7_0106700,PF3D7_0106800,PF3D7_0109800,PF3D7_0110600,PF3D7_0209800,PF3D7_0211200,PF3D7_0211800,PF3D7_0214000,PF3D7_0217500,PF3D7_0218000,PF3D7_0219600,PF3D7_0302100,PF3D7_0303000,PF3D7_0303100,PF3D7_0303700,PF3D7_0304200,PF3D7_0306800,PF3D7_0308200,PF3D7_0309500,PF3D7_0310500,PF3D7_0312400,PF3D7_0317200,PF3D7_0320300,PF3D7_0320800,PF3D7_0321600,PF3D7_0406100,PF3D7_0407900,PF3D7_0…	31.1	1.41	1.75	6.05849e-10	6.35384e-08	5.08307e-07
GO:0032559	adenyl ribonucleotide binding	577	172	PF3D7_0102900,PF3D7_0109800,PF3D7_0110600,PF3D7_0209800,PF3D7_0211800,PF3D7_0214000,PF3D7_0217500,PF3D7_0218000,PF3D7_0219600,PF3D7_0302100,PF3D7_0303000,PF3D7_0303100,PF3D7_0306800,PF3D7_0308200,PF3D7_0309500,PF3D7_0310500,PF3D7_0312400,PF3D7_0317200,PF3D7_0320300,PF3D7_0320800,PF3D7_0321600,PF3D7_0406100,PF3D7_0407900,PF3D7_0413600,PF3D7_0414000,PF3D7_0415000,PF3D7_0415300,PF3D7_0422500,PF3D7_0…	29.8	1.35	1.59	2.37127e-06	7.10535e-05	0.0019895
GO:0030554	adenyl nucleotide binding	579	172	PF3D7_0102900,PF3D7_0109800,PF3D7_0110600,PF3D7_0209800,PF3D7_0211800,PF3D7_0214000,PF3D7_0217500,PF3D7_0218000,PF3D7_0219600,PF3D7_0302100,PF3D7_0303000,PF3D7_0303100,PF3D7_0306800,PF3D7_0308200,PF3D7_0309500,PF3D7_0310500,PF3D7_0312400,PF3D7_0317200,PF3D7_0320300,PF3D7_0320800,PF3D7_0321600,PF3D7_0406100,PF3D7_0407900,PF3D7_0413600,PF3D7_0414000,PF3D7_0415000,PF3D7_0415300,PF3D7_0422500,PF3D7_0…	29.7	1.35	1.58	3.01952e-06	8.08455e-05	0.00253338
GO:0000166	nucleotide binding	806	239	PF3D7_0102900,PF3D7_0105800,PF3D7_0106700,PF3D7_0106800,PF3D7_0109800,PF3D7_0110600,PF3D7_0209800,PF3D7_0211200,PF3D7_0211800,PF3D7_0214000,PF3D7_0217500,PF3D7_0218000,PF3D7_0219600,PF3D7_0302100,PF3D7_0303000,PF3D7_0303100,PF3D7_0304200,PF3D7_0306800,PF3D7_0308200,PF3D7_0309500,PF3D7_0310500,PF3D7_0312400,PF3D7_0317200,PF3D7_0320300,PF3D7_0320800,PF3D7_0321600,PF3D7_0406100,PF3D7_0407900,PF3D7_0…	29.7	1.34	1.63	2.18185e-08	1.07681e-06	1.83057e-05
GO:1901265	nucleoside phosphate binding	806	239	PF3D7_0102900,PF3D7_0105800,PF3D7_0106700,PF3D7_0106800,PF3D7_0109800,PF3D7_0110600,PF3D7_0209800,PF3D7_0211200,PF3D7_0211800,PF3D7_0214000,PF3D7_0217500,PF3D7_0218000,PF3D7_0219600,PF3D7_0302100,PF3D7_0303000,PF3D7_0303100,PF3D7_0304200,PF3D7_0306800,PF3D7_0308200,PF3D7_0309500,PF3D7_0310500,PF3D7_0312400,PF3D7_0317200,PF3D7_0320300,PF3D7_0320800,PF3D7_0321600,PF3D7_0406100,PF3D7_0407900,PF3D7_0…	29.7	1.34	1.63	2.18185e-08	1.07681e-06	1.83057e-05
GO:0005524	ATP binding	567	168	PF3D7_0102900,PF3D7_0109800,PF3D7_0110600,PF3D7_0209800,PF3D7_0211800,PF3D7_0214000,PF3D7_0217500,PF3D7_0218000,PF3D7_0219600,PF3D7_0302100,PF3D7_0303000,PF3D7_0303100,PF3D7_0306800,PF3D7_0308200,PF3D7_0309500,PF3D7_0310500,PF3D7_0312400,PF3D7_0317200,PF3D7_0320300,PF3D7_0320800,PF3D7_0321600,PF3D7_0406100,PF3D7_0407900,PF3D7_0413600,PF3D7_0414000,PF3D7_0415000,PF3D7_0415300,PF3D7_0422500,PF3D7_0…	29.6	1.34	1.58	4.80093e-06	0.000115085	0.00402798
GO:0140096	catalytic activity, acting on a protein	482	138	PF3D7_0107800,PF3D7_0108000,PF3D7_0207500,PF3D7_0207700,PF3D7_0212900,PF3D7_0217500,PF3D7_0302100,PF3D7_0305700,PF3D7_0308600,PF3D7_0309000,PF3D7_0312400,PF3D7_0314700,PF3D7_0317000,PF3D7_0317200,PF3D7_0321500,PF3D7_0322000,PF3D7_0407900,PF3D7_0410300,PF3D7_0413600,PF3D7_0413900,PF3D7_0415300,PF3D7_0416400,PF3D7_0503500,PF3D7_0516700,PF3D7_0518300,PF3D7_0527200,PF3D7_0603400,PF3D7_0606900,PF3D7_0…	28.6	1.3	1.48	0.000229225	0.00377098	0.19232
GO:0043167	ion binding	1075	307	PF3D7_0102900,PF3D7_0106700,PF3D7_0106800,PF3D7_0107000,PF3D7_0107800,PF3D7_0109800,PF3D7_0110400,PF3D7_0110600,PF3D7_0208100,PF3D7_0209800,PF3D7_0211200,PF3D7_0211800,PF3D7_0214000,PF3D7_0215700,PF3D7_0217500,PF3D7_0218000,PF3D7_0219600,PF3D7_0302100,PF3D7_0303000,PF3D7_0303100,PF3D7_0303700,PF3D7_0304200,PF3D7_0305600,PF3D7_0306800,PF3D7_0308200,PF3D7_0309000,PF3D7_0309500,PF3D7_0310500,PF3D7_0…	28.6	1.29	1.57	8.60674e-09	5.15789e-07	7.22105e-06
