# Supplementary material for: Plasmodium falciparum S-Adenosylmethionine Synthetase Is Essential for Parasite Survival through a Complex Interaction Network with Cytoplasmic and Nuclear Proteins
Source: Microorganisms. 2022 Jul 14;10(7):1419. doi: 10.3390/microorganisms10071419 (PMC9320499; doi:10.3390/microorganisms10071419)
Supplement: Supplementary file 1 [file microorganisms-10-01419-s001.zip › Musabyimana et al-Microorganisms-Table S4.xlsx]

## Sheet: A_Transcription 
PlasmoDB ID	Protein ID	Protein name
PF3D7_0110400	Q8I241	DNA-directed RNA polymerase II subunit RPB9, putative
PF3D7_0215700	O96236	DNA-directed RNA polymerase subunit beta
PF3D7_0303300	O77315	DNA-directed RNA polymerases I, II, and III subunit RPABC2, putative
PF3D7_0318200	O77375	DNA-directed RNA polymerase subunit
PF3D7_0509400	Q8I410	DNA-directed RNA polymerase subunit
PF3D7_0610900	C6KSV4	Transcription elongation factor SPT5, putative
PF3D7_0708100	Q8IC08	DNA-directed RNA polymerases I, II, and III subunit RPABC5, putative
PF3D7_0714500	Q8IBV2	Transcription elongation factor s-II, putative
PF3D7_0907300	Q8I378	Prefoldin-like protein, putative
PF3D7_0923000	Q8I2S6	DNA-directed RNA polymerase II subunit RPB3, putative
PF3D7_0934100	Q8I2H7	TFIIH basal transcription factor complex helicase XPD subunit
PF3D7_1107500	Q8IIS7	Prefoldin, putative
PF3D7_1134700	Q8II17	DNA-directed RNA polymerase subunit beta
PF3D7_1143300	Q8IHT3	DNA-directed RNA polymerases I and III subunit RPAC1, putative
PF3D7_1205800	Q8I5Y7	High mobility group protein B3, putative
PF3D7_1206600	Q8I5X9	DNA-directed RNA polymerase subunit beta
PF3D7_1213700	Q8I5R8	DNA-directed RNA polymerases I, II, and III subunit RPABC3
PF3D7_1304900	Q8IER7	Probable DNA-directed RNA polymerase II subunit RPB11
PF3D7_1329000	Q8IE49	DNA-directed RNA polymerase subunit
PF3D7_1364800	Q8ID59	DNA-directed RNA polymerases I, II, and III subunit RPABC1, putative
PF3D7_1406200	Q8IM32	Transcription elongation factor SPT6, putative
PF3D7_1415200	Q8ILU4	DNA-directed RNA polymerases I and III subunit RPAC2, putative
PF3D7_1421400	A0A144A2J0	DNA-directed RNA polymerase III subunit RPC6

## Sheet: B_mRNA processing 
PlasmoDB ID	Protein ID	Protein name
PF3D7_0218500	O96265	Small nuclear ribonucleoprotein Sm D2
PF3D7_0218700	O96267	Pre-mRNA-processing protein 45, putative
PF3D7_0302000	O97334	Pre-mRNA-splicing factor PRP46, putative
PF3D7_0308600	O77325	Pre-mRNA-processing factor 19, putative
PF3D7_0321600	O97290	ATP-dependent RNA helicase DDX42, putative
PF3D7_0403700	Q8I1Z2	Pre-mRNA-splicing factor CLF1, putative
PF3D7_0405400	Q8I1X5	Pre-mRNA-processing-splicing factor 8, putative
PF3D7_0518500	A0A5K1K868	ATP-dependent RNA helicase DDX23, putative
PF3D7_0520300	Q8I3Q7	U6 snRNA-associated Sm-like protein LSm2
PF3D7_0522800	Q8I3N5	Pre-mRNA-splicing factor BUD31, putative
PF3D7_0614400	C6KSY5	Pre-mRNA-splicing factor CWF7, putative
PF3D7_0804800	Q8I6S4	Peptidyl-prolyl cis-trans isomerase
PF3D7_0819900	C0H4W2	U6 snRNA-associated Sm-like protein LSm3
PF3D7_0822300	Q8IB57	Small nuclear ribonucleoprotein G
PF3D7_0822800	C0H4X1	U5 small nuclear ribonucleoprotein 40 kDa protein, putative
PF3D7_0909800	C0H529	Small nuclear ribonucleoprotein Sm D3
PF3D7_0917600	Q8I2X7	Pre-mRNA-splicing factor ATP-dependent RNA helicase PRP43, putative
PF3D7_1003800	Q8IJZ9	U5 small nuclear ribonucleoprotein component, putative
PF3D7_1033600	Q7KQL1	Pre-mRNA-splicing factor CEF1, putative
PF3D7_1110200	Q8IIR0	Pre-mRNA-processing factor 6, putative
PF3D7_1125500	Q8IIA8	Small nuclear ribonucleoprotein Sm D1
PF3D7_1126900	Q8II94	Small nuclear ribonucleoprotein F, putative
PF3D7_1209200	Q8I5V6	U6 snRNA-associated Sm-like protein LSm7, putative
PF3D7_1220100	Q8I5L1	Pre-mRNA-processing factor 17, putative
PF3D7_1231500	Q8I5A5	Mitosis protein dim1, putative
PF3D7_1231600	Q8I5A4	Pre-mRNA-splicing factor ATP-dependent RNA helicase PRP2, putative
PF3D7_1234800	Q8I574	Splicing factor 3B subunit 3, putative
PF3D7_1248200	Q8I4V2	Pre-mRNA-splicing factor PFL2310w
PF3D7_1305400	Q8IER1	AAR2 protein, putative
PF3D7_1317000	Q8I6Z8	U4/U6.U5 tri-snRNP-associated protein 2, putative
PF3D7_1320900	C0H5C7	RNA-binding protein, putative
PF3D7_1325000	Q8IE68	U6 snRNA-associated Sm-like protein LSm6, putative
PF3D7_1343900	C0H5G7	U4/U6 small nuclear ribonucleoprotein PRP4, putative
PF3D7_1350200	Q8IDJ7	Small nuclear ribonucleoprotein E
PF3D7_1352700	Q8IDH3	Intron-binding protein aquarius, putative
PF3D7_1353400	Q8IDG6	Ran-binding protein, putative
PF3D7_1414800	Q8ILU8	Small nuclear ribonucleoprotein-associated protein B, putative
PF3D7_1439100	Q8IL78	DEAD/DEAH box helicase, putative

## Sheet: C_D_Ribosomal proteins
PlasmoDB ID	Protein ID	Protein name
PF3D7_0306900	O97248	40S ribosomal protein S23, putative
PF3D7_0307100	O97249	40S ribosomal protein S12
PF3D7_0307200	O97250	60S ribosomal protein L7, putative
PF3D7_0309600	O00806	60S acidic ribosomal protein P2
PF3D7_0316800	O77395	40S ribosomal protein S15A, putative
PF3D7_0317600	O77381	40S ribosomal protein S11, putative
PF3D7_0322900	O97313	40S ribosomal protein S3a
PF3D7_0415900	C0H4A6	Ribosomal protein L15
PF3D7_0418200	Q8I1Q5	Eukaryotic translation initiation factor 3 subunit M
PF3D7_0418700	Q8I1Q0	RNA-binding protein NOB1, putative
PF3D7_0422400	Q8IFP2	40S ribosomal protein S19
PF3D7_0503800	Q8I463	60S ribosomal protein L31
PF3D7_0507100	Q8I431	60S ribosomal protein L4
PF3D7_0516200	A0A5K1K925	40S ribosomal protein S11
PF3D7_0516900	Q8I3T9	60S ribosomal protein L2
PF3D7_0517000	Q8I3T8	60S ribosomal protein L12, putative
PF3D7_0517700	Q8I3T1	Eukaryotic translation initiation factor 3 subunit B
PF3D7_0519400	Q8I3R6	40S ribosomal protein S24
PF3D7_0520000	Q8I3R0	40S ribosomal protein S9, putative
PF3D7_0607000	C6KSR8	Translation initiation factor IF-2, putative
PF3D7_0705700	C0H4K8	40S ribosomal protein S29, putative
PF3D7_0716800	Q8IBT2	Eukaryotic translation initiation factor 3 subunit I
PF3D7_0719600	Q8IBQ6	60S ribosomal protein L11a, putative
PF3D7_0719700	Q8IBQ5	40S ribosomal protein S10, putative
PF3D7_0721600	Q8IBN5	40S ribosomal protein S5, putative
PF3D7_0813900	Q8IAX5	40S ribosomal protein S16, putative
PF3D7_0814000	Q8IAX6	60S ribosomal protein L13
PF3D7_0815600	Q8IAZ3	Eukaryotic translation initiation factor 3 subunit G
PF3D7_0821700	Q8IB51	60S ribosomal protein L22, putative
PF3D7_0826700	Q8IBA0	Receptor for activated c kinase
PF3D7_0903900	Q8I3B0	60S ribosomal protein L32
PF3D7_0918300	Q8I2X0	Eukaryotic translation initiation factor 3 subunit F, putative
PF3D7_1003500	Q8IK02	40S ribosomal protein S20e, putative
PF3D7_1004000	Q8IJZ7	60S ribosomal protein L13, putative
PF3D7_1007900	Q8IJW4	Eukaryotic translation initiation factor 3 subunit D
PF3D7_1019400	Q8IJK8	60S ribosomal protein L30e, putative
PF3D7_1026800	Q8IJD4	40S ribosomal protein SA
PF3D7_1027800	Q8IJC6	60S ribosomal protein L3
PF3D7_1103100	Q8IIX0	60S acidic ribosomal protein P1, putative
PF3D7_1105400	Q8IIU8	40S ribosomal protein S4
PF3D7_1126200	Q8IIA2	40S ribosomal protein S18, putative
PF3D7_1130100	Q8II62	60S ribosomal protein L38
PF3D7_1130200	Q8II61	60S acidic ribosomal protein P0
PF3D7_1142600	Q8IHT9	60S ribosomal protein L35ae, putative
PF3D7_1144000	Q8IHS5	40S ribosomal protein S21
PF3D7_1204300	Q8I603	Eukaryotic translation initiation factor 5A
PF3D7_1206200	Q8I5Y3	Eukaryotic translation initiation factor 3 subunit C
PF3D7_1242700	Q8I502	40S ribosomal protein S17, putative
PF3D7_1302800	Q8IET7	40S ribosomal protein S7
PF3D7_1309100	Q8IEM3	60S ribosomal protein L24, putative
PF3D7_1317800	C0H5C2	40S ribosomal protein S19
PF3D7_1323100	Q8IE85	60S ribosomal protein L6, putative
PF3D7_1323400	Q8IE82	60S ribosomal protein L23
PF3D7_1331800	Q8IE09	60S ribosomal protein L23, putative
PF3D7_1338200	A0A5K1K8V8	60S ribosomal protein L6, putative
PF3D7_1341200	Q8IDS6	60S ribosomal protein L18a
PF3D7_1342000	Q8IDR9	40S ribosomal protein S6
PF3D7_1356300	Q8IDD9	Ubiquitin-conjugating enzyme E2, putative
PF3D7_1358800	Q8IDB0	40S ribosomal protein S15
PF3D7_1365900	Q8ID50	Ubiquitin-60S ribosomal protein L40
PF3D7_1408600	Q8IM10	40S ribosomal protein S8
PF3D7_1414300	Q8ILV2	60S ribosomal protein L10, putative
PF3D7_1419700	Q8ILQ3	Uncharacterized protein
PF3D7_1421200	Q8ILN8	40S ribosomal protein S25
PF3D7_1424100	Q8ILL3	60S ribosomal protein L5, putative
PF3D7_1424400	Q8ILL2	60S ribosomal protein L7-3, putative
PF3D7_1426000	Q8ILK3	60S ribosomal protein L21
PF3D7_1431700	Q8ILE8	60S ribosomal protein L14, putative
PF3D7_1441200	Q8IL58	60S ribosomal protein L1, putative
PF3D7_1447000	Q8IL02	40S ribosomal protein S5
PF3D7_1451100	Q8IKW5	Elongation factor 2
PF3D7_1451900	Q8IKV7	Ribosome biogenesis protein TSR1, putative
PF3D7_1460700	Q8IKM5	60S ribosomal protein L27
PF3D7_1461300	Q8IKL9	40S ribosomal protein S28e, putative
PF3D7_1465900	Q8IKH8	40S ribosomal protein S3

## Sheet: C_Translation initiation
PlasmoDB ID	Protein ID	Protein name
PF3D7_0728000	Q8IBH7	Eukaryotic translation initiation factor 2 subunit alpha
PF3D7_0828500	Q8IBB6	Translation initiation factor eIF-2B subunit alpha, putative
PF3D7_1010600	Q8IJT9	Eukaryotic translation initiation factor 2 subunit beta
PF3D7_1013900	Q8IJQ6	Translation initiation factor eIF-2B subunit delta, putative
PF3D7_1213900	A0A144A0U7	W2 domain-containing protein
PF3D7_1250600	Q8I4S8	Translation initiation factor eIF-2B subunit beta, putative
PF3D7_1326400	A0A5K1K977	Translation initiation factor eIF-2B subunit gamma, putative
PF3D7_1410600	Q8ILY9	Eukaryotic translation initiation factor 2 subunit gamma, putative

## Sheet: E_Proteasome
PlasmoDB ID	Protein ID	Protein name
PF3D7_0108000	Q8I261	Proteasome subunit beta
PF3D7_0205900	O96153	26S proteasome regulatory subunit RPN1, putative
PF3D7_0311300	O77353	Phosphatidylinositol 3- and 4-kinase, putative
PF3D7_0312300	O77345	26S proteasome regulatory subunit RPN12, putative
PF3D7_0317000	O77396	Proteasome subunit alpha type-3, putative
PF3D7_0317800	O77379	26S proteasome non-ATPase regulatory subunit 9, putative
PF3D7_0413600	Q8I1V1	26S protease regulatory subunit 6B, putative
PF3D7_0518300	A0A5K1K7U1	Proteasome subunit beta
PF3D7_0527200	Q8I3J3	Ubiquitin carboxyl-terminal hydrolase
PF3D7_0608500	C6KST3	Proteasome endopeptidase complex
PF3D7_0727400	Q8IBI3	Proteasome subunit alpha type
PF3D7_0803800	Q7K6A9	Proteasome subunit beta
PF3D7_0807500	Q8IAR3	Proteasome endopeptidase complex
PF3D7_0807800	Q8IAR6	26S proteasome regulatory subunit RPN10, putative
PF3D7_0907700	Q8I374	Proteasome activator 28 subunit beta, putative
PF3D7_0912900	Q8I323	26S proteasome regulatory subunit RPN8, putative
PF3D7_0931800	Q8I0U7	Proteasome subunit beta type-6, putative
PF3D7_1008400	Q8IJW0	26S protease regulatory subunit 4, putative
PF3D7_1011400	Q8IJT1	Proteasome subunit beta
PF3D7_1017900	Q8IJM0	26S proteasome regulatory subunit p55, putative
PF3D7_1030500	Q8IJA0	26S proteasome regulatory subunit RPN9, putative
PF3D7_1117100	Q8IIJ6	Ubiquitin carboxyl-terminal hydrolase UCH54
PF3D7_1119000	Q8IIH7	Acyl-CoA-binding protein, putative
PF3D7_1129200	Q8II71	26S proteasome regulatory subunit RPN7, putative
PF3D7_1130400	Q8II60	26S protease regulatory subunit 6A, putative
PF3D7_1248900	Q8I4U5	26S protease regulatory subunit 8, putative
PF3D7_1306400	Q8IEQ1	26S protease regulatory subunit 10B, putative
PF3D7_1311500	Q8IEK3	26S protease regulatory subunit 7, putative
PF3D7_1328100	Q8I6T3	Proteasome subunit beta
PF3D7_1338100	A0A5K1K9F3	26S proteasome regulatory subunit RPN3, putative
PF3D7_1353800	Q8IDG3	Proteasome subunit alpha type
PF3D7_1353900	Q8IDG2	Proteasome subunit alpha type
PF3D7_1368100	Q8ID28	26S proteasome regulatory subunit RPN11, putative
PF3D7_1402300	Q8IM66	26S proteasome regulatory subunit RPN6
PF3D7_1414000	Q8ILV5	26S proteasome regulatory subunit RPN13, putative
PF3D7_1466300	Q8IKH3	26S proteasome regulatory subunit RPN2, putative
PF3D7_1470900	Q8IKC9	Proteasome subunit beta
PF3D7_1474800	Q8IK90	Proteasome endopeptidase complex

## Sheet: F_DNA replication & repair
PlasmoDB ID	Protein ID	Protein name
PF3D7_0527000	Q8I3J5	DNA replication licensing factor MCM3, putative
PF3D7_0705300	Q8IC17	Origin recognition complex subunit 2
PF3D7_0705400	Q8IC16	DNA replication licensing factor MCM7
PF3D7_1211700	Q8I5T4	DNA replication licensing factor MCM5, putative
PF3D7_1317100	Q8IEE5	DNA replication licensing factor MCM4
PF3D7_1355100	Q8IDF0	DNA helicase
PF3D7_1412100	Q8ILX3	Mini-chromosome maintenance complex-binding protein, putative
PF3D7_1417800	Q8ILR7	DNA helicase
